# Supplementary material
Source: PubMed Central journal article supplement (PMC7531042)
Supplement: NIHMS1627037-supplement-SI.pdf [file NIHMS1627037-supplement-SI.pdf]

*Supporting Information for:*

# **P(III)/P(V)-Catalyzed Methylamination of Arylboronic Acids and Esters: Reductive C–N Coupling with Nitromethane as a Methylamine Surrogate**

Gen Li, Ziyang Qin, Alexander T. Radosevich\*

Department of Chemistry, Massachusetts Institute of Technology, Cambridge, Massachusetts 02139, United States.

Correspondence to: radosevich@mit.edu

## **Contents**

|             |                                                                                                                    |            |
|-------------|--------------------------------------------------------------------------------------------------------------------|------------|
| <b>I.</b>   | <b>General Materials and Methods</b> .....                                                                         | <b>S2</b>  |
| <b>II.</b>  | <b>Studies of Experimental Variables</b> .....                                                                     | <b>S3</b>  |
| <b>III.</b> | <b>Examples of Methylamination of Boronic Acids (Esters)</b> .....                                                 | <b>S5</b>  |
|             | A. General Procedure.....                                                                                          | <b>S5</b>  |
|             | B. Analytical Data for Methylamination Products.....                                                               | <b>S7</b>  |
|             | C. Preparation of Boronic Acid (Esters).....                                                                       | <b>S20</b> |
| <b>IV.</b>  | <b>Mechanistic Studies</b> .....                                                                                   | <b>S27</b> |
| <b>V.</b>   | <b>Specialized Applications and Examples</b> .....                                                                 | <b>S31</b> |
|             | A. Isotopic labelling from H <sub>3</sub> C–NO <sub>2</sub> isotopologues .....                                    | <b>S31</b> |
|             | B. ( <sup>15</sup> N)Nitromethane Preparation.....                                                                 | <b>S33</b> |
|             | C. Reactivity Comparison for (MeNO <sub>2</sub> vs ArNO <sub>2</sub> ) and (ArB(OH) <sub>2</sub> vs ArBpin). ..... | <b>S36</b> |
|             | D. Benzene-1,4-Diamine Synthesis from a Three-Component Reaction.....                                              | <b>S38</b> |
|             | E. Target Molecule Synthesis: Triflubazam .....                                                                    | <b>S39</b> |
| <b>VI.</b>  | <b>DFT Computation of Orbital Eigenvalues for MeNO<sub>2</sub> and PhNO<sub>2</sub></b> .....                      | <b>S41</b> |
| <b>VII.</b> | <b>Spectral Data</b> .....                                                                                         | <b>S42</b> |

## I. General Materials and Methods

All reagents (including commercial phosphorus reagents used in optimization studies) were purchased from commercial vendors (Sigma-Aldrich, Alfa Aesar, Acros, TCI, Oakwood Chemical or Combi-Blocks) and used without further purification unless otherwise indicated. Dichloromethane, diethyl ether, dimethylformamide, and tetrahydrofuran were purified and collected under argon using a Glass Contour Solvent Purification System. Anhydrous *m*-xylene and cyclopentyl methyl ether were obtained from a Sigma-Aldrich (sure-seal<sup>®</sup> bottle) and used as received. All other solvents were ACS grade or better and were used without further purification unless otherwise noted. Manipulations were conducted under an atmosphere of dry N<sub>2</sub> gas unless otherwise noted. The catalytic methylation reactions were carried out in glass culture tubes with threaded end (20 x 125 mm; Fisher Scientific part # 14-959-35A), outfitted with a phenolic screw-thread open top cap (Kimble-Chase part #73804-15425), and PTFE-lined silicone septum (Thermo Fisher part # B7995-15). Column chromatography was carried out on silica gel (SiliFlash<sup>®</sup> Irregular Silica Gel, P60 40-63 $\mu$ m) or aluminum oxide (activated, neutral, Brockmann I) as noted. <sup>1</sup>H, <sup>2</sup>H, <sup>13</sup>C, <sup>19</sup>F, and <sup>31</sup>P NMR were collected with either Bruker AVANCE-400, DPX 400, VARIAN Inova-500, or JEOL 500 MHz spectrometers and processed using either MestReNova or Bruker software. <sup>1</sup>H NMR chemical shifts are given in ppm with respect to solvent residual peak (CDCl<sub>3</sub>,  $\delta$  7.26 ppm; DMSO-*d*<sub>6</sub>,  $\delta$  2.50 ppm; TMS,  $\delta$  0.00 ppm). <sup>2</sup>H NMR chemical shifts are given in ppm with respect to solvent residual peak (CDCl<sub>3</sub>,  $\delta$  7.26 ppm; CD<sub>2</sub>Cl<sub>2</sub>-*d*<sub>6</sub>,  $\delta$  5.30 ppm). <sup>13</sup>C {<sup>1</sup>H} NMR shifts are given in ppm with respect to (CDCl<sub>3</sub>  $\delta$  77.16 ppm, DMSO-*d*<sub>6</sub>,  $\delta$  39.52 ppm). <sup>31</sup>P NMR shifts are given in ppm with respect to 85% H<sub>3</sub>PO<sub>4</sub> ( $\delta$  0.0 ppm) as an external standard. Multiplicities are described as s = singlet, br s = broad singlet, d = doublet, t = triplet, q = quartet, dd = doublet of doublets, td = triplet of doublets, m = multiplet. Coupling constants are reported in Hertz (Hz). High-resolution ESI mass spectra were obtained from the Mass Spectrometry Laboratory at the MIT department of chemistry instrumentation on a JEOL AccuTOF-DART (JMS-T100LP, ionSense DART source).

## II. Optimization of the Reductive C–N Coupling Reaction

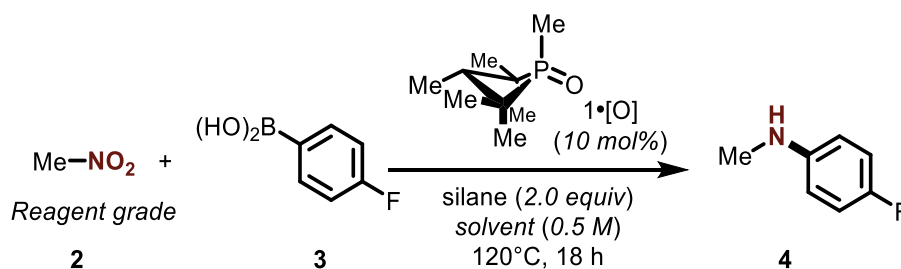

To an oven-dried glass culture tube described in the General Methods section was added a small stir bar, 4-fluorophenylboronic acid **2** (36 mg, 0.25 mmol, 1.0 equiv, 97% purity), phosphine oxide precatalyst (10 mol% unless otherwise noted), and nitromethane **3** (41  $\mu\text{L}$ , 0.75 mmol, 3.0 equiv unless otherwise noted). The tube thread was wrapped once with Teflon tape and a phenolic screw-thread open-top cap fitted with a PTFE-lined silicone septum (Thermo Scientific) was screwed on. Following evacuation and the introduction of nitrogen on a Schlenk line, dry solvent (0.5 M) was added via syringe from a sure-seal<sup>®</sup> bottle. Lastly, silane was added and the reaction mixture was stirred at 120 °C. When complete, the reaction vessel screw cap was unscrewed (note that in some cases pressure release was observed) and dibromomethane (17.5  $\mu\text{L}$ , 0.25 mmol, 1.0 equiv) was added as internal standard. The reaction mixture was diluted with 3 mL of  $\text{CDCl}_3$  and analyzed by quantitative  $^1\text{H}$  NMR. The yield was determined by relative integration between  $\text{CH}_2\text{Br}_2$  (4.93 ppm, 1.0 equiv  $\times$  2H = 200%) and product **4** [(2.81 ppm, 3H) or (6.51–6.58 ppm, 2H)]. Number of scans = 16 and relaxation delay = 4 seconds.

**Table S1.** Discovery and Optimization of Organophosphorus-Catalyzed *N*-methyl-amine Synthesis.

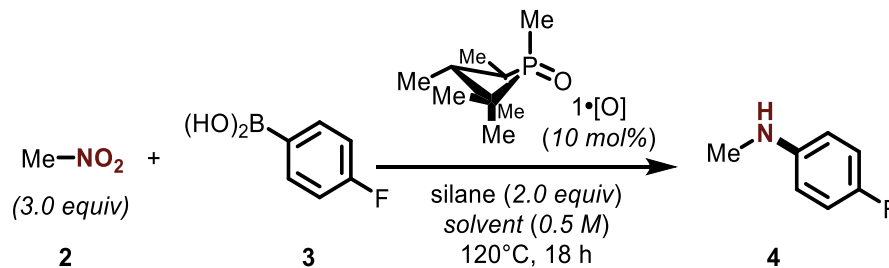

| Entry             | Solvent          | Silane                           | R <sub>3</sub> P=O | Yield (%) |
|-------------------|------------------|----------------------------------|--------------------|-----------|
| 1                 | CPME             | PhSiH <sub>3</sub>               | <b>1•[O]</b>       | 95(90)%   |
| 2                 | CPME             | PhSiH <sub>3</sub>               | <b>1</b>           | 94%       |
| 3                 | CPME             | PhSiH <sub>3</sub>               | None               | 0%        |
| 4                 | CPME             | None                             | <b>1•[O]</b>       | 0%        |
| 5 <sup>b</sup>    | CPME             | Ph <sub>2</sub> SiH <sub>2</sub> | <b>1•[O]</b>       | 87%       |
| 6 <sup>b</sup>    | CPME             | PMHS                             | <b>1•[O]</b>       | 85%       |
| 7                 | <i>m</i> -xylene | PhSiH <sub>3</sub>               | <b>1•[O]</b>       | 51%       |
| 8                 | dioxane          | PhSiH <sub>3</sub>               | <b>1•[O]</b>       | 90%       |
| 9 <sup>c</sup>    | CPME             | PhSiH <sub>3</sub>               | <b>1•[O]</b>       | 73%       |
| 10 <sup>d,f</sup> | CPME             | PhSiH <sub>3</sub>               | <b>1•[O]</b>       | 84%       |
| 11 <sup>e,f</sup> | CPME             | PhSiH <sub>3</sub>               | <b>1•[O]</b>       | 89%       |

<sup>a</sup> Yields were determined through <sup>1</sup>H NMR analysis with the aid of dibromomethane as an internal standard. <sup>b</sup> 24 h reaction time. <sup>c</sup> 2 equiv of nitromethane was used. <sup>d</sup> Reaction run under air. <sup>e</sup> 2.0 equiv of H<sub>2</sub>O added.

### III. Examples of Methylamination of Boronic Acids (Esters)

#### A. General procedure:

**General Procedure 1A.** To a glass culture tube described in the General Methods section was added a small stir bar, the appropriate boronic acid/boronic acid ester (if solid), phosphetane oxide precatalyst **1**•[O] (10 mol% unless otherwise noted). The tube thread was wrapped once with Teflon tape and a phenolic screw-thread open-top cap fitted with a PTFE-lined silicone septum (Thermo Scientific) was screwed on. No special drying of the reaction vessel components was conducted prior. Following evacuation and the introduction of nitrogen on a Schlenk line, dry *cyclopentyl methyl ether* (0.5 M) was added via syringe from a sure-seal<sup>®</sup> bottle. Lastly, phenylsilane (or diphenylsilane) and nitromethane were added and the reaction mixture was stirred at 120 °C. Upon completion, the reaction vessel screw cap was unscrewed (note that in some cases pressure release was observed) and 10 mL of ethyl acetate was added following by extraction with 4x15 mL 5 M aqueous HCl solution. After mixing and separating the organic layer, the aqueous layer was neutralized with 1 M NaOH aqueous solution to pH=14, then transferred to a separatory funnel. Each aqueous phase was back-extracted with 4x15 mL portions of DCM. The combined organic layers were dried over anhydrous sodium sulfate, filtered and concentrated with aid of a rotary evaporator. The crude residues were purified via column chromatography to yield pure coupling products. Columns were primarily slurry packed with hexanes and mobile phase polarity was increased gradually to the mixture indicated. Note: hexanes = Hex, dichloromethane = DCM, ethyl acetate = EA.

**General Procedure 1B.** To a glass culture tube described in the General Methods section was added a small stir bar, the appropriate boronic acid/boronic acid ester (if solid), phosphetane oxide precatalyst **1**•[O] (10 mol% unless otherwise noted). The tube thread was wrapped once with Teflon tape and a phenolic screw-thread open-top cap fitted with a PTFE-lined silicone septum (Thermo Scientific) was screwed on. No special drying of the reaction vessel components was conducted prior. Following evacuation and the introduction of nitrogen on a Schlenk line, dry *cyclopentyl methyl ether* (0.5 M) was added via syringe from a sure-seal<sup>®</sup> bottle. Lastly, phenylsilane (or diphenylsilane) and nitromethane were added and the reaction mixture was stirred at 120 °C. When completed, the reaction vessel screw cap was unscrewed (note that in some cases pressure release was observed) and diluted with 10 mL ethyl acetate. The mixture were transferred to a 40 mL vial and concentrated with aid of a rotary evaporator. The crude residues were purified via column chromatography to yield pure coupling products. Columns were primarily slurry packed with hexanes and mobile phase polarity was increased gradually to the mixture indicated. Note: hexanes = Hex, dichloromethane = DCM, ethyl acetate = EA.

**General Procedure 1C.** To a glass culture tube described in the General Methods section was added a small stir bar, the appropriate boronic acid/boronic acid ester (if solid), phosphetane oxide precatalyst **1•[O]** (15 mol% unless otherwise noted). The tube thread was wrapped once with Teflon tape and a phenolic screw-thread open-top cap fitted with a PTFE-lined silicone septum (Thermo Scientific) was screwed on. No special drying of the reaction vessel components was conducted prior. Following evacuation and the introduction of nitrogen on a Schlenk line, dry *cyclopentyl methyl ether* (0.5 M) was added via syringe from a sure-seal<sup>®</sup> bottle. Lastly, phenylsilane (or diphenylsilane) and nitromethane were added and the reaction mixture was stirred at 120 °C. Upon completion, the reaction vessel screw cap was unscrewed (note that in some cases pressure release was observed) and 10 mL of ethyl acetate was added following by extraction with 4x15 mL 5 M aqueous HCl solution. After mixing and separating the organic layer, the aqueous layer was neutralized with 1 M NaOH aqueous solution to pH=14, then transferred to a separatory funnel. Each aqueous phase was back-extracted with 4x15 mL portions of DCM. The combined organic layers were dried over anhydrous sodium sulfate, filtered and concentrated with aid of a rotary evaporator. The crude residues were purified via column chromatography to yield pure coupling products. Columns were primarily slurry packed with hexanes and mobile phase polarity was increased gradually to the mixture indicated. Note: hexanes = Hex, dichloromethane = DCM, ethyl acetate = EA.

## B. Analytical Data for Methylation Products

### 4-Fluoro-*N*-methylaniline (4):

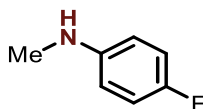

Following the **General Procedure 1A** using 4-fluorophenylboronic acid (70 mg, 0.50 mmol, 1.0 equiv), phenylsilane (123  $\mu$ L, 1.00 mmol, 2.0 equiv) and nitromethane (81.0  $\mu$ L, 1.50 mmol, 3.0 equiv) for 18 h at 120  $^{\circ}$ C. The product was purified by flash column chromatography with Hex:EA=19:1 on silica gel (56 mg, 90%).  $^1\text{H}$  NMR (400 MHz, Chloroform-*d*)  $\delta$  6.94 – 6.88 (m, 2H), 6.59 – 6.50 (m, 2H), 3.59 (s, 1H), 2.81 (s, 3H).  $^{13}\text{C}$  NMR (101 MHz, Chloroform-*d*)  $\delta$  155.9 (d,  $J = 234.4$  Hz), 145.8 (d,  $J = 1.8$  Hz), 115.7 (d,  $J = 22.3$  Hz), 113.2 (d,  $J = 7.3$  Hz), 31.4.  $^{19}\text{F}$  NMR (376 MHz, Chloroform-*d*)  $\delta$  -128.53 (tt,  $J = 8.6, 4.3$  Hz). HRMS (ESI) calculated for  $\text{C}_7\text{H}_9\text{FN}$   $[\text{M}+\text{H}]^+$ : 126.0713; Found: 126.0714.

### *N*-methylaniline (5):

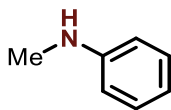

Following the **General Procedure 1A** using phenylboronic acid (1.2 g, 10 mmol, 1.0 equiv), phenylsilane (2.46 mL, 1.00 mmol, 2.0 equiv) and nitromethane (1.62 mL, 1.50 mmol, 3.0 equiv) for 18 h at 120  $^{\circ}$ C. The product was purified by flash column chromatography with Hex:EA=19:1 on silica gel (0.89 g, 83%).  $^1\text{H}$  NMR (400 MHz, Chloroform-*d*)  $\delta$  7.21 (ddd,  $J = 8.8, 7.3, 1.7$  Hz, 2H), 6.72 (ddt,  $J = 8.7, 7.3, 1.4$  Hz, 1H), 6.68 – 6.56 (m, 2H), 3.70 (br s, 1H), 2.85 (s, 3H).  $^{13}\text{C}$  NMR (101 MHz, Chloroform-*d*)  $\delta$  149.5, 129.3, 117.4, 112.5, 30.9. HRMS (ESI) calculated for  $\text{C}_7\text{H}_9\text{N}$   $[\text{M}+\text{H}]^+$ : 108.0813; Found: 108.0814.

### 4-Bromo-*N*-methylaniline (6):

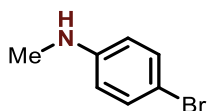

Following the **General Procedure 1A** using 4-bromophenylboronic acid (104 mg, 0.50 mmol, 1.0 equiv), phenylsilane (123  $\mu$ L, 1.00 mmol, 2.0 equiv) and nitromethane (81.0  $\mu$ L, 1.50 mmol, 3.0 equiv) for 24 h at 120  $^{\circ}$ C. The product was purified by flash column chromatography with Hex:EA=19:1 on silica gel (86 mg, 92%).  $^1\text{H}$  NMR (400 MHz, Chloroform-*d*)  $\delta$  7.30 – 7.22 (m, 2H), 6.54 – 6.44 (m, 2H), 3.69 (s, 1H),

2.81 (s, 3H).  $^{13}\text{C}$  NMR (101 MHz, Chloroform-*d*)  $\delta$  148.4, 132.0, 114.1, 108.9, 30.8. HRMS (ESI) calculated for  $\text{C}_7\text{H}_9\text{BrN}$   $[\text{M}+\text{H}]^+$ : 185.9913; Found: 185.9914.

#### 4-(Benzyloxy)-3,5-difluoro-*N*-methylaniline (7):

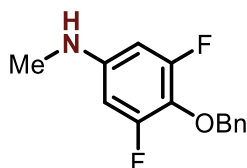

Following the **General Procedure 1A** using 4-benzyloxy-3,5-difluorophenylboronic acid (135 mg, 0.50 mmol, 1.0 equiv), diphenylsilane (372  $\mu\text{L}$ , 2.00 mmol, 4.0 equiv) and nitromethane (81.0  $\mu\text{L}$ , 1.50 mmol, 3.0 equiv) for 24 h at 120  $^\circ\text{C}$ . The product was purified by flash column chromatography with Hex:EA=19:1 on silica gel (64 mg, 52%).  $^1\text{H}$  NMR (400 MHz, Chloroform-*d*)  $\delta$  7.48 – 7.42 (m, 2H), 7.40 – 7.30 (m, 3H), 6.16 – 6.04 (m, 2H), 5.01 (s, 2H), 3.74 (s, 1H), 2.76 (s, 3H).  $^{13}\text{C}$  NMR (101 MHz, Chloroform-*d*)  $\delta$  158.6 (d,  $J = 8.4$  Hz), 156.1 (d,  $J = 8.3$  Hz), 145.8 (t,  $J = 12.5$  Hz), 137.1, 128.5 (d,  $J = 6.9$  Hz), 128.4, 96.0 (d,  $J = 7.9$  Hz), 95.8 (d,  $J = 7.7$  Hz), 76.7 (t,  $J = 2.4$  Hz), 30.9.  $^{19}\text{F}$  NMR (376 MHz, Chloroform-*d*)  $\delta$  -127.71. HRMS (ESI) calculated for  $\text{C}_{14}\text{H}_{14}\text{F}_2\text{NO}$   $[\text{M}+\text{H}]^+$ : 250.1038; Found: 250.1035.

#### 2-Bromo-*N*-methylaniline (8):

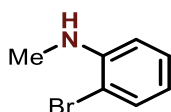

Following the **General Procedure 1A** using 2-bromophenylboronic acid (104 mg, 0.50 mmol, 1.0 equiv), diphenylsilane (279  $\mu\text{L}$ , 1.50 mmol, 3.0 equiv) and nitromethane (81.0  $\mu\text{L}$ , 1.50 mmol, 3.0 equiv) for 24 h at 120  $^\circ\text{C}$ . The product was purified by flash column chromatography with Hex:EA=9:1 on silica gel (78 mg, 84%).  $^1\text{H}$  NMR (400 MHz, Chloroform-*d*)  $\delta$  7.44 (dd,  $J = 7.9, 1.5$  Hz, 1H), 7.22 (ddd,  $J = 8.5, 7.4, 1.5$  Hz, 1H), 6.69 (dd,  $J = 8.2, 1.5$  Hz, 1H), 6.61 (td,  $J = 7.6, 1.5$  Hz, 1H), 4.80 (s, 1H), 2.91 (s, 3H).  $^{13}\text{C}$  NMR (101 MHz, Chloroform-*d*)  $\delta$  145.7, 132.4, 128.7, 118.2, 111.4, 110.0, 31.0. HRMS (ESI) calculated for  $\text{C}_7\text{H}_9\text{BrN}$   $[\text{M}+\text{H}]^+$ : 185.9913; Found: 185.9913.

#### 3-Iodo-*N*-methylaniline (9):



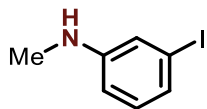

Following the **General Procedure 1B** using 3-iodophenylboronic acid (124 mg, 0.50 mmol, 1.0 equiv), phenylsilane (123  $\mu$ L, 1.00 mmol, 2.0 equiv) and nitromethane (81.0  $\mu$ L, 1.50 mmol, 3.0 equiv) for 24 h at 120  $^{\circ}$ C. The product was purified by flash column chromatography with Hex:EA=9:1 on silica gel (95 mg, 81%).  $^1\text{H}$  NMR (400 MHz, Chloroform-*d*)  $\delta$  7.02 (dt,  $J$  = 7.7, 1.3 Hz, 1H), 6.94 (t,  $J$  = 2.0 Hz, 1H), 6.88 (t,  $J$  = 7.9 Hz, 1H), 6.55 (ddd,  $J$  = 8.2, 2.4, 0.9 Hz, 1H), 3.73 (s, 1H), 2.80 (s, 3H).  $^{13}\text{C}$  NMR (101 MHz, Chloroform-*d*)  $\delta$  150.6, 130.7, 126.2, 120.9, 112.0, 95.4, 30.6. HRMS (ESI) calculated for  $\text{C}_7\text{H}_9\text{IN}$   $[\text{M}+\text{H}]^+$ : 233.9774.9913; Found: 233.9773.

### 3-Chloro-*N*,2-dimethylaniline (10):

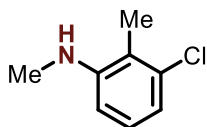

Following the **General Procedure 1A** using 3-chloro-2-methylphenylboronic acid (87 mg, 0.50 mmol, 1.0 equiv), phenylsilane (123  $\mu$ L, 1.00 mmol, 2.0 equiv) and nitromethane (81.0  $\mu$ L, 1.50 mmol, 3.0 equiv) for 24 h at 120  $^{\circ}$ C. The product was purified by flash column chromatography with Hex:EA=30:1 on silica gel (47 mg, 60%).  $^1\text{H}$  NMR (400 MHz, Chloroform-*d*)  $\delta$  7.07 (t,  $J$  = 8.1 Hz, 1H), 6.79 (dd,  $J$  = 8.0, 1.1 Hz, 1H), 6.52 (dd,  $J$  = 8.1, 1.1 Hz, 1H), 3.70 (s, 1H), 2.90 (s, 3H), 2.21 (s, 3H).  $^{13}\text{C}$  NMR (101 MHz, Chloroform-*d*)  $\delta$  148.5, 134.5, 127.4, 119.6, 117.9, 107.6, 31.1, 13.5. HRMS (ESI) calculated for  $\text{C}_8\text{H}_{11}\text{ClN}$   $[\text{M}+\text{H}]^+$ : 156.0575, Found: 156.0575.

### *N*,2-dimethylaniline (11):

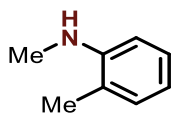

Following the **General Procedure 1A** using 2-methylphenylboronic acid (70 mg, 0.50 mmol, 1.0 equiv), phenylsilane (123  $\mu$ L, 1.00 mmol, 2.0 equiv) and nitromethane (81.0  $\mu$ L, 1.50 mmol, 3.0 equiv) for 24 h at 120  $^{\circ}$ C. The product was purified by flash column chromatography with Hex:EA=15:1 on silica gel (40 mg, 66%).  $^1\text{H}$  NMR (400 MHz, Chloroform-*d*)  $\delta$  7.17 (td,  $J$  = 7.7, 1.6 Hz, 1H), 7.06 (dd,  $J$  = 7.5, 1.6 Hz,

1H), 6.68 (td,  $J = 7.4, 1.2$  Hz, 1H), 6.62 (dd,  $J = 8.0, 1.1$  Hz, 1H), 3.58 (s, 1H), 2.90 (s, 3H), 2.14 (s, 3H).  $^{13}\text{C}$  NMR (101 MHz, Chloroform- $d$ )  $\delta$  147.4, 130.0, 127.3, 122.0, 117.0, 109.3, 30.9, 17.5. HRMS (ESI) calculated for  $\text{C}_8\text{H}_{12}\text{N}$   $[\text{M}+\text{H}]^+$ : 122.0964; Found: 122.0967.

***N*-methyl-naphthalen-1-amine (12):**

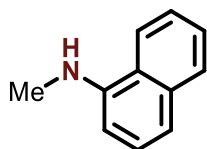

Following the **General Procedure 1A** using naphthalene-1-boronic acid (89 mg, 0.50 mmol, 1.0 equiv), diphenylsilane (372  $\mu\text{L}$ , 2.00 mmol, 4.0 equiv) and nitromethane (108  $\mu\text{L}$ , 2.00 mmol, 4.0 equiv) for 36 h at 120  $^\circ\text{C}$ . The product was purified by flash column chromatography with Hex:EA=20:1 on silica (56 mg, 71%).  $^1\text{H}$  NMR (400 MHz, Chloroform- $d$ )  $\delta$  7.88 – 7.76 (m, 2H), 7.49 (dd,  $J = 7.5, 1.8$  Hz, 2H), 7.43 (t,  $J = 7.8$  Hz, 1H), 7.29 (d,  $J = 8.2$  Hz, 1H), 6.64 (d,  $J = 7.5$  Hz, 1H), 4.44 (s, 1H), 3.04 (s, 3H).  $^{13}\text{C}$  NMR (101 MHz, Chloroform- $d$ )  $\delta$  144.6, 134.3, 128.7, 126.8, 125.8, 124.8, 123.6, 119.9, 117.4, 103.9, 31.1. HRMS (ESI) calculated for  $\text{C}_{11}\text{H}_{12}\text{N}$   $[\text{M}+\text{H}]^+$ : 158.0964, Found: 158.0961.

**Benzyl 4-(methylamino)benzoate (13):**

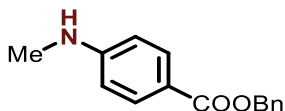

Following the **General Procedure 1B** using 4-benzylcarbonylphenylboronic acid (132 mg, 0.50 mmol, 1.0 equiv), diphenylsilane (279  $\mu\text{L}$ , 1.50 mmol, 3.0 equiv) and nitromethane (81.0  $\mu\text{L}$ , 1.50 mmol, 3.0 equiv) for 24 h at 120  $^\circ\text{C}$ . The product was purified by flash column chromatography with Hex:EA=15:1 on silica gel (96 mg, 80%).  $^1\text{H}$  NMR (400 MHz, Chloroform- $d$ )  $\delta$  7.96 – 7.88 (m, 2H), 7.44 (d,  $J = 7.2$  Hz, 2H), 7.41 – 7.35 (m, 2H), 7.35 – 7.29 (m, 1H), 6.59 – 6.51 (m, 2H), 5.32 (s, 2H), 4.19 (s, 1H), 2.88 (s, 3H).  $^{13}\text{C}$  NMR (101 MHz, Chloroform- $d$ )  $\delta$  166.8, 153.1, 136.9, 131.8, 128.6, 128.1(128.13), 128.1(128.09), 118.3, 111.2, 66.1, 30.3. HRMS (ESI) calculated for  $\text{C}_{15}\text{H}_{16}\text{NO}_2$   $[\text{M}+\text{H}]^+$ : 242.1176, Found: 242.1179.

***N*-methyl-4-((tetrahydro-2H-pyran-2-yl)oxy)aniline (14):**

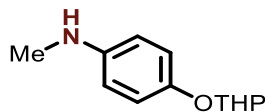

Following the **General Procedure 1B** using 4-(tetrahydro-2*H*-pyran-2-yloxy)phenylboronic acid (117 mg, 0.50 mmol, 1.0 equiv), phenylsilane (123  $\mu$ L, 1.00 mmol, 2.0 equiv) and nitromethane (81.0  $\mu$ l, 1.50 mmol, 3.0 equiv) for 24 h at 120  $^{\circ}$ C. The product was purified by flash column chromatography with Hex:EA=19:1 on silica gel (81 mg, 79%).  $^1\text{H}$  NMR (400 MHz, Chloroform-*d*)  $\delta$  7.01 – 6.88 (m, 2H), 6.61 – 6.52 (m, 2H), 5.25 (t,  $J$  = 3.4 Hz, 1H), 3.97 (ddd,  $J$  = 11.9, 9.0, 3.2 Hz, 1H), 3.58 (dtd,  $J$  = 11.3, 4.3, 1.5 Hz, 1H), 3.23 (s, 1H), 2.80 (s, 3H), 2.07 – 1.91 (m, 1H), 1.91 – 1.79 (m, 2H), 1.75 – 1.55 (m, 3H).  $^{13}\text{C}$  NMR (101 MHz, Chloroform-*d*)  $\delta$  149.4, 144.7, 118.3, 113.5, 97.9, 62.3, 31.6, 30.7, 25.5, 19.2. HRMS (ESI) calculated for  $\text{C}_{12}\text{H}_{18}\text{NO}_2$   $[\text{M}+\text{H}]^+$ : 208.1332; Found: 208.1343.

***N*-methyl-4-(methylthio)aniline (15):**

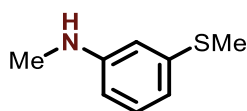

Following the **General Procedure 1A** using 4-(methylthio)phenylboronic acid (88 mg, 0.50 mmol, 1.0 equiv), phenylsilane (123  $\mu$ L, 1.00 mmol, 2.0 equiv) and nitromethane (81.0  $\mu$ l, 1.5 mmol, 3.0 equiv) for 24 h at 120  $^{\circ}$ C. The product was purified by flash column chromatography with Hex:EA=19:1 on silica gel (59 mg, 77%).  $^1\text{H}$  NMR (400 MHz, Chloroform-*d*)  $\delta$  7.10 (t,  $J$  = 7.9 Hz, 1H), 6.61 (ddd,  $J$  = 7.7, 1.8, 0.9 Hz, 1H), 6.51 (t,  $J$  = 2.1 Hz, 1H), 6.40 (ddd,  $J$  = 8.1, 2.4, 0.9 Hz, 1H), 3.79 (s, 1H), 2.83 (s, 3H), 2.47 (s, 3H).  $^{13}\text{C}$  NMR (101 MHz, Chloroform-*d*)  $\delta$  149.8, 139.4, 129.7, 115.6, 110.4, 109.9, 30.8, 16.0. HRMS (ESI) calculated for  $\text{C}_8\text{H}_{12}\text{NS}$   $[\text{M}+\text{H}]^+$ : 154.0685; Found: 154.0687.

**4-Chloro-*N*<sup>1</sup>-phenylbenzene-1,3-diamine (16):**

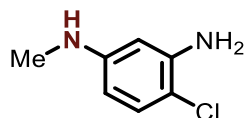

Following the **General Procedure 1A** using 3-amino-4-chlorophenylboronic acid (86 mg, 0.50 mmol, 1.0 equiv), diphenylsilane (372  $\mu$ L, 2.00 mmol, 4.0 equiv) and nitromethane (108  $\mu$ L, 2.00 mmol, 4.0 equiv) for 36 h at 120  $^{\circ}$ C. The product was purified by flash column chromatography with Hex:EA=15:1 on silica gel (44 mg, 56%).  $^1\text{H}$  NMR (400 MHz, Chloroform-*d*)  $\delta$  7.01 (d,  $J$  = 9.3 Hz, 1H), 6.02 – 5.99 (m, 2H), 3.80

(s, 3H), 2.78 (s, 3H).  $^{13}\text{C}$  NMR (101 MHz, Chloroform-*d*)  $\delta$  149.3, 143.5, 129.8, 108.2, 104.7, 99.3, 31.0. HRMS (ESI) calculated for  $\text{C}_7\text{H}_{10}\text{ClN}_2$   $[\text{M}+\text{H}]^+$ : 157.0524, Found: 157.0527.

#### 1-(4-(Methylamino)phenyl)ethan-1-one (17):

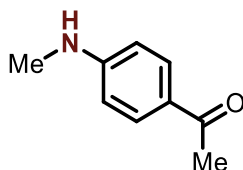

Following the **General Procedure 1A** using (4-acetylphenyl)boronic acid (82 mg, 0.50 mmol, 1.0 equiv), phenylsilane (123  $\mu\text{L}$ , 1.00 mmol, 2.0 equiv) and nitromethane (81  $\mu\text{L}$ , 1.5 mmol, 3.0 equiv) for 24 h at 120  $^\circ\text{C}$ . The product was purified by flash column chromatography with Hex:EA=20:1 on silica gel (45 mg, 61%).  $^1\text{H}$  NMR (400 MHz, Chloroform-*d*)  $\delta$  7.90 – 7.75 (m, 2H), 6.63 – 6.44 (m, 2H), 4.42 (s, 1H), 2.88 (d,  $J$  = 5.1 Hz, 3H), 2.49 (s, 3H).  $^{13}\text{C}$  NMR (101 MHz, Chloroform-*d*)  $\delta$  196.5, 153.3, 130.8, 126.5, 111.1, 30.1, 26.1. HRMS (ESI) calculated for  $\text{C}_9\text{H}_{12}\text{N}_2\text{O}$   $[\text{M}+\text{H}]^+$ : 150.0913, Found: 150.0913.

#### 4-(6-Methoxybenzo[d]thiazol-2-yl)-*N*-methylaniline (18):

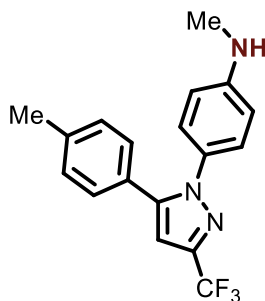

Following the **General Procedure 1A** using (4-(5-(*p*-tolyl)-3-(trifluoromethyl)-1*H*-pyrazol-1-yl)phenyl)boronic acid (87 mg, 0.25 mmol, 1.0 equiv), diphenylsilane (186  $\mu\text{L}$ , 1.00 mmol, 4.0 equiv) and nitromethane (41.0  $\mu\text{L}$ , 1.50 mmol, 3.0 equiv) for 36 h at 120  $^\circ\text{C}$ . The product was purified by flash column chromatography with Hex:EA=15:1 on silica gel (53 mg, 63%).  $^1\text{H}$  NMR (400 MHz, Chloroform-*d*)  $\delta$  7.16 – 7.06 (m, 6H), 6.68 (s, 1H), 6.57 – 6.49 (m, 2H), 3.89 (s, 1H), 2.84 (s, 3H), 2.34 (s, 3H).  $^{13}\text{C}$  NMR (101 MHz, Chloroform-*d*)  $\delta$  149.2, 144.6, 142.4 (q,  $J$  = 38.2 Hz), 138.6, 129.4, 129.3, 128.6, 126.8, 126.6, 121.7 (q,  $J$  = 268.9 Hz) 112.1, 104.5 (q,  $J$  = 1.9 Hz), 30.6, 21.3.  $^{19}\text{F}$  NMR (376 MHz, Chloroform-*d*)  $\delta$  -62.02. HRMS (ESI) calculated for  $\text{C}_{18}\text{H}_{17}\text{F}_3\text{N}_3$   $[\text{M}+\text{H}]^+$ : 332.1369, Found: 332.1373.

**(8R,9S,13S,14S)-13-Methyl-3-(methylamino)-6,7,8,9,11,12,13,14,15,16-decahydro-17H-cyclopenta[*a*]phenanthren-17-one (19):**

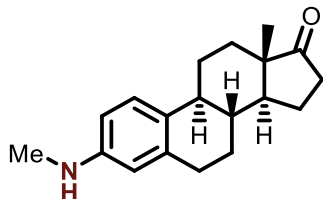

Following the **General Procedure 1A** using ((8R,9S,13S,14S)-13-methyl-17-oxo-7,8,9,11,12,13,14,15,16,17-decahydro-6H-cyclopenta[*a*]phenanthren-3-yl)boronic acid (75 mg, 0.25 mmol, 1.0 equiv), phenylsilane (61  $\mu$ L, 0.50 mmol, 2.0 equiv) and nitromethane (41  $\mu$ L, 0.75 mmol, 3.0 equiv) for 24 h at 120  $^{\circ}$ C. The product was purified by flash column chromatography with Hex:EA=20:1 on silica (40 mg, 56%).  $^1\text{H}$  NMR (400 MHz, Chloroform-*d*)  $\delta$  7.12 (d,  $J$  = 8.4 Hz, 1H), 6.47 (dd,  $J$  = 8.4, 2.5 Hz, 1H), 6.38 (s, 1H), 3.58 (s, 1H), 2.87 (dd,  $J$  = 10.4, 6.6 Hz, 2H), 2.82 (s, 3H), 2.50 (dd,  $J$  = 18.8, 8.6 Hz, 1H), 2.44 – 2.30 (m, 1H), 2.29 – 1.87 (m, 5H), 1.72 – 1.35 (m, 6H), 0.91 (s, 3H).  $^{13}\text{C}$  NMR (101 MHz, Chloroform-*d*)  $\delta$  147.6, 137.4, 128.9, 126.3, 112.6, 110.9, 50.6, 48.2, 44.1, 38.7, 36.0, 31.8, 31.10, 29.9, 26.8, 26.1, 21.7, 14.0. HRMS (ESI) calculated for  $\text{C}_{19}\text{H}_{26}\text{NO}$   $[\text{M}+\text{H}]^+$ : 284.2009, Found: 284.1997.

**4-(6-Methoxybenzo[*d*]thiazol-2-yl)-*N*-methylaniline (20):**

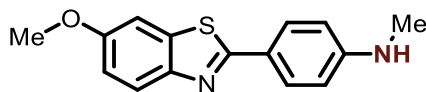

Following the **General Procedure 1A** using (4-(6-methoxybenzo[*d*]thiazol-2-yl)phenyl)boronic acid (71 mg, 0.25 mmol, 1.0 equiv), phosphetane oxide precatalyst **1•[O]** (8.7 mg, 0.05 mmol, 20 mol%), diphenylsilane (186  $\mu$ L, 1.00 mmol, 4.0 equiv) and nitromethane (41  $\mu$ L, 0.75 mmol, 3.0 equiv) for 36 h at 120  $^{\circ}$ C. The product was purified by flash column chromatography with Hex:EA=9:1 on silica (52 mg, 77%).  $^1\text{H}$  NMR (400 MHz, Chloroform-*d*)  $\delta$  7.91 – 7.83 (m, 3H), 7.32 (d,  $J$  = 2.5 Hz, 1H), 7.04 (dd,  $J$  = 8.9, 2.6 Hz, 1H), 6.68 – 6.60 (m, 2H), 4.09 (s, 1H), 3.88 (s, 3H), 2.91 (s, 3H).  $^{13}\text{C}$  NMR (101 MHz, Chloroform-*d*)  $\delta$  166.8, 157.3, 151.4, 149.0, 136.0, 128.9, 123.0, 122.9, 115.1, 112.2, 104.5, 56.0, 30.5. HRMS (ESI) calculated for  $\text{C}_{15}\text{H}_{15}\text{N}_2\text{OS}$   $[\text{M}+\text{H}]^+$ : 271.0900, Found: 271.0901.

***N*-methylquinolin-3-amine (21):**

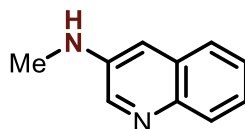

Following the **General Procedure 1C** using quinoline-3-ylboronic acid 1,3-propanediol ester (109 mg, 0.50 mmol, 1.0 equiv), diphenylsilane (372  $\mu$ L, 2.00 mmol, 4.0 equiv) and nitromethane (81.0  $\mu$ L, 1.50 mmol, 3.0 equiv) for 24 h at 120  $^{\circ}$ C. The product was purified by flash column chromatography with Hex:EA=15:1 on silica gel (74 mg, 93%).  $^1\text{H}$  NMR (400 MHz, Chloroform-*d*)  $\delta$  8.44 (d,  $J$  = 2.8 Hz, 1H), 7.98 – 7.90 (m, 1H), 7.67 – 7.60 (m, 1H), 7.42 (tt,  $J$  = 7.0, 5.1 Hz, 2H), 7.00 (d,  $J$  = 2.8 Hz, 1H), 4.06 (s, 1H), 2.95 (s, 3H).  $^{13}\text{C}$  NMR (101 MHz, Chloroform-*d*)  $\delta$  143.5, 142.7, 142.2, 129.7, 129.2, 127.1, 126.1, 125.0, 109.6, 30.5. HRMS (ESI) calculated for  $\text{C}_{10}\text{H}_{11}\text{N}_2$   $[\text{M}+\text{H}]^+$ : 159.0917, Found: 159.0914.

***N*-methylisoquinolin-5-amine (22):**

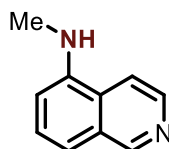

Following the **General Procedure 1C** using Isoquinoline-5-ylboronic acid 1,3-propanediol ester (109 mg, 0.50 mmol, 1.0 equiv), diphenylsilane (372  $\mu$ L, 2.00 mmol, 4.0 equiv) and nitromethane (81.0  $\mu$ L, 1.50 mmol, 3.0 equiv) for 24 h at 120  $^{\circ}$ C. The product was purified by flash column chromatography with Hex:EA=9:1 on silica gel (73 mg, 93%).  $^1\text{H}$  NMR (400 MHz, Chloroform-*d*)  $\delta$  9.16 (s, 1H), 8.46 (d,  $J$  = 6.0 Hz, 1H), 7.54 (d,  $J$  = 6.0 Hz, 1H), 7.49 (t,  $J$  = 7.9 Hz, 1H), 7.32 (d,  $J$  = 8.1 Hz, 1H), 6.74 (d,  $J$  = 7.6 Hz, 1H), 4.48 (s, 1H), 3.02 (s, 3H).  $^{13}\text{C}$  NMR (101 MHz, Chloroform-*d*)  $\delta$  153.0, 143.7, 142.0, 129.4, 128.3, 126.2, 116.1, 113.5, 107.2, 30.9. HRMS (ESI) calculated for  $\text{C}_{10}\text{H}_{11}\text{N}_2$   $[\text{M}+\text{H}]^+$ : 159.0917, Found: 159.0923.

***N*,1-dimethyl-1*H*-indazol-5-amine (23):**

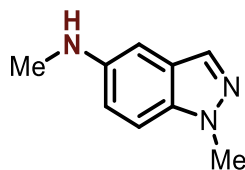

Following the **General Procedure 1C** using (1-methyl-1H-indazol-5-yl)boronic acid 1,3-propanediol ester (90 mg, 0.50 mmol, 1.0 equiv), phenylsilane (185  $\mu$ L, 1.50 mmol, 3.0 equiv) and nitromethane (108  $\mu$ L, 2.00 mmol, 4.0 equiv) for 36 h at 120  $^{\circ}$ C. The product was purified by flash column chromatography with Hex:EA=15:1 on silica gel (57 mg, 70%).  $^1\text{H}$  NMR (400 MHz, Chloroform-*d*)  $\delta$  7.90 (s, 1H), 7.62 (t,  $J$  = 1.4 Hz, 1H), 7.34 (d,  $J$  = 1.9 Hz, 2H), 4.04 (s, 3H), 3.00 (s, 3H).  $^{13}\text{C}$  NMR (101 MHz, Chloroform-*d*)  $\delta$  138.0, 134.7, 132.7, 124.2, 119.8, 110.6, 110.3, 36.5, 35.9. HRMS calculated for  $\text{C}_9\text{H}_{12}\text{N}_3$   $[\text{M}+\text{H}]^+$ : 162.1026, Found: 162.1026.

***N*-methylpyridin-3-amine (24):**

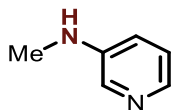

Following the **General Procedure 1C** using 3-pyridineboronic acid 1,3-propanediol ester (83 mg, 0.50 mmol, 1.0 equiv), phenylsilane (123  $\mu$ L, 1.00 mmol, 2.0 equiv) and nitromethane (81.0  $\mu$ L, 1.50 mmol, 3.0 equiv) for 36 h at 120  $^{\circ}$ C. The product was purified by flash column chromatography with Hex:EA=4:1 on silica gel (48 mg, 88%).  $^1\text{H}$  NMR (400 MHz, Chloroform-*d*)  $\delta$  8.02 (d,  $J$  = 3.0 Hz, 1H), 7.95 (dd,  $J$  = 4.7, 1.4 Hz, 1H), 7.08 (dd,  $J$  = 8.3, 4.7 Hz, 1H), 6.85 (ddd,  $J$  = 8.3, 3.0, 1.4 Hz, 1H), 3.82 (s, 1H), 2.84 (s, 3H).  $^{13}\text{C}$  NMR (101 MHz, Chloroform-*d*)  $\delta$  145.3, 138.7, 135.9, 123.8, 118.1, 30.4. HRMS (ESI) calculated for  $\text{C}_6\text{H}_9\text{N}_2$   $[\text{M}+\text{H}]^+$ : 109.0760, Found: 109.0761.

***N*-phenyl-4-(4,4,5,5-tetramethyl-1,3,2-dioxaborolan-2-yl)aniline (26):**

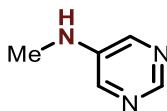

Following the **General Procedure 1C** using 3-pyrimidineboronic acid 1,3-propanediol ester (82 mg, 0.50 mmol, 1.0 equiv), phenylsilane (123  $\mu$ L, 1.00 mmol, 2.0 equiv) and nitromethane (81.0  $\mu$ L, 1.50 mmol, 3.0 equiv) for 24 h at 120  $^{\circ}$ C. The product was purified by flash column chromatography with Hex:EA=9:1 on silica gel (31 mg, 57%).  $^1\text{H}$  NMR (400 MHz, Chloroform-*d*)  $\delta$  8.61 (s, 1H), 8.11 (d,  $J$  = 1.1 Hz, 2H), 3.78 (s, 1H), 2.90 (d,  $J$  = 4.7 Hz, 3H).  $^{13}\text{C}$  NMR (101 MHz, Chloroform-*d*)  $\delta$  148.7, 142.7, 140.6, 30.1. HRMS (ESI) calculated for  $\text{C}_5\text{H}_8\text{N}_3$   $[\text{M}+\text{H}]^+$ : 110.0714, Found: 110.0713.

### 2-Methoxy-*N*-methylpyridin-3-amine (27):

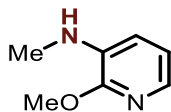

Following the **General Procedure 1C** using (2-methoxypyridin-3-yl)boronic acid 1,3-propanediol ester (97 mg, 0.50 mmol, 1.0 equiv), phenylsilane (123  $\mu$ L, 1.00 mmol, 2.0 equiv) and nitromethane (108  $\mu$ L, 2.00 mmol, 4.0 equiv) for 36 h at 120  $^{\circ}$ C. The product was purified by flash column chromatography with Hex:EA=19:1 on silica gel (42 mg, 60%).  $^1\text{H}$  NMR (400 MHz, Chloroform-*d*)  $\delta$  7.48 (dd,  $J = 5.1, 1.6$  Hz, 1H), 6.79 (dd,  $J = 7.6, 5.0$  Hz, 1H), 6.68 (dd,  $J = 7.6, 1.6$  Hz, 1H), 4.19 (s, 1H), 3.97 (s, 3H), 2.83 (s, 3H).  $^{13}\text{C}$  NMR (101 MHz, Chloroform-*d*)  $\delta$  152.6, 134.3, 132.6, 117.5, 114.0, 53.3, 30.0. HRMS (ESI) calculated for  $\text{C}_7\text{H}_{11}\text{N}_2\text{O}$   $[\text{M}+\text{H}]^+$ : 139.0864, Found: 139.0866.

### *N*-methylthiophen-3-amine (28):

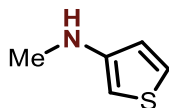

Following the **General Procedure 1C** using thiophen-3-ylboronic acid 1,3-propanediol ester (84 mg, 0.50 mmol, 1.0 equiv), phenylsilane (185  $\mu$ L, 1.50 mmol, 3.0 equiv) and nitromethane (108  $\mu$ L, 2.00 mmol, 4.0 equiv) for 48 h at 120  $^{\circ}$ C. The product was purified by flash column chromatography with Hex:EA=19:1 on silica gel (29 mg, 51%).  $^1\text{H}$  NMR (400 MHz, Chloroform-*d*)  $\delta$  7.16 (dd,  $J = 5.1, 3.1$  Hz, 1H), 6.62 (dd,  $J = 5.1, 1.5$  Hz, 1H), 5.96 (dd,  $J = 3.1, 1.5$  Hz, 1H), 2.83 (s, 3H).  $^{13}\text{C}$  NMR (101 MHz, Chloroform-*d*)  $\delta$  150.1, 125.4, 119.9, 95.3, 33.0. HRMS (ESI) calculated for  $\text{C}_5\text{H}_8\text{NS}$   $[\text{M}+\text{H}]^+$ : 114.0372, Found: 114.0350.

### *N*-methyl-4-(trifluoromethyl)aniline (28):

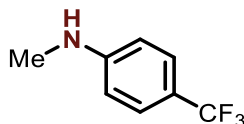

Following the **General Procedure 1C** using 4-trifluoromethylphenylboronic acid 1,3-propanediol ester (87 mg, 0.50 mmol, 1.0 equiv), phenylsilane (185  $\mu$ L, 1.50 mmol, 3.0 equiv) and nitromethane (81.0  $\mu$ L, 1.50 mmol, 3.0 equiv) for 30 h at 120  $^{\circ}$ C. The product was purified by flash column chromatography with Hex:EA=30:1 on silica gel (72 mg, 82%).  $^1\text{H}$  NMR (400 MHz, Chloroform-*d*)  $\delta$  7.41 (d,  $J = 8.4$  Hz, 2H),



6.60 (d,  $J = 8.5$  Hz, 2H), 4.10 (s, 1H), 2.87 (s, 3H).  $^{13}\text{C}$  NMR (101 MHz, Chloroform- $d$ )  $\delta$  151.7, 126.7 (q,  $J = 3.8$  Hz), 122.6 (q,  $J = 270.2$  Hz), 118.7 (q,  $J = 32.1$  Hz), 111.6, 30.4.  $^{19}\text{F}$  NMR (376 MHz, Chloroform- $d$ )  $\delta$  -60.95. HRMS (ESI) calculated for  $\text{C}_8\text{H}_9\text{F}_3\text{N}$   $[\text{M}+\text{H}]^+$ : 176.0682, Found: 176.0682.

#### 4-Methoxy-*N*-methylaniline (29):

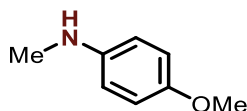

Following the **General Procedure 1C** using 4-methoxyphenylboronic acid 1,3-propanediol ester (96 mg, 0.50 mmol, 1.0 equiv), phenylsilane (185  $\mu\text{L}$ , 1.50 mmol, 3.0 equiv) and nitromethane (81.0  $\mu\text{L}$ , 1.50 mmol, 3.0 equiv) for 36 h at 120  $^\circ\text{C}$ . The product was purified by flash column chromatography with Hex:EA=30:1 on silica gel (43 mg, 62%).  $^1\text{H}$  NMR (400 MHz, Chloroform- $d$ )  $\delta$  6.84 – 6.77 (m, 2H), 6.64 – 6.55 (m, 2H), 3.76 (s, 3H), 3.44 (s, 1H), 2.81 (s, 3H).  $^{13}\text{C}$  NMR (101 MHz, Chloroform- $d$ )  $\delta$  152.2, 143.8, 115.0, 113.8, 56.0, 31.8. HRMS (ESI) calculated for  $\text{C}_8\text{H}_{12}\text{NO}$   $[\text{M}+\text{H}]^+$ : 138.0913, Found: 138.0913.

#### 4-(Methylamino)benzonitrile (30):

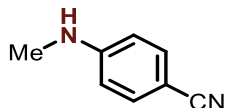

Following the **General Procedure 1C** using (4-cyanophenyl)boronic acid neopentyl ester (94 mg, 0.50 mmol, 1.0 equiv), phenylsilane (123  $\mu\text{L}$ , 1.00 mmol, 2.0 equiv) and nitromethane (135  $\mu\text{L}$ , 2.50 mmol, 5.0 equiv) for 24 h at 120  $^\circ\text{C}$ . The product was purified by flash column chromatography with Hex:EA=19:1 on silica gel (54 mg, 81%).  $^1\text{H}$  NMR (400 MHz, Chloroform- $d$ )  $\delta$  7.48 – 7.37 (m, 2H), 6.60 – 6.51 (m, 2H), 4.29 (s, 1H), 2.87 (s, 3H).  $^{13}\text{C}$  NMR (101 MHz, Chloroform- $d$ )  $\delta$  152.3, 133.8, 120.7, 112.0, 98.7, 30.1. HRMS (ESI) calculated for  $\text{C}_8\text{H}_9\text{N}_2$   $[\text{M}+\text{H}]^+$ : 133.0760, Found: 133.0761.

#### *N*-methyl-4-(4,4,5,5-tetramethyl-1,3,2-dioxaborolan-2-yl)aniline (31):

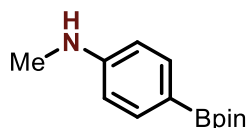

Following the **General Procedure 1B** using 1,4-bis(4,4,5,5-tetramethyl-1,3,2-dioxaborolan-2-yl)benzene (83 mg, 0.25 mmol, 1.0 equiv), phenylsilane (61  $\mu$ L, 0.50 mmol, 2.0 equiv) and nitromethane (68.0  $\mu$ L, 1.25 mmol, 5.0 equiv) for 36 h at 120  $^{\circ}$ C. The product was purified by flash column chromatography with Hex:EA=15:1 on silica gel (53 mg, 91%).  $^1\text{H}$  NMR (400 MHz, Chloroform-*d*)  $\delta$  7.69 – 7.61 (m, 2H), 6.62 – 6.54 (m, 2H), 3.92 (s, 1H), 2.85 (s, 4H), 1.32 (s, 12H).  $^{13}\text{C}$  NMR (101 MHz, Chloroform-*d*)  $\delta$  151.9, 136.5, 111.6, 83.3, 30.4, 25.0. [Note: the carbon attached to boron was not observed due to quadrupole broadening caused by the  $^{11}\text{B}$  nucleus]<sup>1</sup> HRMS (ESI) calculated for  $\text{C}_{13}\text{H}_{21}\text{BNO}_2$   $[\text{M}+\text{H}]^+$ : 234.1662, Found: 234.1666.

***N*-methyl-3,5-bis(trifluoromethyl)aniline (32):**

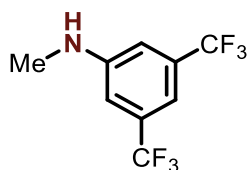

Following the **General Procedure 1C** using 3,5-ditrifluoromethylphenylboronic acid pinacol ester (87 mg, 0.25 mmol, 1.0 equiv), phenylsilane (62  $\mu$ L, 0.50 mmol, 2.0 equiv) and nitromethane (41  $\mu$ L, 0.75 mmol, 3.0 equiv) for 24 h at 120  $^{\circ}$ C. The product was purified by flash column chromatography with Hex:EA=19:1 on silica gel (56 mg, 92%).  $^1\text{H}$  NMR (400 MHz, Chloroform-*d*)  $\delta$  7.15 (s, 1H), 6.92 (s, 2H), 4.16 (s, 1H), 2.91 (d,  $J = 5.1$  Hz, 3H).  $^{13}\text{C}$  NMR (101 MHz, Chloroform-*d*)  $\delta$  149.8, 132.5 (q,  $J = 32.9$  Hz), 123.8 (q,  $J = 272.5$  Hz), 111.6 (d,  $J = 3.8$  Hz), 110.23 – 110.0 (m, 1C), 30.50.  $^{19}\text{F}$  NMR (376 MHz, Chloroform-*d*)  $\delta$  -63.21. HRMS calculated for  $\text{C}_9\text{H}_8\text{F}_6\text{N}$   $[\text{M}+\text{H}]^+$ : 244.0555, Found: 244.0559.

**Methyl (S)-2-((tert-butoxycarbonyl)amino)-3-(4-(methylamino)phenyl)propanoate (33):**

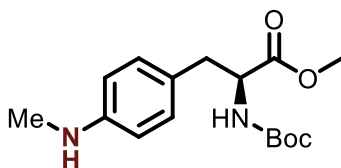

Following the **General Procedure 1B** using methyl (S)-2-((tert-butoxycarbonyl)amino)-3-(4-(4,4,5,5-tetramethyl-1,3,2-dioxaborolan-2-yl)phenyl)propanoate (101 mg, 0.25 mmol, 1.0 equiv), **1•[O]** (8.70 mg, 0.0375 mmol, 0.15 equiv), phenylsilane (61  $\mu$ L, 0.50 mmol, 2.0 equiv) and nitromethane (68.0  $\mu$ L, 1.25 mmol, 5.0 equiv) for 36 h at 120  $^{\circ}$ C. The product was purified by flash column chromatography with Hex:EA=9:1 on silica gel (61.8 mg, 80%).  $^1\text{H}$  NMR (400 MHz, Chloroform-*d*)  $\delta$  7.00 – 6.92 (m, 2H), 6.61 – 6.53 (m, 2H), 4.96 (d,  $J = 8.3$  Hz, 1H), 4.53 (q,  $J = 6.5$  Hz, 1H), 3.77 (brs, 1H), 3.73 (s, 3H), 3.00 (dd,  $J$

= 4.8, 2.4 Hz, 2H), 2.84 (s, 3H), 1.44 (s, 9H).  $^{13}\text{C}$  NMR (101 MHz, Chloroform-*d*)  $\delta$  172.8, 155.3, 148.4, 130.2, 124.5, 112.8, 54.8, 52.3, 37.6, 31.0, 30.9, 28.5. HRMS (ESI) calculated for  $\text{C}_{16}\text{H}_{24}\text{N}_2\text{O}_4\text{Na}$   $[\text{M}+\text{Na}]^+$ : 331.1628, Found: 331.1620.

### C. Preparation of Boronic Acid (Esters).

**General procedure 1D for preparation of Boronic Acid 1,3-Propanediol Esters:** To a glass culture tube described in the General Methods section was added an appropriate stir bar and the appropriate boronic acid (if solid). The tube thread was wrapped once with Teflon tape and a phenolic screw-thread open-top cap fitted with a PTFE-lined silicone septum (Thermo Scientific) was screwed on. No special drying of the reaction vessel components was conducted prior. Following evacuation and the introduction of nitrogen on a Schlenk line, dry *toluene* (0.5 M) (unless otherwise noted) was added via syringe from solvent system. Lastly, 1,3-propanediol was added and the reaction mixture was stirred at 80 °C overnight. Upon completion, the mixture was dried over anhydrous calcium chloride, filtered and concentrated with aid of a rotary evaporator to yield the product in sufficient purity for subsequent use without further purification.

#### 4-Trifluoromethylphenylboronic acid 1,3-propanediol ester:

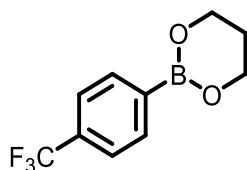

Following the **General Procedure 1D** using 4-Trifluoromethylphenylboronic acid (3.8 g, 20 mmol, 1.0 equiv), 1,3-propanediol (1.6 mL, 22 mmol, 1.1 equiv) at 80 °C for overnight. <sup>1</sup>H NMR (500 MHz, Chloroform-*d*) δ 7.86 (d, *J* = 7.7 Hz, 2H), 7.58 (d, *J* = 7.8 Hz, 2H), 4.18 (t, *J* = 5.5 Hz, 4H), 2.08 (p, *J* = 5.5 Hz, 2H). <sup>19</sup>F NMR (471 MHz, Chloroform-*d*) δ -62.88.

#### 4-Methoxyphenylboronic acid 1,3-propanediol ester:

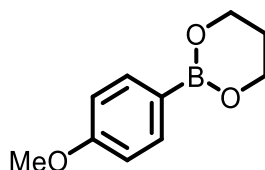

Following the **General Procedure 1D** using 4-Methoxyphenylboronic acid (3.0 g, 20 mmol, 1.0 equiv), 1,3-propanediol (1.6 mL, 22 mmol, 1.1 equiv) at 80 °C for overnight. <sup>1</sup>H NMR (400 MHz, Chloroform-*d*) δ 7.71 (dt, *J* = 9.2, 2.2 Hz, 2H), 6.92 – 6.84 (m, 2H), 4.15 (t, *J* = 5.5 Hz, 4H), 3.82 (s, 3H), 2.04 (p, *J* = 5.5 Hz, 2H).

#### (2-Methoxypyridin-3-yl)boronic acid 1,3-propanediol ester:

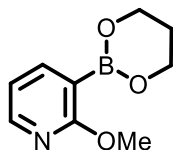

Following the **General Procedure 1D** using (2-methoxypyridin-3-yl)boronic acid (0.61 g, 4.0 mmol, 1.0 equiv), 1,3-propanediol (0.6 mL, 8.2 mmol, 2.0 equiv) at 80 °C for overnight. <sup>1</sup>H NMR (400 MHz, Chloroform-*d*) δ 8.19 (dd, *J* = 5.0, 2.2 Hz, 1H), 7.96 (dd, *J* = 7.1, 2.2 Hz, 1H), 6.85 (dd, *J* = 7.1, 5.0 Hz, 1H), 4.19 (t, *J* = 5.5 Hz, 4H), 3.97 (s, 3H), 2.08 (p, *J* = 5.5, 2H).

**Quinolin-3-ylboronic acid 1,3-propanediol ester:**

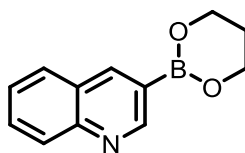

Following the **General Procedure 1D** using Quinolin-3-ylboronic acid (0.86 g, 4.0 mmol, 1.0 equiv), 1,3-propanediol (0.60 mL, 8.2 mmol, 2.0 equiv) at 80 °C for overnight. <sup>1</sup>H NMR (400 MHz, Chloroform-*d*) δ 9.18 (d, *J* = 1.8 Hz, 1H), 8.56 (d, *J* = 1.3 Hz, 1H), 8.10 (d, *J* = 7.5 Hz, 1H), 7.84 (dd, *J* = 8.1, 1.5 Hz, 1H), 7.73 (ddd, *J* = 8.5, 6.9, 1.5 Hz, 1H), 7.53 (ddd, *J* = 8.1, 6.8, 1.2 Hz, 1H), 4.24 (t, *J* = 5.5 Hz, 4H), 2.13 (p, *J* = 5.6 Hz, 2H).

**Isoquinolin-5-ylboronic acid 1,3-propanediol ester:**

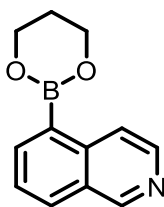

Following the **General Procedure 1D** using Isoquinolin-5-ylboronic acid (0.43 g, 2.0 mmol, 1.0 equiv), 1,3-propanediol (0.30 mL, 4.1 mmol, 2.0 equiv) at 80 °C for overnight. <sup>1</sup>H NMR (400 MHz, Chloroform-*d*) δ 9.22 (s, 1H), 8.58 (d, *J* = 6.1 Hz, 1H), 8.51 (d, *J* = 6.0 Hz, 1H), 8.23 (dd, *J* = 7.0, 1.4 Hz, 1H), 8.01 (d, *J* = 8.2 Hz, 1H), 7.58 (dd, *J* = 8.2, 7.0 Hz, 1H), 4.29 (t, *J* = 5.5 Hz, 4H), 2.16 (p, *J* = 5.5 Hz, 2H).

**Thiophen-3-ylboronic acid 1,3-propanediol ester:**

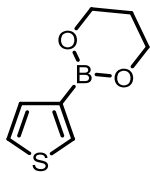

Following the **General Procedure 1D** using Thiophen-3-ylboronic acid (2.6 g, 20 mmol, 1.0 equiv), 1,3-propanediol (1.6 mL, 22 mmol, 1.1 equiv) at 80 °C for overnight.  $^1\text{H}$  NMR (400 MHz, Chloroform-*d*)  $\delta$  7.80 (d,  $J$  = 2.7 Hz, 1H), 7.35 (d,  $J$  = 4.8 Hz, 1H), 7.30 (dd,  $J$  = 5.0, 2.7 Hz, 1H), 4.14 (t,  $J$  = 5.5 Hz, 4H), 2.05 (p,  $J$  = 5.5 Hz, 2H).

**Pyrimidin-3-ylboronic acid 1,3-propanediol ester:**

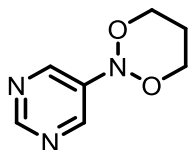

Following the **General Procedure 1D** using Pyrimidin-3-ylboronic acid (0.62 g, 5.0 mmol, 1.0 equiv), 1,3-propanediol (0.70 mL, 10 mmol, 2.0 equiv) at 80 °C for overnight.  $^1\text{H}$  NMR (400 MHz, Chloroform-*d*)  $\delta$  9.23 (s, 1H), 8.96 (s, 2H), 4.19 (t,  $J$  = 5.5 Hz, 4H), 2.10 (p,  $J$  = 5.5 Hz, 2H).

**1-Methyl-1H-indazol-5-ylboronic acid 1,3-propanediol ester:**

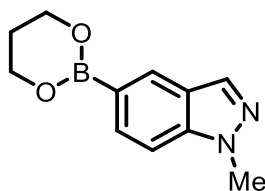

Following the **General Procedure 1D** using 1-Methyl-1H-indazol-5-ylboronic acid (0.52 g, 3.0 mmol, 1.0 equiv), 1,3-propanediol (0.4 mL, 6.0 mmol, 2.0 equiv) at 80 °C for overnight.  $^1\text{H}$  NMR (400 MHz, Chloroform-*d*)  $\delta$  8.21 (s, 1H), 7.98 (s, 1H), 7.78 (dd,  $J$  = 8.5, 1.1 Hz, 1H), 7.35 (dd,  $J$  = 8.5, 1.0 Hz, 1H), 4.20 (t,  $J$  = 5.5 Hz, 4H), 4.07 (s, 3H), 2.09 (p,  $J$  = 5.5 Hz, 2H).

**2-(4-Nitrophenyl)-1,3,2-dioxaborinane:**

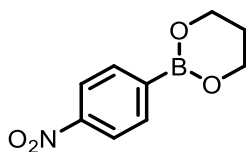

Following the **General Procedure 1D** using (4-nitrophenyl)boronic acid (1.0 g, 6.0 mmol, 1.0 equiv), 1,3-propanediol (0.48 mL, 7.2 mmol, 1.2 equiv) at 80 °C for overnight. <sup>1</sup>H NMR (400 MHz, DMSO-*d*<sub>6</sub>) δ 8.17 (d, *J* = 8.2 Hz, 2H), 7.88 (d, *J* = 8.2 Hz, 2H), 4.14 (t, *J* = 5.4 Hz, 4H), 2.03 (p, *J* = 5.4 Hz, 2H).

**4-Cyanophenylboronic acid 2,2-dimethyl-1,3-propanediol ester:**

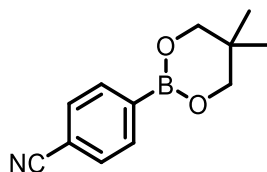

Following the **General Procedure 1D** using 4-Cyanophenylboronic acid (0.73 g, 5.0 mmol, 1.0 equiv), 2,2-dimethyl-1,3-propanediol (0.7 mL, 10.0 mmol, 2.0 equiv) at 80 °C for overnight. <sup>1</sup>H NMR (400 MHz, Chloroform-*d*) δ 7.87 (d, *J* = 7.6 Hz, 2H), 7.62 (d, *J* = 7.7 Hz, 2H), 3.78 (s, 4H), 1.03 (s, 6H).

**Synthesis of ((8R,9S,13S,14S)-13-methyl-17-oxo-7,8,9,11,12,13,14,15,16,17-decahydro-6H-cyclopenta[*a*]phenanthren-3-yl)boronic acid (19a):**

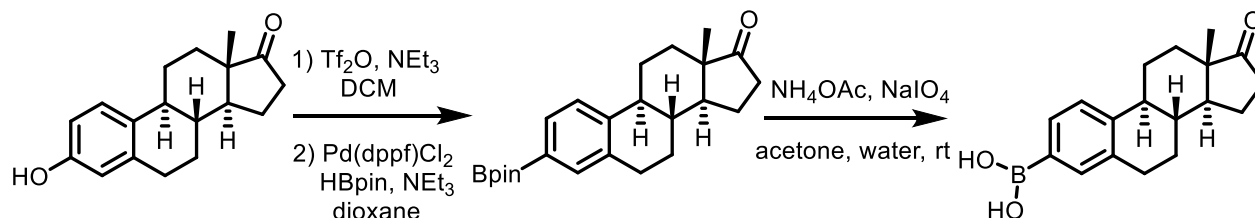

To a solution of estrone (1.0 g, 3.7 mmol) and triethylamine (1.0 mL, 7.4 mmol) in DCM (20 mL) was added Tf<sub>2</sub>O (0.7 mL, 4.1 mmol) at 0 °C. The reaction mixture was stirred at same temperature for 1h, then warmed to room temperature and stirred overnight. After completion, the reaction was washed with NaHCO<sub>3</sub> (20 mL). The aqueous phase was extracted with DCM (2 x 20 mL), and the combined organic phase was washed brine (40 mL), dried over Na<sub>2</sub>SO<sub>4</sub>, and concentrated. The residue was purified by flash column chromatography (Hex: EA =10:1) on silica to give 3-(trifluoromethanesulfonyl)estrone as a white solid (1.3 g, 90%). A portion of this product (1.0 g, 2.5 mmol) was added to a sealed tube containing Pd(dppf)Cl<sub>2</sub> (122 mg, 0.15 mmol), triethylamine (2.1 mL, 6.0 equiv), dioxane (10 mL), followed by 4,4,5,5-tetramethyl-1,3,2-dioxaborolane (1.2 mL, 7.2 mmol). The reaction mixture was then heated to 100 °C and stirred for 24 h. The reaction mixture was cooled to room temperature and filtered through a pad of cellite. The filtrate was concentrated and purified by flash column chromatography (Hex: EA =10:1) on silica to

give 3-deoxyestrone-3-boronic acid pinacol ester (0.70 g, 74%) as a white solid.  $^1\text{H NMR}$  (400 MHz, Chloroform-*d*)  $\delta$  7.62 – 7.53 (m, 2H), 7.31 (d,  $J = 7.8$  Hz, 1H), 2.93 (dt,  $J = 6.8, 4.3$  Hz, 2H), 2.57 – 2.40 (m, 2H), 2.33 (td,  $J = 10.8, 4.2$  Hz, 1H), 2.19 – 1.89 (m, 4H), 1.73 – 1.39 (m, 6H), 1.34 (s, 12H), 0.90 (s, 3H).

To a solution of 3-deoxyestrone-3-boronic acid pinacol ester (0.70 g, 1.8 mmol) in acetone (15 mL) and water (10 mL),  $\text{NH}_4\text{OAc}$  (0.82 g, 11 mmol) and  $\text{NaIO}_4$  (2.4 g, 11 mmol) were added. The resulting reaction mixture was stirred at room temperature for 48 h. When completed, the reaction was diluted with  $\text{Et}_2\text{O}$  and filtered through a pad of celite. The filtrate was concentrated and purified by flash column chromatography (Hex: EA = 10:1) to afford aryl boronic acid **19a** (307 mg, 56%) as a white solid.  $^1\text{H NMR}$  (400 MHz, Chloroform-*d*)  $\delta$  7.15 (d,  $J = 8.4$  Hz, 1H), 6.64 (dd,  $J = 8.4, 2.8$  Hz, 1H), 6.58 (d,  $J = 2.7$  Hz, 1H), 2.93 – 2.81 (m, 2H), 2.51 – 2.33 (m, 2H), 2.28 – 2.19 (m, 1H), 2.19 – 1.90 (m, 4H), 1.67 – 1.36 (m, 6H), 0.91 (s, 3H).

#### Synthesis of (4-(6-methoxybenzo[*d*]thiazol-2-yl)phenyl)boronic acid (**20a**):

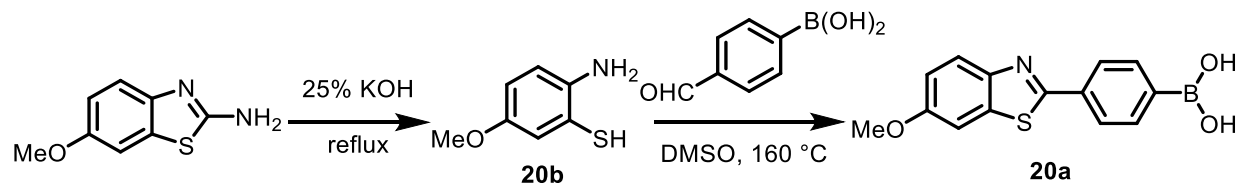

To a solution of 25% potassium hydroxide (7.50 g KOH in 22.5 mL pure water) in 100 mL round-bottomed flask, 2-amino-methoxybenzothiazole (6.0 g, 33 mmol) was added. The suspension was heated to reflux for 24 h. After cooling down to room temperature, the pale yellow solution was acidified to pH=6 with aqueous 6N HCl then acetic acid. The precipitated solid was filtered and purified by flash column chromatography (Hex: EA=15:1) on silica to afford the desired product **20b** as a yellow solid (4.6 g, 88%).  $^1\text{H NMR}$  (400 MHz, Chloroform-*d*)  $\delta$  6.80 (dd,  $J = 8.7, 3.0$  Hz, 1H), 6.73 – 6.63 (m, 2H), 4.12 – 3.98 (m, 2H), 3.61 (s, 3H).

To a sealed tube charged with nitrogen were added **20b** (0.78 mg, 5.0 mmol) and 4-Formylphenylboronic acid (0.75 mg, 5.0 mmol) followed by DMSO (30 mL). The suspension was heated to 160 °C and stirred for 2 h. After completion of the reaction, the mixture was poured into ice water to precipitate the product, which was collected by suction filtration and washed with a sparing amount of dichloromethane to afford desired product (4-(6-methoxybenzo[*d*]thiazol-2-yl)phenyl)boronic acid **20a** (1.4 g, 99%) as a solid.  $^1\text{H NMR}$  (400 MHz, DMSO-*d*<sub>6</sub>)  $\delta$  8.23 (s, 2H), 8.00 (d,  $J = 8.2$  Hz, 2H), 7.97 – 7.89 (m, 3H), 7.73 (d,  $J = 2.6$  Hz, 1H), 7.14 (dd,  $J = 8.9, 2.6$  Hz, 1H), 3.86 (s, 3H).

#### Synthesis of (4-(5-(*p*-tolyl)-3-(trifluoromethyl)-1*H*-pyrazol-1-yl)phenyl)boronic acid (**21a**):



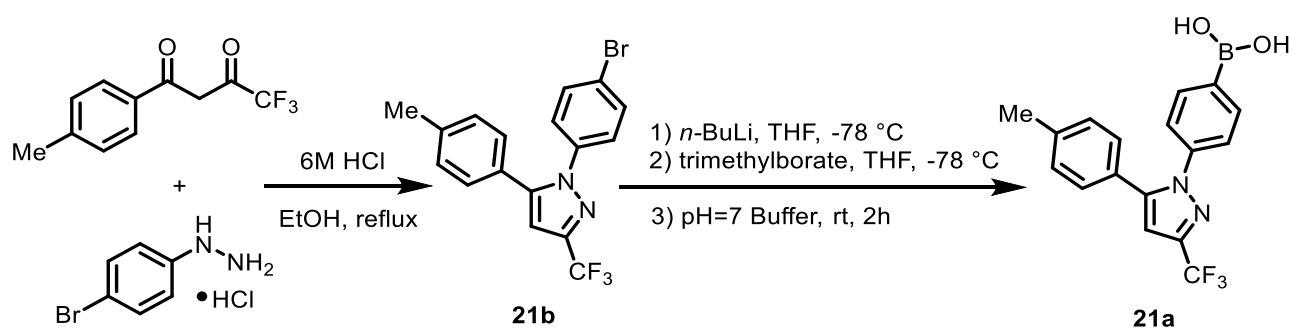

To a 100 mL round-bottomed flask charged with nitrogen and equipped with a magnetic stir bar were added 4,4,4-trifluoro-1-(*p*-tolyl)butane-1,3-dione (2.37 g, 10.3 mmol), (4-bromophenyl)hydrazine hydrochloride (2.24 g, 10.0 mmol), ethanol (20 mL) and 6N HCl (3.4 mL, 20 mmol). The reaction vessel was heated to reflux and stirred for 12 h. After cooling to room temperature, the reaction mixture was diluted with EA (40 mL) and washed with 30 mL saturated K<sub>2</sub>CO<sub>3</sub>, followed by 30 mL saturated brine. Then the combined organic layer was dried over Na<sub>2</sub>SO<sub>4</sub>, filtered and concentrated *in vacuo*. The residue was purified by flash column chromatography on silica gel (Hex: EA =10:1) to afford **21b** as a white solid (3.5 g, 92%). <sup>1</sup>H NMR (400 MHz, Chloroform-*d*) δ 7.50 – 7.43 (m, 2H), 7.25 – 7.09 (m, 6H), 6.74 (s, 1H), 2.38 (s, 3H).

To a 25 mL round-bottomed flask equipped with a magnetic stir bar were added 1-(4-bromophenyl)-5-(*p*-tolyl)-3-(trifluoromethyl)-1*H*-pyrazole (0.76 g, 2.0 mmol), THF (5.6 mL) under an atmosphere of nitrogen and cooled to -78°C. A solution of *n*-BuLi (0.88 mL, 2.2 mmol) in hexane (2.5 M) was added dropwise. At this temperature, the suspension was stirred for 15 min. Neat triisopropylborate (0.8 mL, 3.0 mmol) was added dropwise. The resulting solution was stirred at -78°C for further 5 min then warmed to room temperature and stirred for another 1 h. Next, aqueous buffer (pH=7, 1.0 vol) was added and the biphasic mixture was stirred vigorously for 2 h. The reaction mixture was partitioned between water and ethyl acetate, the phases were separated, and the aqueous phase was extracted with EA (3 x 20 mL). The combined organic phases were washed with brine (20 mL) and then dried over Na<sub>2</sub>SO<sub>4</sub>. Removal of all volatiles *in vacuo* gave the crude product a white solid, which could be purified by flash column chromatography on silica gel (Hex:EA = 4:1) to afford pure product **21a** as a white solid. <sup>1</sup>H NMR (400 MHz, DMSO-*d*<sub>6</sub>) δ 8.23 (s, 2H), 7.83 (d, *J* = 8.2 Hz, 2H), 7.29 (d, *J* = 8.1 Hz, 2H), 7.21 – 7.11 (m, 5H), 2.30 (s, 3H).

**Synthesis of (S)-4-(2-((*tert*-butoxycarbonyl)amino)-3-methoxy-3-oxopropyl)phenyl)boronic acid (**22a**):**

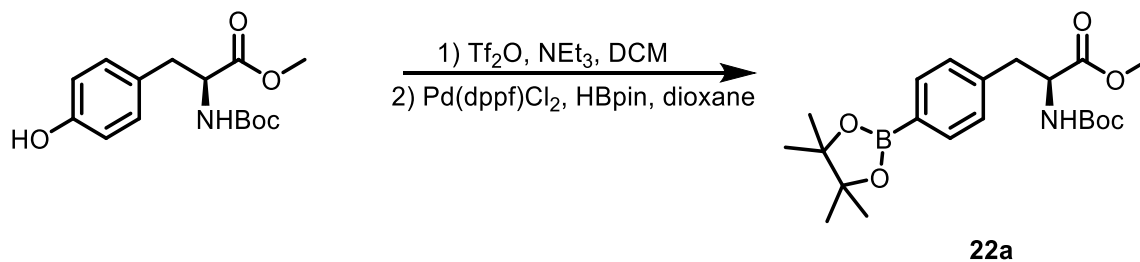

To a solution of Boc-Tyr-OMe (5.0 g, 17 mmol) and NEt<sub>3</sub> (4.7 mL, 34 mmol) in DCM (50 mL) was added Tf<sub>2</sub>O (3.3 mL, 19 mmol) at 0°C. The reaction mixture was stirred at same temperature for 1 h, then warmed to room temperature and stirred overnight. After completion, the reaction was washed with NaHCO<sub>3</sub> (50 mL). The aqueous phase was extracted with DCM (2 x 50 mL), and the combined organic phase was washed brine (50 mL), dried over Na<sub>2</sub>SO<sub>4</sub>, and concentrated. The residue was purified by flash column chromatography (Hex: EA =10:1) on silica to give trifluoromethanesulfonic ester (5.1 g, 70%) as a yellow oil. <sup>1</sup>H NMR (400 MHz, Chloroform-*d*) δ 7.25 – 7.17 (m, 4H), 5.01 (d, *J* = 8.2 Hz, 1H), 4.60 (q, *J* = 6.9 Hz, 1H), 3.71 (s, 3H), 3.10 (ddd, *J* = 53.2, 13.9, 6.1 Hz, 2H), 1.41 (s, 9H).

To a sealed tube were added trifluoromethanesulfonic ester (2.5 g, 5.8 mmol), Pd(dppf)Cl<sub>2</sub> (0.22 g, 0.3 mmol), 4-methylmorpholine (1.8 mL, 1.5 equiv), dioxane (20 mL), followed by 4,4,5,5-tetramethyl-1,3,2-dioxaborolane (2.6 mL, 18 mmol). The reaction mixture was then heated to 80°C and stirred for 24 h. The reaction mixture was cooled to room temperature and filtered through a pad of cellite. The filtrate was concentrated and purified by flash column chromatography (Hex: EA =10:1) on silica to give **22b** (1.51 g, 63%) as a colorless oil. <sup>1</sup>H NMR (400 MHz, Chloroform-*d*) δ 7.73 (d, *J* = 7.6 Hz, 2H), 7.12 (d, *J* = 7.6 Hz, 2H), 4.94 (d, *J* = 8.2 Hz, 1H), 4.58 (q, *J* = 6.6 Hz, 1H), 3.70 (s, 3H), 3.11 (tt, *J* = 13.8, 6.9 Hz, 2H), 1.42 (s, 9H), 1.34 (s, 12H).

## IV. Mechanistic Experiments

### A. *In Situ* Spectroscopic Investigations

*In situ* NMR observation of the catalytic reaction: To a glass culture tube described in the General Methods section was added a small stir bar, 4-bromophenylboronic acid (208 mg, 1.00 mmol, 1.0 equiv), phosphetane oxide precatalyst **1**•[O] (26 mg, 15 mol%). The tube thread was wrapped once with Teflon tape and a phenolic screw-thread open-top cap fitted with a PTFE-lined silicone septum (Thermo Scientific) was screwed on. No special drying of the reaction vessel components was conducted prior. Following evacuation and the introduction of nitrogen on a Schlenk line, dry *cyclopentyl methyl ether* (0.5 M) was added via syringe from a sure-seal® bottle. Lastly, phenylsilane (246  $\mu$ L, 2.00 mmol, 2.0 equiv) and *d*<sub>3</sub>-nitromethane (162  $\mu$ L, 3.0 mmol, 3.0 equiv) were added and the reaction mixture was stirred at 120 °C for 12 h. For every time point, a 50  $\mu$ L aliquot of the diluted reaction mixture was then added to a screwed NMR tube containing 0.4 mL of DCM. The <sup>2</sup>H (ppm calibrated relative to *d*-DCM(*l*) internal standard) and <sup>31</sup>P NMR spectra (ppm are relative to 85% H<sub>3</sub>PO<sub>4</sub> external standard) were collected at 0 h, 4 h, 9 h and 12 h.

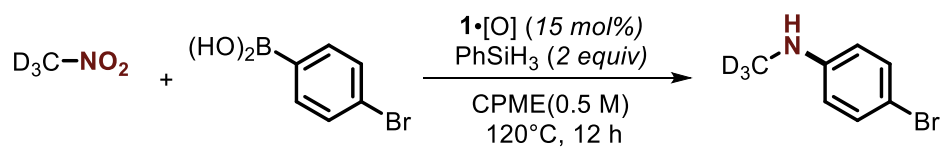

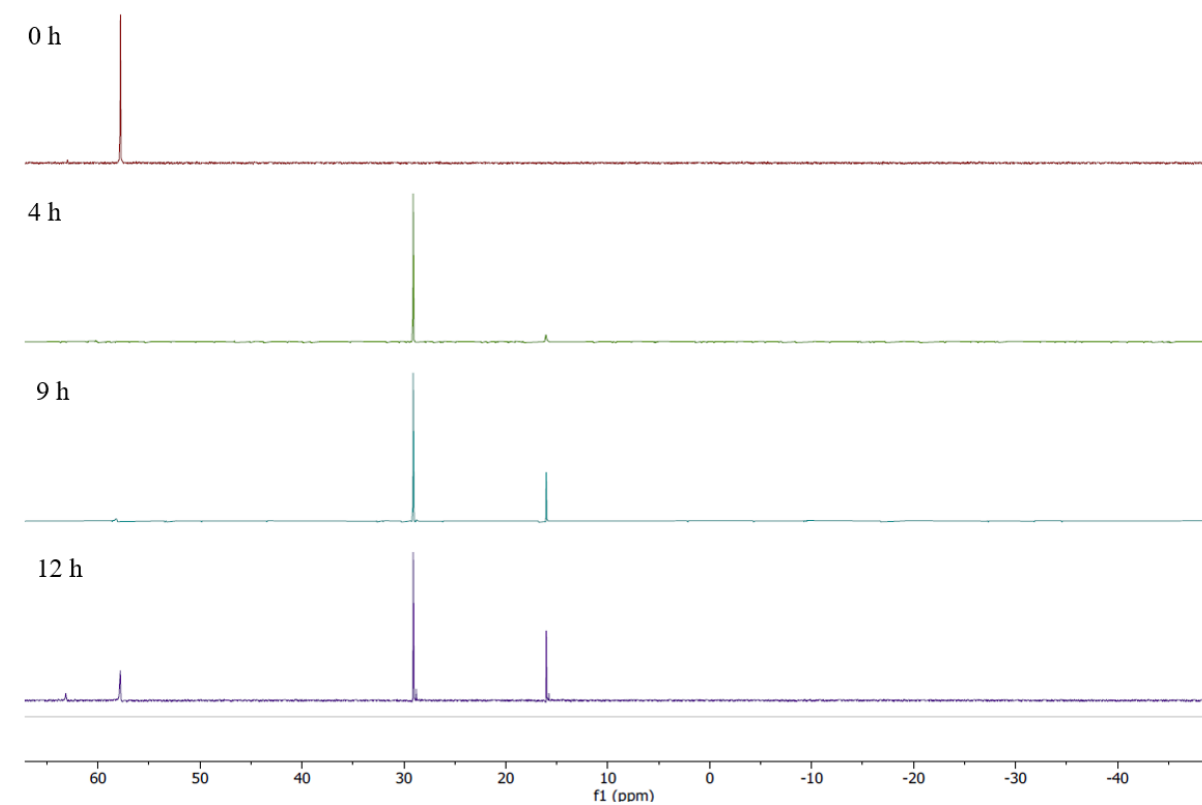

**Figure S1.** Time-stacked in situ  $^{31}\text{P}$  NMR spectra ( $T = 25\text{ }^\circ\text{C}$ ,  $\text{CH}_2\text{Cl}_2$ ) at  $t = 0\text{ h}$ ,  $4\text{ h}$ ,  $9\text{ h}$  and  $12\text{ h}$ . Chemical shifts:  $\mathbf{1}\cdot[\text{O}]$ ,  $\delta\ 57.8$  (*anti*) and  $62.3$  (*syn*) ppm;  $\mathbf{1}$ ,  $\delta\ 29.1$  (*anti*) and  $16.0$  (*syn*) ppm. Units of chemical shift ( $\delta$ ) are ppm relative to 85%  $\text{H}_3\text{PO}_4$  as an external standard.

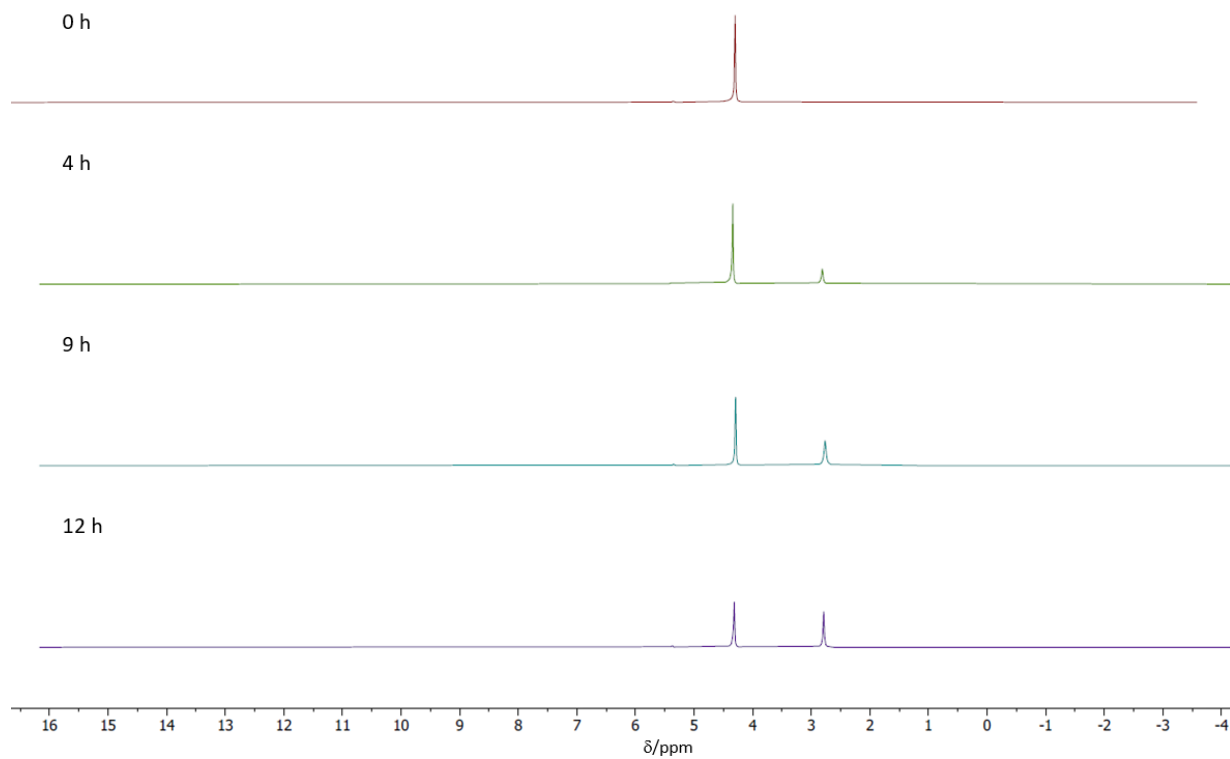

**Figure S2.** Time-stacked in situ  $^2\text{H}$  NMR spectra ( $T = 25\text{ }^\circ\text{C}$ , dichloromethane) at  $t = 0\text{ h}$ ,  $4\text{ h}$ ,  $9\text{ h}$  and  $12\text{ h}$ . Chemical shifts:  $d_3$ -nitromethane,  $\delta$  4.32 ppm; 4-bromo- $N$ -(methyl- $d_3$ )aniline,  $\delta$  2.79 ppm. Units of chemical shift ( $\delta$ ) are ppm relative to  $d_2$ -dichloromethane as an internal standard.

**B. Control reactions with formaldoxime trimer**

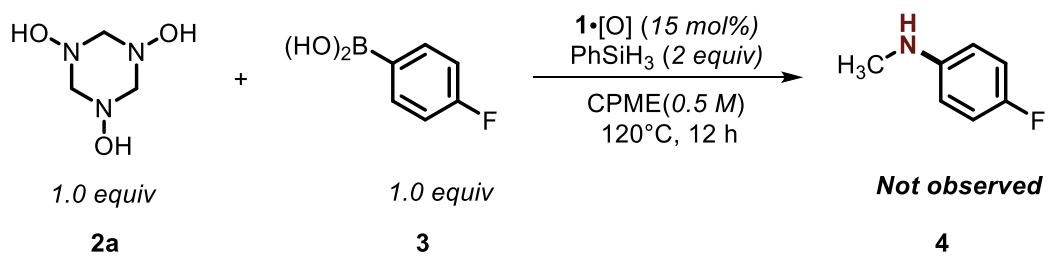

**Figure S3.** Control reactions with formaldoxime trimer instead of nitromethane as the starting material under the standard conditions.

## V. Specialized Applications and Examples

### A. Isotopic labelling from H<sub>3</sub>C–NO<sub>2</sub> isotopologues

#### a. 4-Bromo-*N*-(methyl-*d*<sub>3</sub>)aniline synthesis (**5b**):

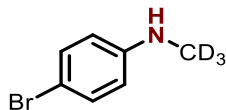

Following the **General Procedure 1C** using 4-bromophenylboronic acid (104 mg, 0.50 mmol, 1.0 equiv), phenylsilane (123  $\mu$ L, 1.00 mmol, 2.0 equiv) and nitromethane-*d*<sub>3</sub> (81.0  $\mu$ L, 1.50 mmol, 3.0 equiv) for 24 h at 120 °C. The product was purified by flash column chromatography with Hex:EA=19:1 on silica gel (84 mg, 88%). <sup>1</sup>H NMR (400 MHz, Chloroform-*d*)  $\delta$  7.30 – 7.22 (m, 2H), 6.53 – 6.42 (m, 2H), 3.70 (s, 1H), 2.77 (s, 0.06H, 98% D). <sup>2</sup>H NMR (61 MHz, Chloroform-*d*)  $\delta$  2.79 (s, 3D). <sup>13</sup>C NMR (101 MHz, Chloroform-*d*)  $\delta$  148.4, 132.0, 114.1, 108.9.<sup>2</sup> HRMS (ESI) calculated for C<sub>7</sub>H<sub>9</sub>BrN [M+H]<sup>+</sup>: 189.0101; Found: 189.0102.

#### b. 4-bromo-*N*-(methyl-<sup>13</sup>C)aniline synthesis (**5c**):

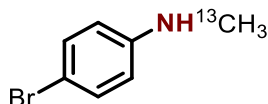

Following the **General Procedure 1C** using 4-bromophenylboronic acid (104 mg, 0.50 mmol, 1.0 equiv), phenylsilane (123  $\mu$ L, 1.00 mmol, 2.0 equiv) and nitromethane-<sup>13</sup>C (81.0  $\mu$ L, 1.50 mmol, 3.0 equiv) for 24 h at 120 °C. The product was purified by flash column chromatography with Hex:EA=19:1 on silica gel (86 mg, 92%). <sup>1</sup>H NMR (400 MHz, Chloroform-*d*)  $\delta$  7.35 – 7.18 (m, 2H), 6.58 – 6.35 (m, 2H), 3.82 (s, 1H), 2.79 (d, *J* = 135.7 Hz, 3H). <sup>13</sup>C NMR (101 MHz, Chloroform-*d*)  $\delta$  148.1, 131.8, 114.0 (d, *J* = 3.4 Hz), 108.9, 30.7. HRMS (DART) calculated for C<sub>6</sub>[<sup>13</sup>C]H<sub>9</sub>BrN [M+H]<sup>+</sup>: 186.9946; Found: 186.9949, 98% [<sup>13</sup>C]

#### c. 4-Bromo-*N*-methylaniline-<sup>15</sup>N synthesis (**5d**):

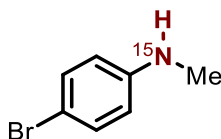

Following the **General Procedure 1C** using 4-Bromophenylboronic acid (41 mg, 0.20 mmol, 1.0 equiv), phenylsilane (50  $\mu$ L, 0.40 mmol, 2.0 equiv) and (nitro-<sup>15</sup>N)methane (32  $\mu$ L, 0.60 mmol, 3.0 equiv) for 24 h at 120 °C. The product was purified by flash column chromatography with Hex:EA=19:1 on silica

gel (34 mg, 91%).  $^1\text{H}$  NMR (400 MHz, Chloroform-*d*)  $\delta$  7.36 – 7.19 (m, 2H), 6.59 – 6.41 (m, 2H), 3.93 (s, 1H), 2.81 (s, 3H).  $^{13}\text{C}$  NMR (101 MHz, Chloroform-*d*)  $\delta$  147.9 (d,  $J = 21.6$  Hz), 131.9 (d,  $J = 1.6$  Hz), 114.2 (d,  $J = 2.8$  Hz), 109.2, 30.9 (d,  $J = 9.8$  Hz).  $^{15}\text{N}$  NMR (41 MHz, Chloroform-*d*)  $\delta$  52.4. HRMS (DAR) calculated for  $\text{C}_7\text{H}_9\text{Br}[^{15}\text{N}]$   $[\text{M}+\text{H}]^+$ : 186.9883; Found: 186.9873. 99% $^{15}\text{N}$



## B. (nitro-<sup>15</sup>N)methane Preparation

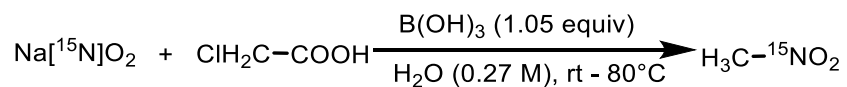

Preparation followed a modification of a reported procedure:<sup>3</sup> To a stirred mixture of chloroacetic acid (1.6 g, 14 mmol, 1.4 equiv) and cracked ice (25 g) was added cold 1 M NaOH just enough to make the solution alkaline to phenolphthalein. The solution was mixed with <sup>15</sup>NO<sub>2</sub>Na (0.70 g, 10 mmol) in H<sub>2</sub>O (10 mL) and with boric acid (0.65 g, 1.05 equiv). The reaction mixture was heated until bubbles of carbon dioxide appeared (around 60 °C) and held at this temperature for 4 h. The reaction temperature was then increased to 80 °C and held for an additional 2 h. Nitromethane and H<sub>2</sub>O were then distilled and nitromethane was extracted with diethyl ether (2 x 10 mL) and dried with Na<sub>2</sub>SO<sub>4</sub>. Careful distillation of the crude mixture gave the pure product (nitro-<sup>15</sup>N)methane (0.20 g, 32%). <sup>1</sup>H NMR (400 MHz, Chloroform-*d*) δ 4.32 (s, 3H). <sup>13</sup>C NMR (101 MHz, Chloroform-*d*) δ 62.4 (d, *J* = 10.1 Hz). <sup>15</sup>N NMR (41 MHz, Chloroform-*d*) δ 383.0.

$\text{CH}_3[^{15}\text{N}]\text{O}_2$   $^1\text{H}$  NMR

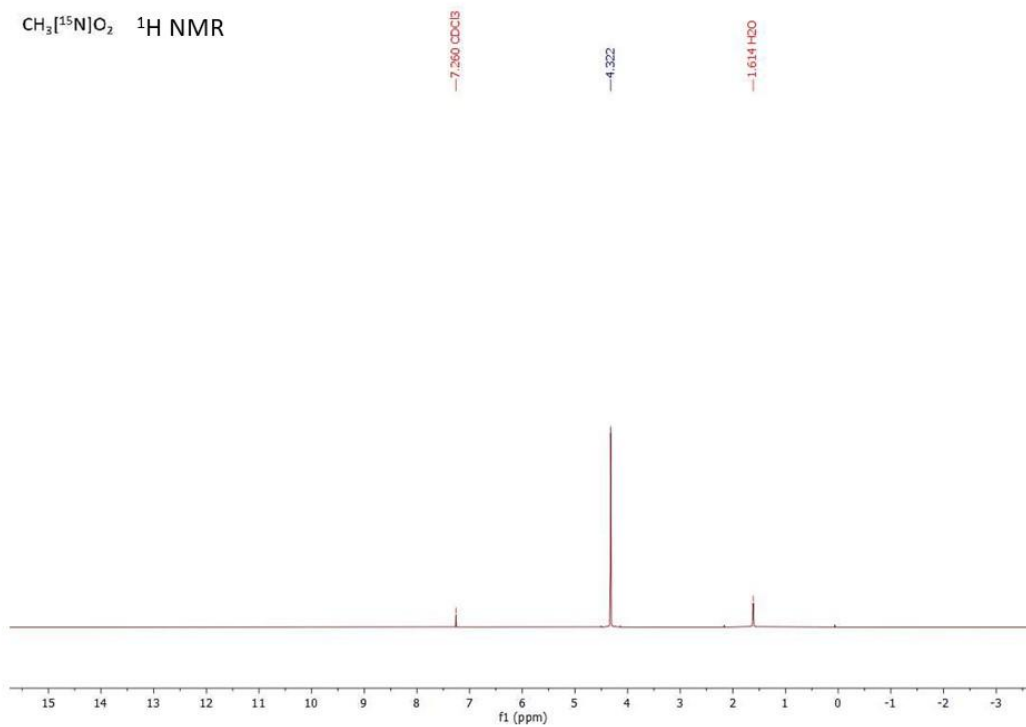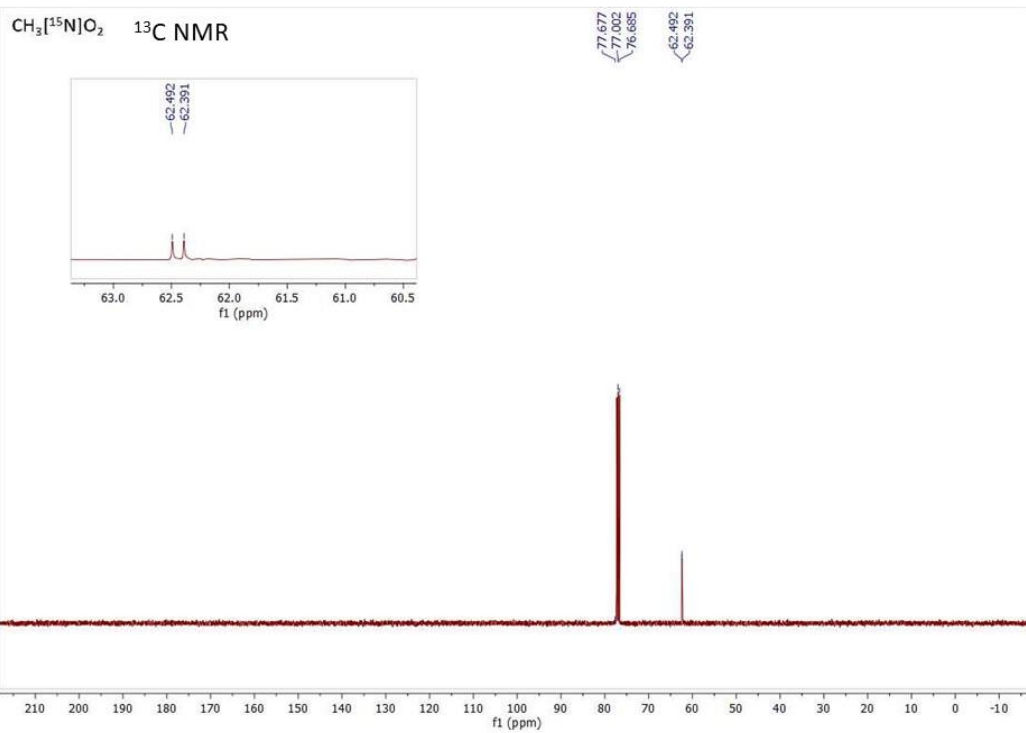

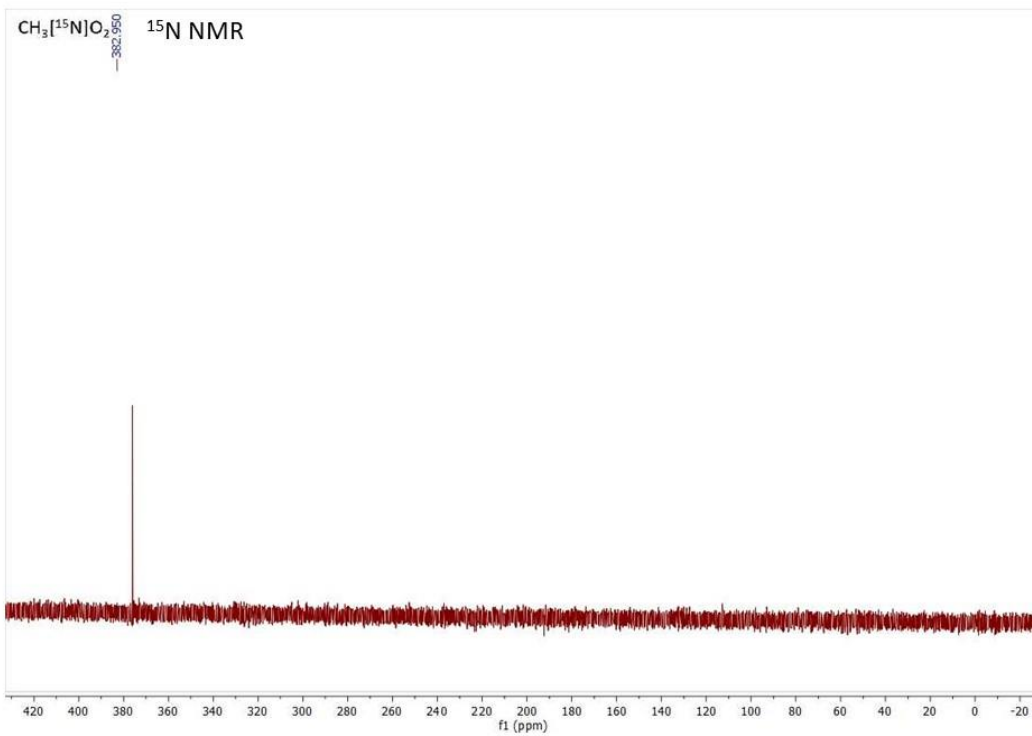

C. Reactivity comparison for (MeNO<sub>2</sub> vs ArNO<sub>2</sub>) and (ArB(OH)<sub>2</sub> vs ArBpin).

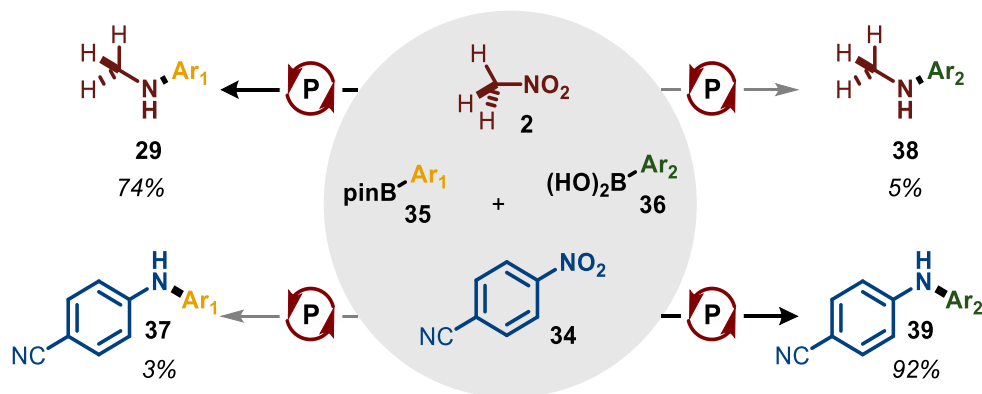

To a glass culture tube described in the General Methods section was added a small stir bar, 3,5-ditri-fluoromethylphenylboronic acid pinacol ester (87 mg, 0.25 mmol, 1.0 equiv), 4-methoxyphenylboronic acid (38 mg, 0.25 mmol, 1.0 equiv), 4-nitrobenzonitrile (37 mg, 0.25 mmol, 1.0 equiv) and phosphetane oxide precatalyst **1**•[O] (13 mg, 0.075 mmol%, 30 mol%). The tube thread was wrapped once with Teflon tape and a phenolic screw-thread open-top cap fitted with a PTFE-lined silicone septum (Thermo Scientific) was screwed on. No special drying of the reaction vessel components was conducted prior. Following evacuation and the introduction of nitrogen on a Schlenk line, dry *cyclopentyl methyl ether* (1.0 mL, 0.25 M) was added via syringe from a sure-seal<sup>®</sup> bottle. Lastly, phenylsilane (123  $\mu$ L, 1.00 mmol, 4.0 equiv) and nitromethane (41.0  $\mu$ L, 0.75 mmol, 3.0 equiv) were added and the reaction mixture was stirred at 120 °C for 12 h. Upon completion, the yield of 4-((3,5-bis(trifluoromethyl)phenyl)amino)benzonitrile **37** was determined by <sup>19</sup>F NMR with trifluorotoluene as the internal standard, and the yield of 4-methoxy-*N*-methylaniline **38** was determined by <sup>1</sup>H NMR with dibromomethane as the internal standard. The crude mixture was purified directly by flash column chromatography with Hex:EA=10:1 on silica gel to obtain *N*-methyl-3,5-bis(trifluoromethyl)aniline **29** (45 mg, 74%) and 4-((4-methoxyphenyl)amino)benzonitrile **39** (52 mg, 92%), <sup>1</sup>H NMR (400 MHz, Chloroform-*d*)  $\delta$  7.41 (d, *J* = 8.8 Hz, 2H), 7.12 (d, *J* = 8.8 Hz, 2H), 6.91 (d, *J* = 8.8 Hz, 2H), 6.79 (d, *J* = 8.8 Hz, 2H), 6.01 (br s, 1H), 3.82 (s, 3H). <sup>13</sup>C NMR (101 MHz, Chloroform-*d*)  $\delta$  157.0, 149.8, 133.7, 132.6, 125.0, 120.3, 114.9, 113.8, 100.0, 55.6. HRMS (ESI) calculated for C<sub>14</sub>H<sub>13</sub>N<sub>2</sub>O [M+H]<sup>+</sup>: 225.1028; Found: 225.1031.

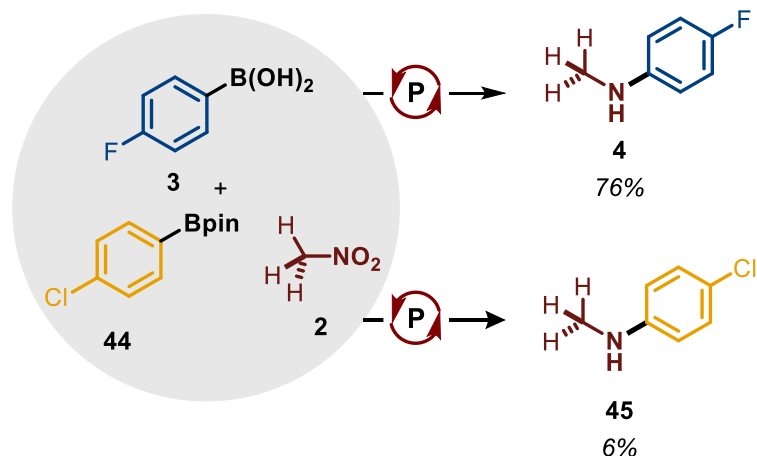

To a glass culture tube described in the General Methods section was added a small stir bar, 4-chlorophenylboronic acid pinacol ester (60 mg, 0.25 mmol, 1.0 equiv), 4-fluorophenylboronic acid (35 mg, 0.25 mmol, 1.0 equiv) and phosphetane oxide precatalyst **1**•[O] (6.5 mg, 0.0375 mmol%, 15 mol%). The tube thread was wrapped once with Teflon tape and a phenolic screw-thread open-top cap fitted with a PTFE-lined silicone septum (Thermo Scientific) was screwed on. No special drying of the reaction vessel components was conducted prior. Following evacuation and the introduction of nitrogen on a Schlenk line, dry cyclopentyl methyl ether (0.5 mL, 0.5 M) was added via syringe from a sure-seal® bottle. Lastly, phenylsilane (62  $\mu$ L, 0.50 mmol, 2.0 equiv) and nitromethane (41.0  $\mu$ L, 0.75 mmol, 3.0 equiv) were added and the reaction mixture was stirred at 120  $^{\circ}$ C for 8 h. NMR yield of 4-fluoro-*N*-methylaniline **4** (76%) was obtained by  $^{19}\text{F}$  NMR with 4-fluorotoluene as the internal standard, and the NMR yield of 4-chloro-*N*-methylaniline **45** was determined by  $^1\text{H}$  NMR with dibromomethane as the internal standard.

D. Benzene-1,4-diamine synthesis from a three-component reaction.

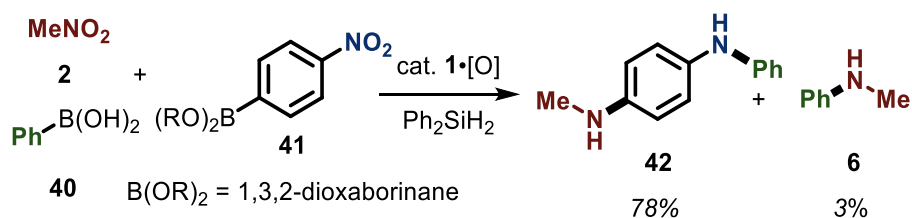

To a glass culture tube described in the General Methods section was added a small stir bar, 2-(4-nitrophenyl)-1,3,2-dioxaborinane (103 mg, 0.50 mmol, 1.0 equiv), phenylboronic acid (61 mg, 0.50 mmol, 1.0 equiv) and phosphetane oxide precatalyst **1•[O]** (18 mg, 0.10 mmol, 20 mol%). The tube thread was wrapped once with Teflon tape and a phenolic screw-thread open-top cap fitted with a PTFE-lined silicone septum (Thermo Scientific) was screwed on. No special drying of the reaction vessel components was conducted prior. Following evacuation and the introduction of nitrogen on a Schlenk line, dry *cyclopentyl methyl ether* (0.5 M) was added via syringe from a sure-seal<sup>®</sup> bottle. Lastly, diphenylsilane (557  $\mu$ L, 3.00 mmol, 6.0 equiv) and nitromethane (81.0  $\mu$ L, 1.50 mmol, 3.0 equiv) were added and the reaction mixture was stirred at 120 °C for 12 h. Upon completion, the yield of *N*-methylaniline **6** was determined by <sup>1</sup>H NMR with dibromomethane as the internal standard. The crude mixture was purified directly by flash column chromatography with Hex:EA=10:1 on silica gel to obtain product **42** (77 mg, 78%). <sup>1</sup>H NMR (400 MHz, DMSO-*d*<sub>6</sub>)  $\delta$  7.48 (s, 1H), 7.08 (dd, *J* = 8.4, 7.1 Hz, 2H), 6.94 – 6.86 (m, 2H), 6.77 (d, *J* = 8.0 Hz, 2H), 6.60 (t, *J* = 7.3 Hz, 1H), 6.54 – 6.46 (m, 2H), 5.34 (s, 1H), 2.65 (s, 3H). <sup>13</sup>C NMR (101 MHz, DMSO-*d*<sub>6</sub>)  $\delta$  146.7, 145.6, 131.4, 128.9, 122.6, 117.0, 113.6, 112.4, 30.2. HRMS (ESI) calculated for C<sub>13</sub>H<sub>15</sub>N<sub>2</sub> [M+H]<sup>+</sup>: 199.1230; Found: 199.1230.

E. Target molecule synthesis: Triflubazam (anxiolytic, anti-obsessive efficacy).

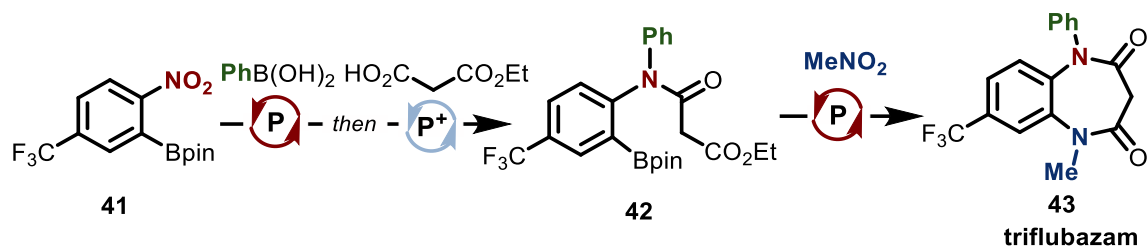

To a glass culture tube described in the General Methods section was added a small stir bar, compound **41** (79 mg, 0.25 mmol, 1.0 equiv), phenylboronic acid (34 mg, 0.28 mmol, 1.1 equiv) and phosphatane oxide precatalyst **1**•[O] (13 mg, 0.08 mmol, 30 mol%). The tube thread was wrapped once with Teflon tape and a phenolic screw-thread open-top cap fitted with a PTFE-lined silicone septum (Thermo Scientific) was screwed on. No special drying of the reaction vessel components was conducted prior. Following evacuation and the introduction of nitrogen on a Schlenk line, dry *cyclopentyl methyl ether* (0.5 mL, 0.5 M) was added via syringe from a sure-seal<sup>®</sup> bottle. Lastly, diphenylsilane (186  $\mu$ L, 1.0 mmol, 4.0 equiv) was added and the reaction mixture was stirred at 120 °C. After 2 h, the reaction mixture was cooled to 80 °C and diethyl (methyl)bromomalonate (72  $\mu$ L, 0.375 mmol, 1.5 equiv) and hydrogen ethyl malonate (34  $\mu$ L, 0.30 mmol, 1.2 equiv) were added. After 10 min, the reaction mixture was moved to another oil bath at 40 °C and the reaction mixture was stirred for 24 h. Upon completion, the reaction vessel screw cap was unscrewed (note that in some cases pressure release was observed) and 10 mL of distilled water was added. With the aid of DCM, the reaction mixture was transferred to a separatory funnel. After mixing and separating the aqueous layer, the organic layer was washed with 10 mL of a 1 M NaOH aqueous solution, and 10 mL of brine. Each aqueous phase was back-extracted with 10 mL portions of DCM. The combined organic layers were dried over anhydrous sodium sulfate, filtered and concentrated with aid of a rotary evaporator to obtain the crude product, which was advanced without further purification to the next step.

To a glass culture tube described in the General Methods section was added a small stir bar, phosphatane oxide precatalyst **1**•[O] (6.5 mg, 0.04 mmol, 15 mol%). The tube thread was wrapped once with Teflon tape and a phenolic screw-thread open-top cap fitted with a PTFE-lined silicone septum (Thermo Scientific) was screwed on. No special drying of the reaction vessel components was conducted prior. Following evacuation and the introduction of nitrogen on a Schlenk line, a solution of crude mixture from the first step in dry *cyclopentyl methyl ether* (1.0 mL, 0.25 M) from a sure-seal<sup>®</sup> bottle was added via syringe. Lastly, nitromethane (41.0  $\mu$ L, 0.75 mmol, 3.0 equiv) and diphenylsilane (139  $\mu$ L, 0.75 mmol, 3.0 equiv) were added and the reaction mixture was stirred at 120 °C. Upon completion, the mixture was purified directly by flash column chromatography with Hex:EA=1:1 on silica gel (42 mg, 51%). <sup>1</sup>H NMR

(400 MHz, Chloroform-*d*)  $^1\text{H}$  NMR (400 MHz, Chloroform-*d*)  $\delta$  7.57 – 7.47 (m, 2H), 7.44 (dd,  $J = 8.4, 6.9$  Hz, 2H), 7.40 – 7.32 (m, 1H), 7.19 (dt,  $J = 5.8, 1.4$  Hz, 3H), 3.61 (d,  $J = 12.3$  Hz, 1H), 3.55 (s, 3H), 3.69 – 3.40 (m, 5H).  $^{13}\text{C}$  NMR (101 MHz, Chloroform-*d*)  $\delta$  165.6, 164.3, 140.2, 139.7, 136.3, 129.8, 128.70 (q,  $J = 33.9$  Hz), 128.0, 124.5, 123.1 (q,  $J = 270.9$  Hz), 123.7 – 123.4 (m, 3C), 44.4, 35.8.  $^{19}\text{F}$  NMR (376 MHz, Chloroform-*d*)  $\delta$  -62.64. HRMS (ESI) calculated for  $\text{C}_{17}\text{H}_{17}\text{N}_3\text{F}_3\text{O}_2$   $[\text{M}+\text{NH}_4]^+$ : 352.1267; Found: 352.1277.



## VI. DFT Computation

Kohn-Sham frontier orbital eigenvalues (in hartrees) for  $\text{H}_3\text{C-NO}_2$  and  $\text{H}_5\text{C}_6\text{-NO}_2$  at the  $\omega\text{B97XD/6-311++G(2d,2p)}$  level of theory are as follows:

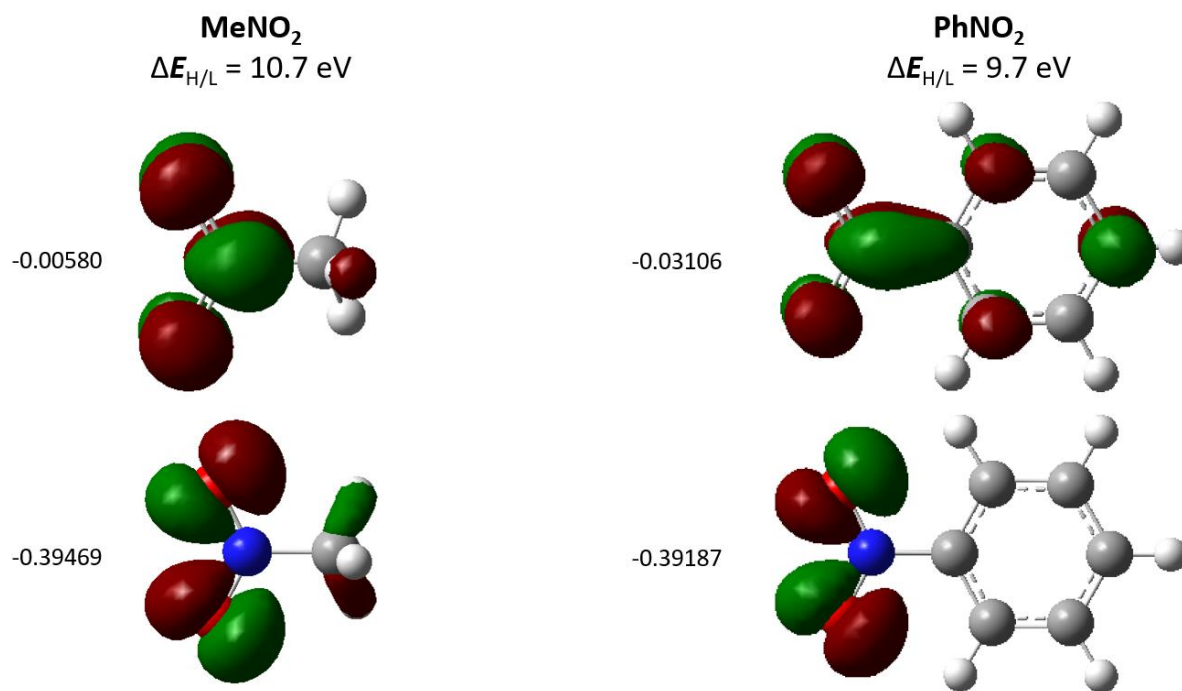

## VI. Spectra Data

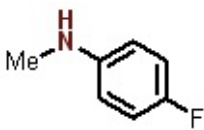

4,  
<sup>1</sup>H, CDCl<sub>3</sub>, 400 MHz

7.260 CDCl<sub>3</sub>  
6.932  
6.926  
6.910  
6.894  
6.888  
6.879  
6.572  
6.563  
6.557  
6.552  
6.546  
6.540  
6.535  
6.529  
6.520

— 3.587

— 2.793

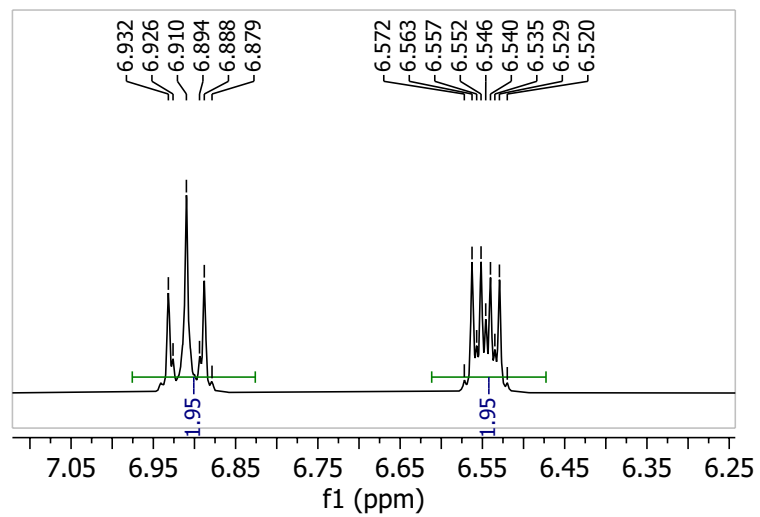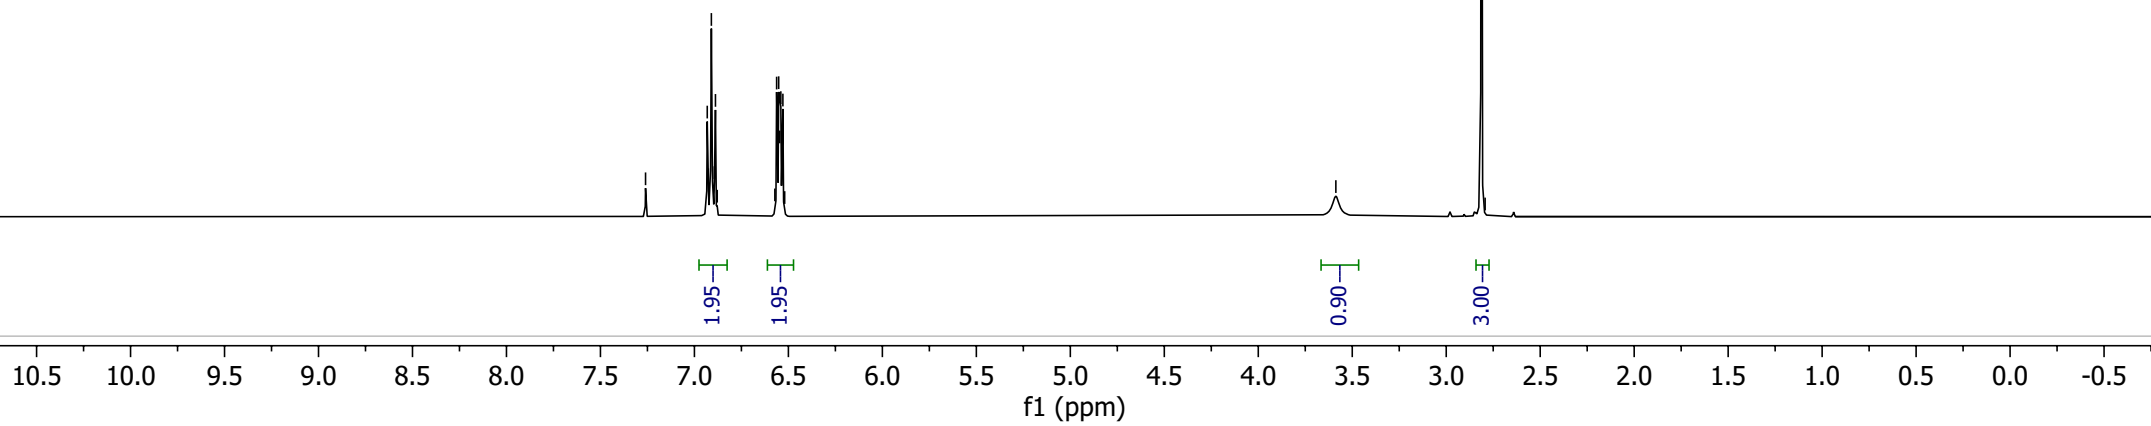

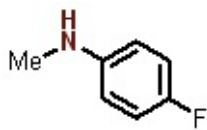

157.085  
154.755

145.848  
145.830

115.819  
115.598  
113.272  
113.199

77.477 CDCl3  
77.160 CDCl3  
76.842 CDCl3

31.437

4  
<sup>13</sup>C, CDCl<sub>3</sub>, 101 MHz

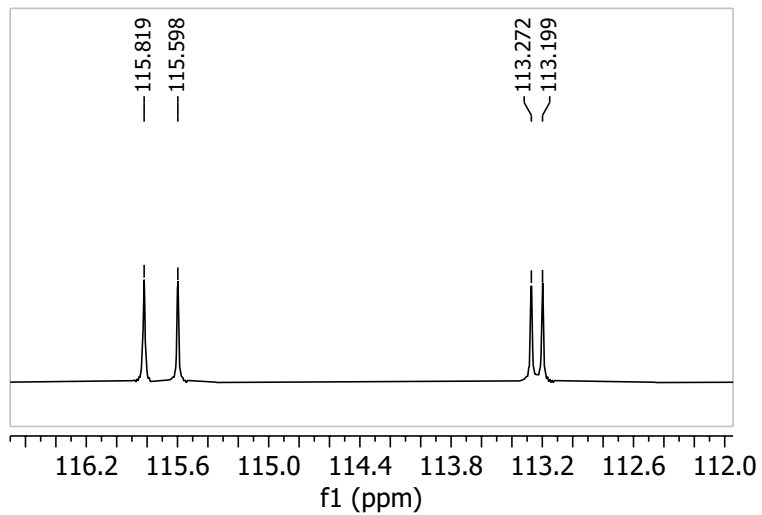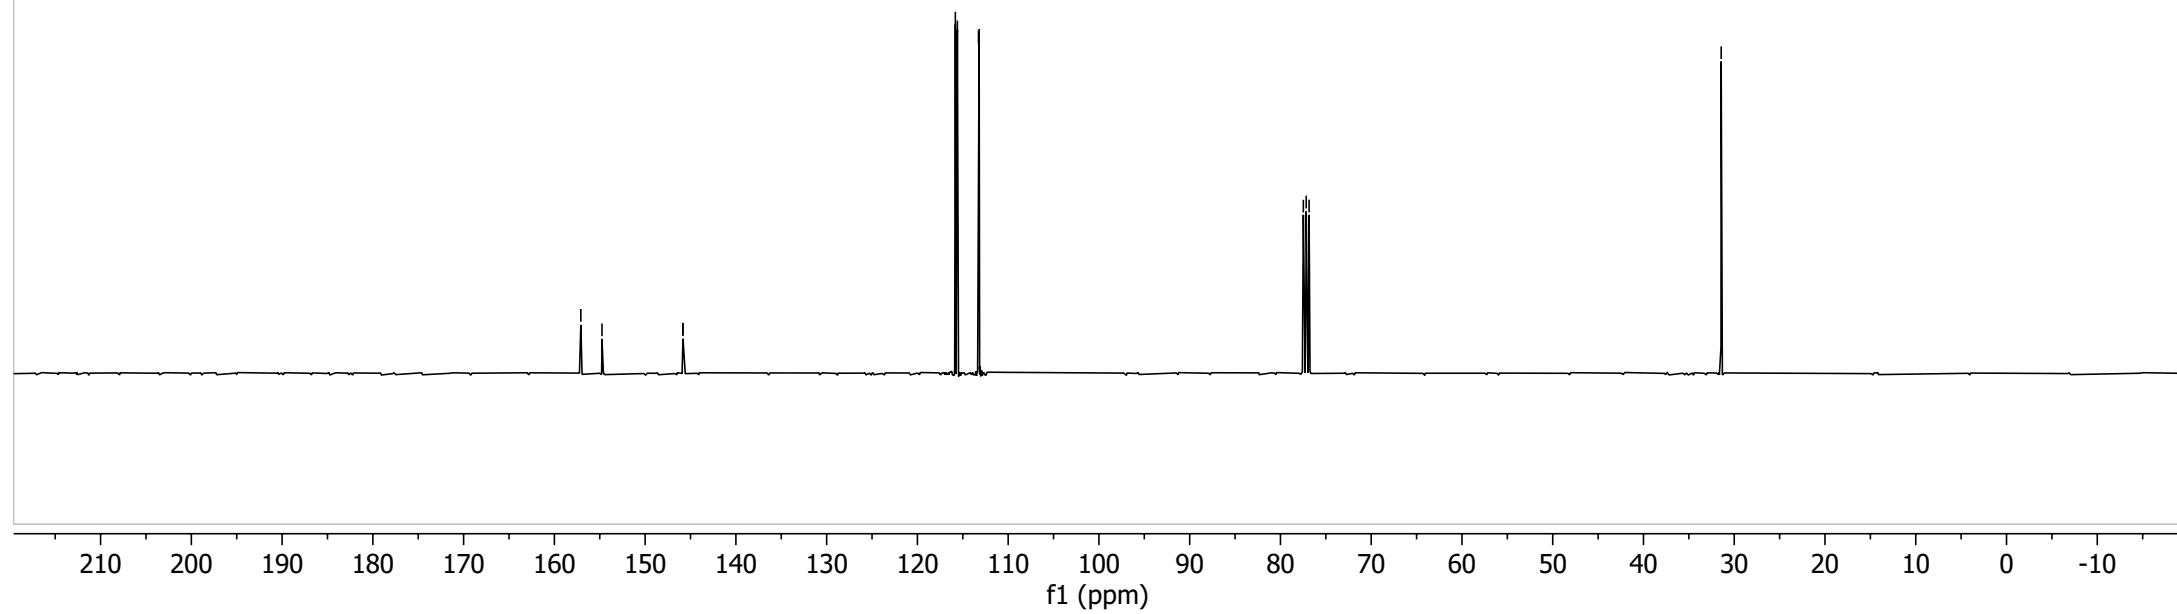

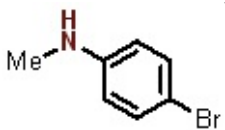

5  
<sup>1</sup>H, CDCl<sub>3</sub>, 400 MHz

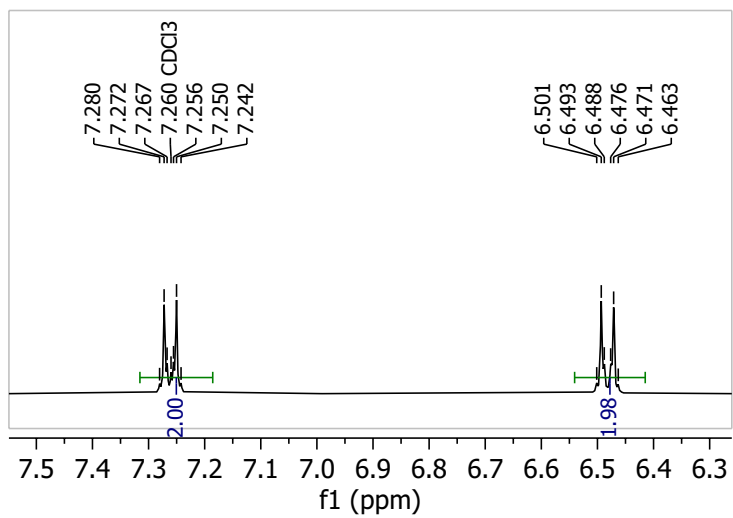

7.280  
7.272  
7.267  
7.260 CDCl<sub>3</sub>  
7.256  
7.250  
7.242  
6.501  
6.493  
6.488  
6.476  
6.471  
6.463

— 3.685

— 2.807

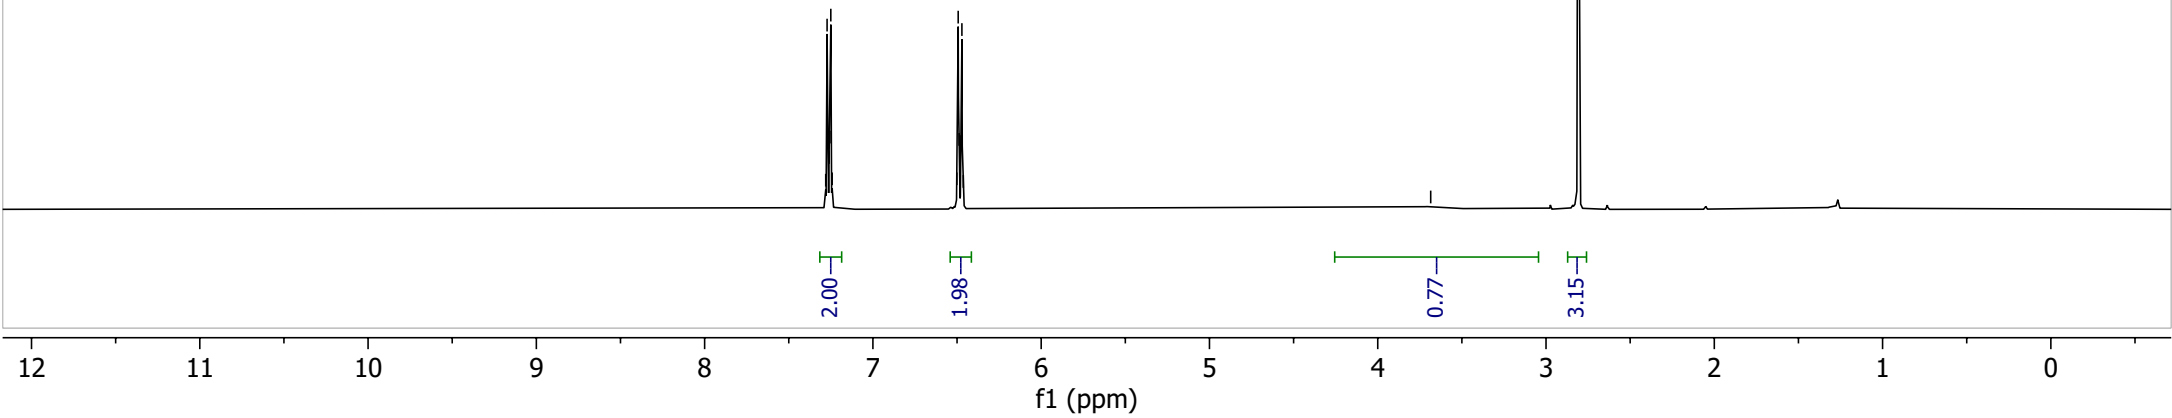

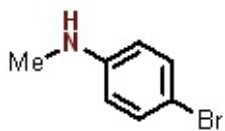

5

$^{13}\text{C}$ ,  $\text{CDCl}_3$ , 101 MHz

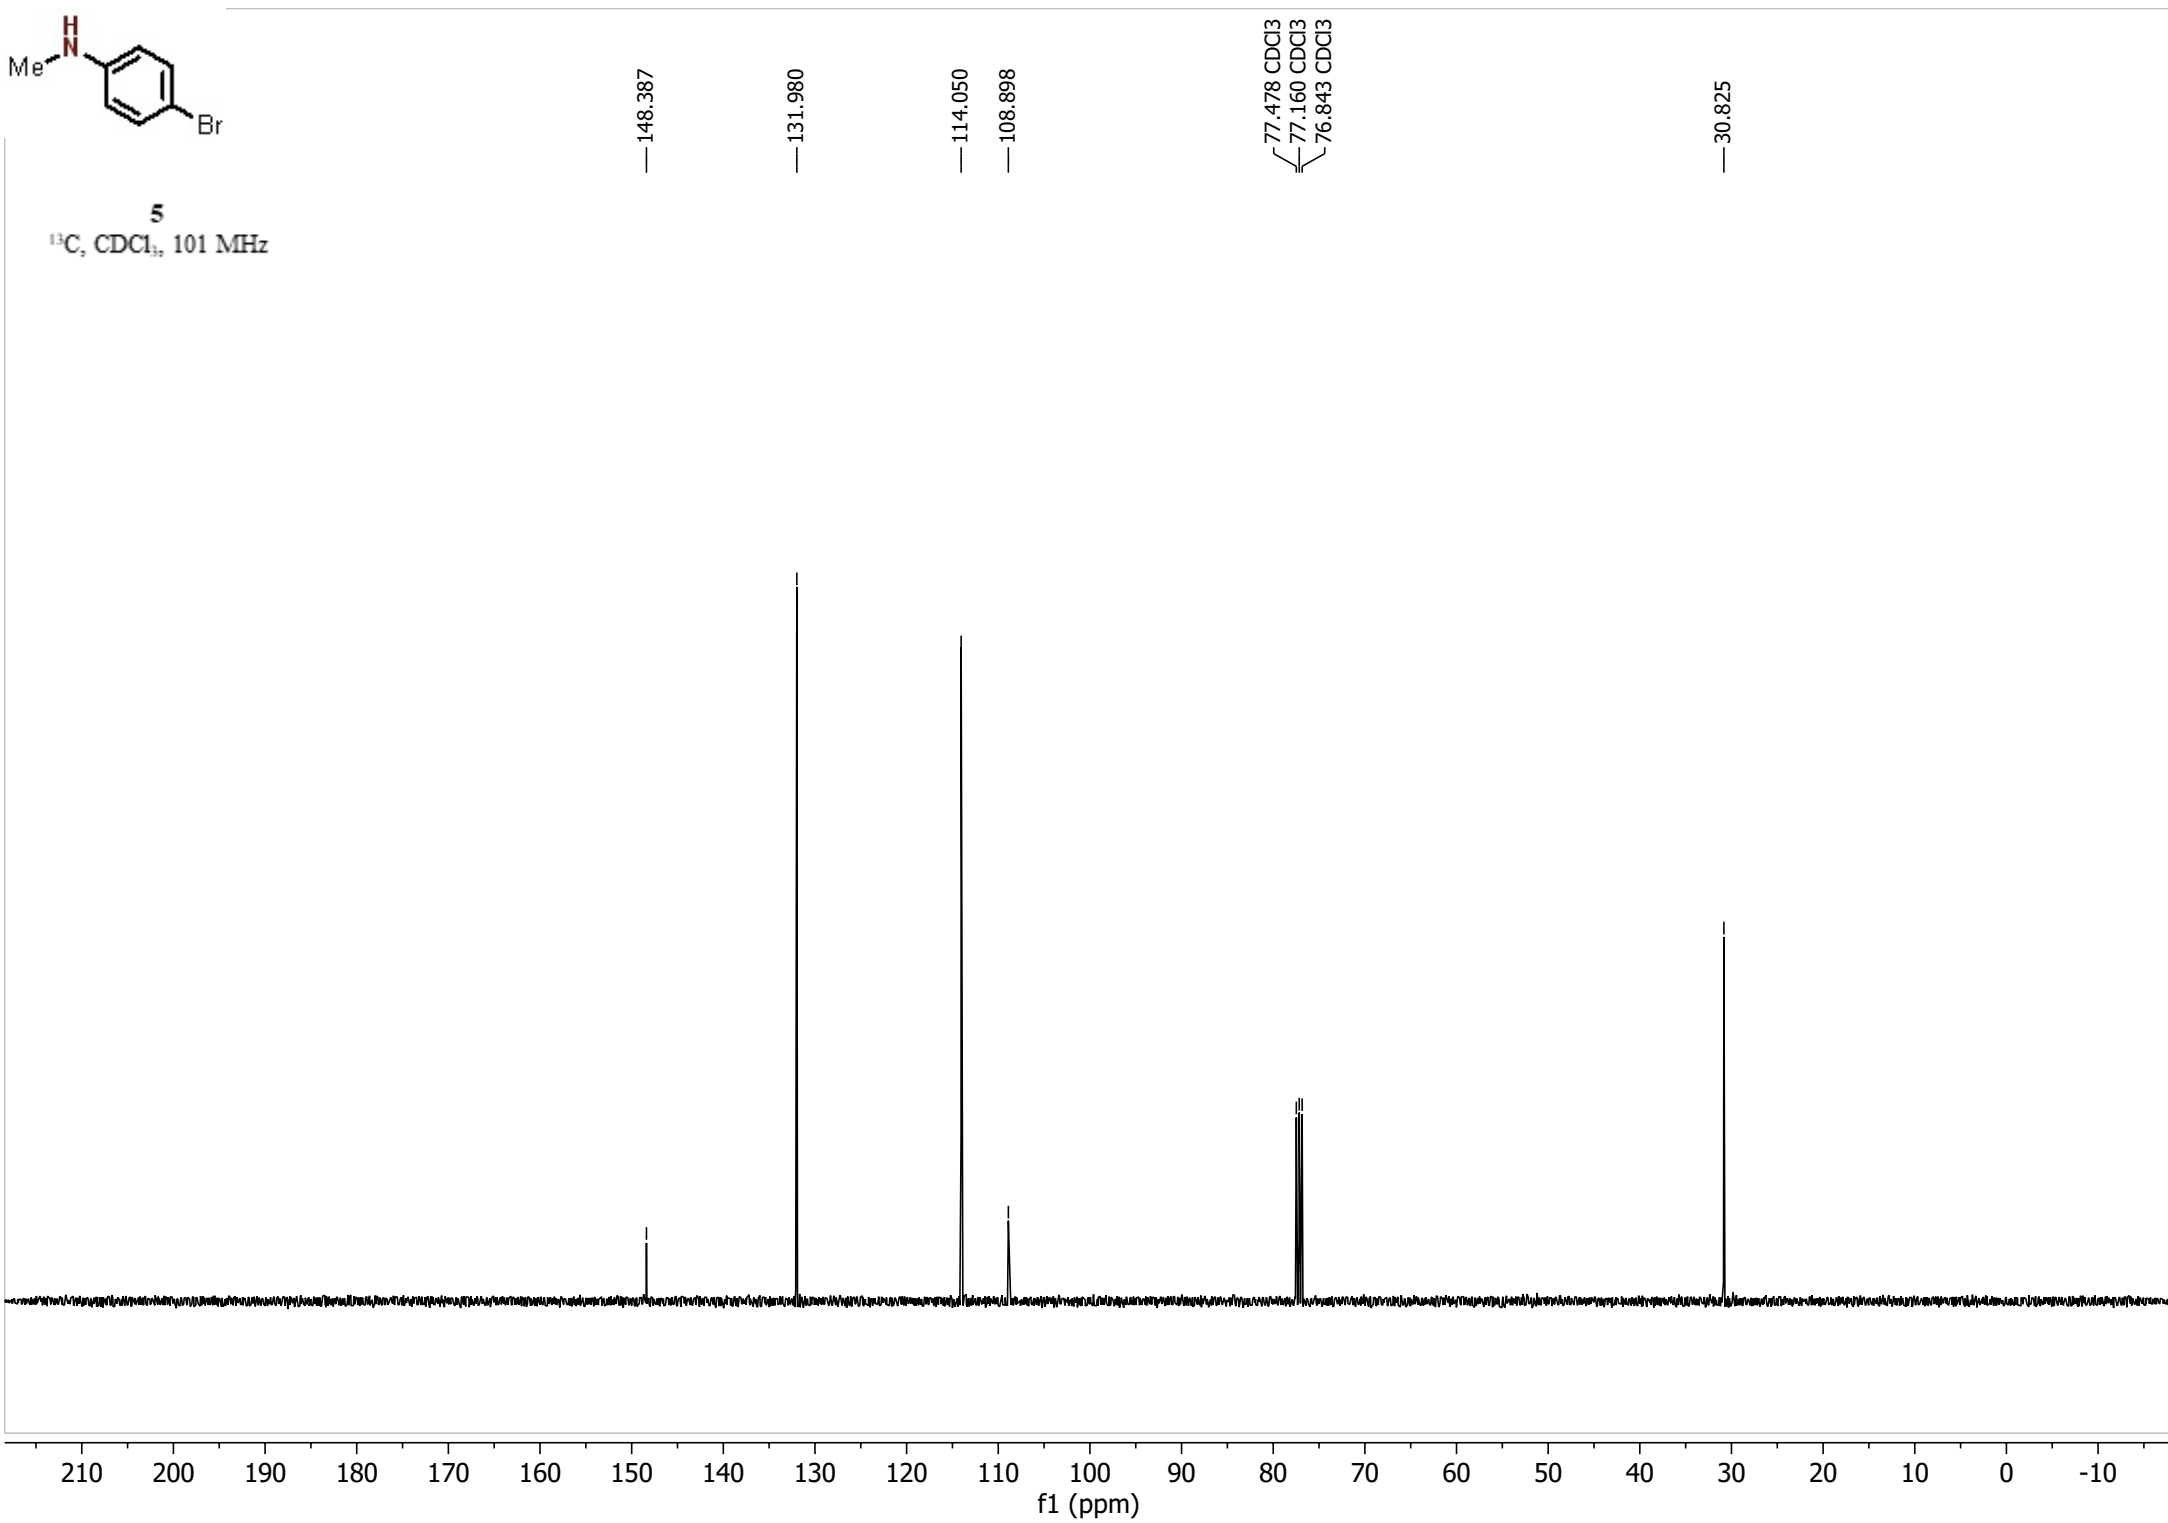

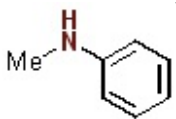

7.260 CDCl3  
7.226  
7.221  
7.208  
7.204  
7.191  
7.186  
7.181  
6.745  
6.742  
6.739  
6.726  
6.723  
6.720  
6.708  
6.705  
6.702  
6.642  
6.639  
6.637  
6.634  
6.626  
6.623  
6.620  
6.618

— 3.694

— 2.848

**6**  
<sup>1</sup>H, CDCl<sub>3</sub>, 400 MHz

1.98

1.06  
1.96

1.04

3.26

11 10 9 8 7 6 5 4 3 2 1 0  
f1 (ppm)

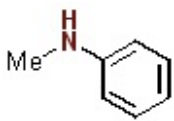

6

$^{13}\text{C}$ ,  $\text{CDCl}_3$ , 101 MHz

— 149.467

— 129.334

— 117.379

— 112.541

77.479  $\text{CDCl}_3$   
77.160  $\text{CDCl}_3$   
76.843  $\text{CDCl}_3$

— 30.862

210 200 190 180 170 160 150 140 130 120 110 100 90 80 70 60 50 40 30 20 10 0 -10  
f1 (ppm)



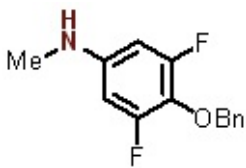

7

<sup>1</sup>H, CDCl<sub>3</sub>, 400 MHz

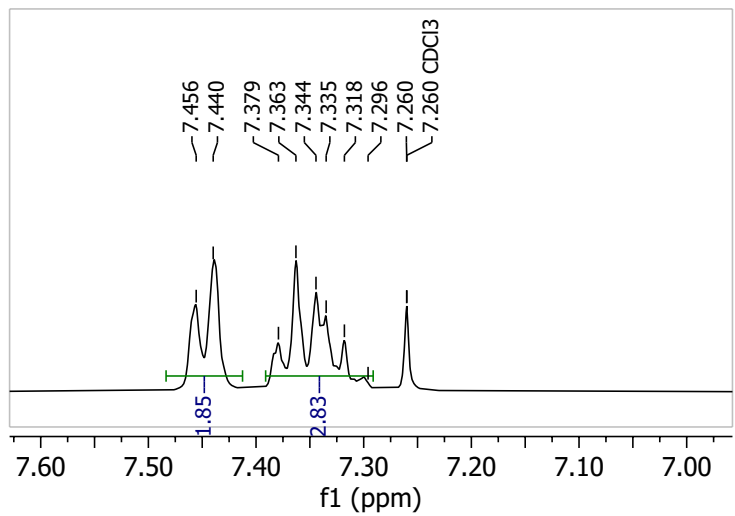

7.456  
7.440  
7.379  
7.363  
7.344  
7.335  
7.318  
7.296  
7.260 CDCl<sub>3</sub>

6.116  
6.089

5.008

3.677

2.701

1.85  
2.83

1.96

1.95

1.00

3.00

12 11 10 9 8 7 6 5 4 3 2 1 0

f1 (ppm)

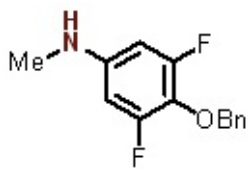

7  
 $^{13}\text{C}$ ,  $\text{CDCl}_3$ , 101 MHz

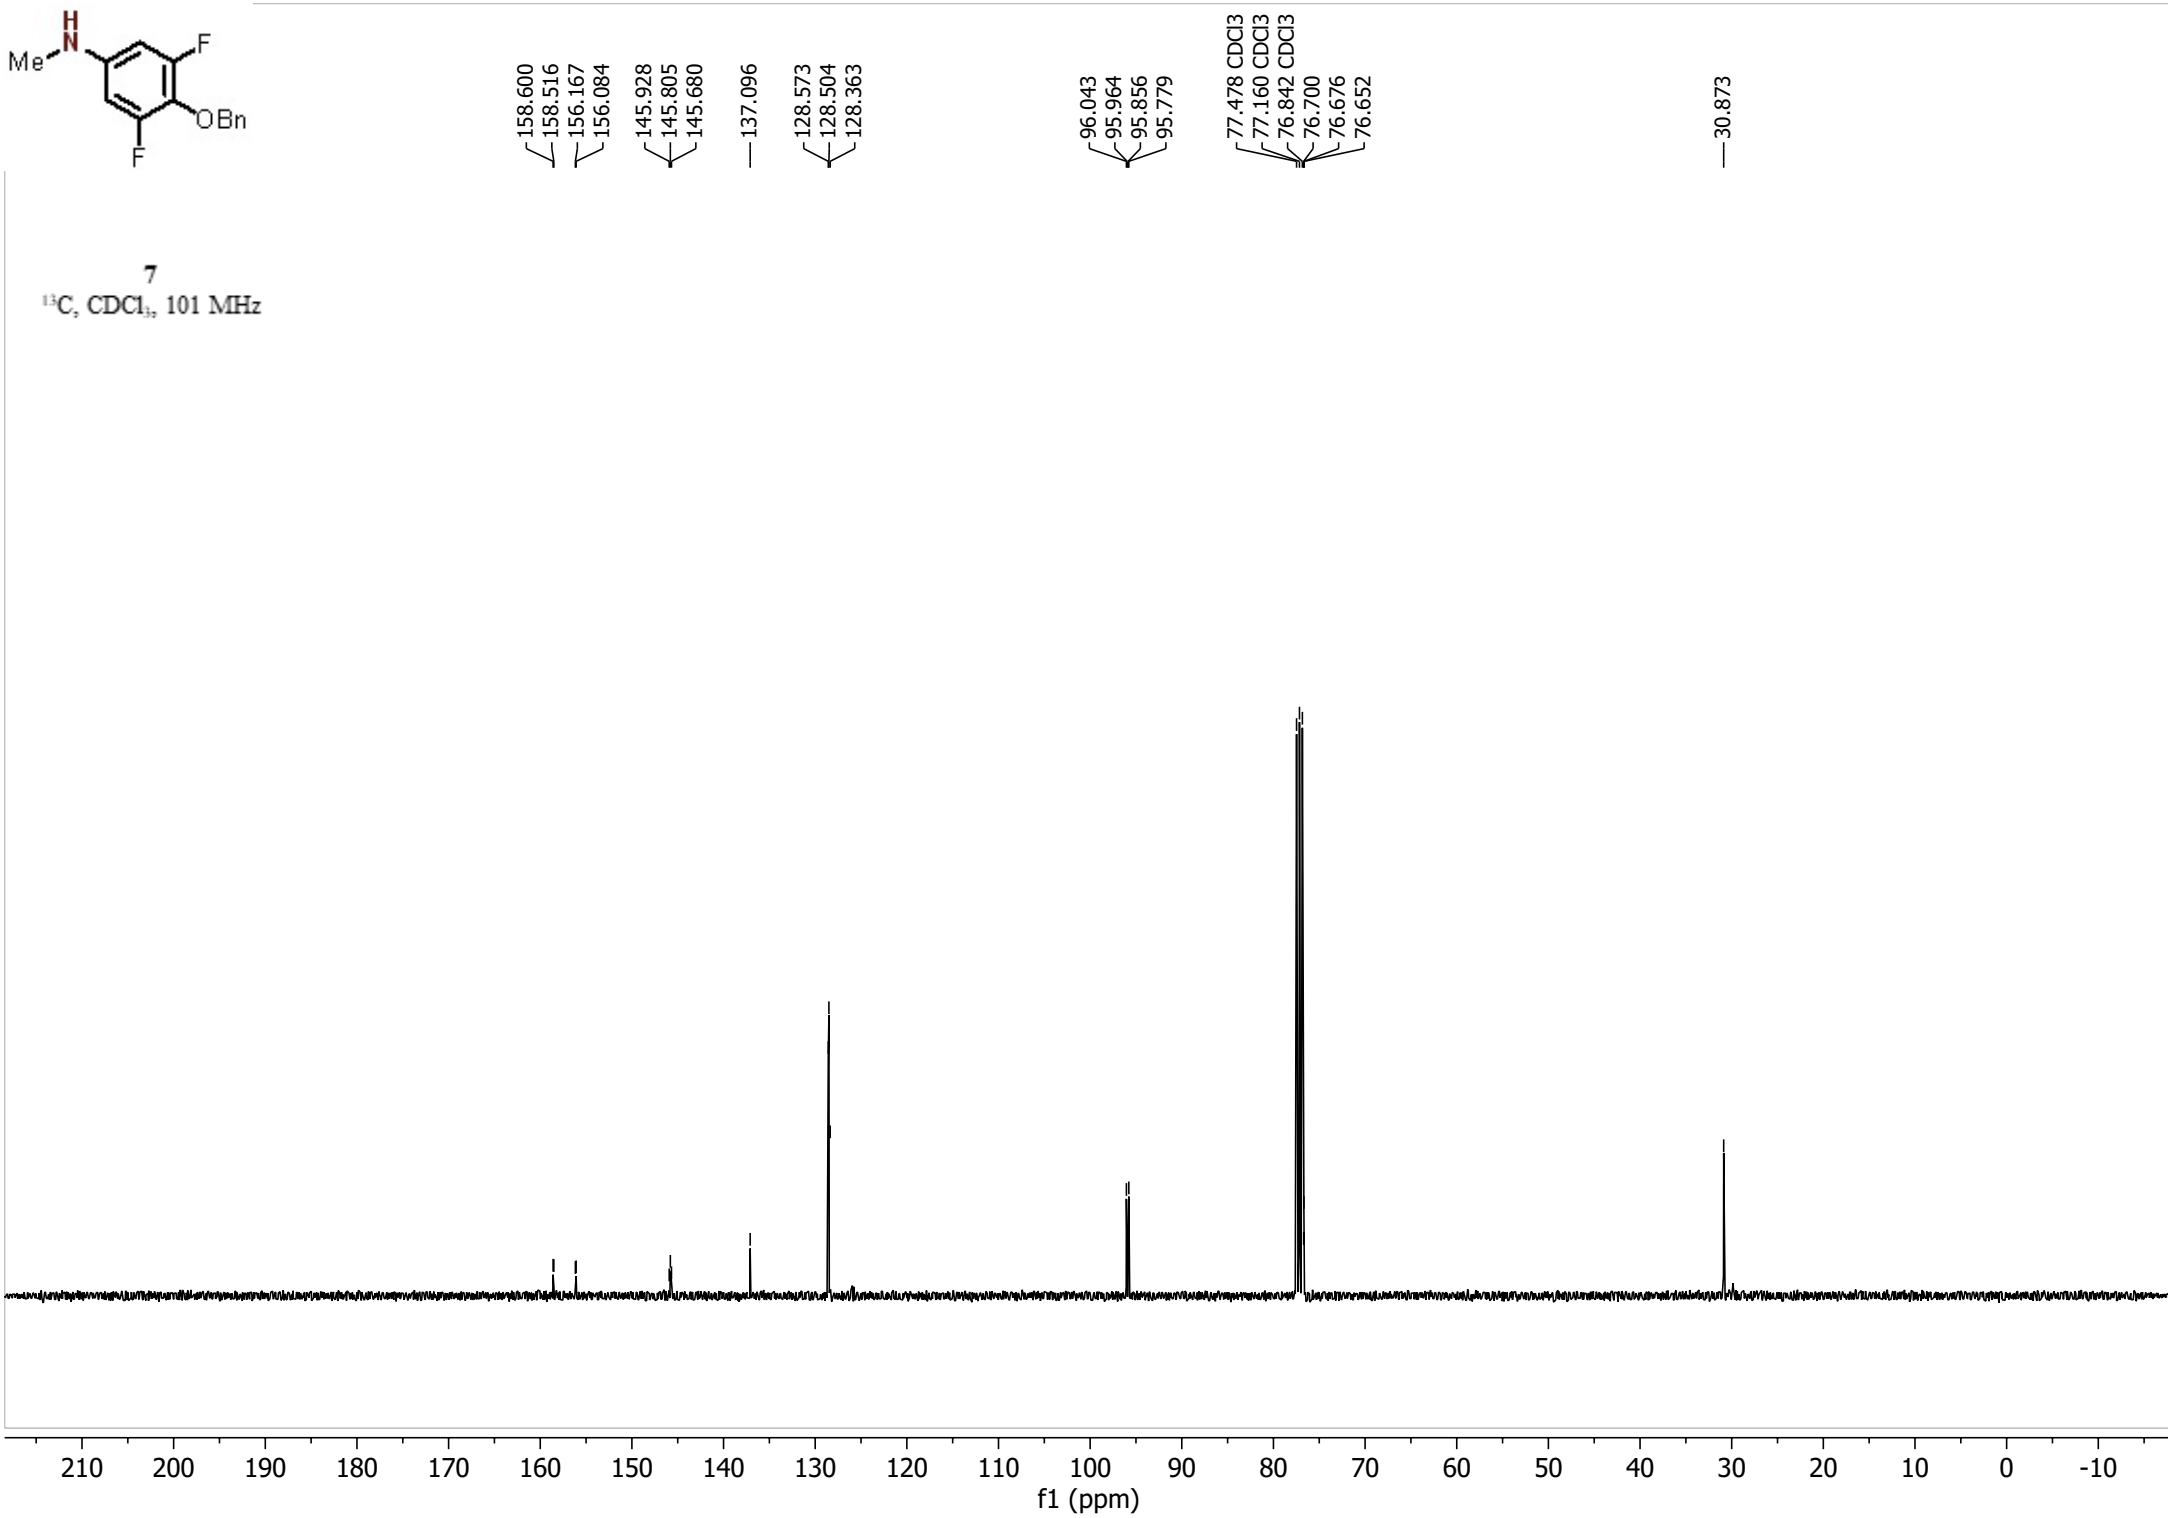

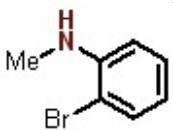

8

$^1\text{H}$ ,  $\text{CDCl}_3$ , 400 MHz

7.447  
7.424  
7.260  $\text{CDCl}_3$   
7.241  
7.226  
7.202  
6.699  
6.675  
6.627  
6.611  
6.592

4.803

2.909

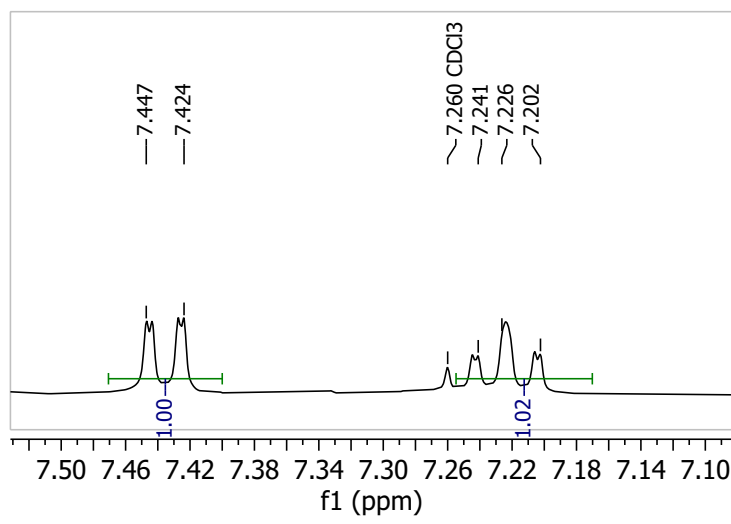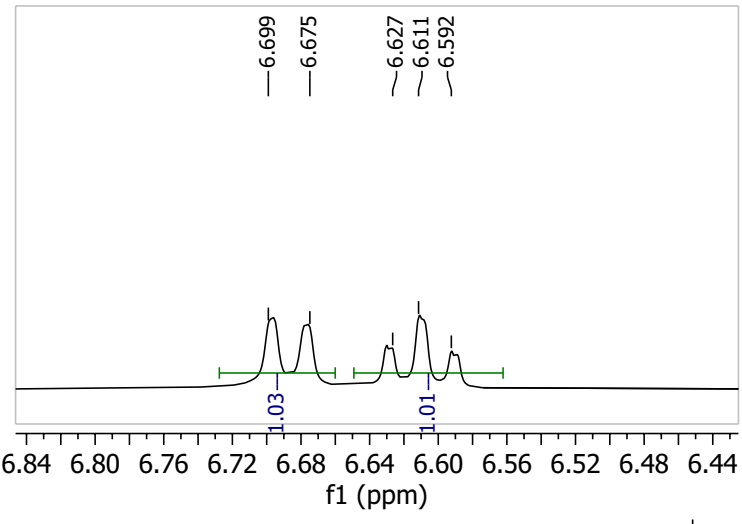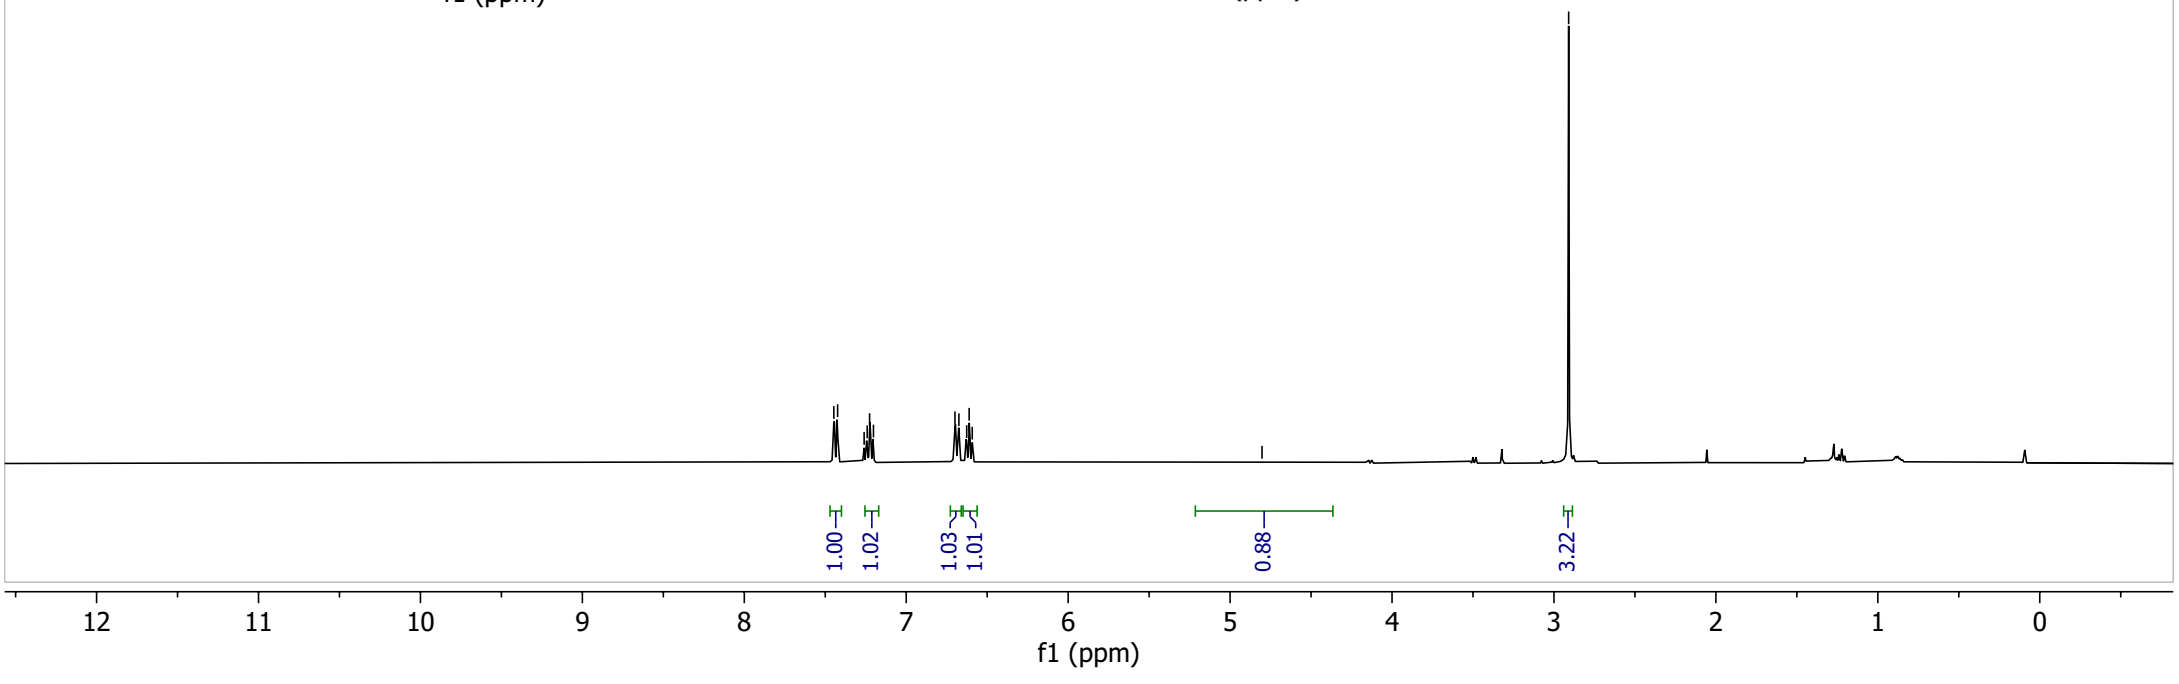

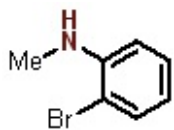

**8**

$^{13}\text{C}$ ,  $\text{CDCl}_3$ , 101 MHz

— 145.672

— 132.442

— 128.676

— 118.206

— 111.393

— 109.985

77.480  $\text{CDCl}_3$

77.160  $\text{CDCl}_3$

76.842  $\text{CDCl}_3$

— 30.951

210 200 190 180 170 160 150 140 130 120 110 100 90 80 70 60 50 40 30 20 10 0 -10  
f1 (ppm)

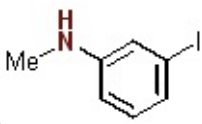

9

$^1\text{H}$ ,  $\text{CDCl}_3$ , 400 MHz

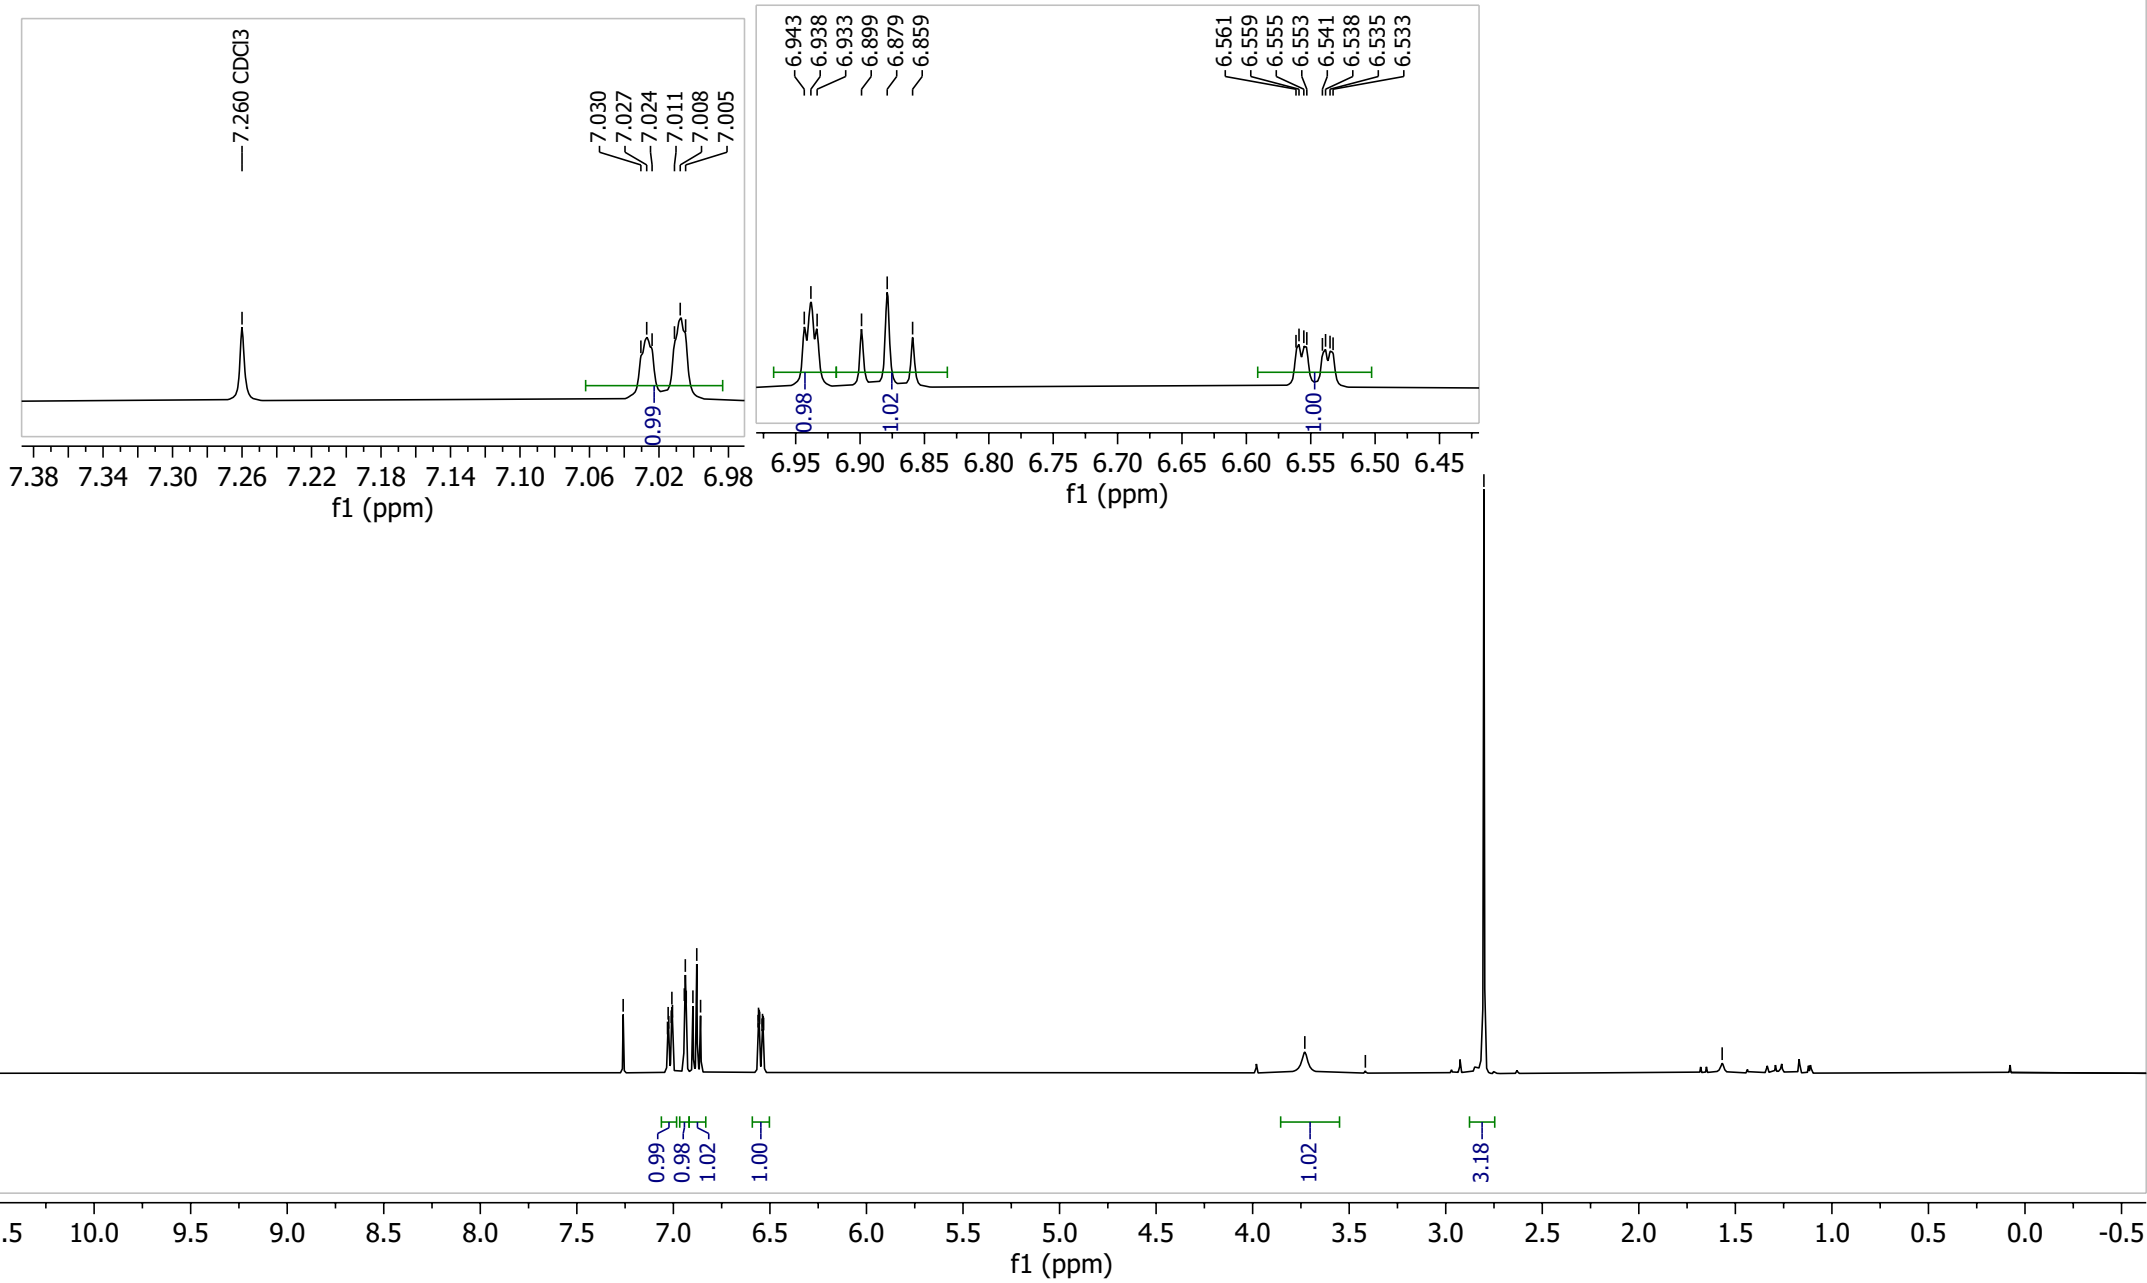

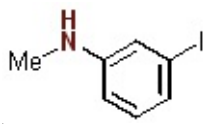

9

$^{13}\text{C}$ ,  $\text{CDCl}_3$ , 101 MHz

—150.589

—130.725

—126.166

—120.915

—111.973

—95.430

77.478,  $\text{CDCl}_3$

77.161,  $\text{CDCl}_3$

76.843,  $\text{CDCl}_3$

—30.606

210 200 190 180 170 160 150 140 130 120 110 100 90 80 70 60 50 40 30 20 10 0 -10

f1 (ppm)

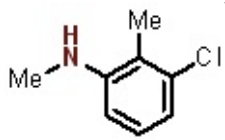

**10**  
<sup>1</sup>H, CDCl<sub>3</sub>, 400 MHz

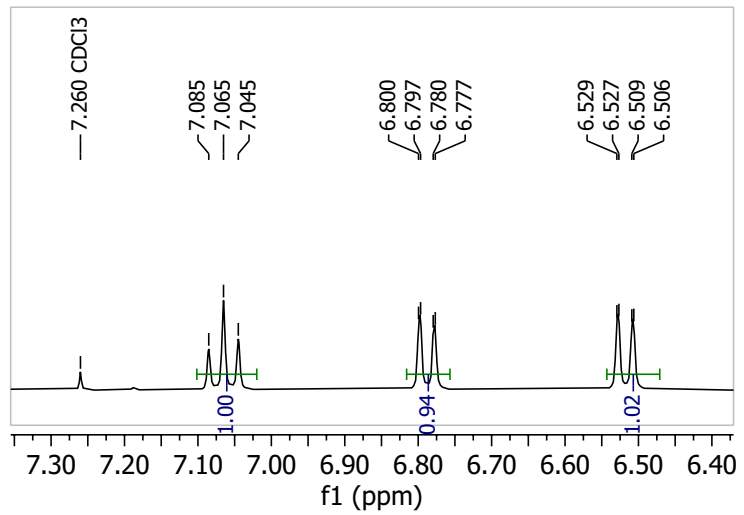

7.260 CDCl<sub>3</sub>  
7.085  
7.065  
7.045  
6.800  
6.797  
6.780  
6.777  
6.529  
6.527  
6.509  
6.506

— 3.701

— 2.897

— 2.185

11

10

9

8

7

6

5

4

3

2

1

0

-1

f1 (ppm)

1.00  
0.94  
1.02

0.94

3.29

3.19

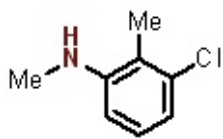

10

$^{13}\text{C}$ ,  $\text{CDCl}_3$ , 101 MHz

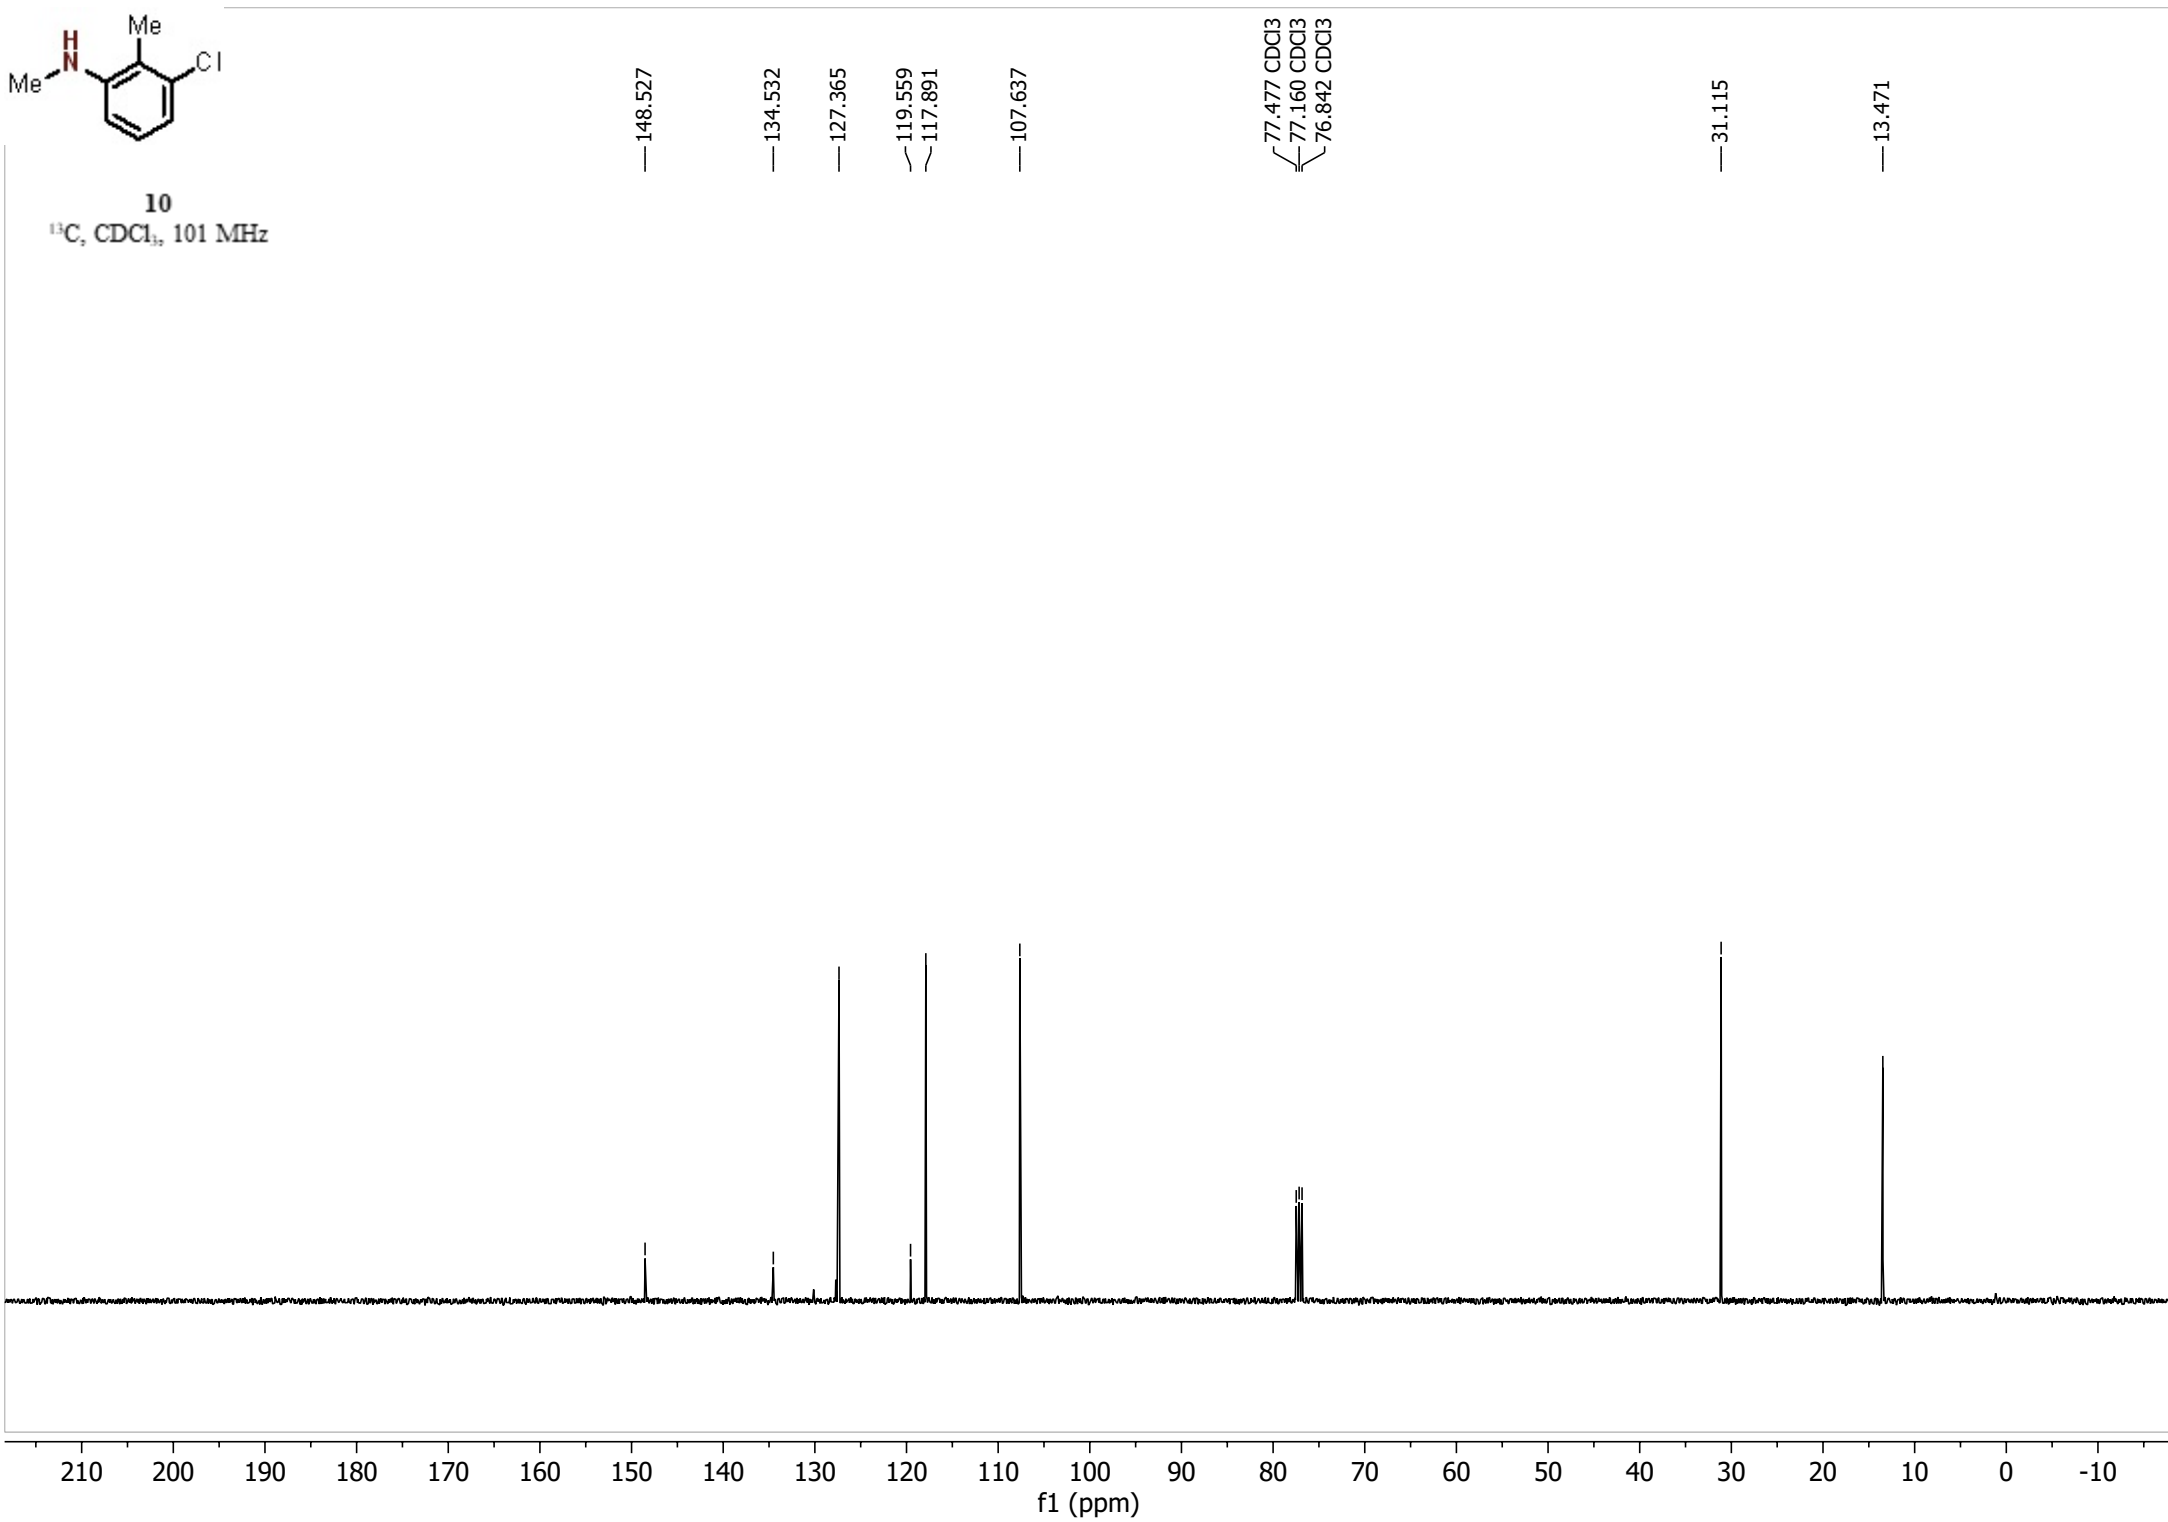



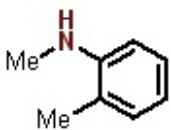

11

<sup>1</sup>H, CDCl<sub>3</sub>, 400 MHz

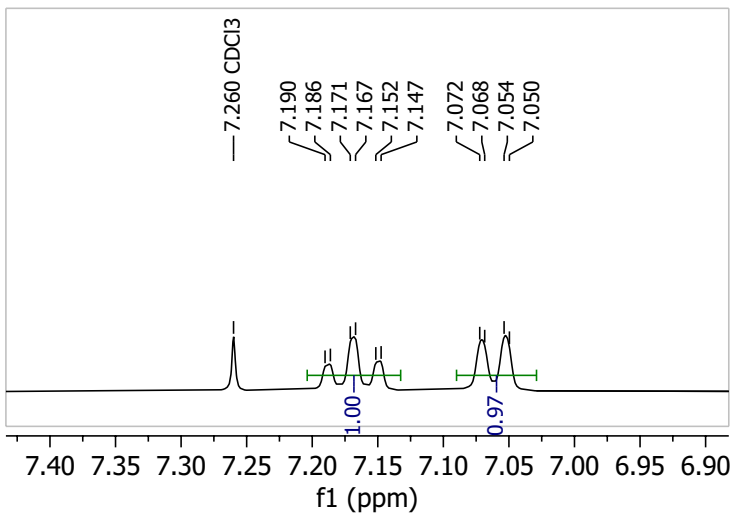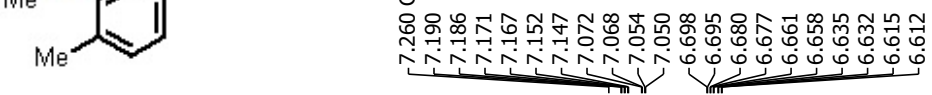

3.618

2.892

2.143

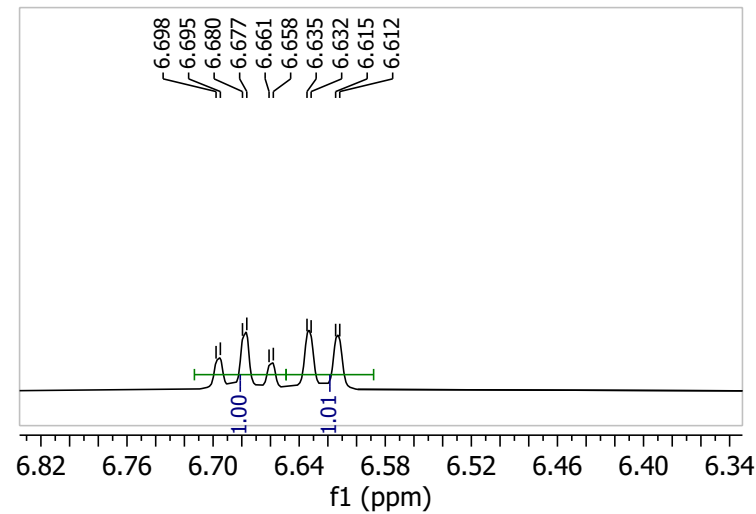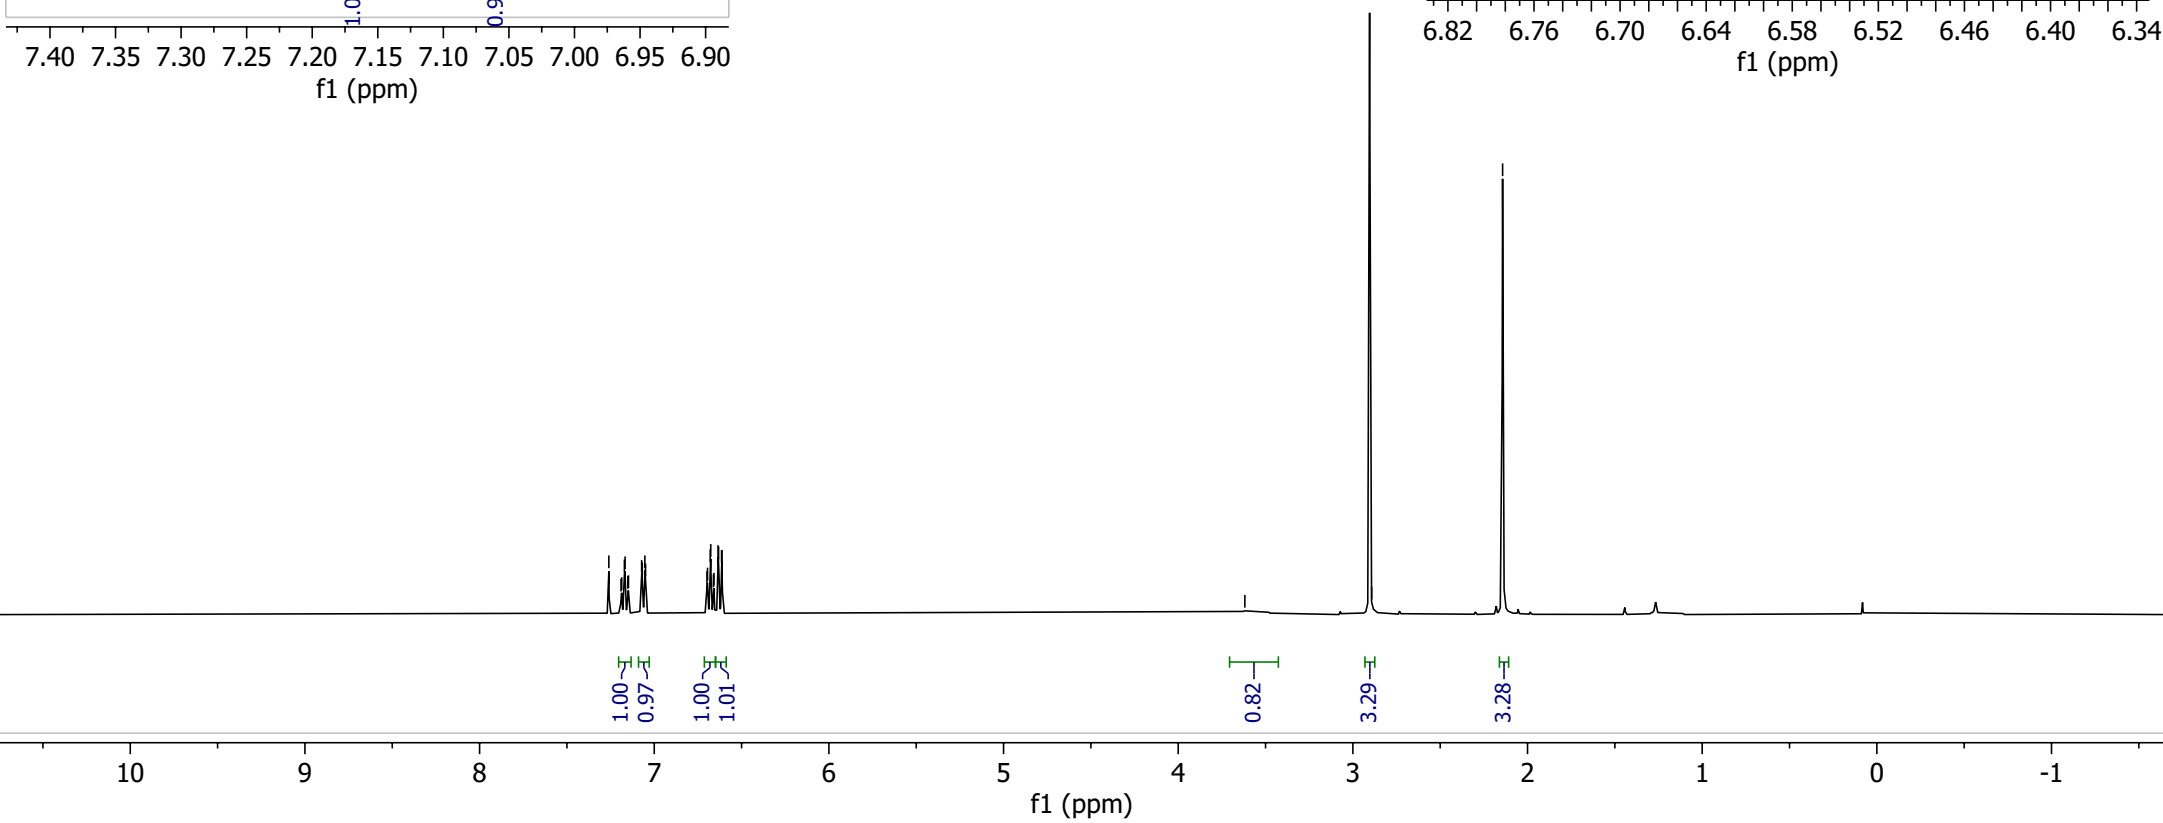

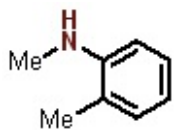

11

$^{13}\text{C}$ ,  $\text{CDCl}_3$ , 101 MHz

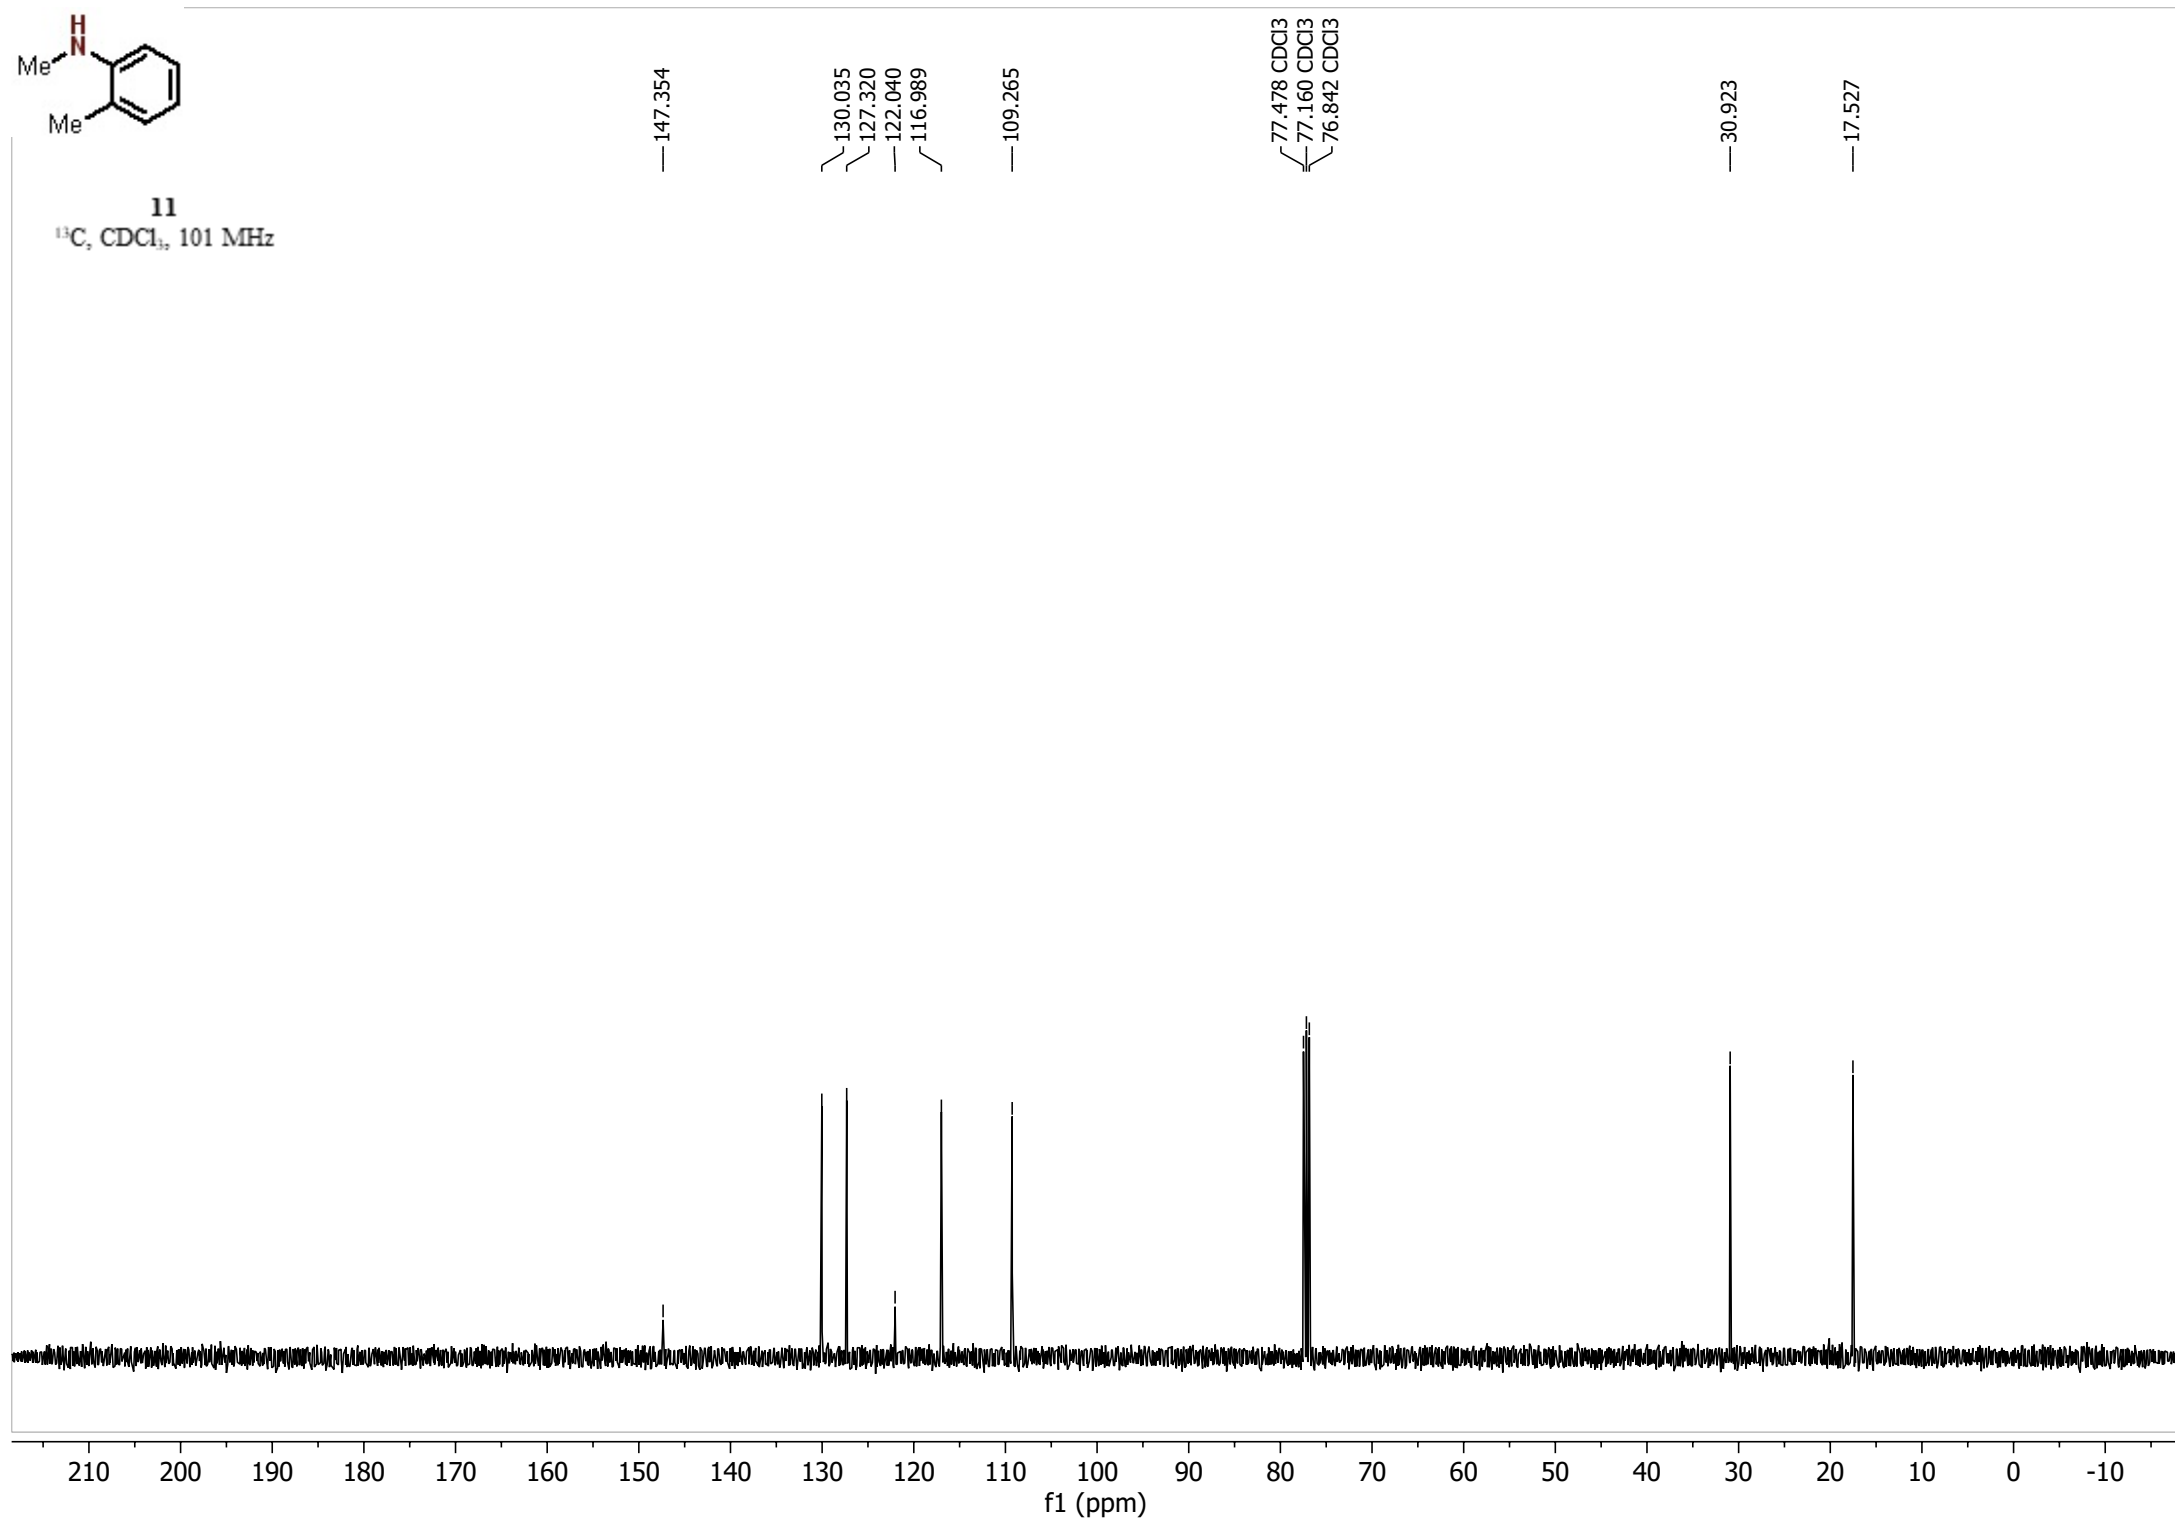

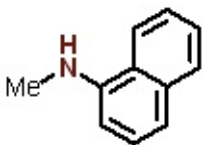

12

<sup>1</sup>H, CDCl<sub>3</sub>, 400 MHz

7.850  
7.831  
7.808  
7.788  
7.512  
7.495  
7.480  
7.475  
7.447  
7.443  
7.427  
7.408  
7.304  
7.284  
7.260 CDCl<sub>3</sub>  
6.650  
6.631

4.436

3.038

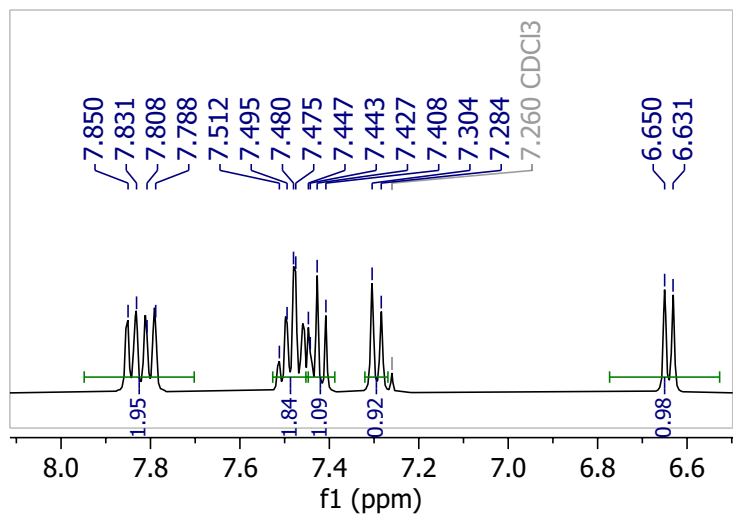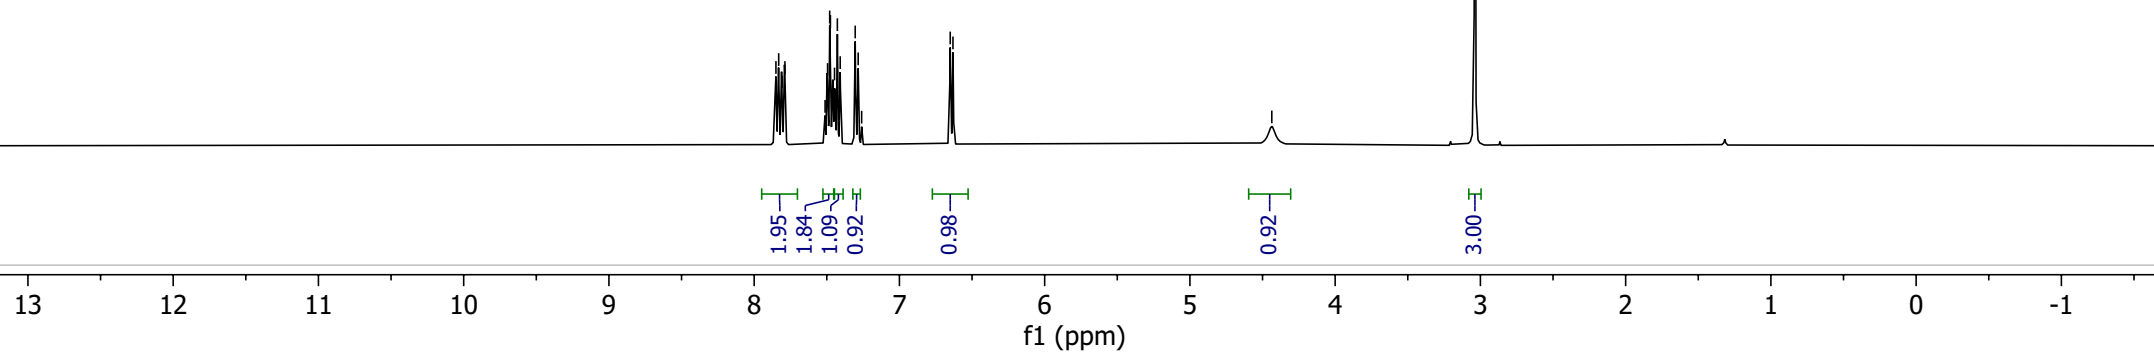

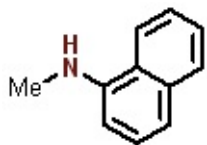

12

$^{13}\text{C}$ ,  $\text{CDCl}_3$ , 101 MHz

— 144.639

— 134.329

— 128.761

— 126.792

— 125.811

— 124.779

— 123.548

— 119.909

— 117.393

— 103.865

77.478  $\text{CDCl}_3$

77.160  $\text{CDCl}_3$

76.843  $\text{CDCl}_3$

— 31.108

210 200 190 180 170 160 150 140 130 120 110 100 90 80 70 60 50 40 30 20 10 0 -10

f1 (ppm)

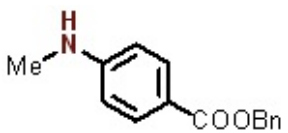

**13**  
<sup>1</sup>H, CDCl<sub>3</sub>, 400 MHz

7.939  
7.932  
7.928  
7.916  
7.910  
7.903  
7.448  
7.430  
7.398  
7.394  
7.390  
7.377  
7.373  
7.358  
7.342  
7.339  
7.335  
7.328  
7.321  
7.303  
7.260 CDCl<sub>3</sub>  
6.560  
6.538  
— 5.318  
— 4.192  
— 2.884

1.93  
2.08  
1.87  
0.97  
1.95  
1.86  
0.92  
3.00

15 14 13 12 11 10 9 8 7 6 5 4 3 2 1 0 -1 -2 -3

f1 (ppm)

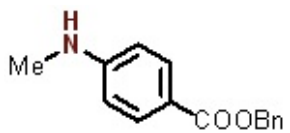

**13**

$^{13}\text{C}$ ,  $\text{CDCl}_3$ , 101 MHz

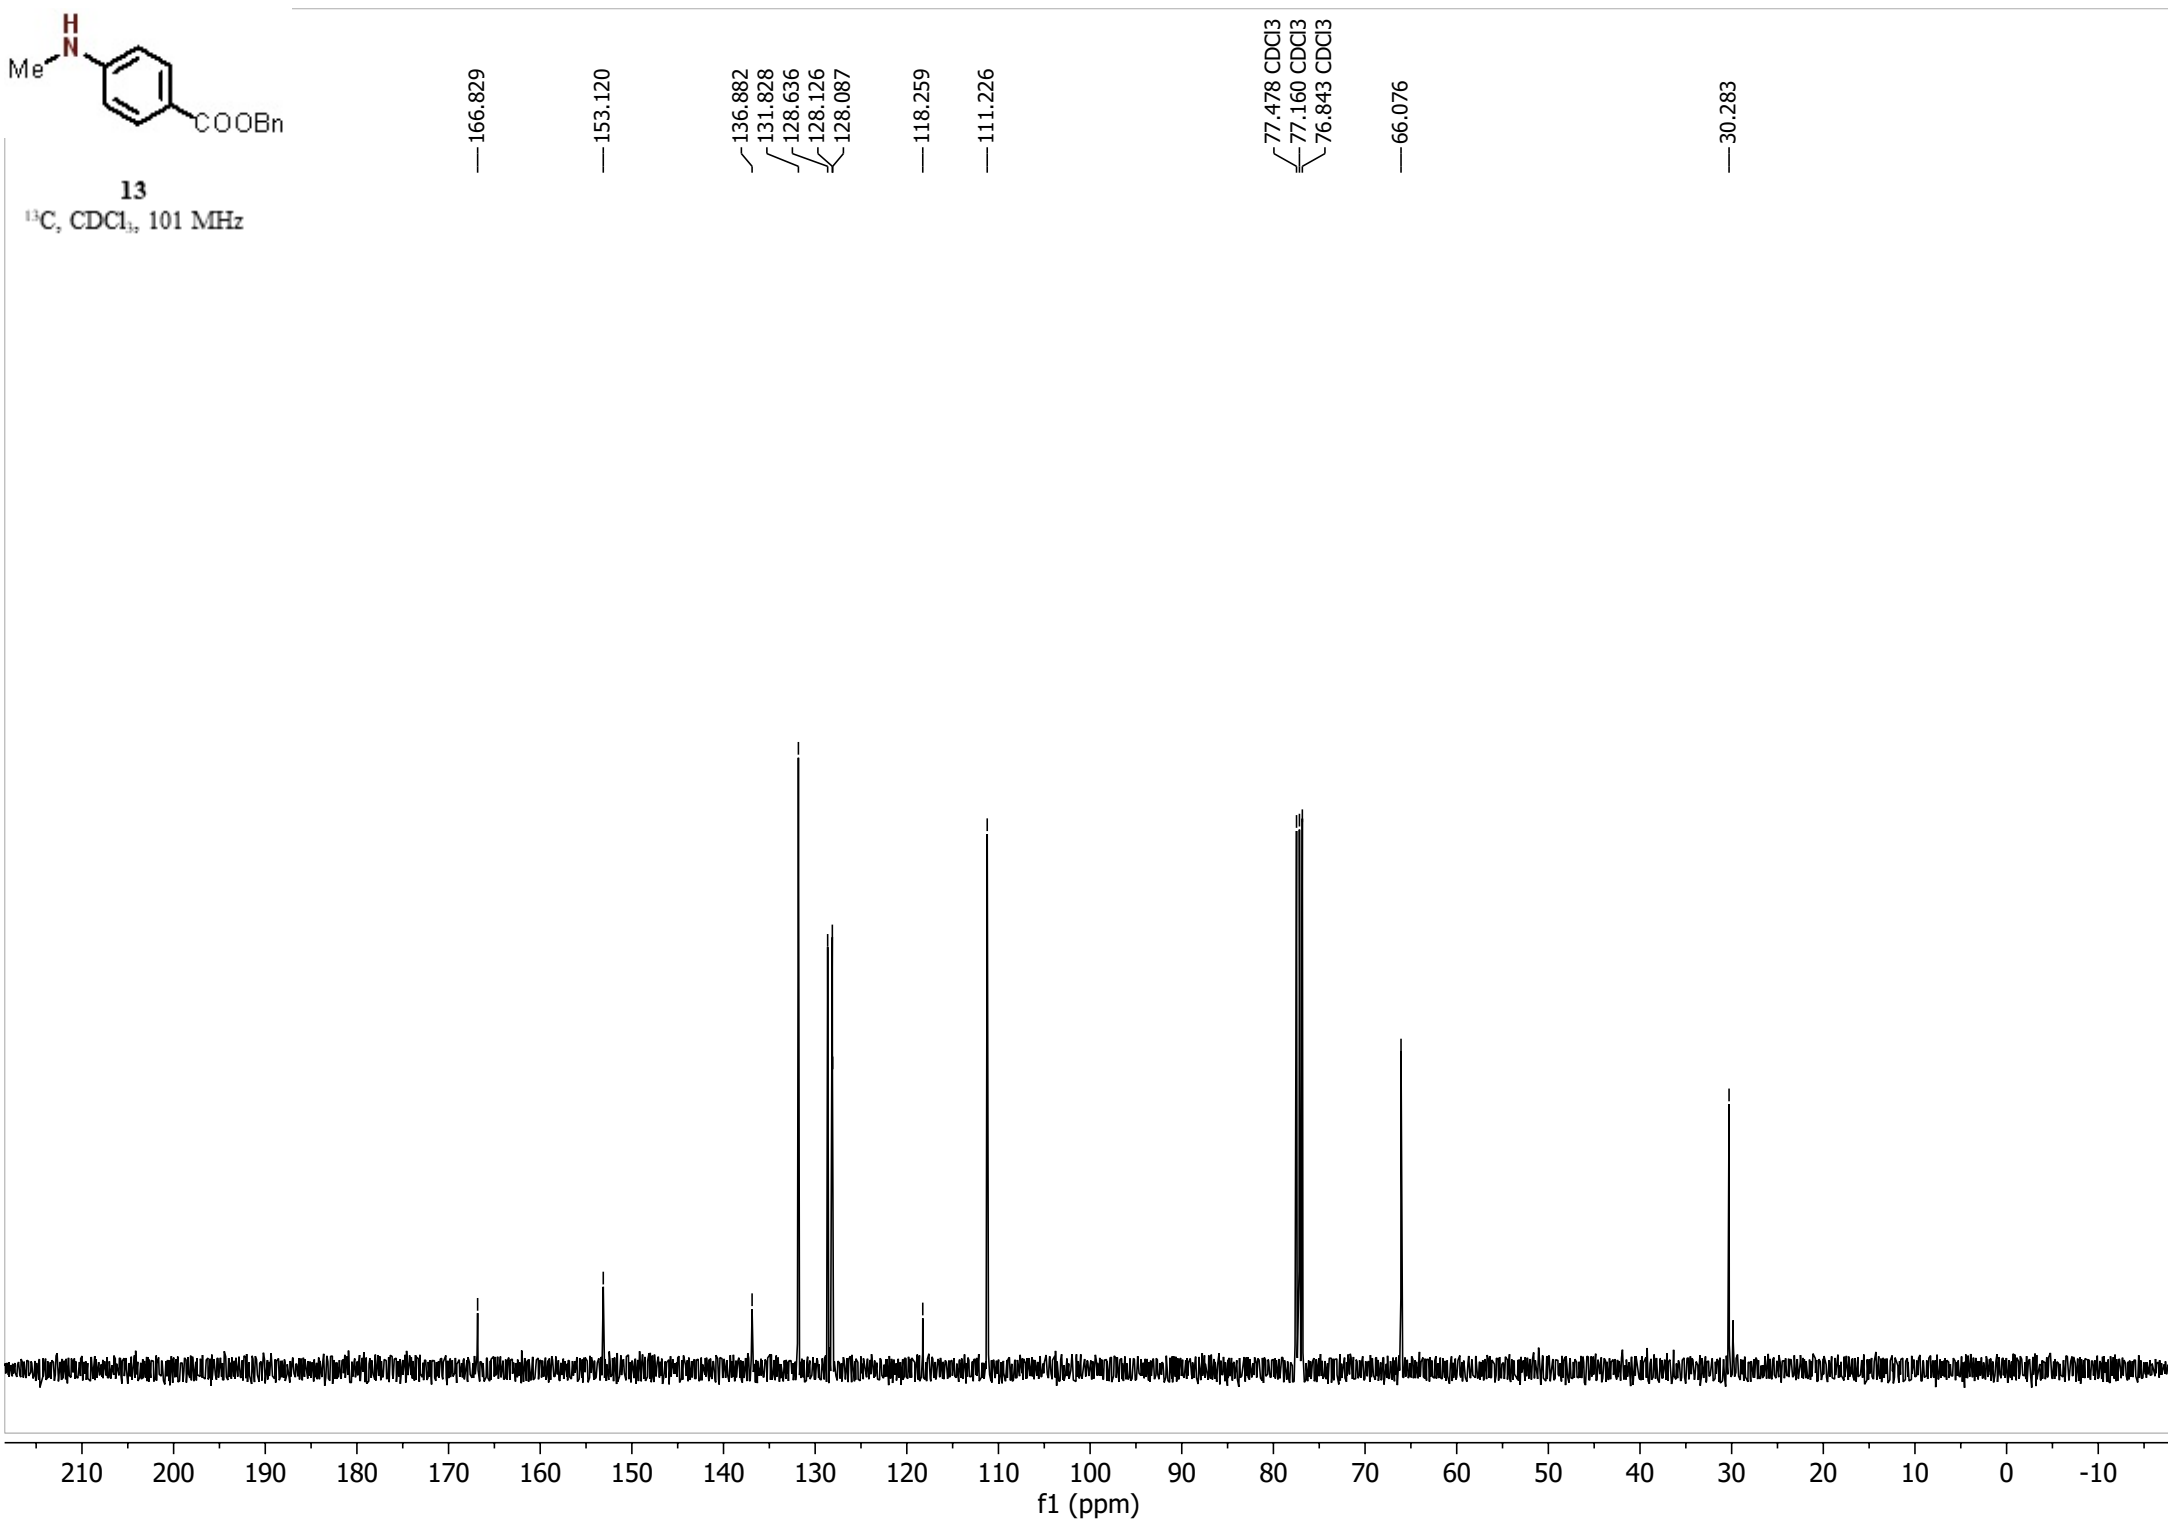

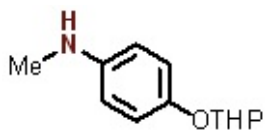

7.260 CDCl<sub>3</sub>

6.954  
6.923  
6.571  
6.555

5.254  
5.246  
5.237  
4.032  
3.999  
3.990  
3.976  
3.969  
3.962  
3.947  
3.940  
3.609  
3.606  
3.598  
3.595  
3.589  
3.585  
3.581  
3.578  
3.570  
3.567  
3.561  
3.557  
3.230  
2.804  
2.035  
2.013  
1.993  
1.982  
1.967  
1.956  
1.854  
1.838  
1.829  
1.818  
1.683  
1.667  
1.646  
1.641  
1.630  
1.624  
1.602  
1.582

14  
<sup>1</sup>H, CDCl<sub>3</sub>, 400 MHz

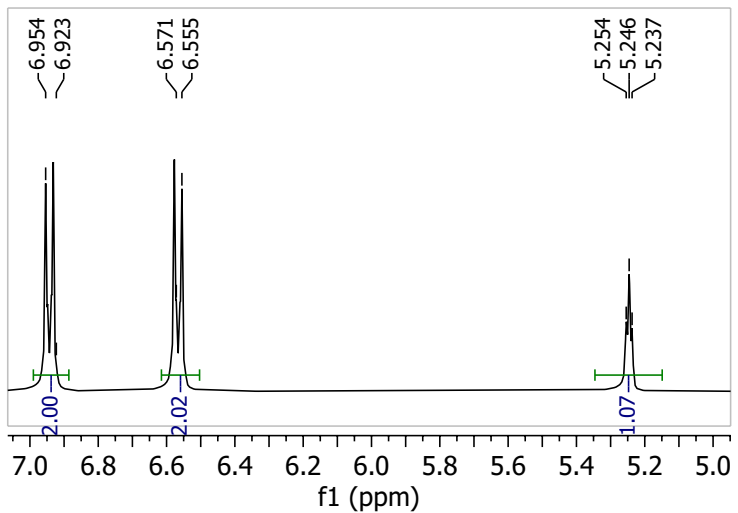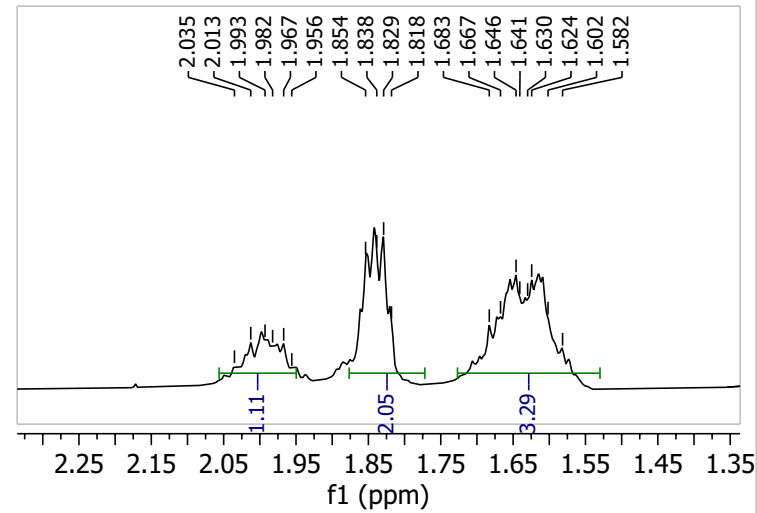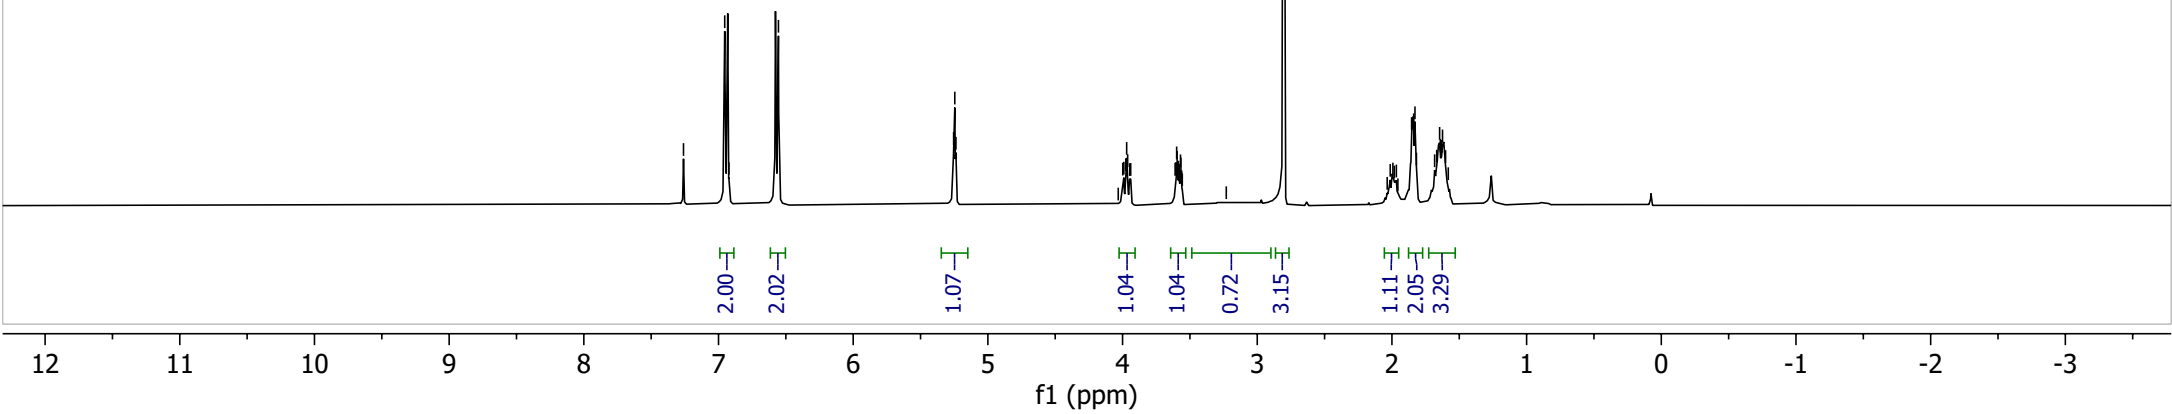



14  
<sup>13</sup>C, CDCl<sub>3</sub>, 101 MHz

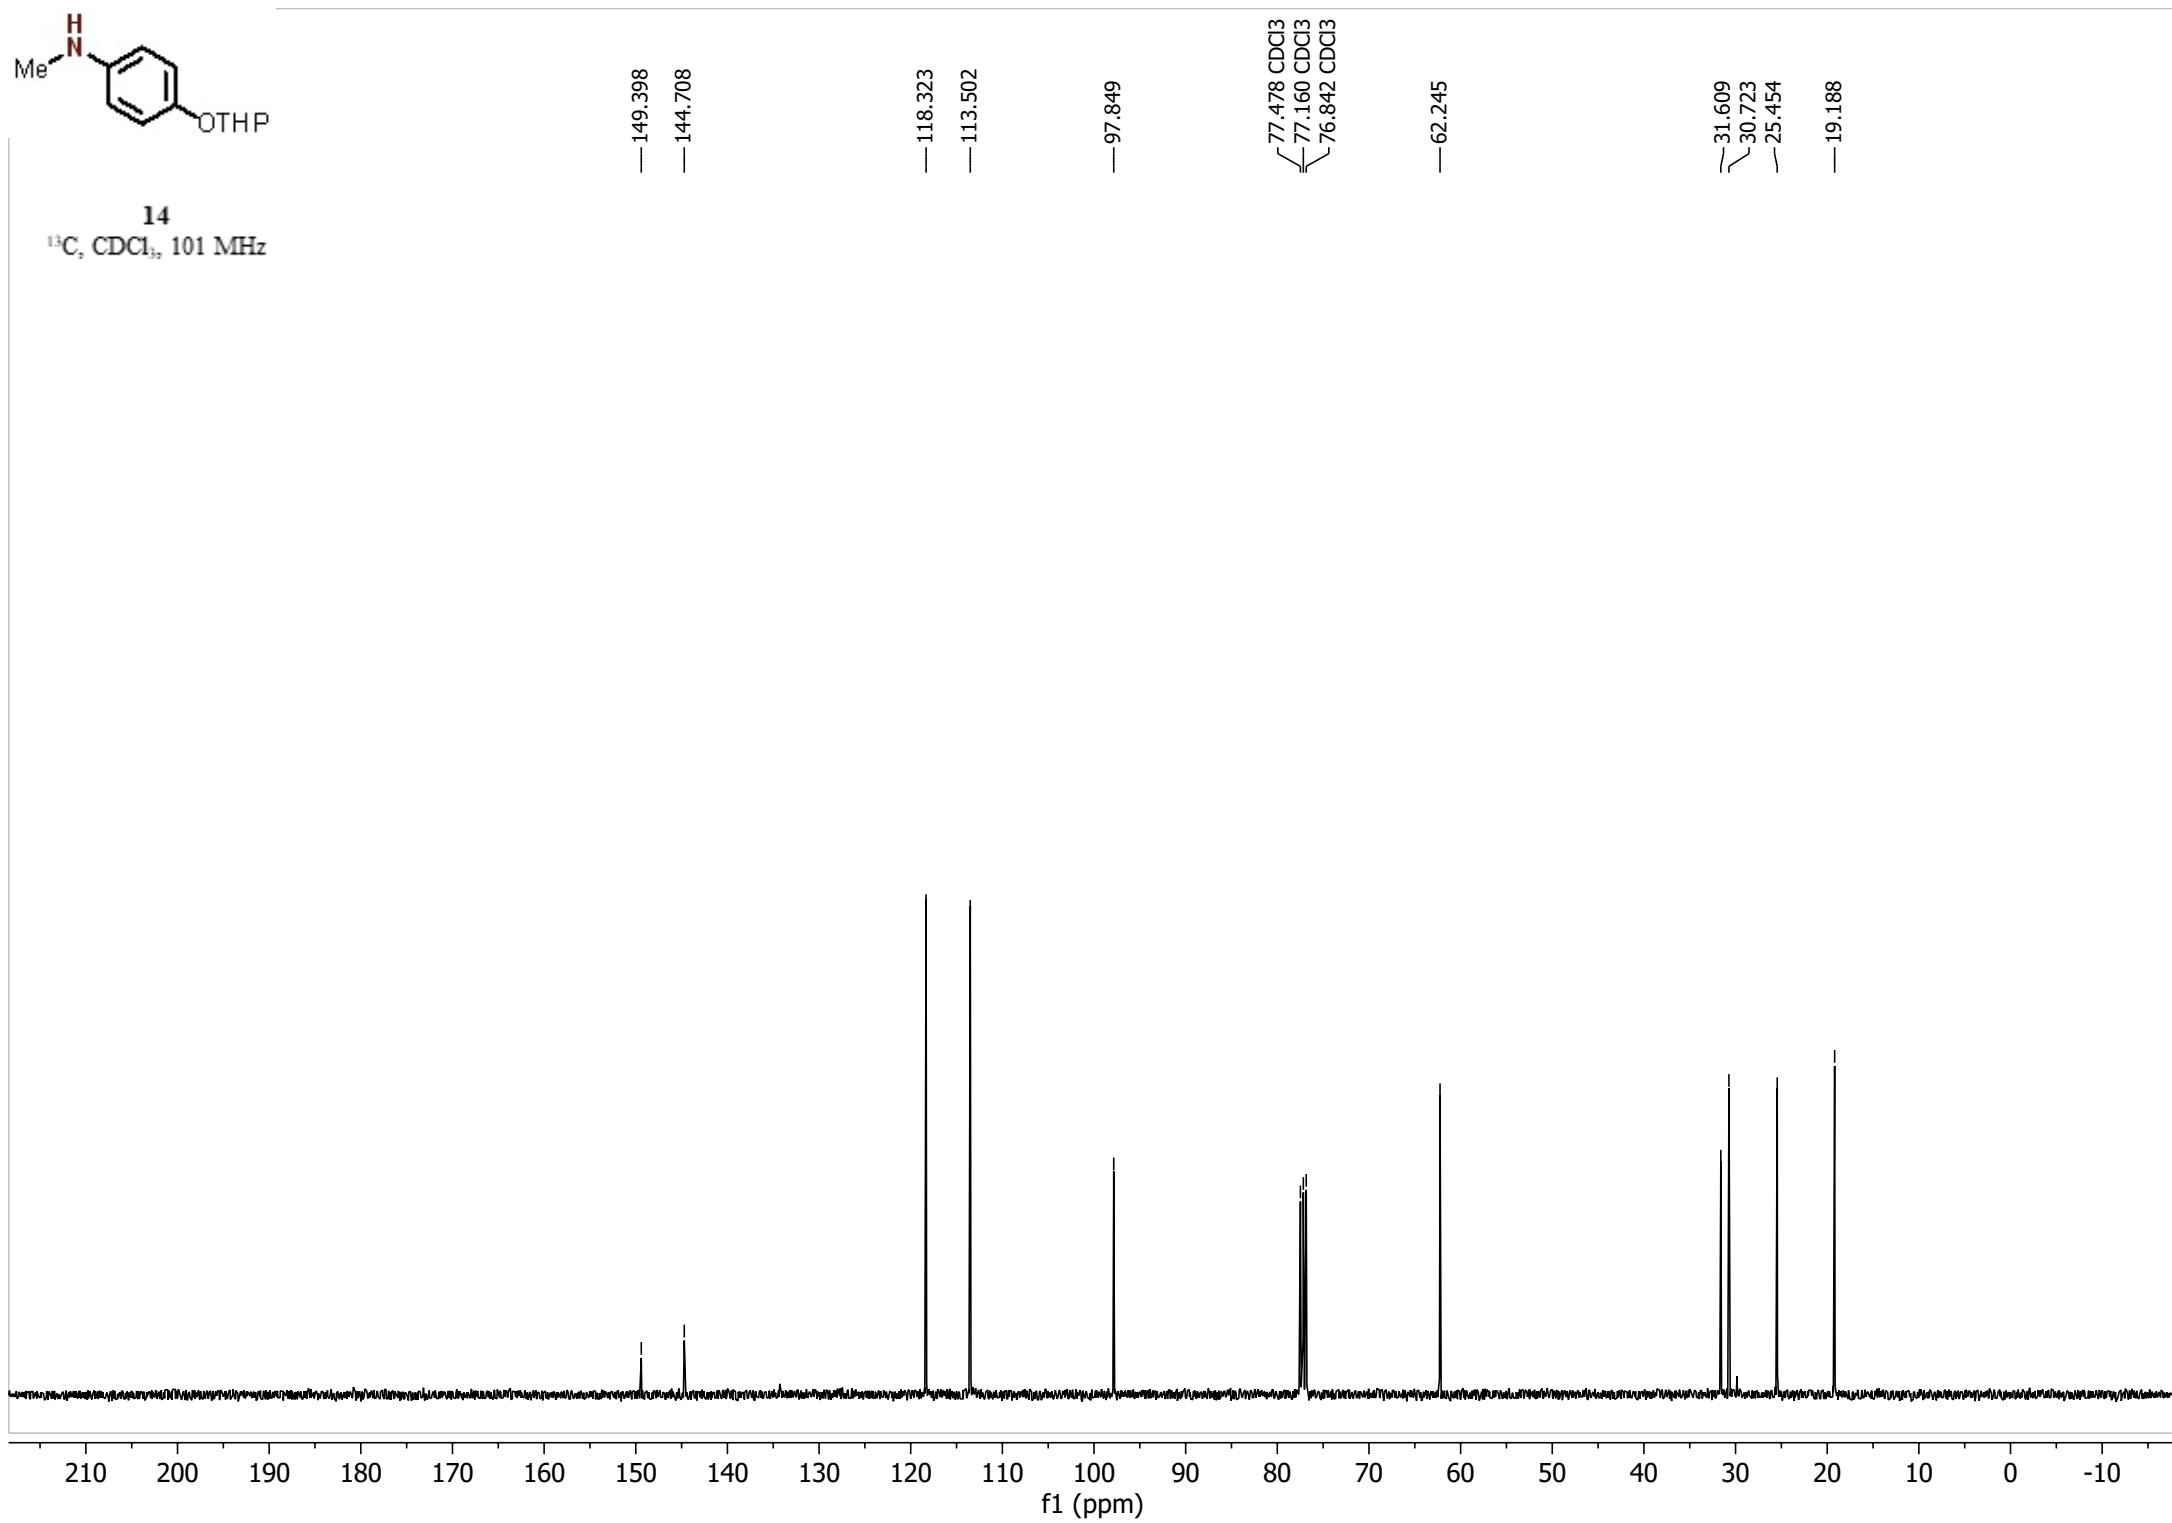



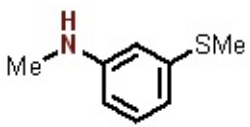

**15**  
<sup>1</sup>H, CDCl<sub>3</sub>, 400 MHz

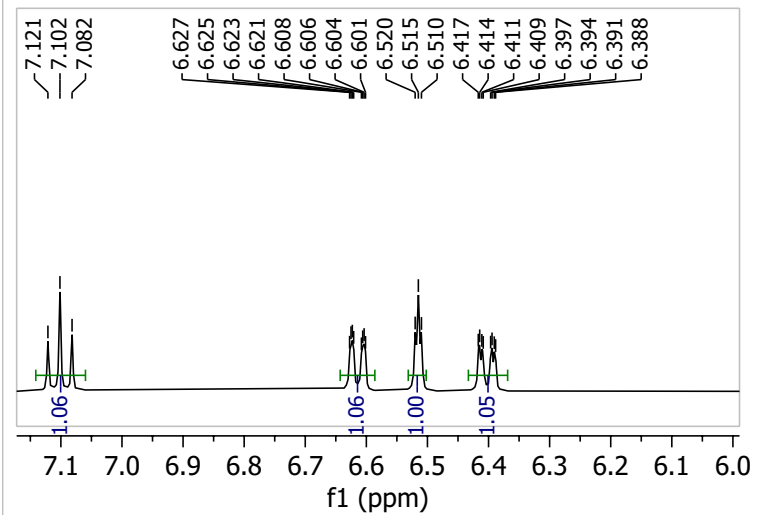

7.260 CDCl<sub>3</sub>  
7.121  
7.102  
7.082  
6.627  
6.625  
6.623  
6.621  
6.608  
6.606  
6.604  
6.601  
6.520  
6.515  
6.510  
6.417  
6.414  
6.411  
6.409  
6.397  
6.394  
6.391  
6.388

3.790

2.831

2.466

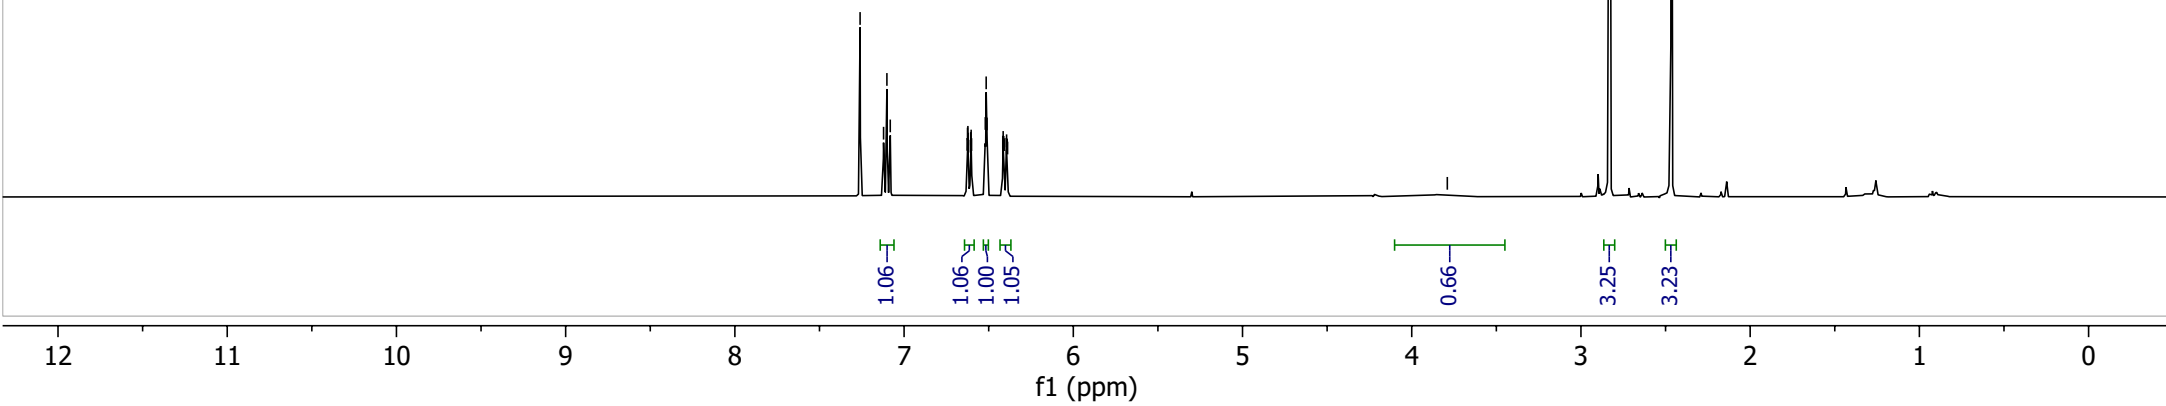

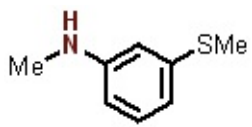

**15**  
<sup>13</sup>C, CDCl<sub>3</sub>, 101 MHz

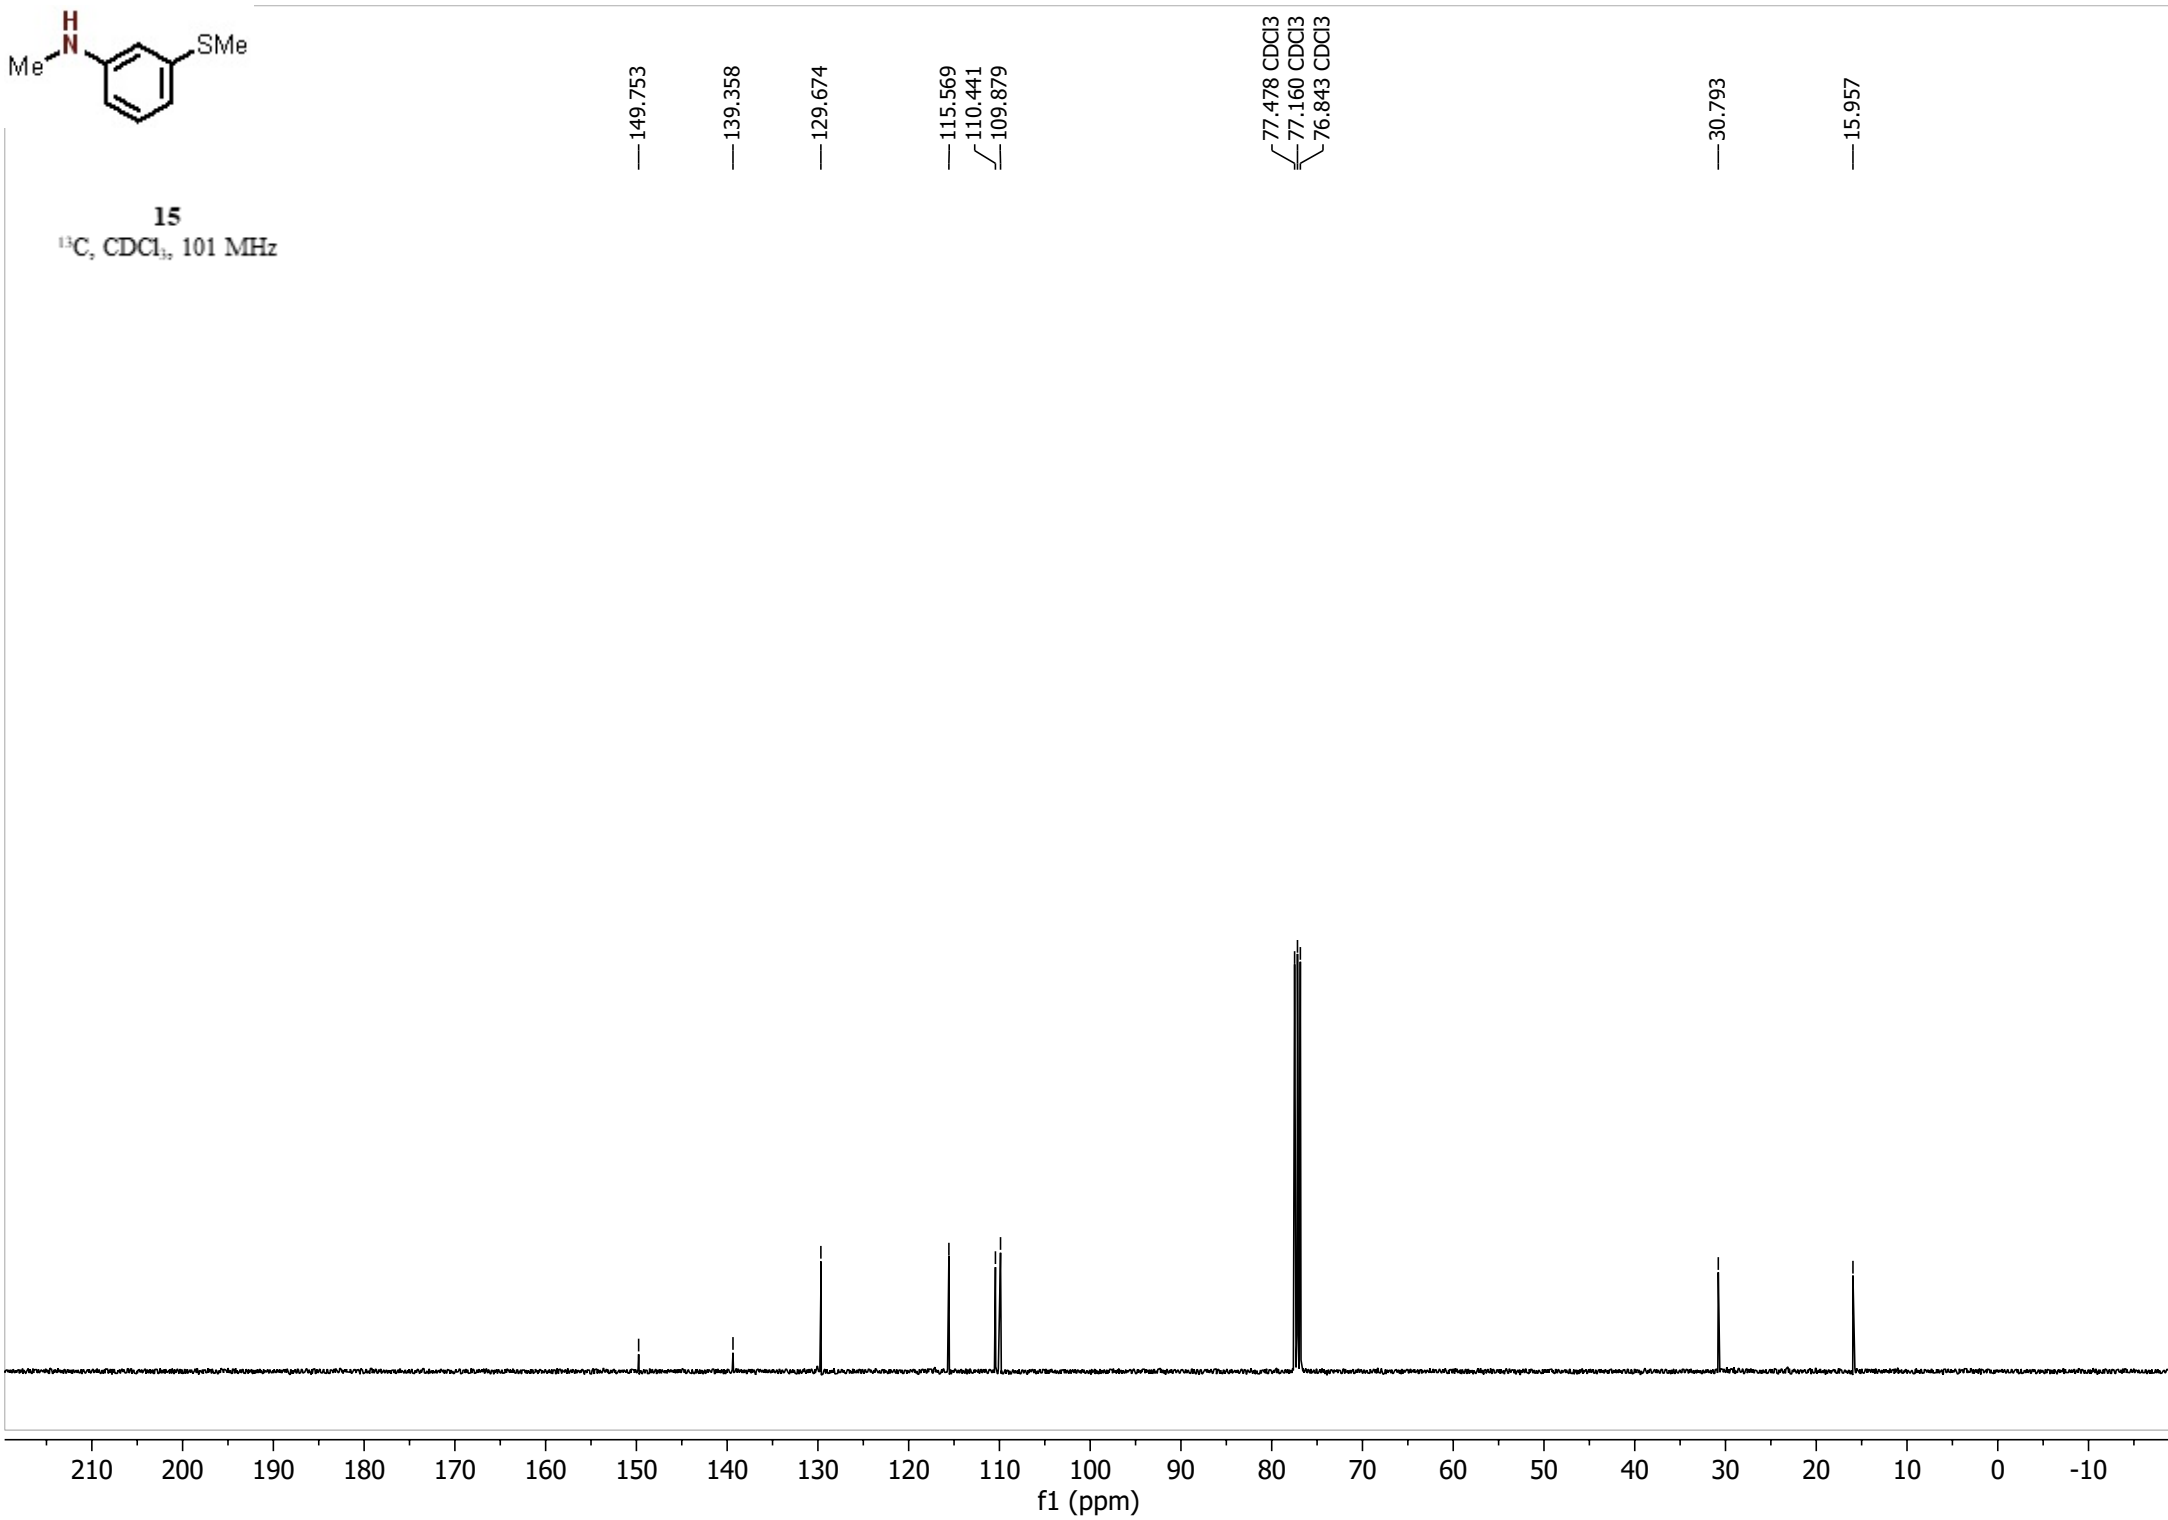

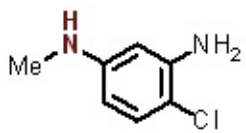

7.260 CDCl<sub>3</sub>

7.022

6.999

6.015

5.998

5.991

3.728

2.778

16

<sup>1</sup>H, CDCl<sub>3</sub>, 400 MHz

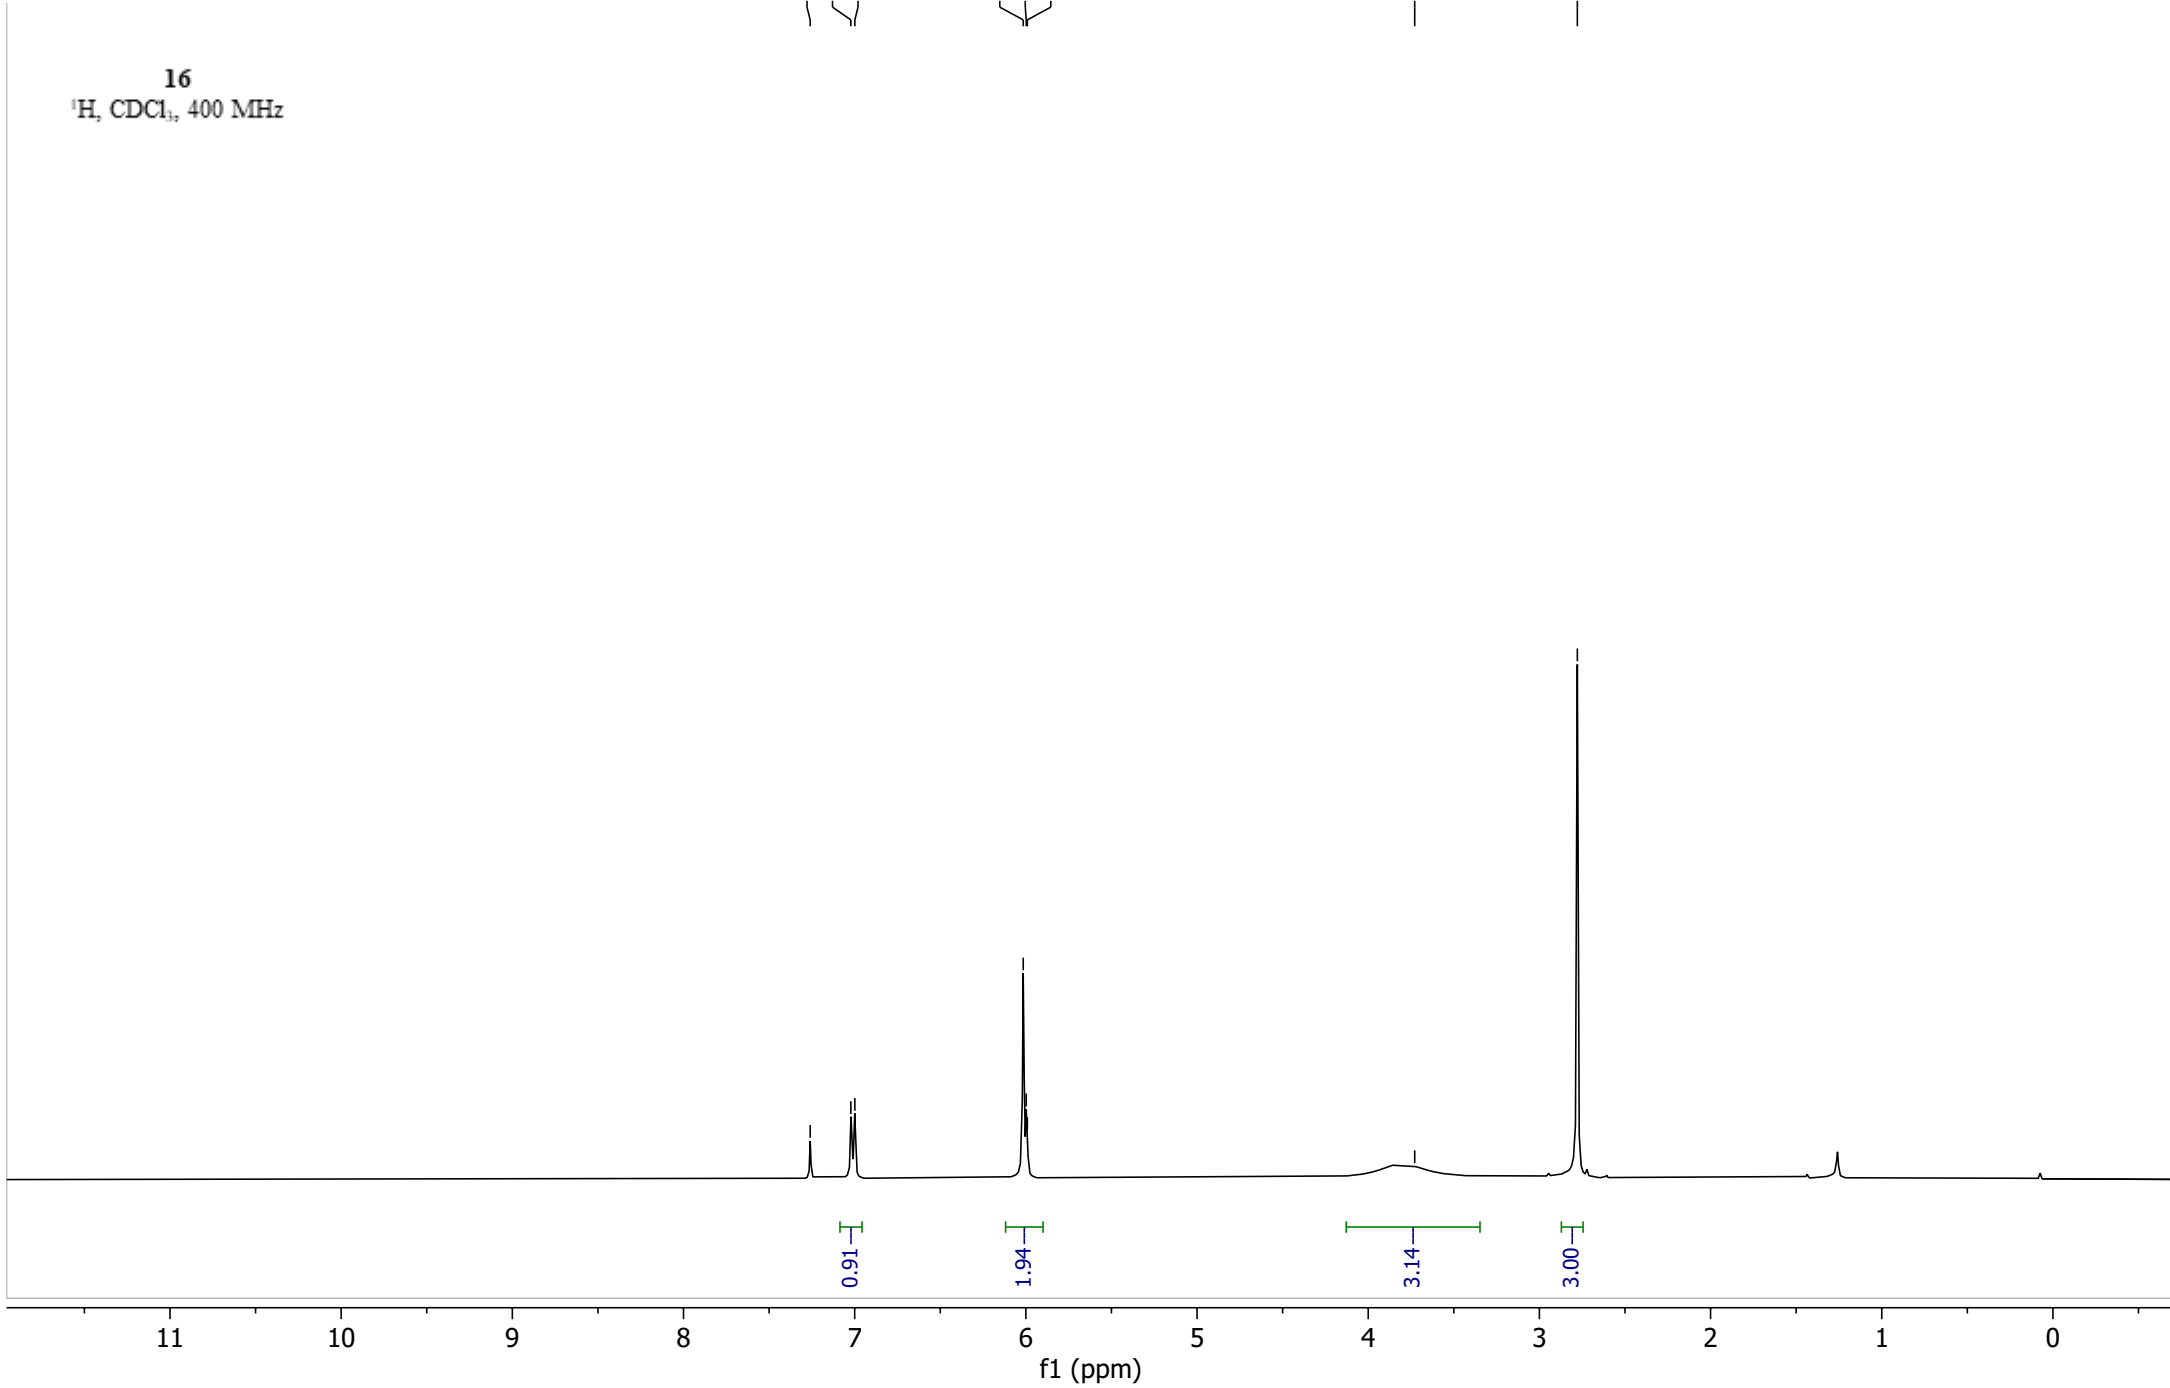



16

<sup>13</sup>C, CDCl<sub>3</sub>, 101 MHz

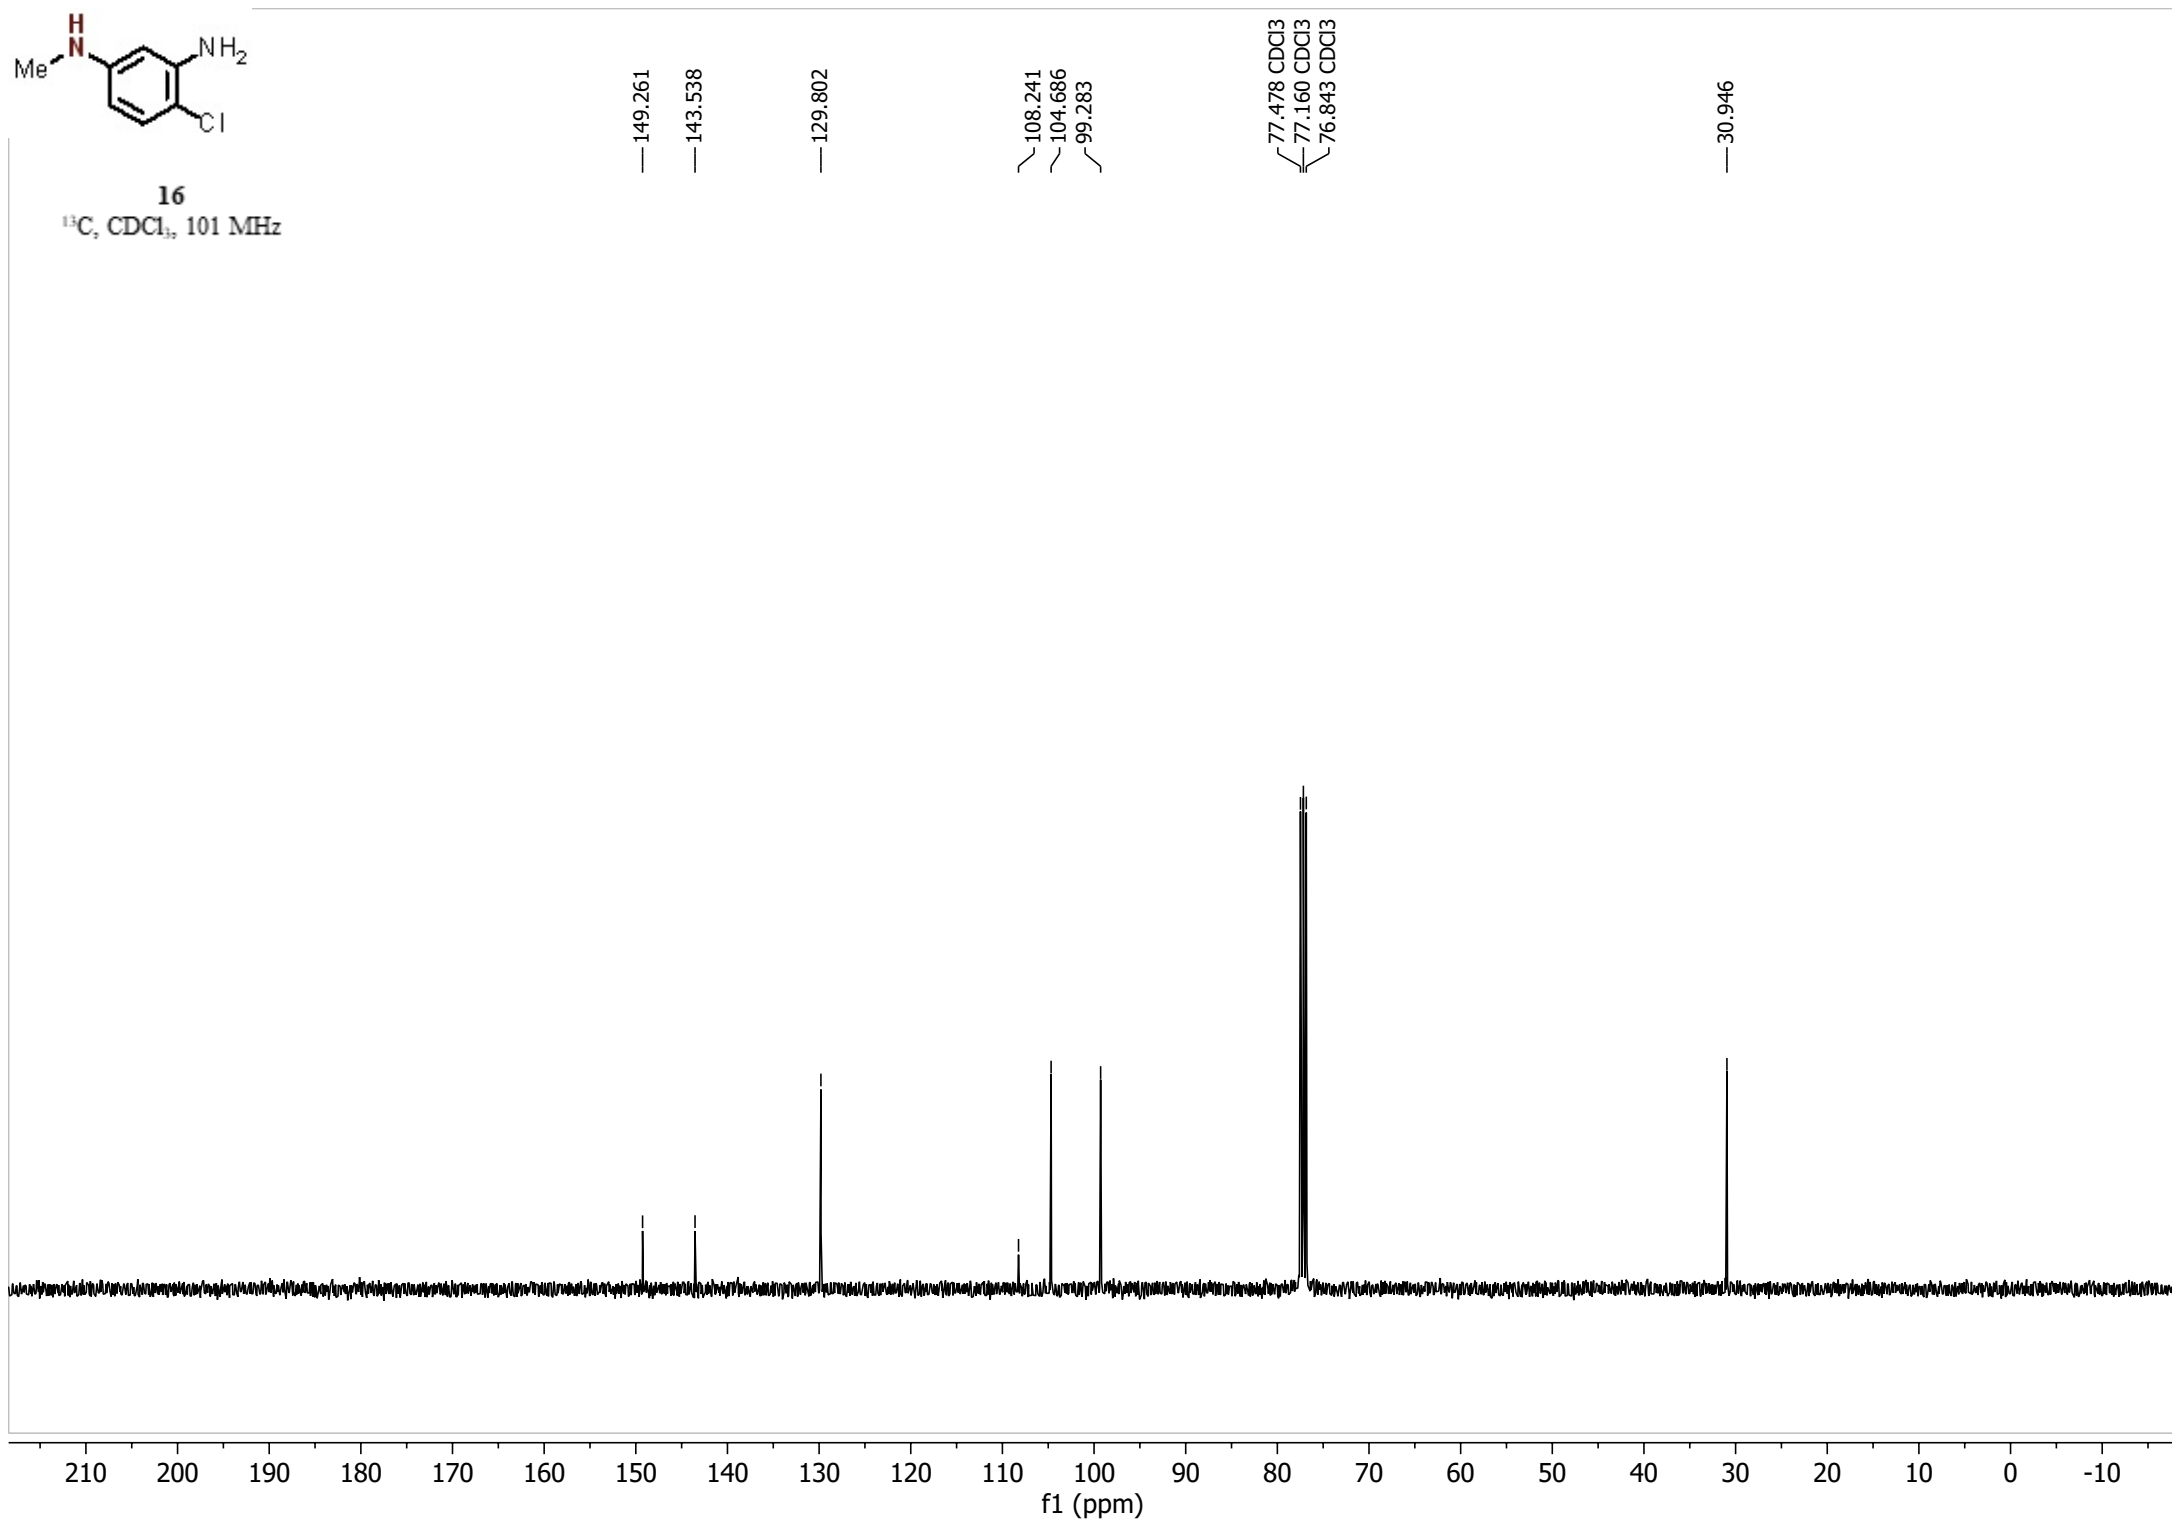

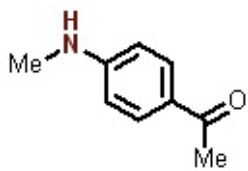

17  
'H, CDCl<sub>3</sub>, 400 MHz

7.839  
7.832  
7.828  
7.815  
7.810  
7.803  
— 7.260 CDCl<sub>3</sub>  
6.560  
6.553  
6.548  
6.536  
6.531  
6.524  
— 4.420  
2.883  
2.871  
— 2.487

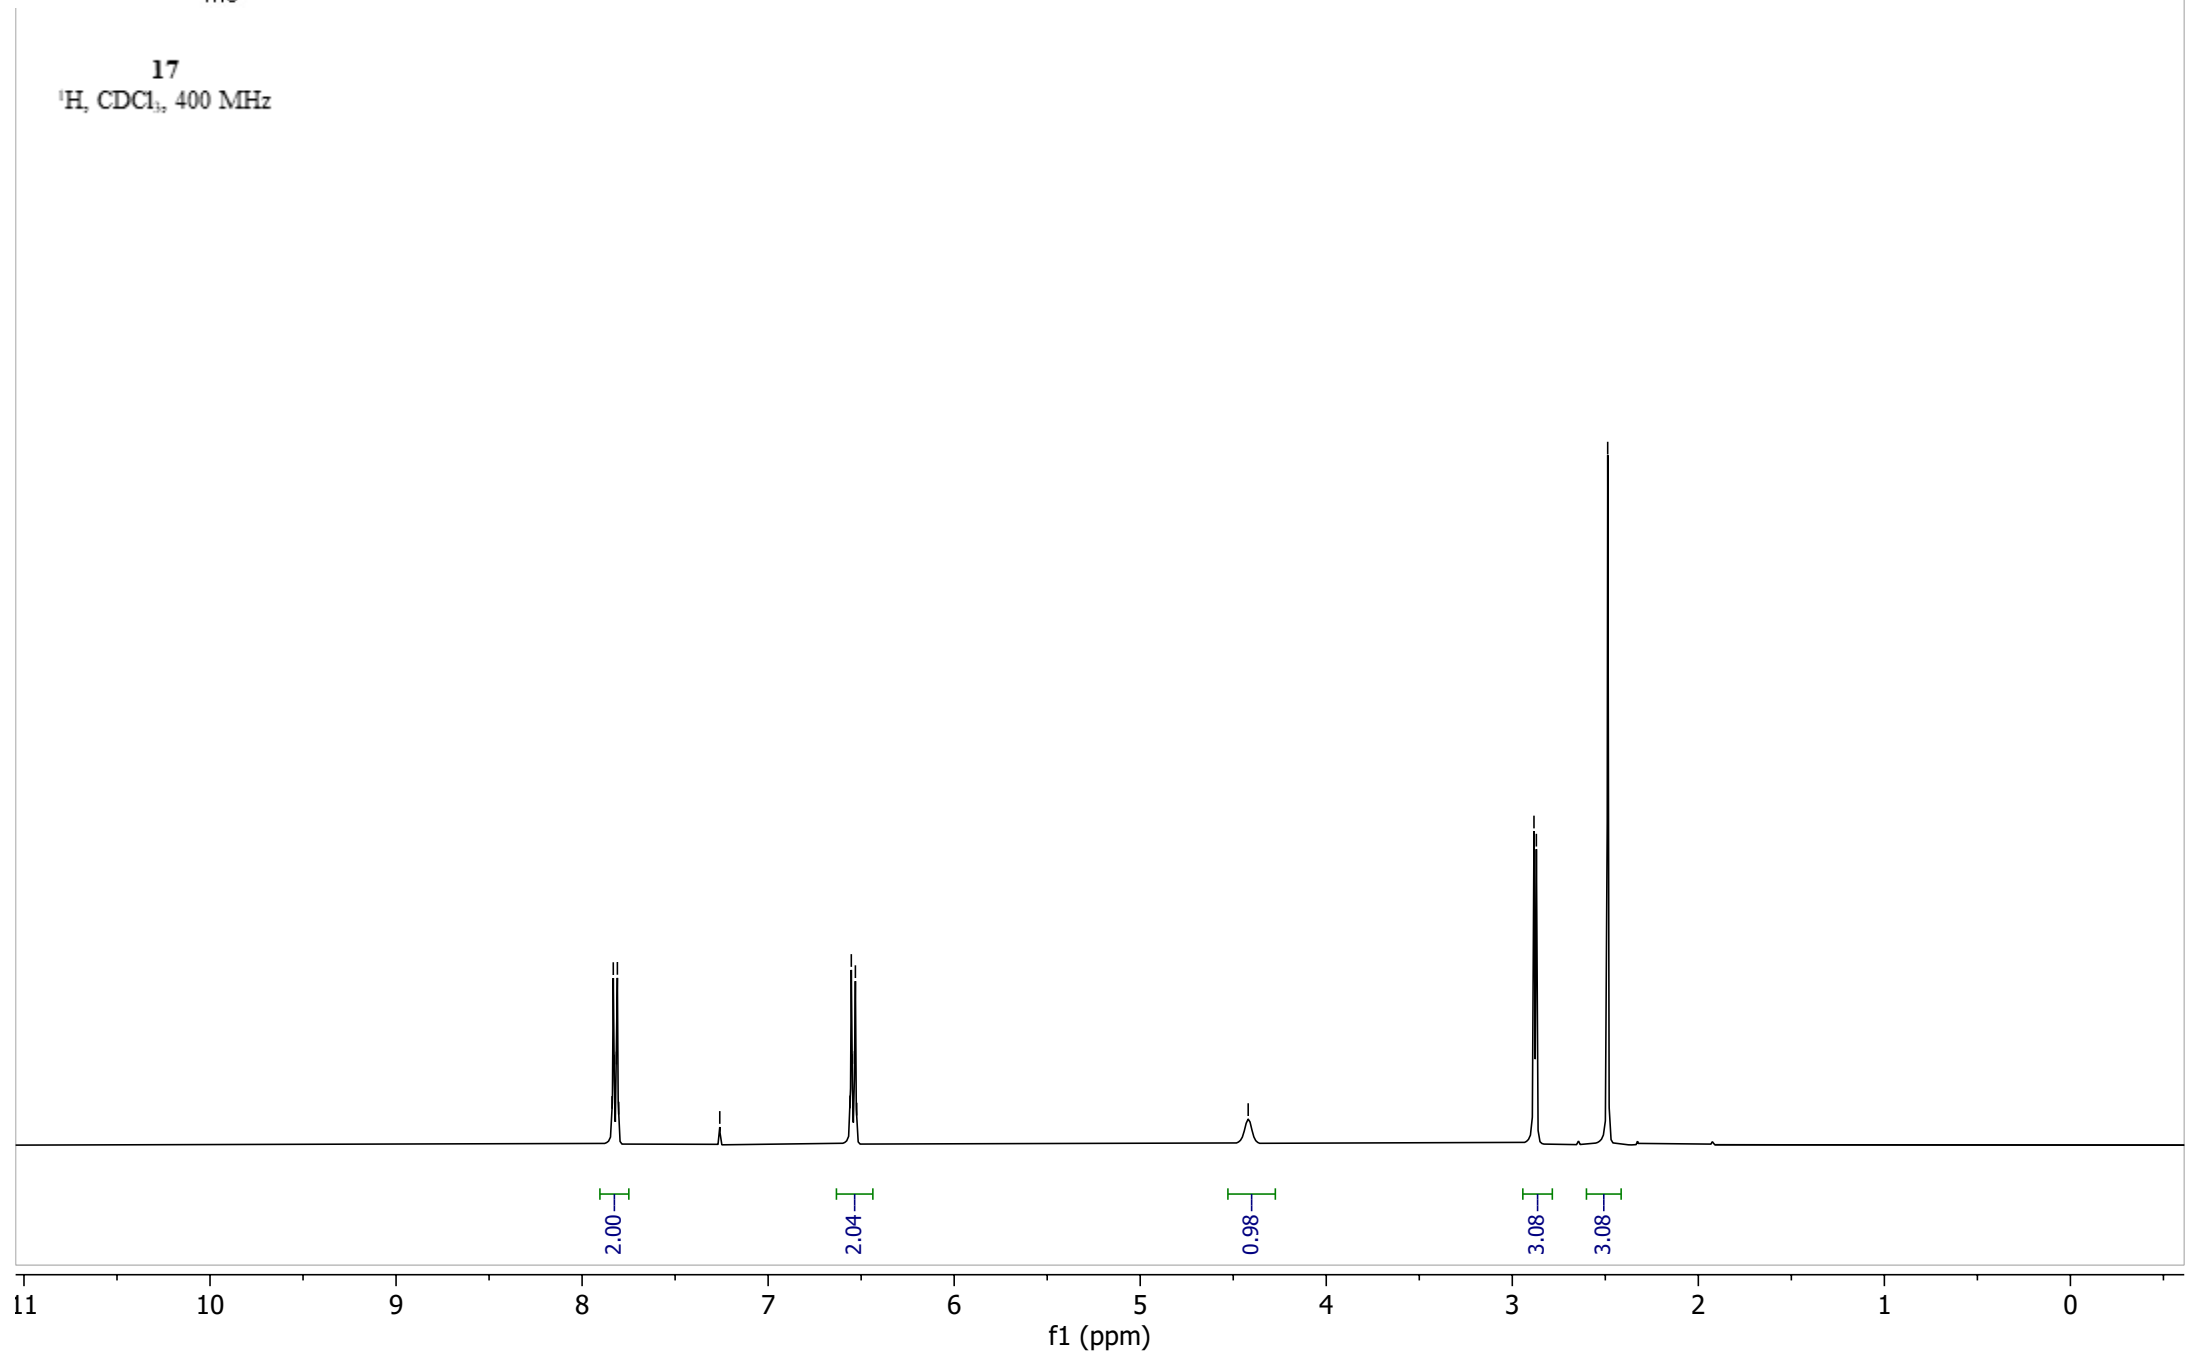

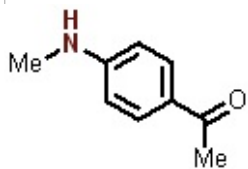

17  
 $^{13}\text{C}$ ,  $\text{CDCl}_3$ , 101 MHz

196.519

153.251

130.836

126.528

111.078

77.478  $\text{CDCl}_3$   
77.160  $\text{CDCl}_3$   
76.842  $\text{CDCl}_3$

30.133

26.074

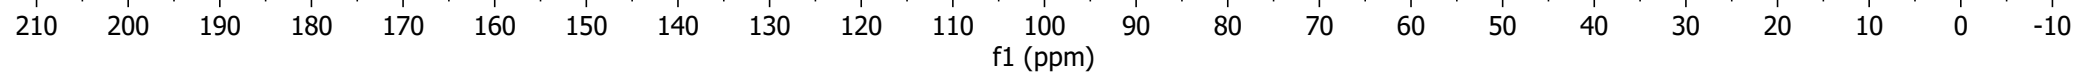

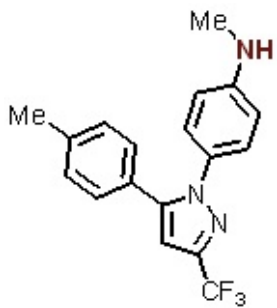

18

<sup>1</sup>H, CDCl<sub>3</sub>, 400 MHz

7.260 CDCl<sub>3</sub>  
7.142  
7.135  
7.121  
7.117  
7.113  
7.108  
7.096  
7.091  
6.678  
6.549  
6.541  
6.536  
6.524  
6.519  
6.511

— 3.889

— 2.841

— 2.340

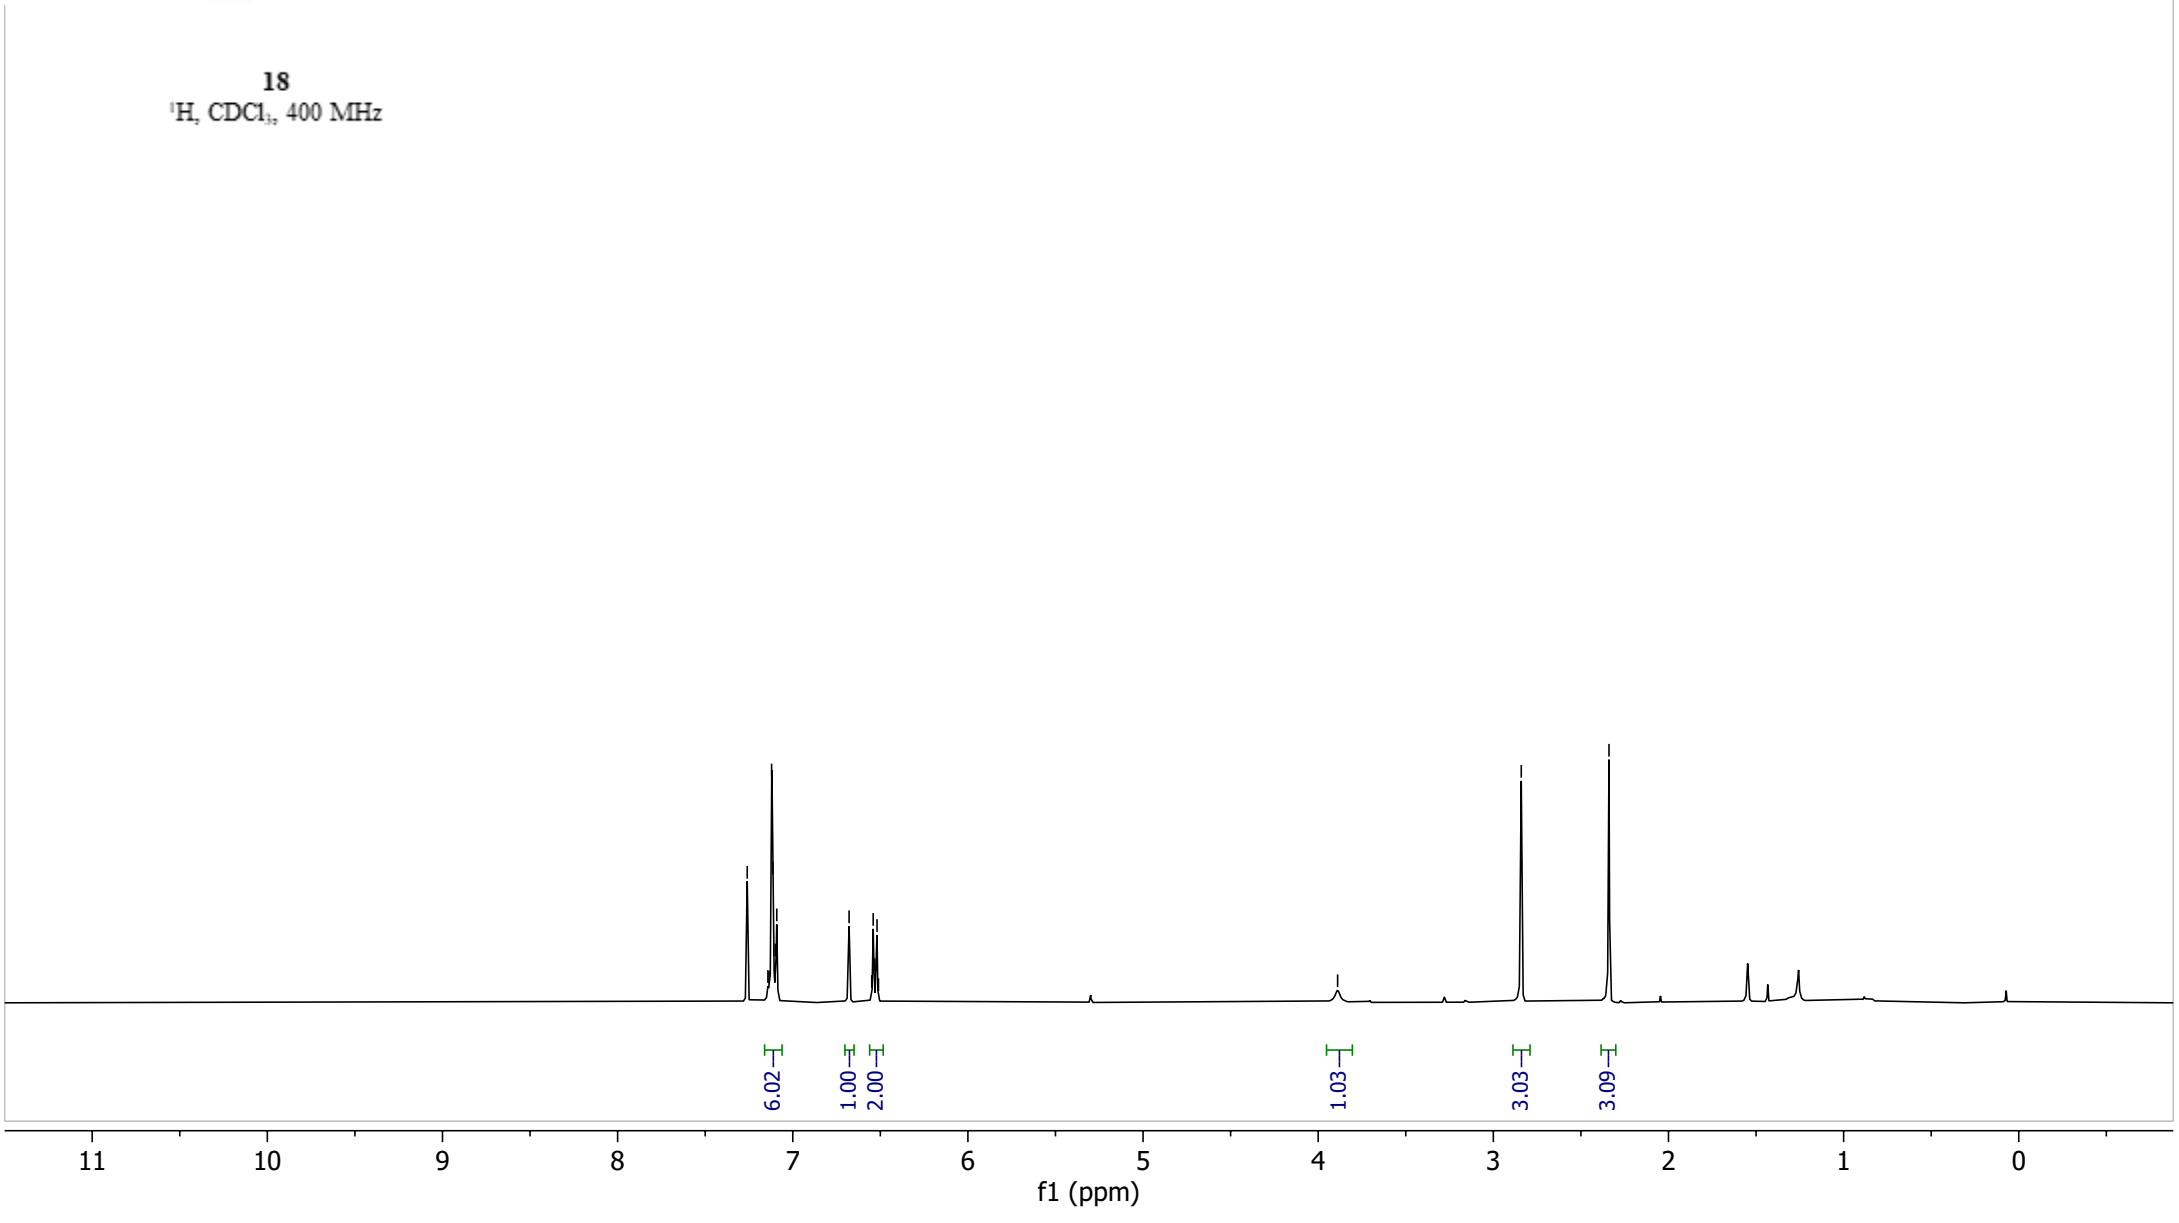

11 10 9 8 7 6 5 4 3 2 1 0

f1 (ppm)

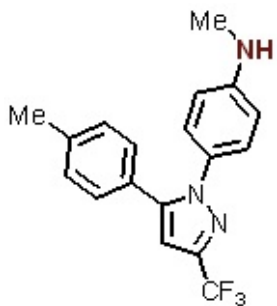

**18**

$^{13}\text{C}$ ,  $\text{CDCl}_3$ , 101 MHz

149.370  
144.594  
143.016  
142.815  
142.356  
141.953  
138.776  
129.555  
129.385  
128.716  
126.889  
126.773  
125.639  
122.962  
120.420  
117.656  
112.193  
104.674  
104.655

77.478  $\text{CDCl}_3$   
77.160  $\text{CDCl}_3$   
76.844  $\text{CDCl}_3$

30.751

21.420

210 200 190 180 170 160 150 140 130 120 110 100 90 80 70 60 50 40 30 20 10 0 -10

f1 (ppm)



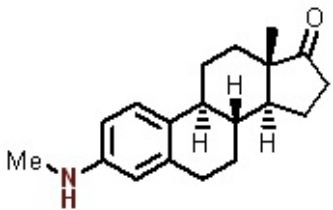

19

<sup>1</sup>H, CDCl<sub>3</sub>, 400 MHz

7.260 CDCl<sub>3</sub>  
 7.132  
 7.111  
 6.485  
 6.478  
 6.464  
 6.457  
 6.381

3.578  
 2.895  
 2.867  
 2.852  
 2.820  
 2.533  
 2.511  
 2.485  
 2.464  
 2.387  
 2.360  
 2.234  
 2.160  
 2.137  
 2.113  
 2.091  
 2.066  
 2.049  
 2.006  
 1.968  
 1.954  
 1.926  
 1.620  
 1.591  
 1.569  
 1.545  
 1.495  
 1.474  
 1.447  
 1.430  
 1.400  
 1.371

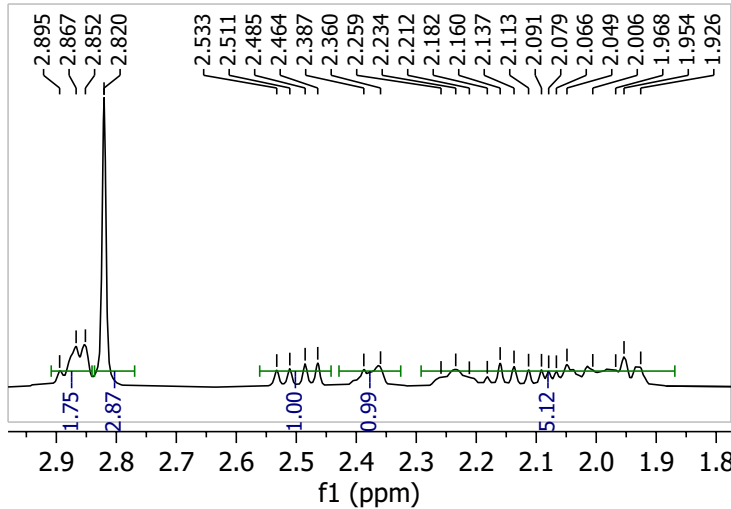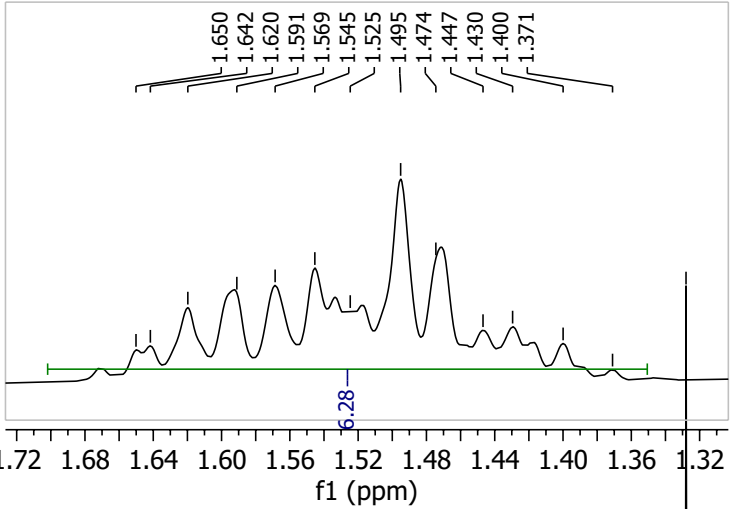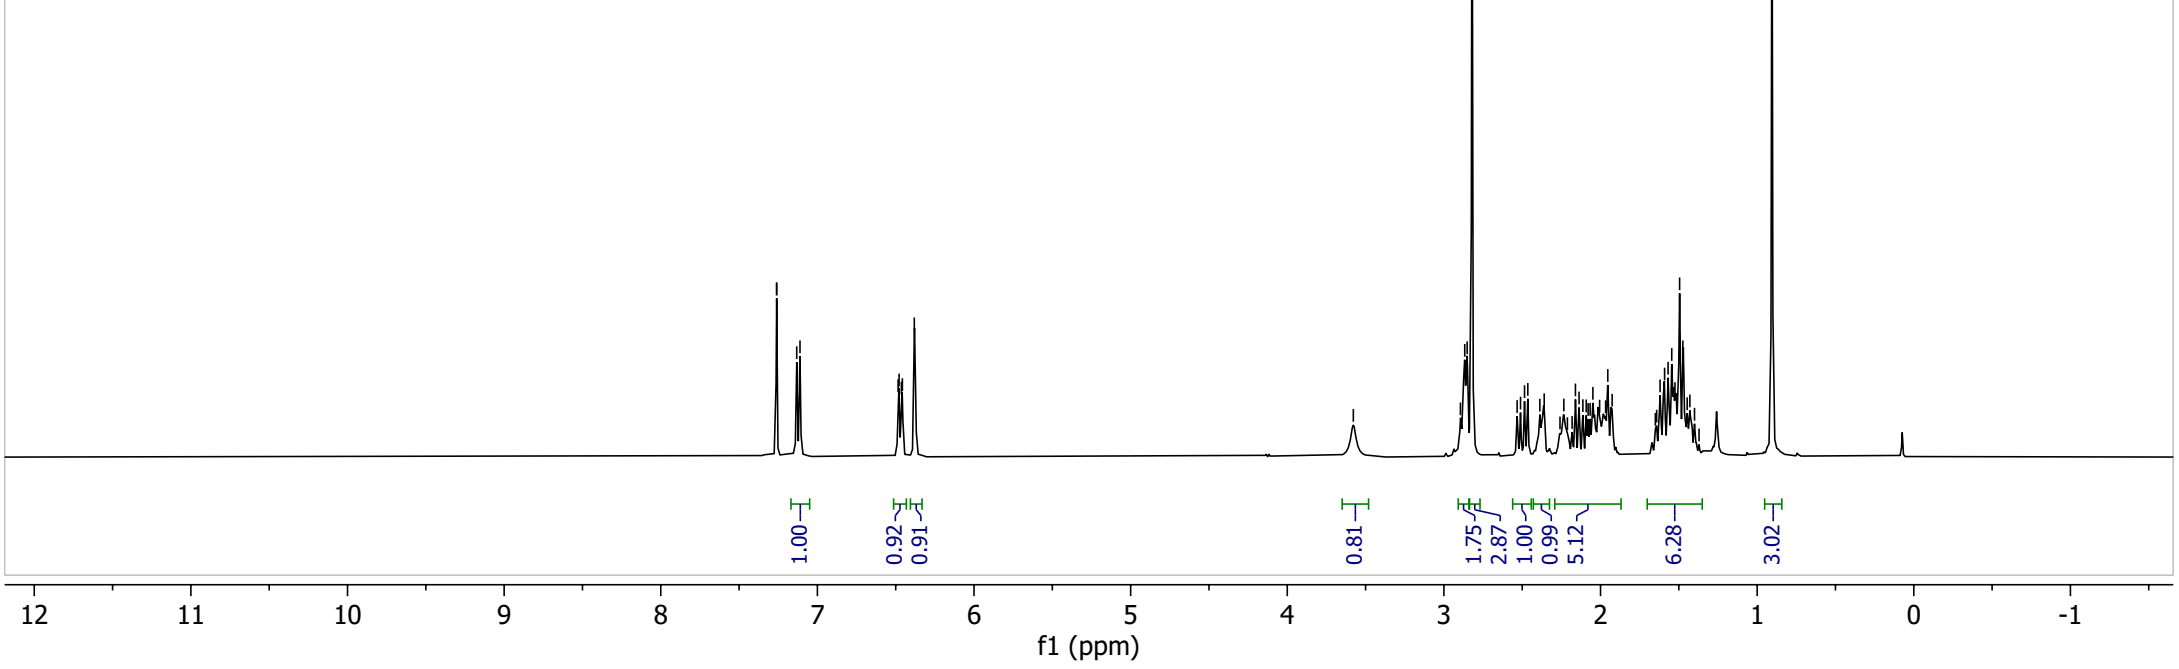

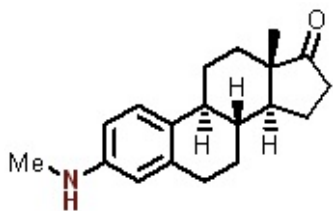

**19**  
 $^{13}\text{C}$ ,  $\text{CDCl}_3$ , 101 MHz

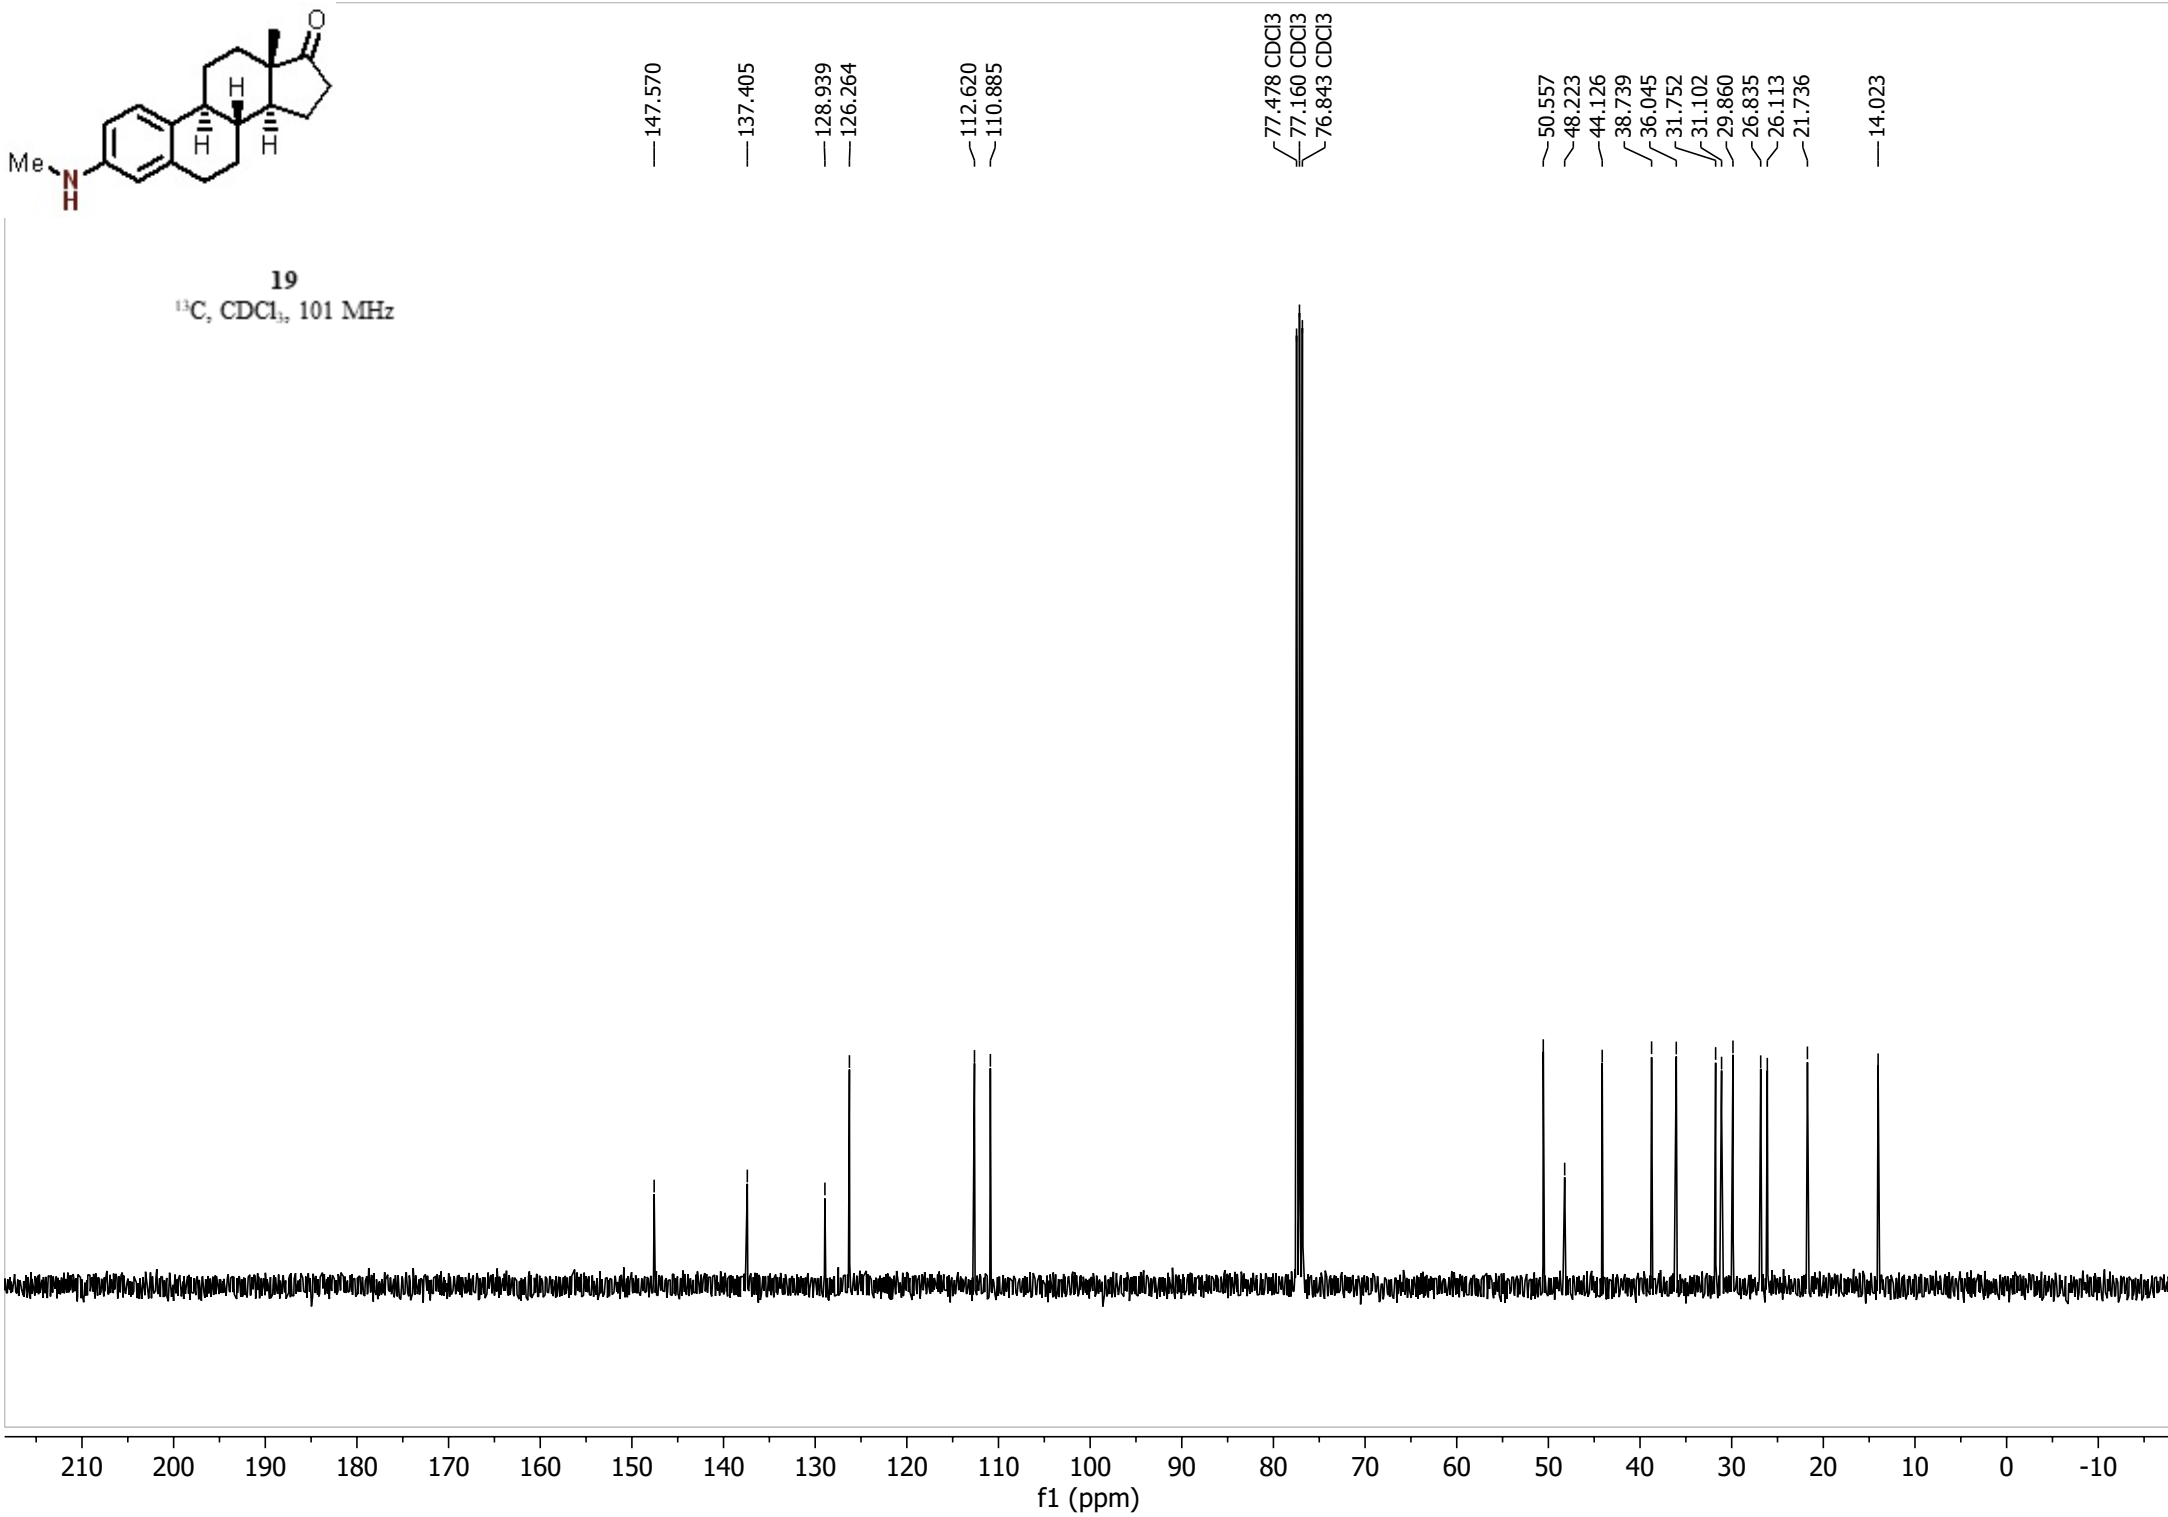

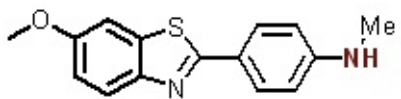

20

$^1\text{H}$ ,  $\text{CDCl}_3$ , 400 MHz

7.883  
7.873  
7.861  
7.322  
7.316  
7.260 CDCl<sub>3</sub>  
7.052  
7.045  
7.029  
7.023  
6.663  
6.656  
6.651  
6.639  
6.634  
6.627

—4.085

—2.861

—1.571 H<sub>2</sub>O

11 10 9 8 7 6 5 4 3 2 1 0

f1 (ppm)

2.95

1.02

1.00

2.06

0.85

3.21

3.08

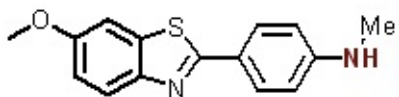

20

$^{13}\text{C}$ ,  $\text{CDCl}_3$ , 101 MHz

— 166.825

— 157.276

— 151.384

— 149.029

— 135.946

— 128.877

— 122.945

— 122.915

— 115.079

— 112.192

— 104.504

77.477  $\text{CDCl}_3$

77.160  $\text{CDCl}_3$

76.842  $\text{CDCl}_3$

— 55.948

— 30.507

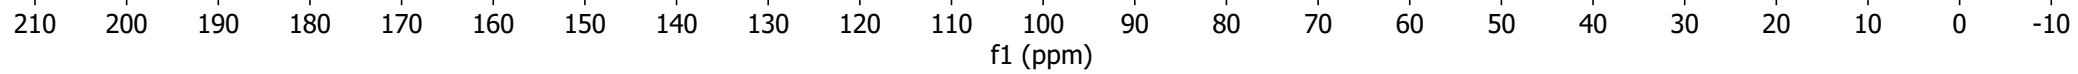

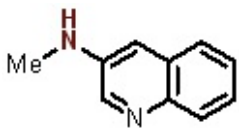

21

<sup>1</sup>H, CDCl<sub>3</sub>, 400 MHz

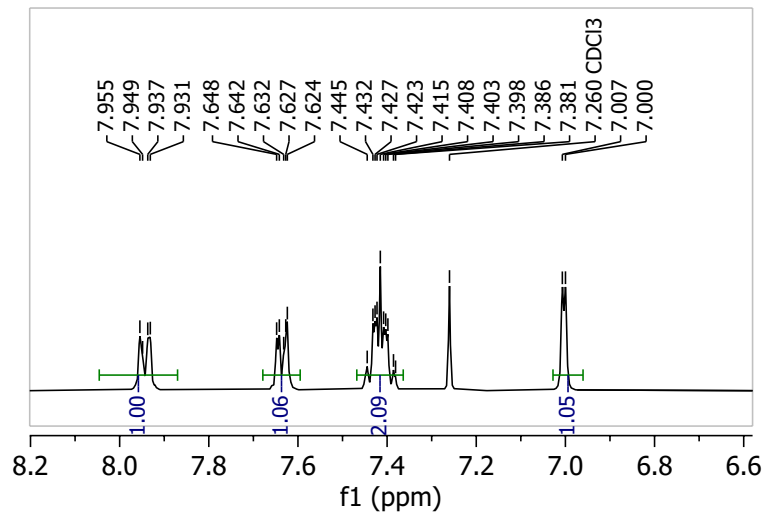

9.360

8.442

8.435

7.955

7.949

7.937

7.931

7.648

7.642

7.632

7.627

7.624

7.445

7.432

7.427

7.423

7.415

7.408

7.403

7.398

7.386

7.381

7.260 CDCl<sub>3</sub>

7.007

7.000

4.061

2.950

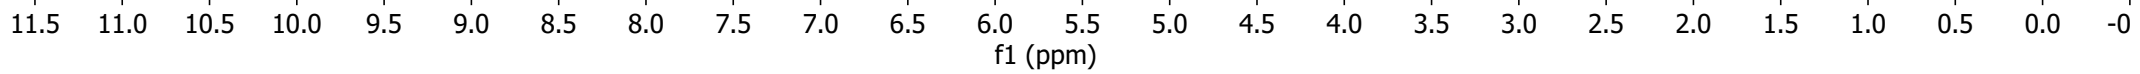

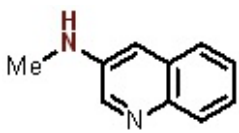

21

$^{13}\text{C}$ ,  $\text{CDCl}_3$ , 101 MHz

143.450  
142.724  
142.198

129.719  
129.152  
127.058  
126.069  
124.964

109.635

77.476 CDCl3  
77.160 CDCl3  
76.841 CDCl3

30.483

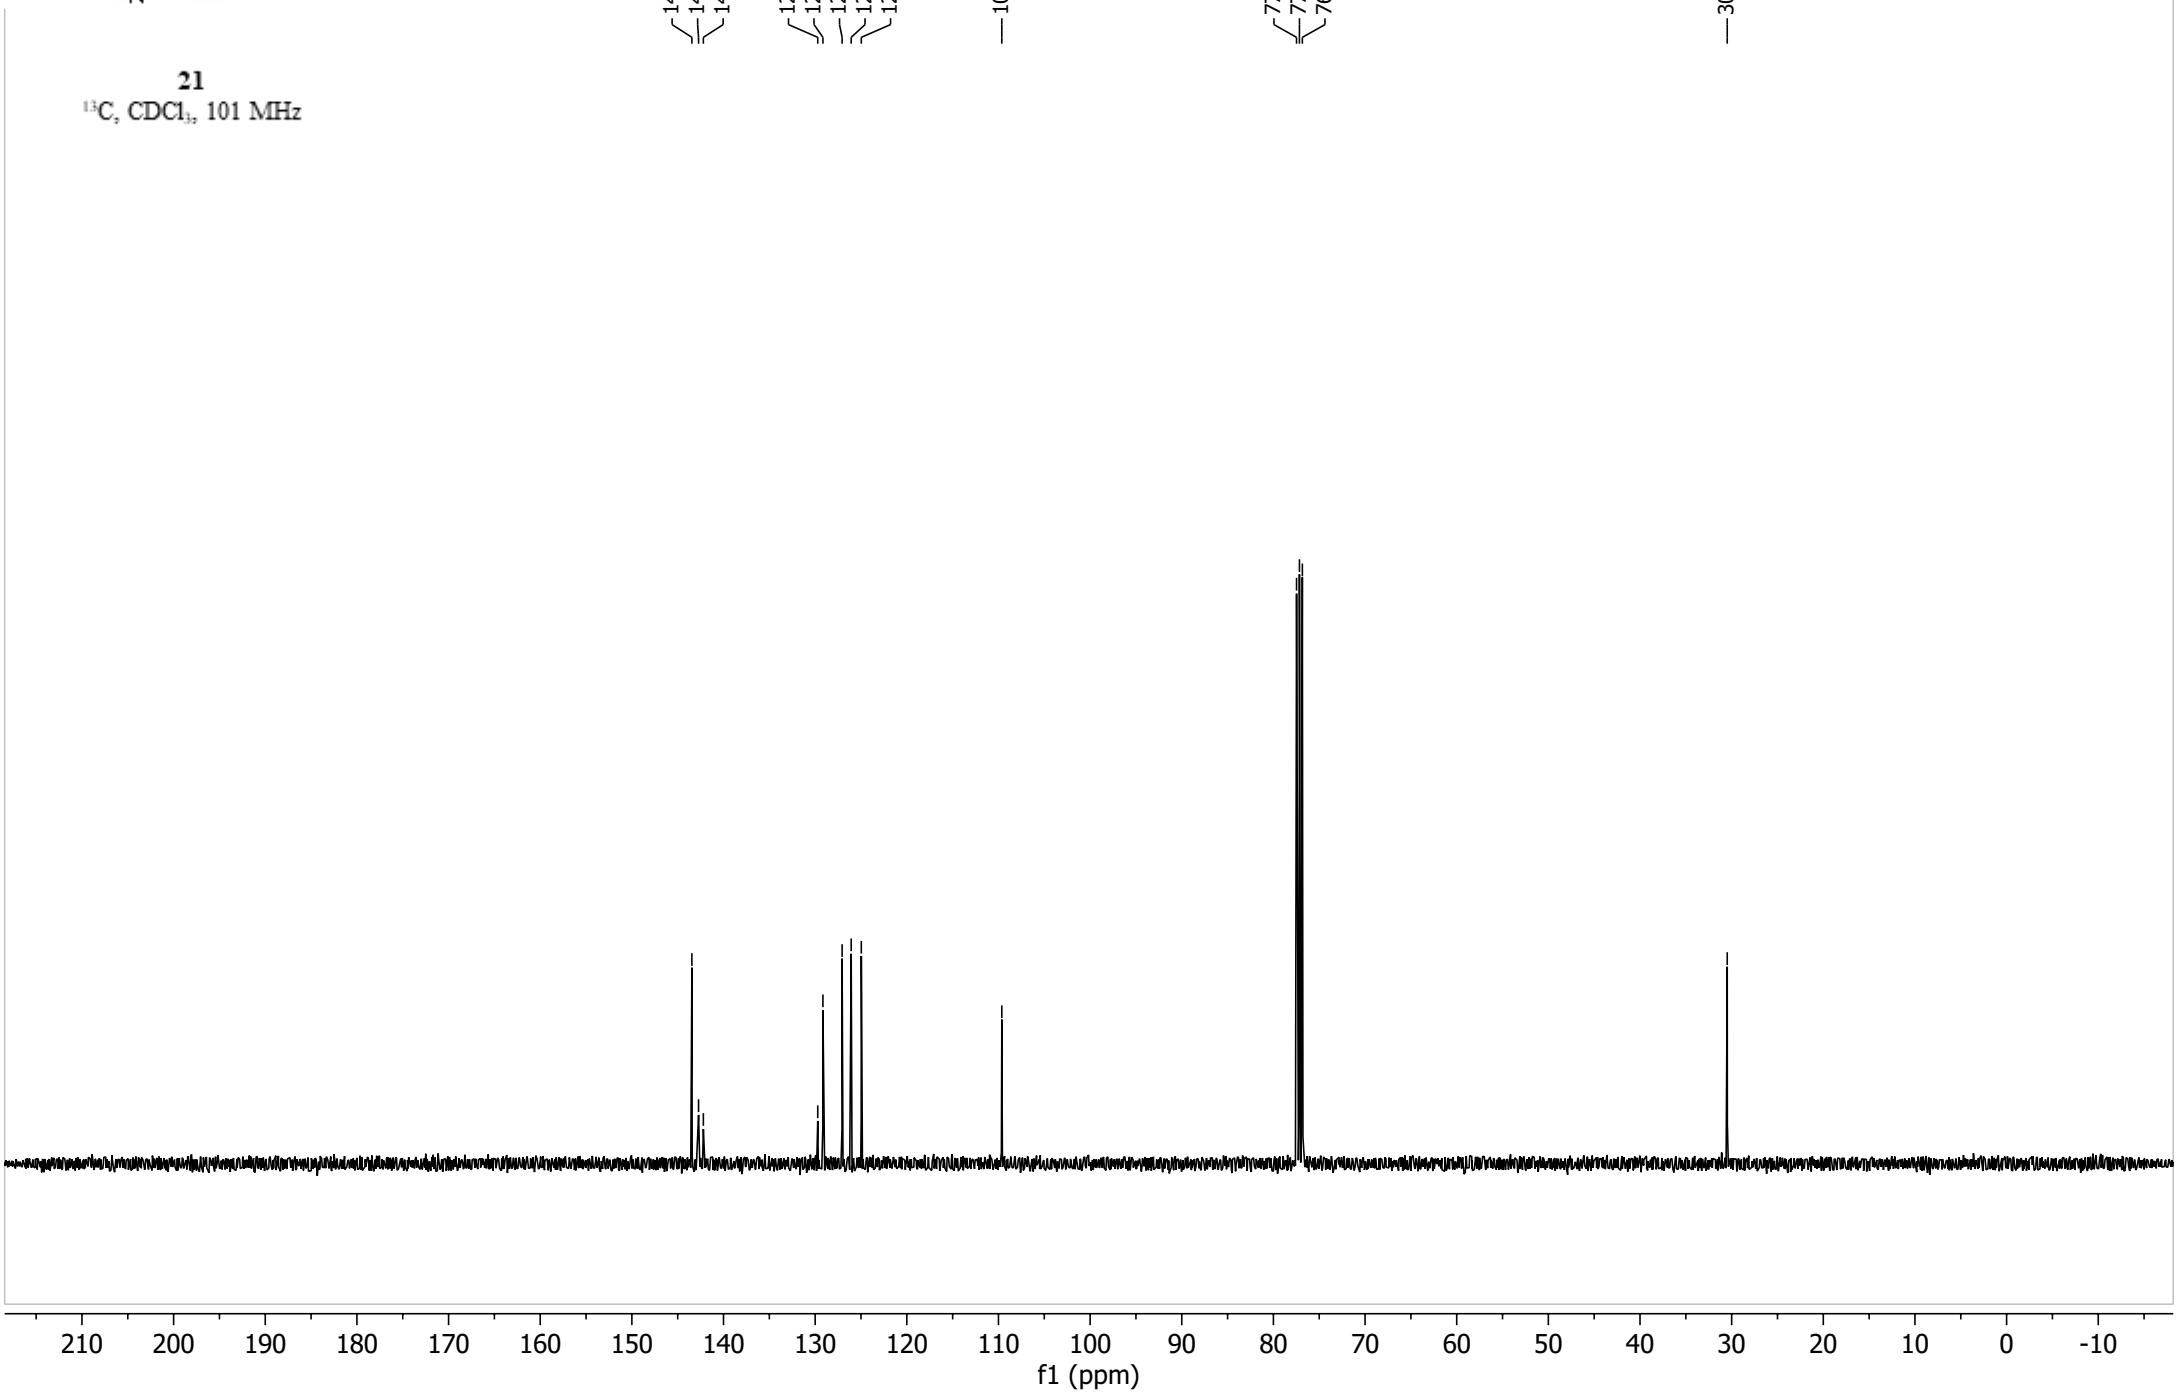

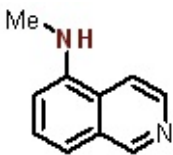

22

<sup>1</sup>H, CDCl<sub>3</sub>, 400 MHz

9.162  
8.468  
8.453  
7.548  
7.533  
7.506  
7.486  
7.466  
7.330  
7.309  
7.260 CDCl<sub>3</sub>  
6.752  
6.734  
4.452  
3.015

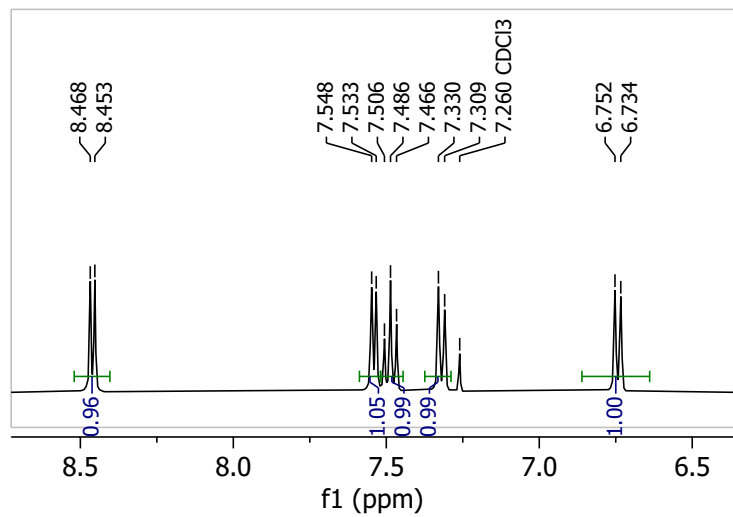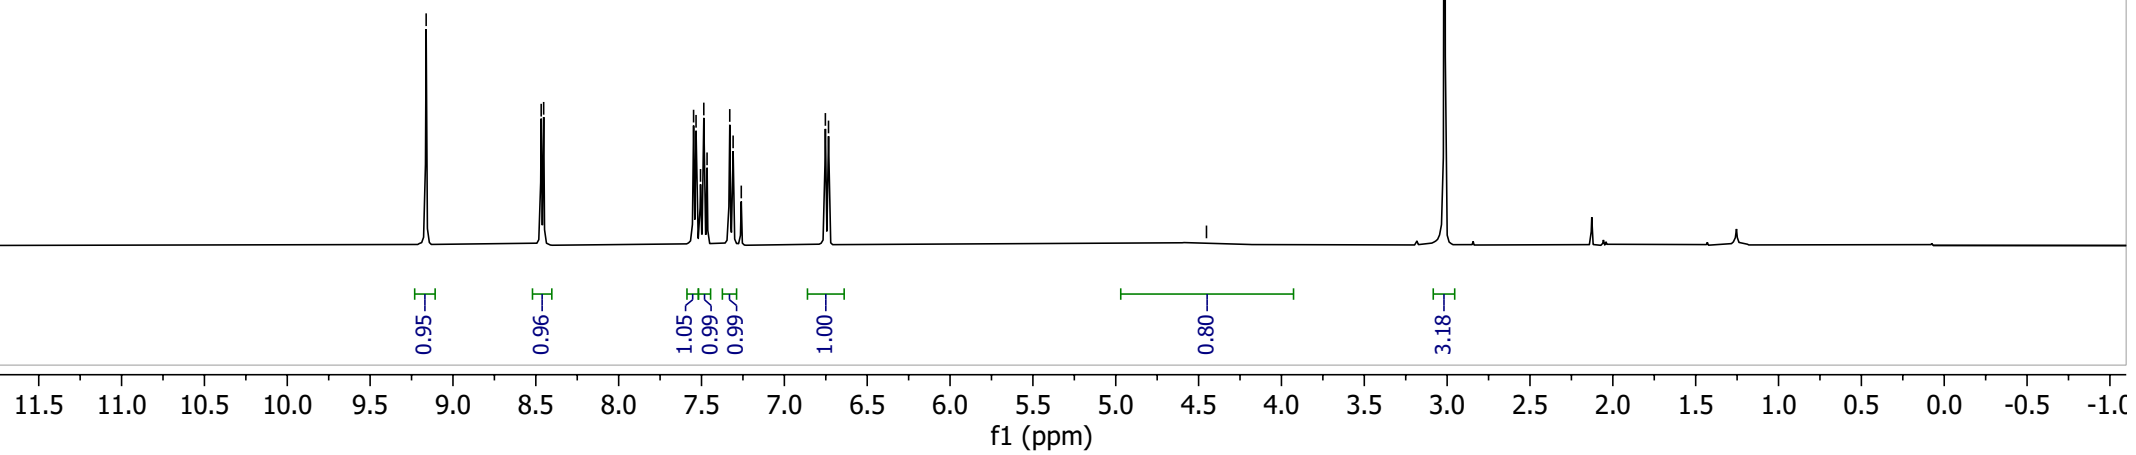

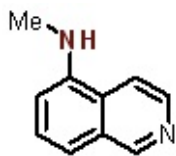

22

$^{13}\text{C}$ ,  $\text{CDCl}_3$ , 101 MHz

— 152.965

— 143.680

— 142.013

— 129.394

— 128.317

— 126.147

— 116.120

— 113.479

— 107.154

77.478,  $\text{CDCl}_3$

77.160,  $\text{CDCl}_3$

76.842,  $\text{CDCl}_3$

— 30.883

210 200 190 180 170 160 150 140 130 120 110 100 90 80 70 60 50 40 30 20 10 0 -10

f1 (ppm)



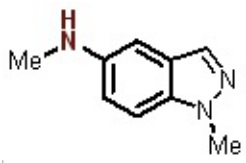

23  
<sup>1</sup>H, CDCl<sub>3</sub>, 400 MHz

7.899  
7.619  
7.615  
7.612  
7.340  
7.335  
7.260 CDCl<sub>3</sub>

4.009

3.003

1.00

1.05

2.19

3.14

3.12

15 14 13 12 11 10 9 8 7 6 5 4 3 2 1 0 -1 -2 -3  
f1 (ppm)

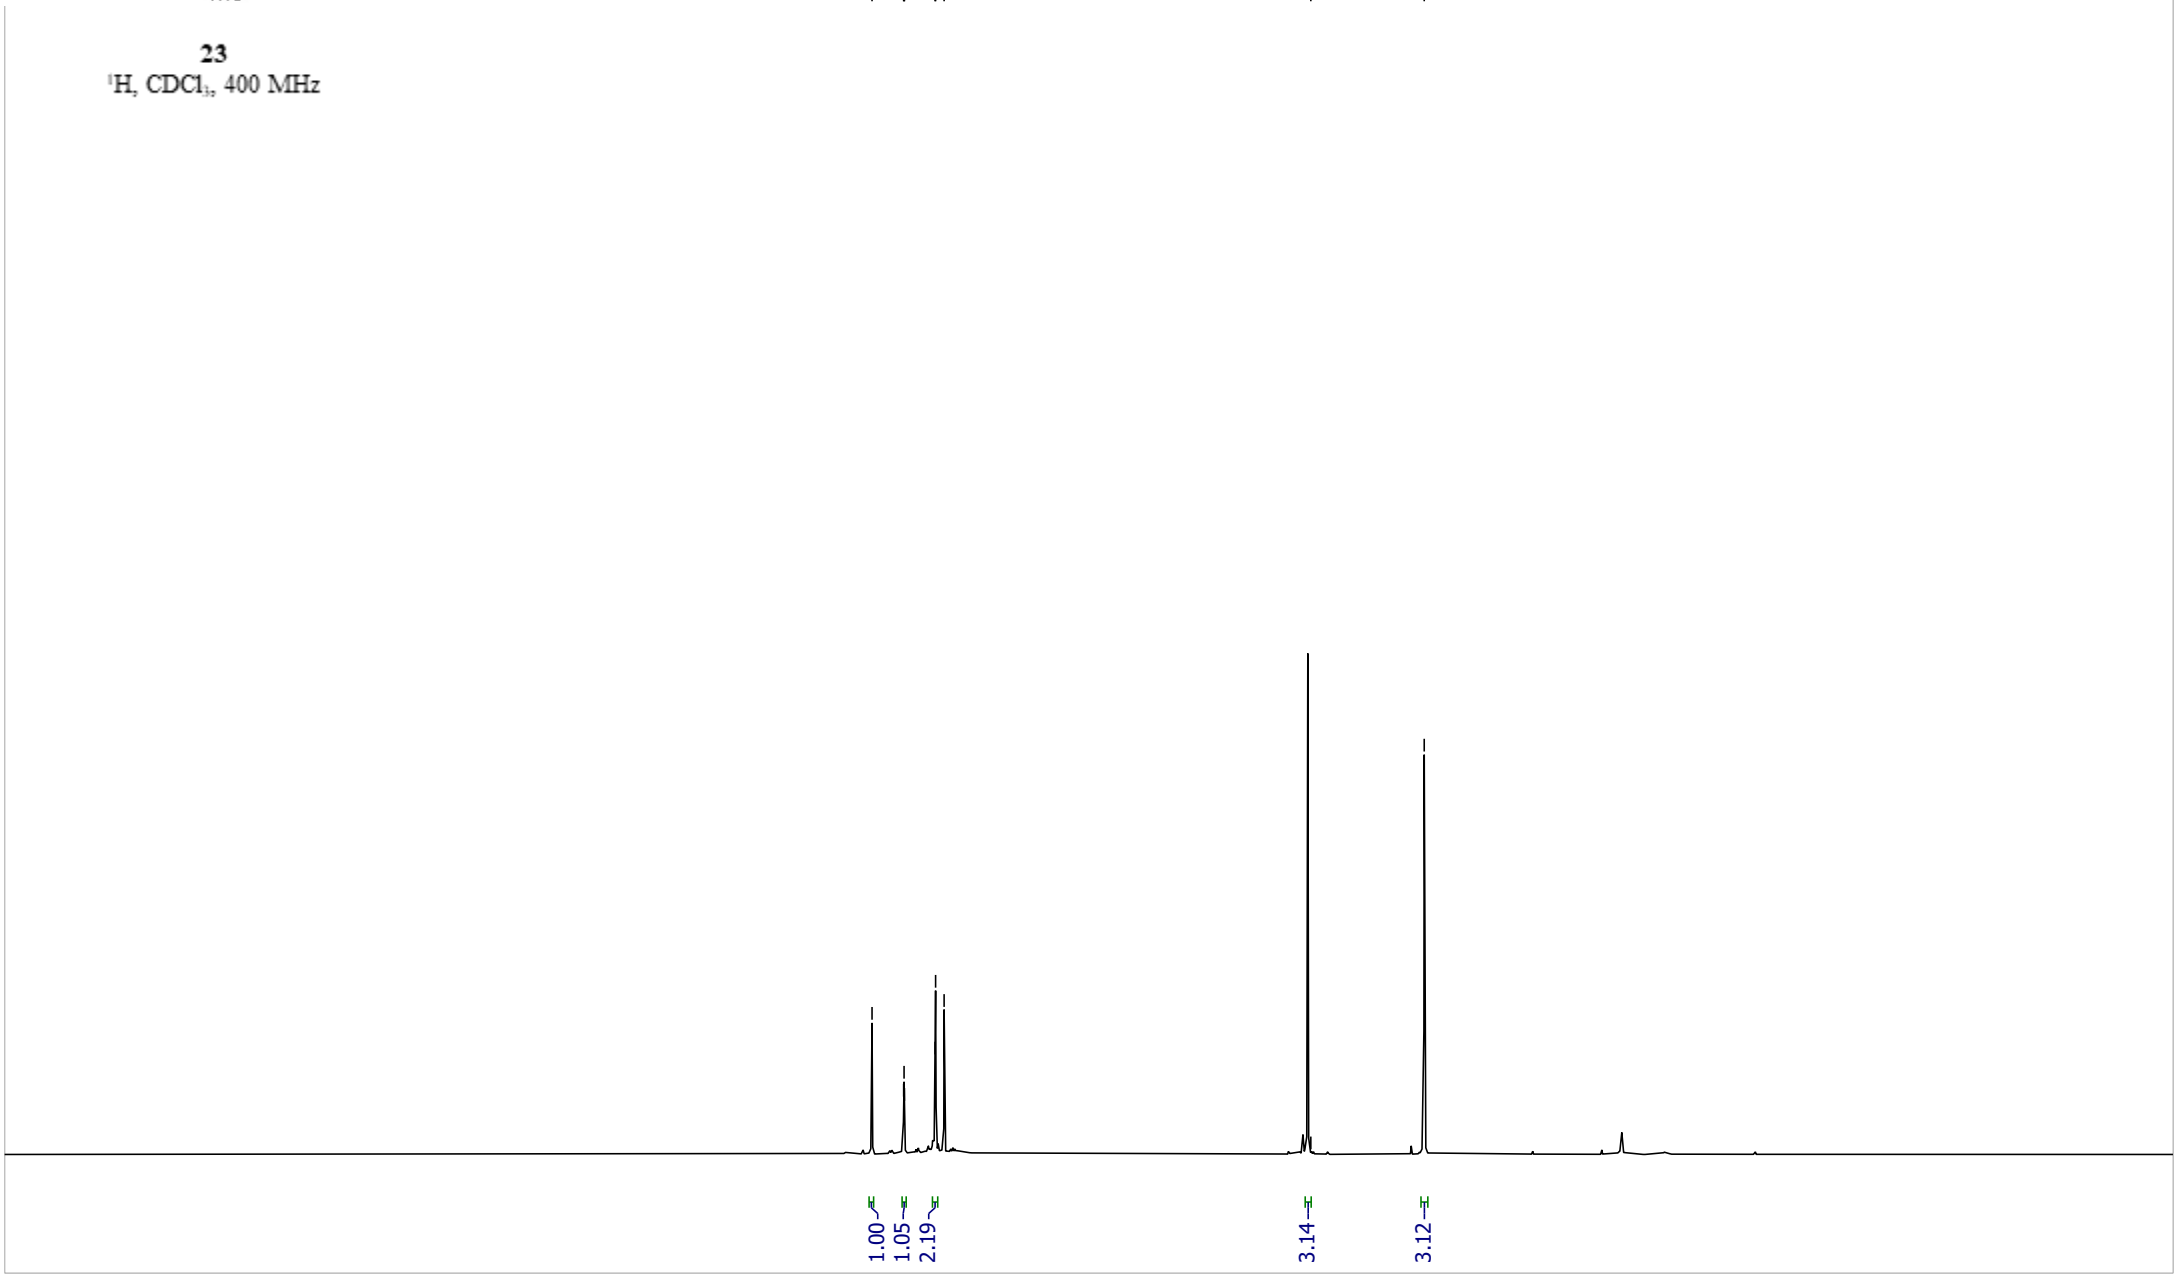



23

$^{13}\text{C}$ ,  $\text{CDCl}_3$ , 101 MHz

138.043  
134.678  
132.740

124.229  
119.834

110.583  
110.292

77.478 CDCl3  
77.160 CDCl3  
76.843 CDCl3

36.451  
35.871

210 200 190 180 170 160 150 140 130 120 110 100 90 80 70 60 50 40 30 20 10 0 -10  
f1 (ppm)

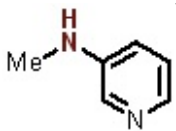

24

<sup>1</sup>H, CDCl<sub>3</sub>, 400 MHz

8.022  
8.015  
7.957  
7.953  
7.945  
7.942  
7.260 CDCl<sub>3</sub>  
7.097  
7.086  
7.077  
7.065  
6.869  
6.865  
6.861  
6.858  
6.848  
6.844  
6.840  
6.837

3.818

2.842

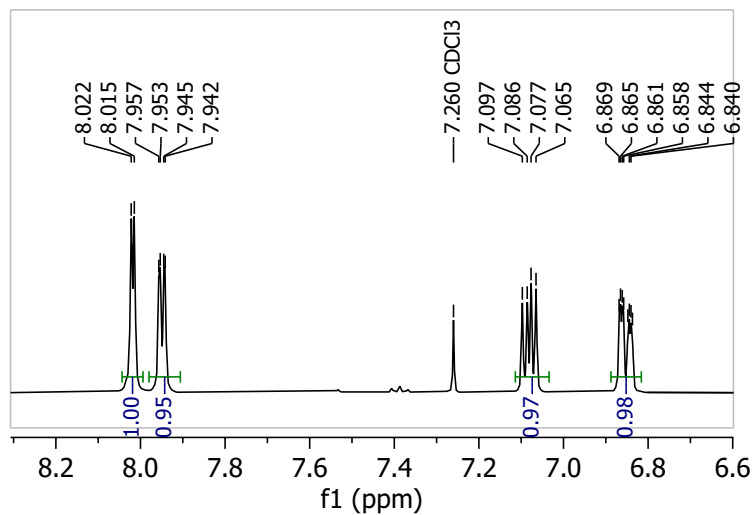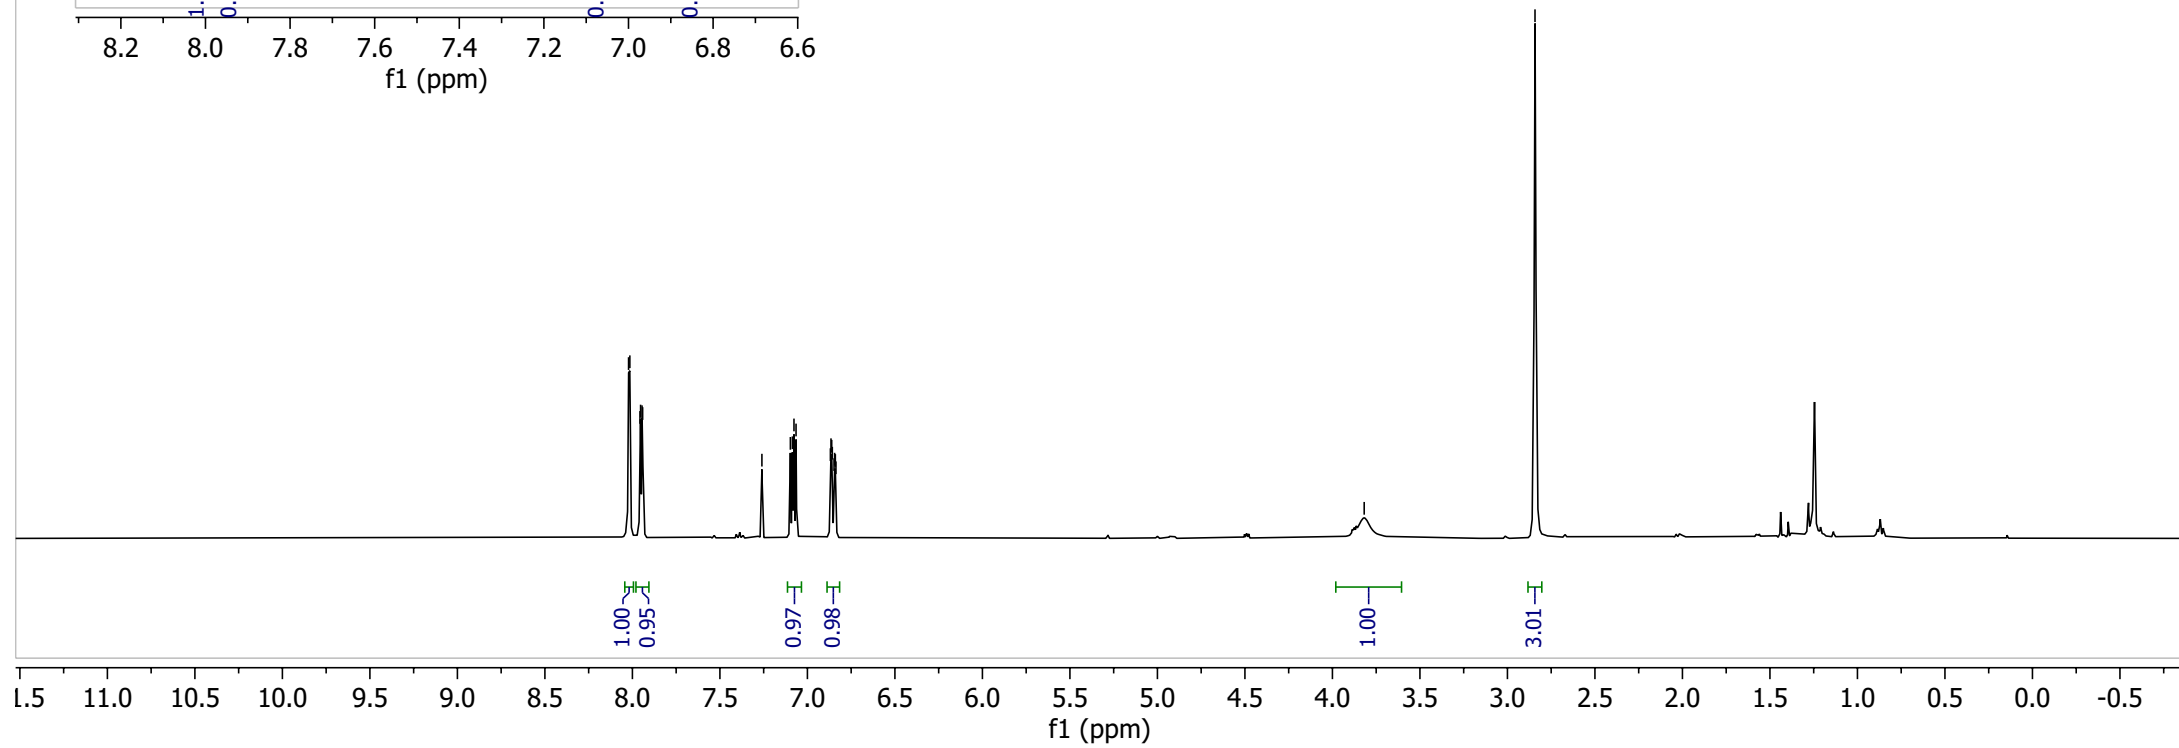

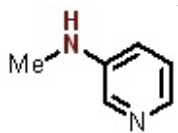

24

$^{13}\text{C}$ ,  $\text{CDCl}_3$ , 101 MHz

— 145.264

— 138.710

— 135.887

— 123.793

— 118.104

77.478,  $\text{CDCl}_3$   
77.160,  $\text{CDCl}_3$   
76.842,  $\text{CDCl}_3$

— 30.395

210 200 190 180 170 160 150 140 130 120 110 100 90 80 70 60 50 40 30 20 10 0 -10  
f1 (ppm)

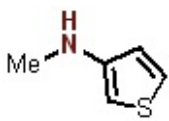

25

<sup>1</sup>H, CDCl<sub>3</sub>, 400 MHz

7.260 CDCl<sub>3</sub>  
7.172  
7.164  
7.159  
7.152  
6.632  
6.628  
6.619  
6.615  
5.966  
5.962  
5.958  
5.954

2.835

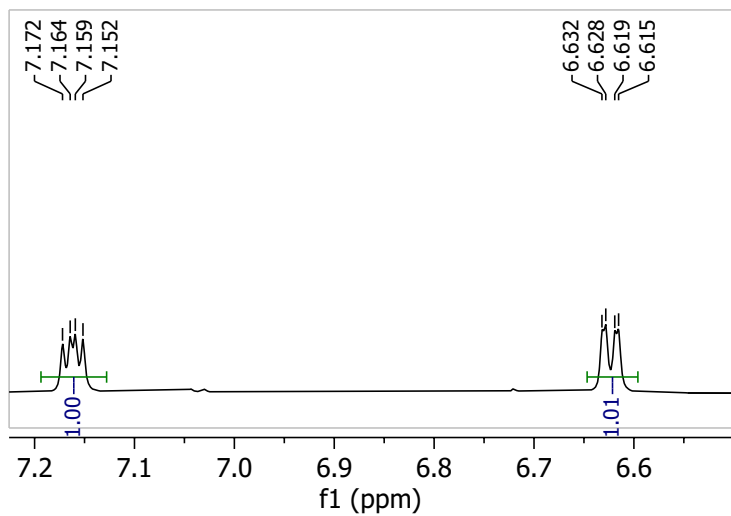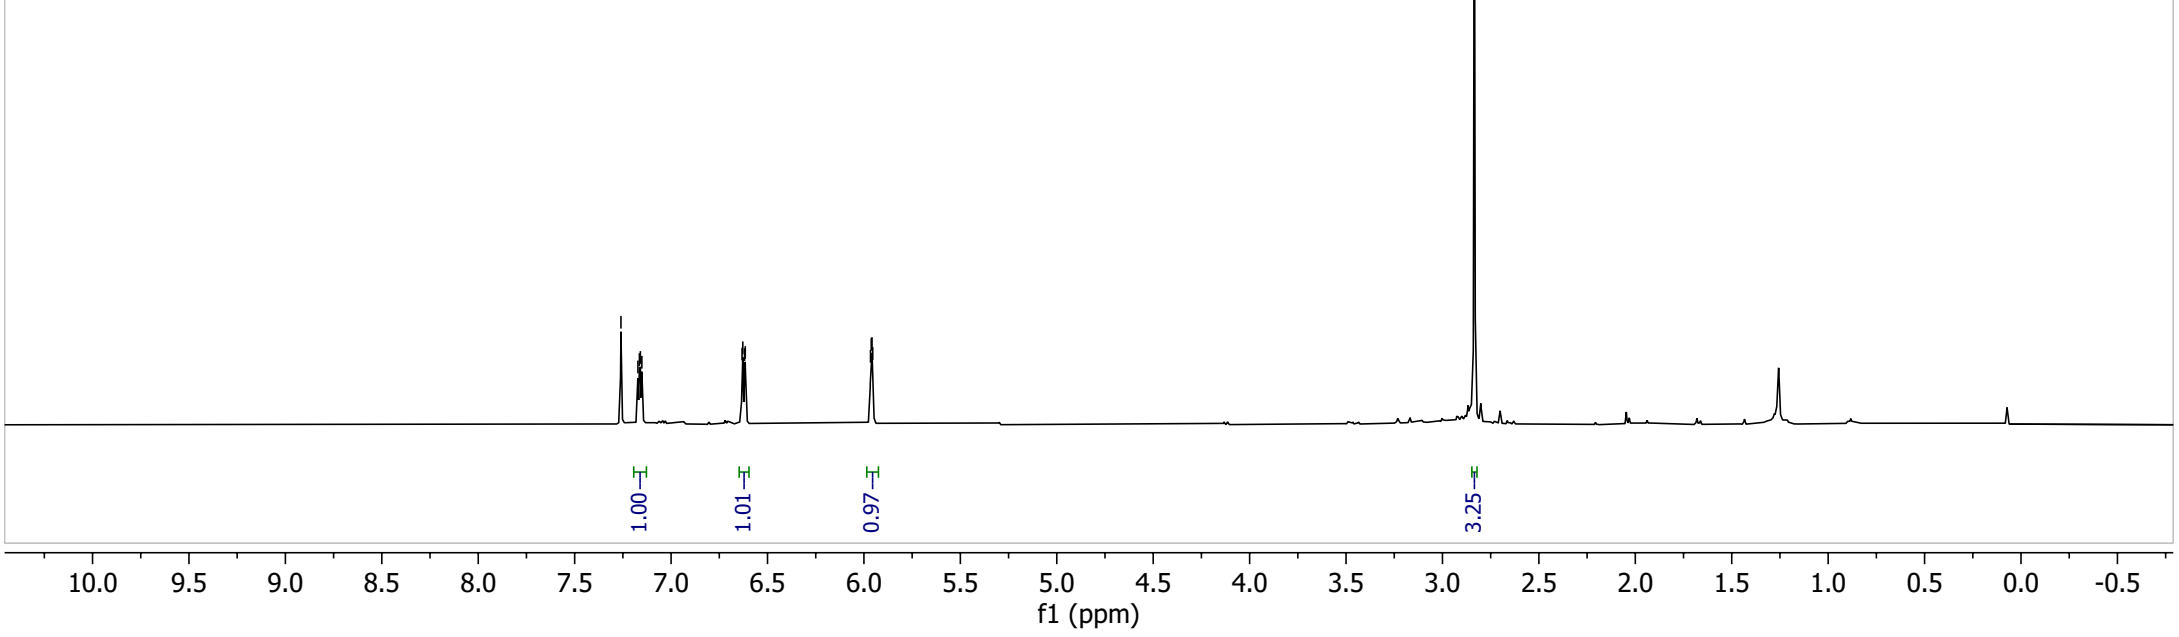



25  
 $^{13}\text{C}$ ,  $\text{CDCl}_3$ , 101 MHz

— 150.109

— 125.389

— 119.924

— 95.307

77.477  $\text{CDCl}_3$   
77.160  $\text{CDCl}_3$   
76.842  $\text{CDCl}_3$

— 33.006

210 200 190 180 170 160 150 140 130 120 110 100 90 80 70 60 50 40 30 20 10 0 -10  
f1 (ppm)

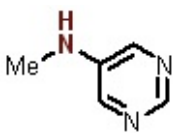

26  
<sup>1</sup>H, CDCl<sub>3</sub>, 400 MHz

— 8.607

∨ 8.116  
8.113

— 7.260 CDCl<sub>3</sub>

— 3.777

∨ 2.908  
2.897

1.00

2.05

1.07

3.04

12.5 12.0 11.5 11.0 10.5 10.0 9.5 9.0 8.5 8.0 7.5 7.0 6.5 6.0 5.5 5.0 4.5 4.0 3.5 3.0 2.5 2.0 1.5 1.0 0.5 0.0 -0.5 -1.0  
f1 (ppm)

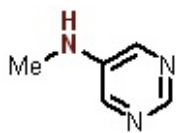

— 148.687

— 142.694

— 140.642

77.478

77.160 CDCl<sub>3</sub>

76.843

— 30.050

26

<sup>13</sup>C, CDCl<sub>3</sub>, 101 MHz

210 200 190 180 170 160 150 140 130 120 110 100 90 80 70 60 50 40 30 20 10 0 -10  
f1 (ppm)



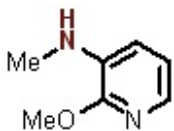

27

$^1\text{H}$ ,  $\text{CDCl}_3$ , 400 MHz

7.484  
7.480  
7.471  
7.467  
7.260  $\text{CDCl}_3$   
6.801  
6.789  
6.782  
6.770  
6.691  
6.688  
6.673  
6.669

4.191  
3.992

2.834

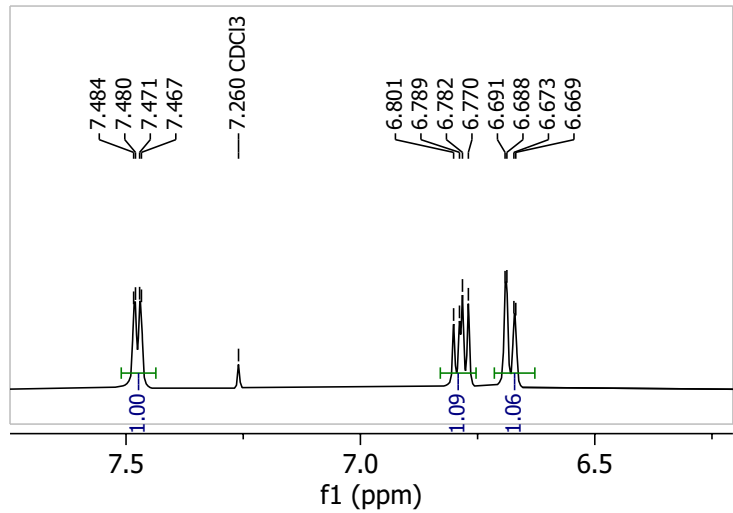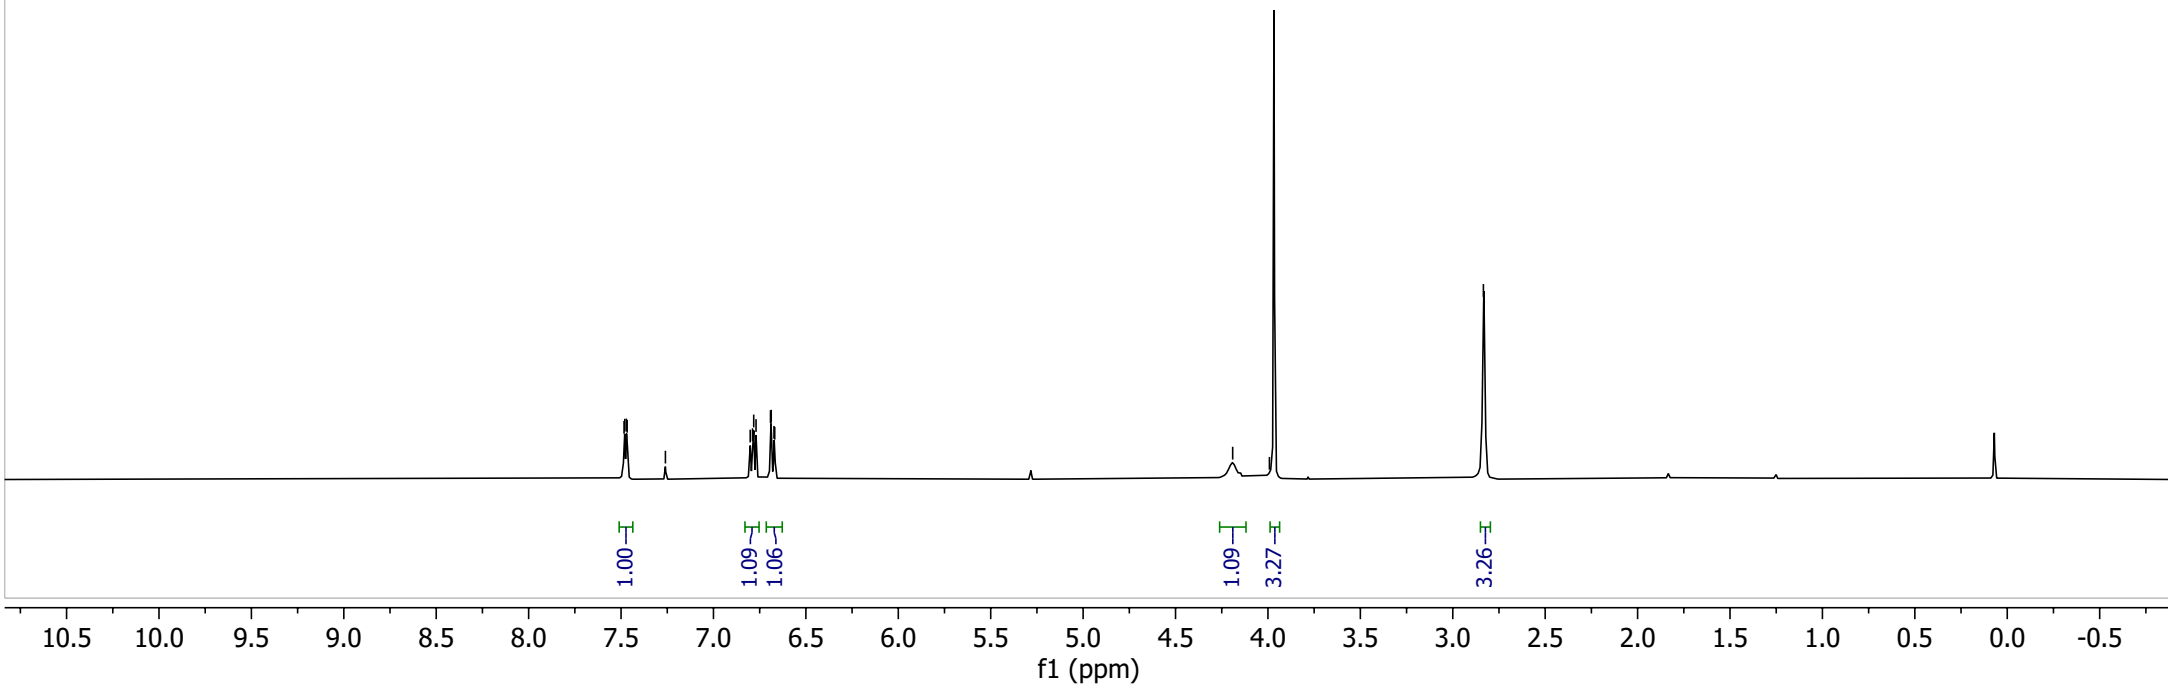

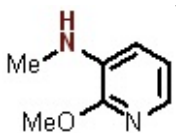

**27**  
<sup>13</sup>C, CDCl<sub>3</sub>, 101 MHz

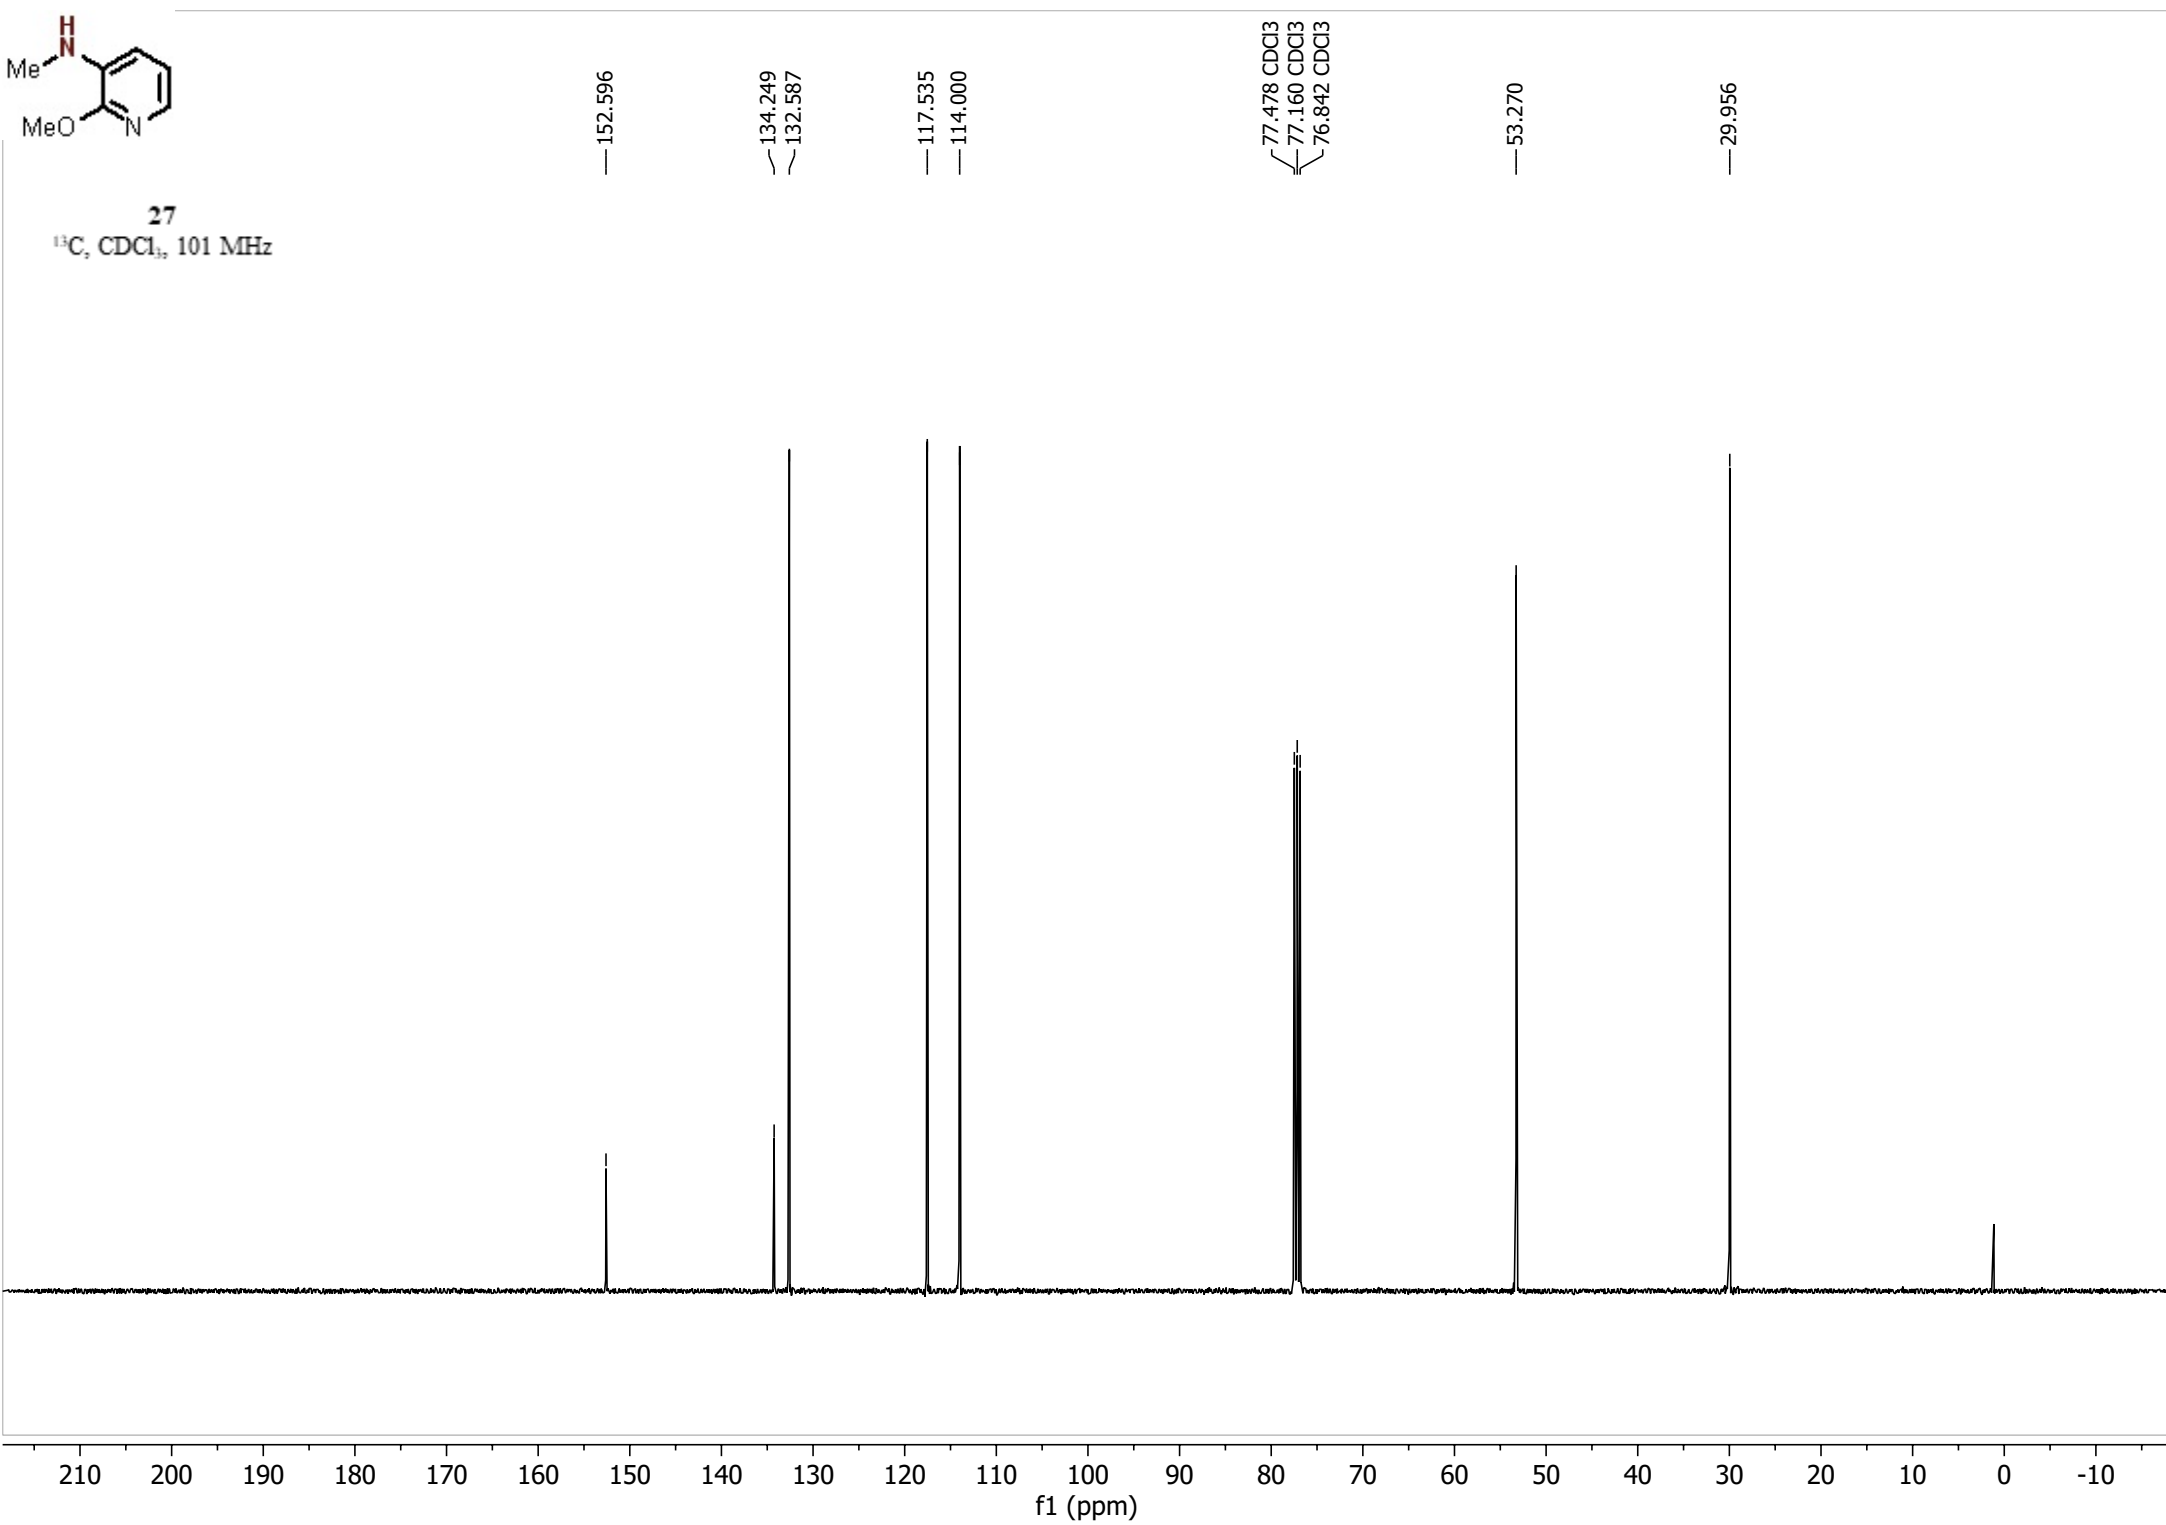

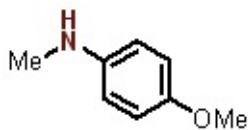

**28**  
<sup>1</sup>H, CDCl<sub>3</sub>, 400 MHz

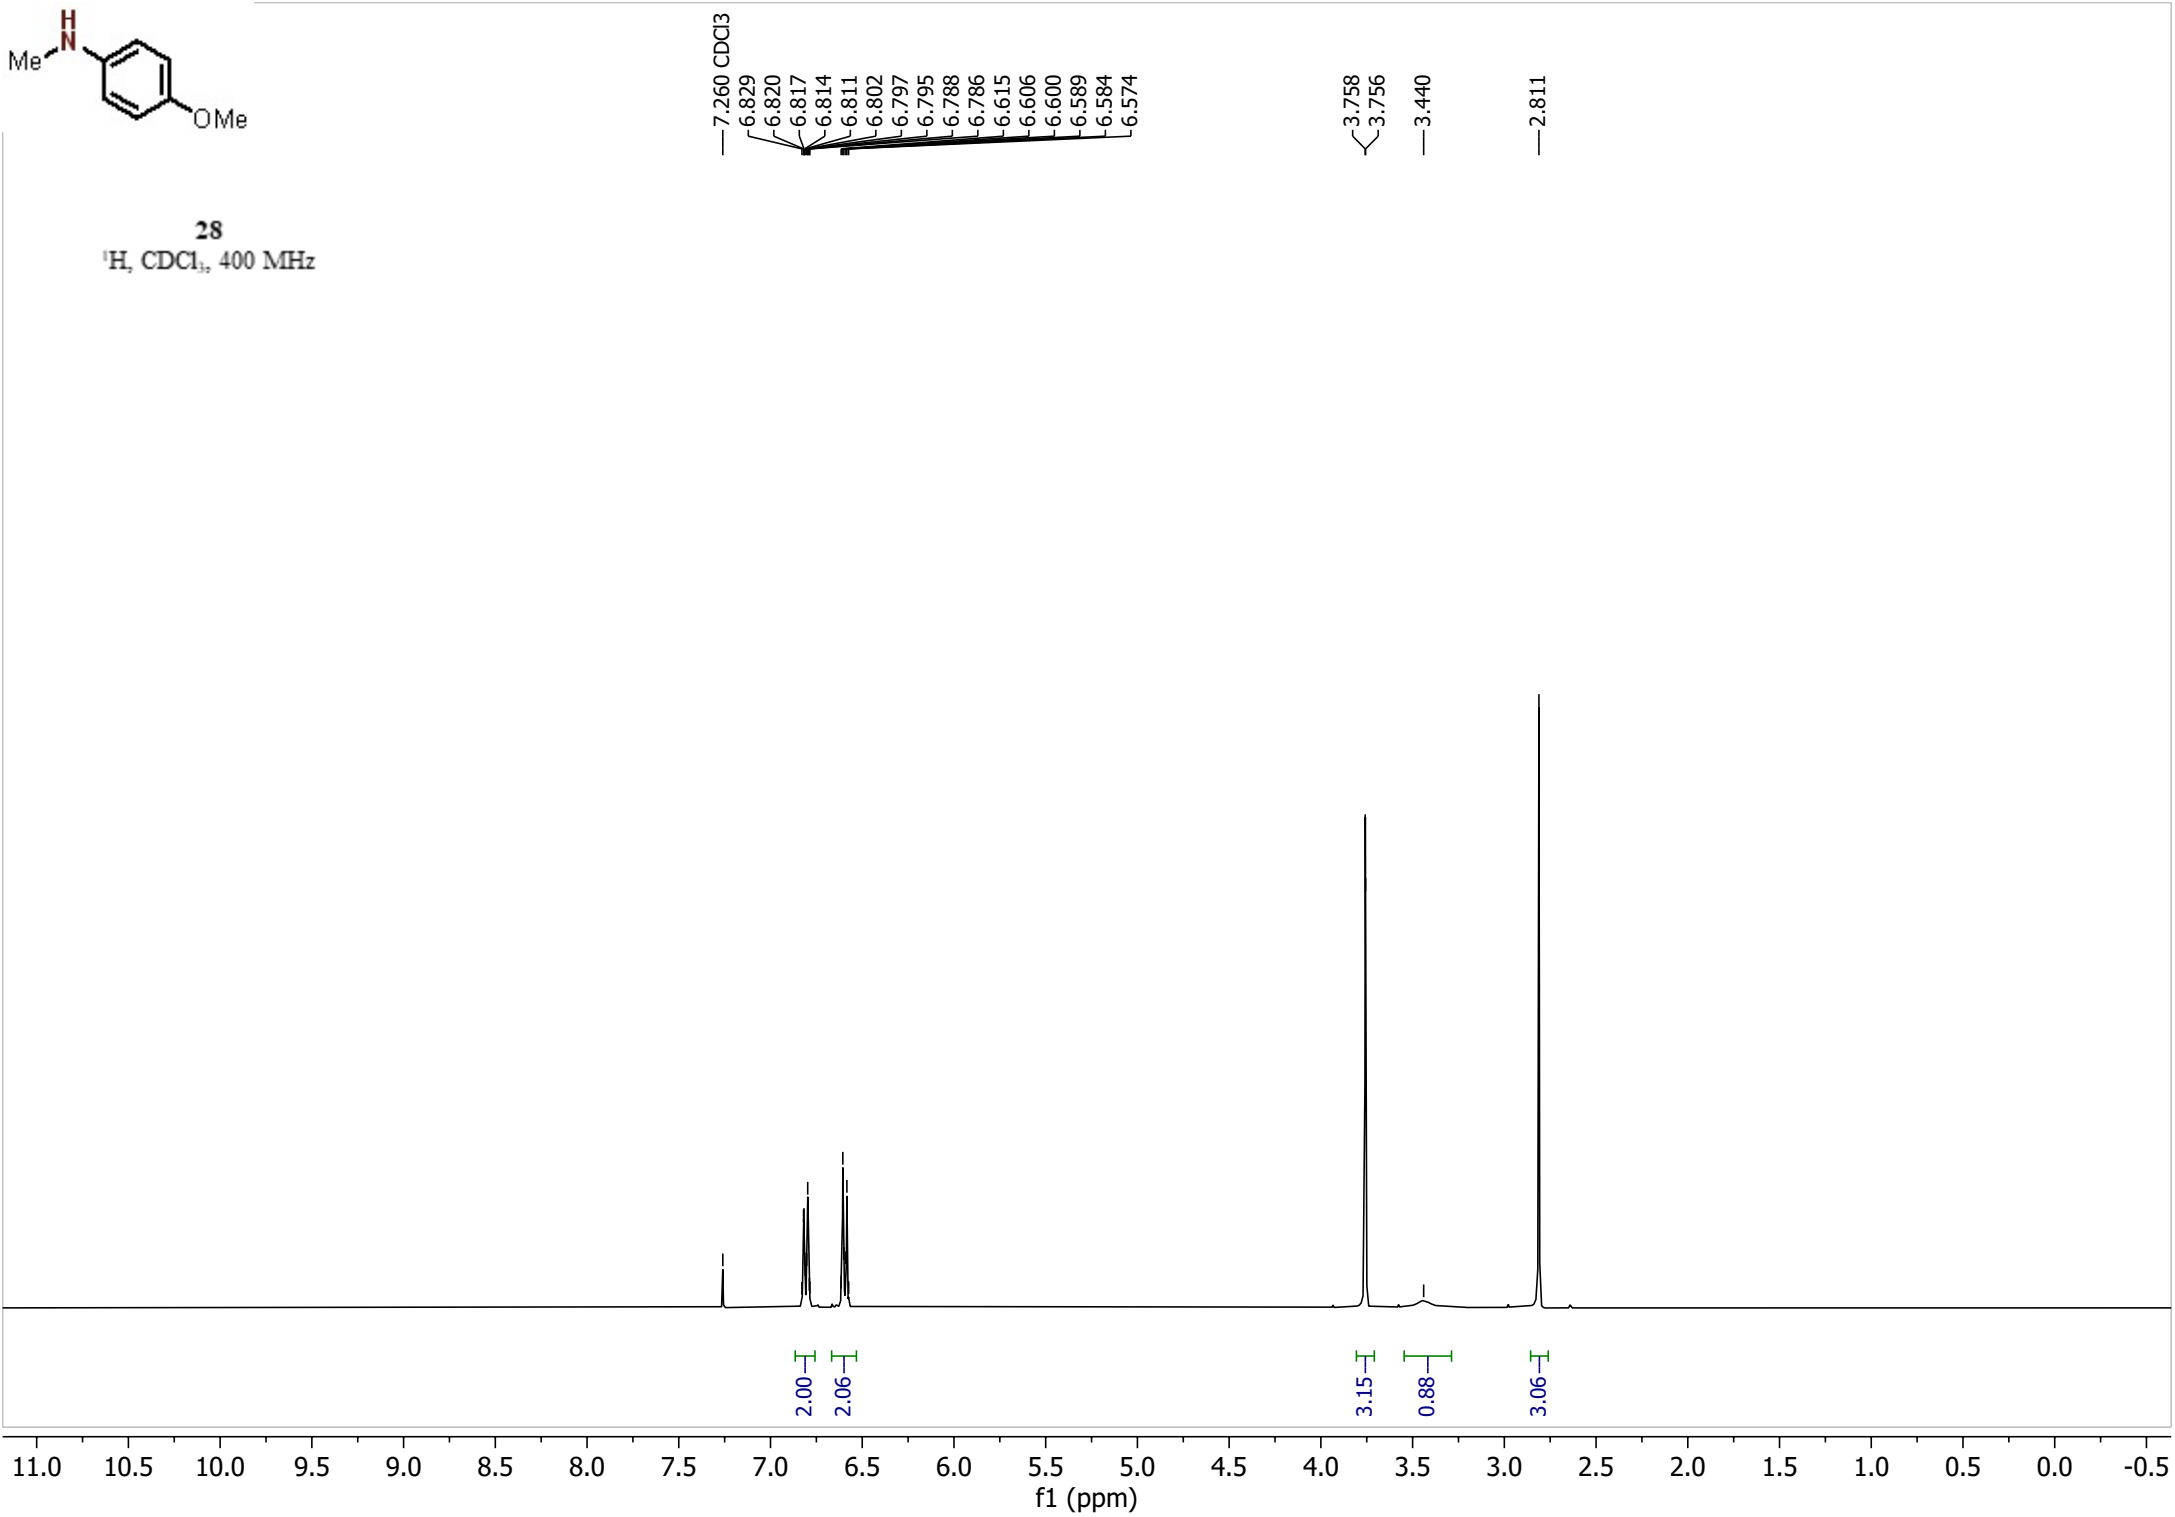



**28**  
<sup>13</sup>C, CDCl<sub>3</sub>, 101 MHz

— 152.204

— 143.836

— 115.034

— 113.760

77.479 CDCl<sub>3</sub>

77.160 CDCl<sub>3</sub>

76.843 CDCl<sub>3</sub>

— 55.989

— 31.747

210 200 190 180 170 160 150 140 130 120 110 100 90 80 70 60 50 40 30 20 10 0 -10  
f1 (ppm)

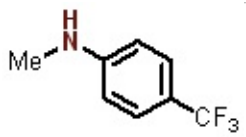

29  
<sup>1</sup>H, CDCl<sub>3</sub>, 400 MHz

7.431  
7.404  
7.260 CDCl<sub>3</sub>

6.615  
6.593

4.100

2.871

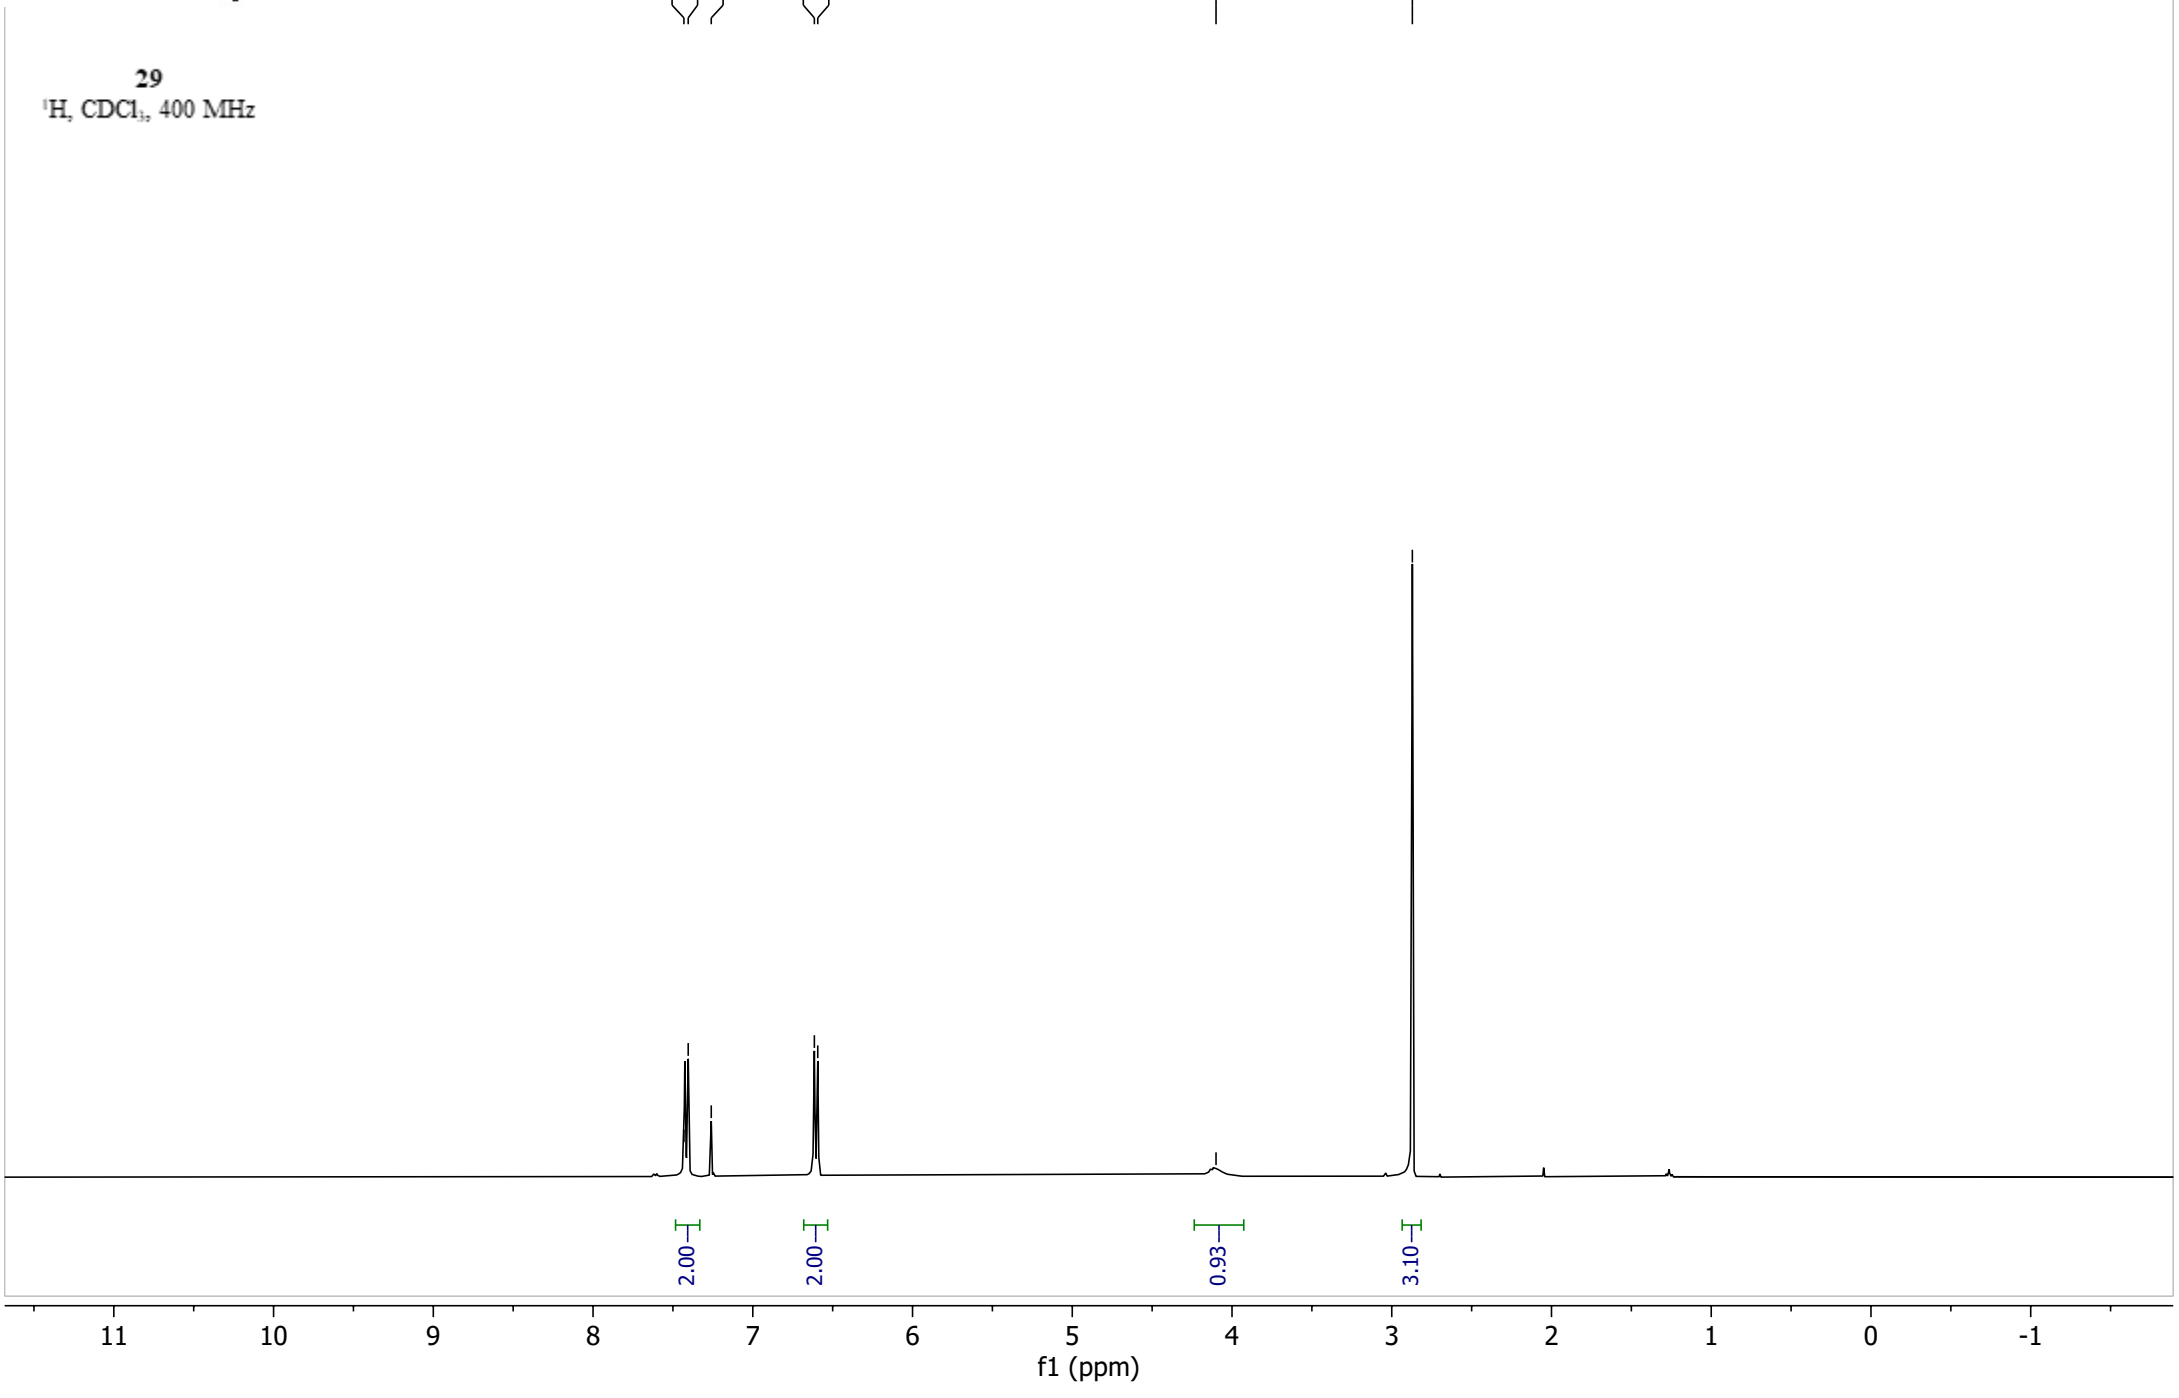

2.00

2.00

0.93

3.10

11 10 9 8 7 6 5 4 3 2 1 0 -1

f1 (ppm)



**29**  
 $^{13}\text{C}$ ,  $\text{CDCl}_3$ , 101 MHz

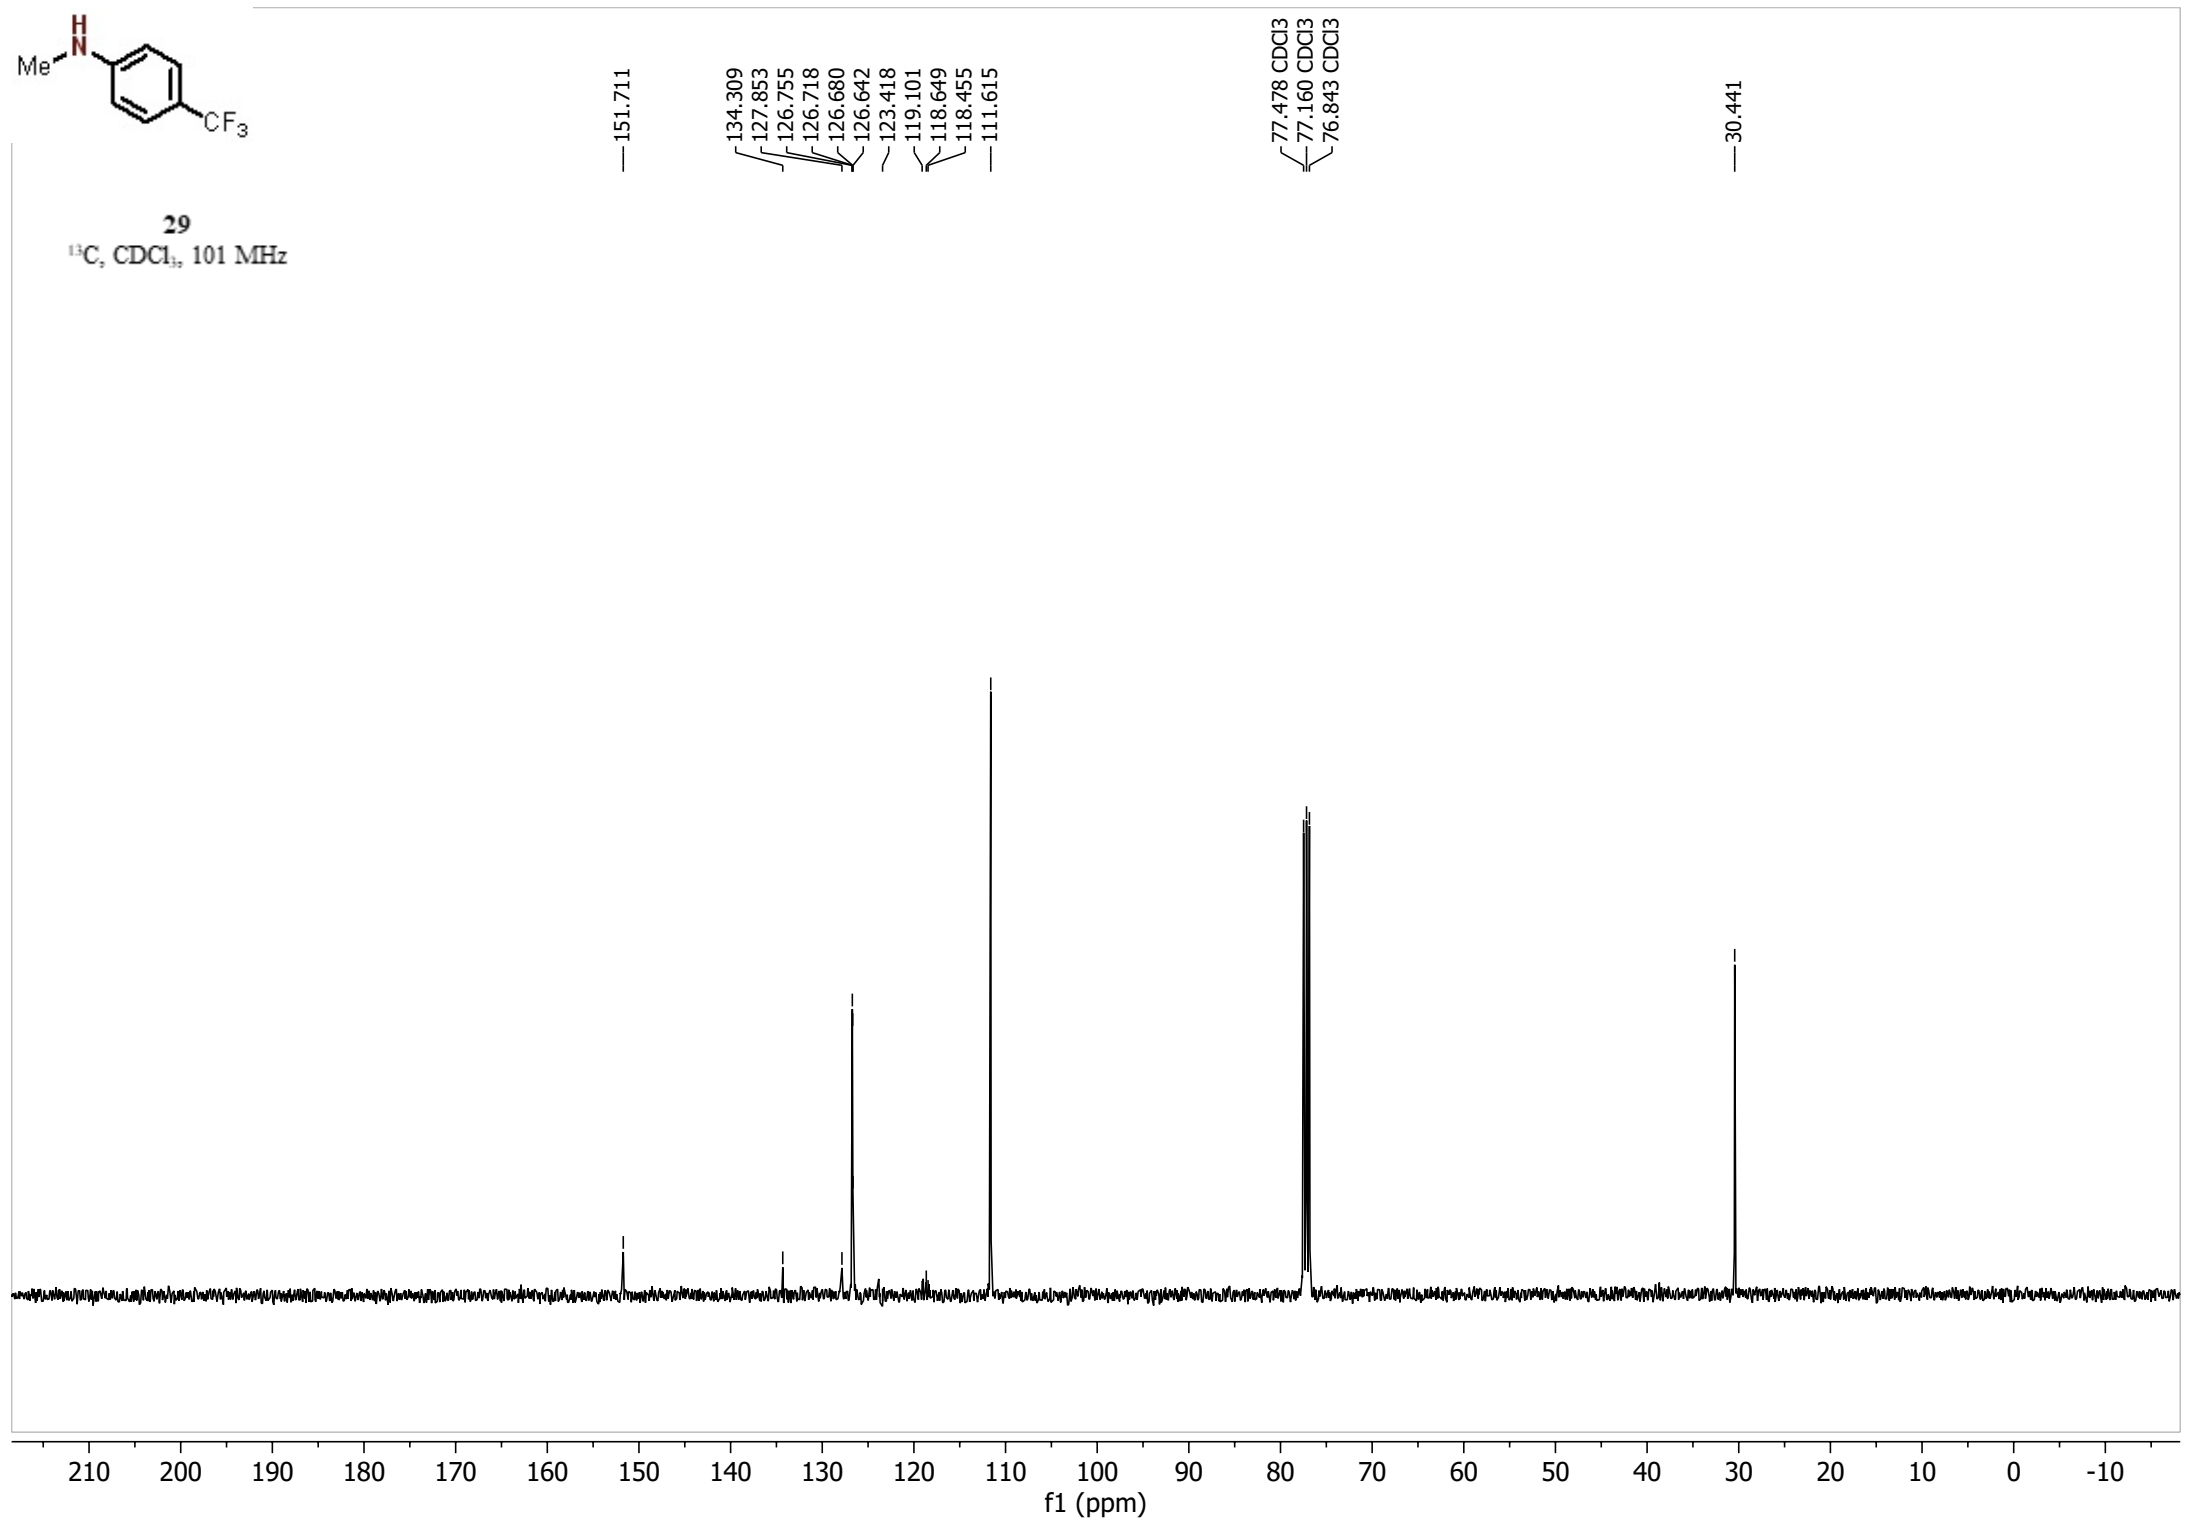

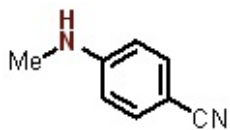

**30**  
<sup>1</sup>H, CDCl<sub>3</sub>, 400 MHz

7.446  
7.436  
7.431  
7.419  
7.414  
7.407  
7.260 CDCl<sub>3</sub>  
6.567  
6.561  
6.556  
6.544  
6.539  
6.532

—4.291

—2.873

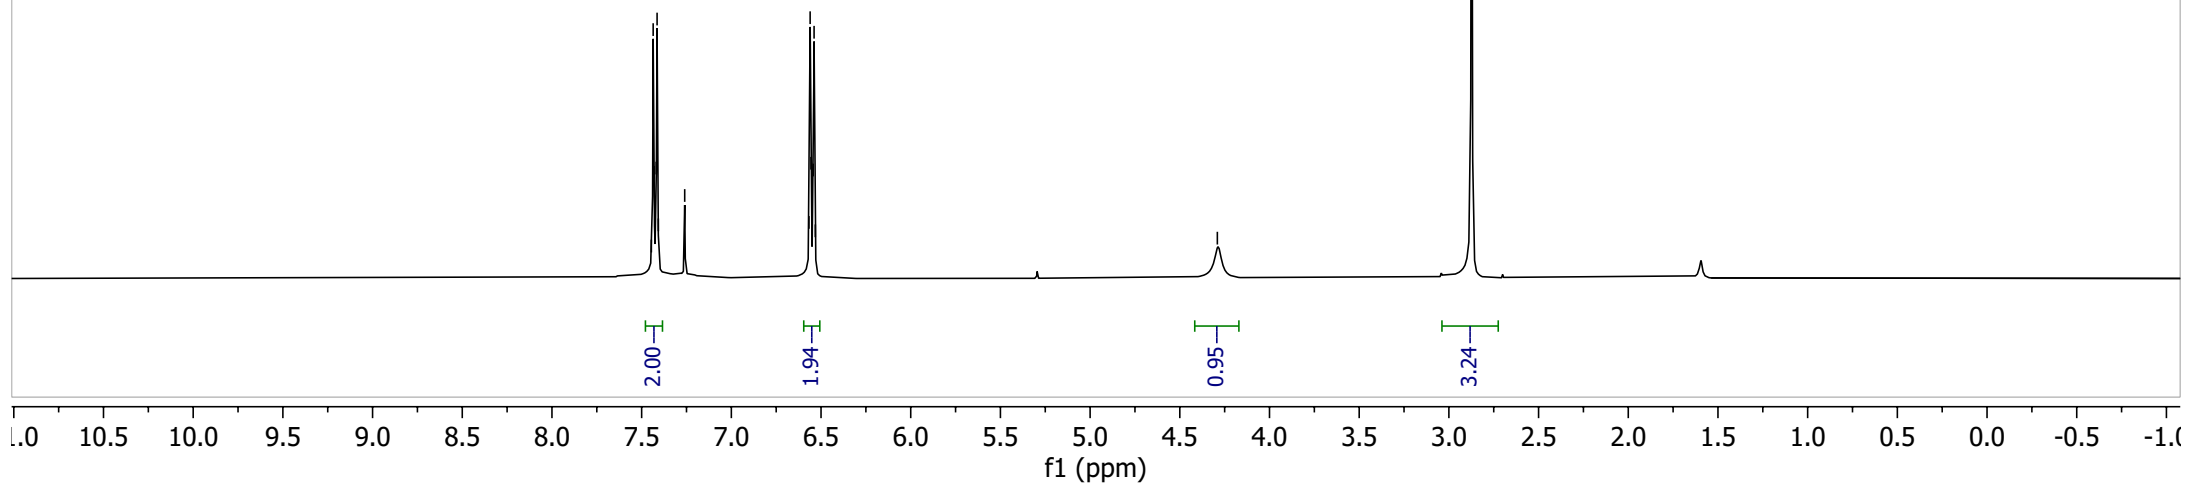



30

$^{13}\text{C}$ ,  $\text{CDCl}_3$ , 101 MHz

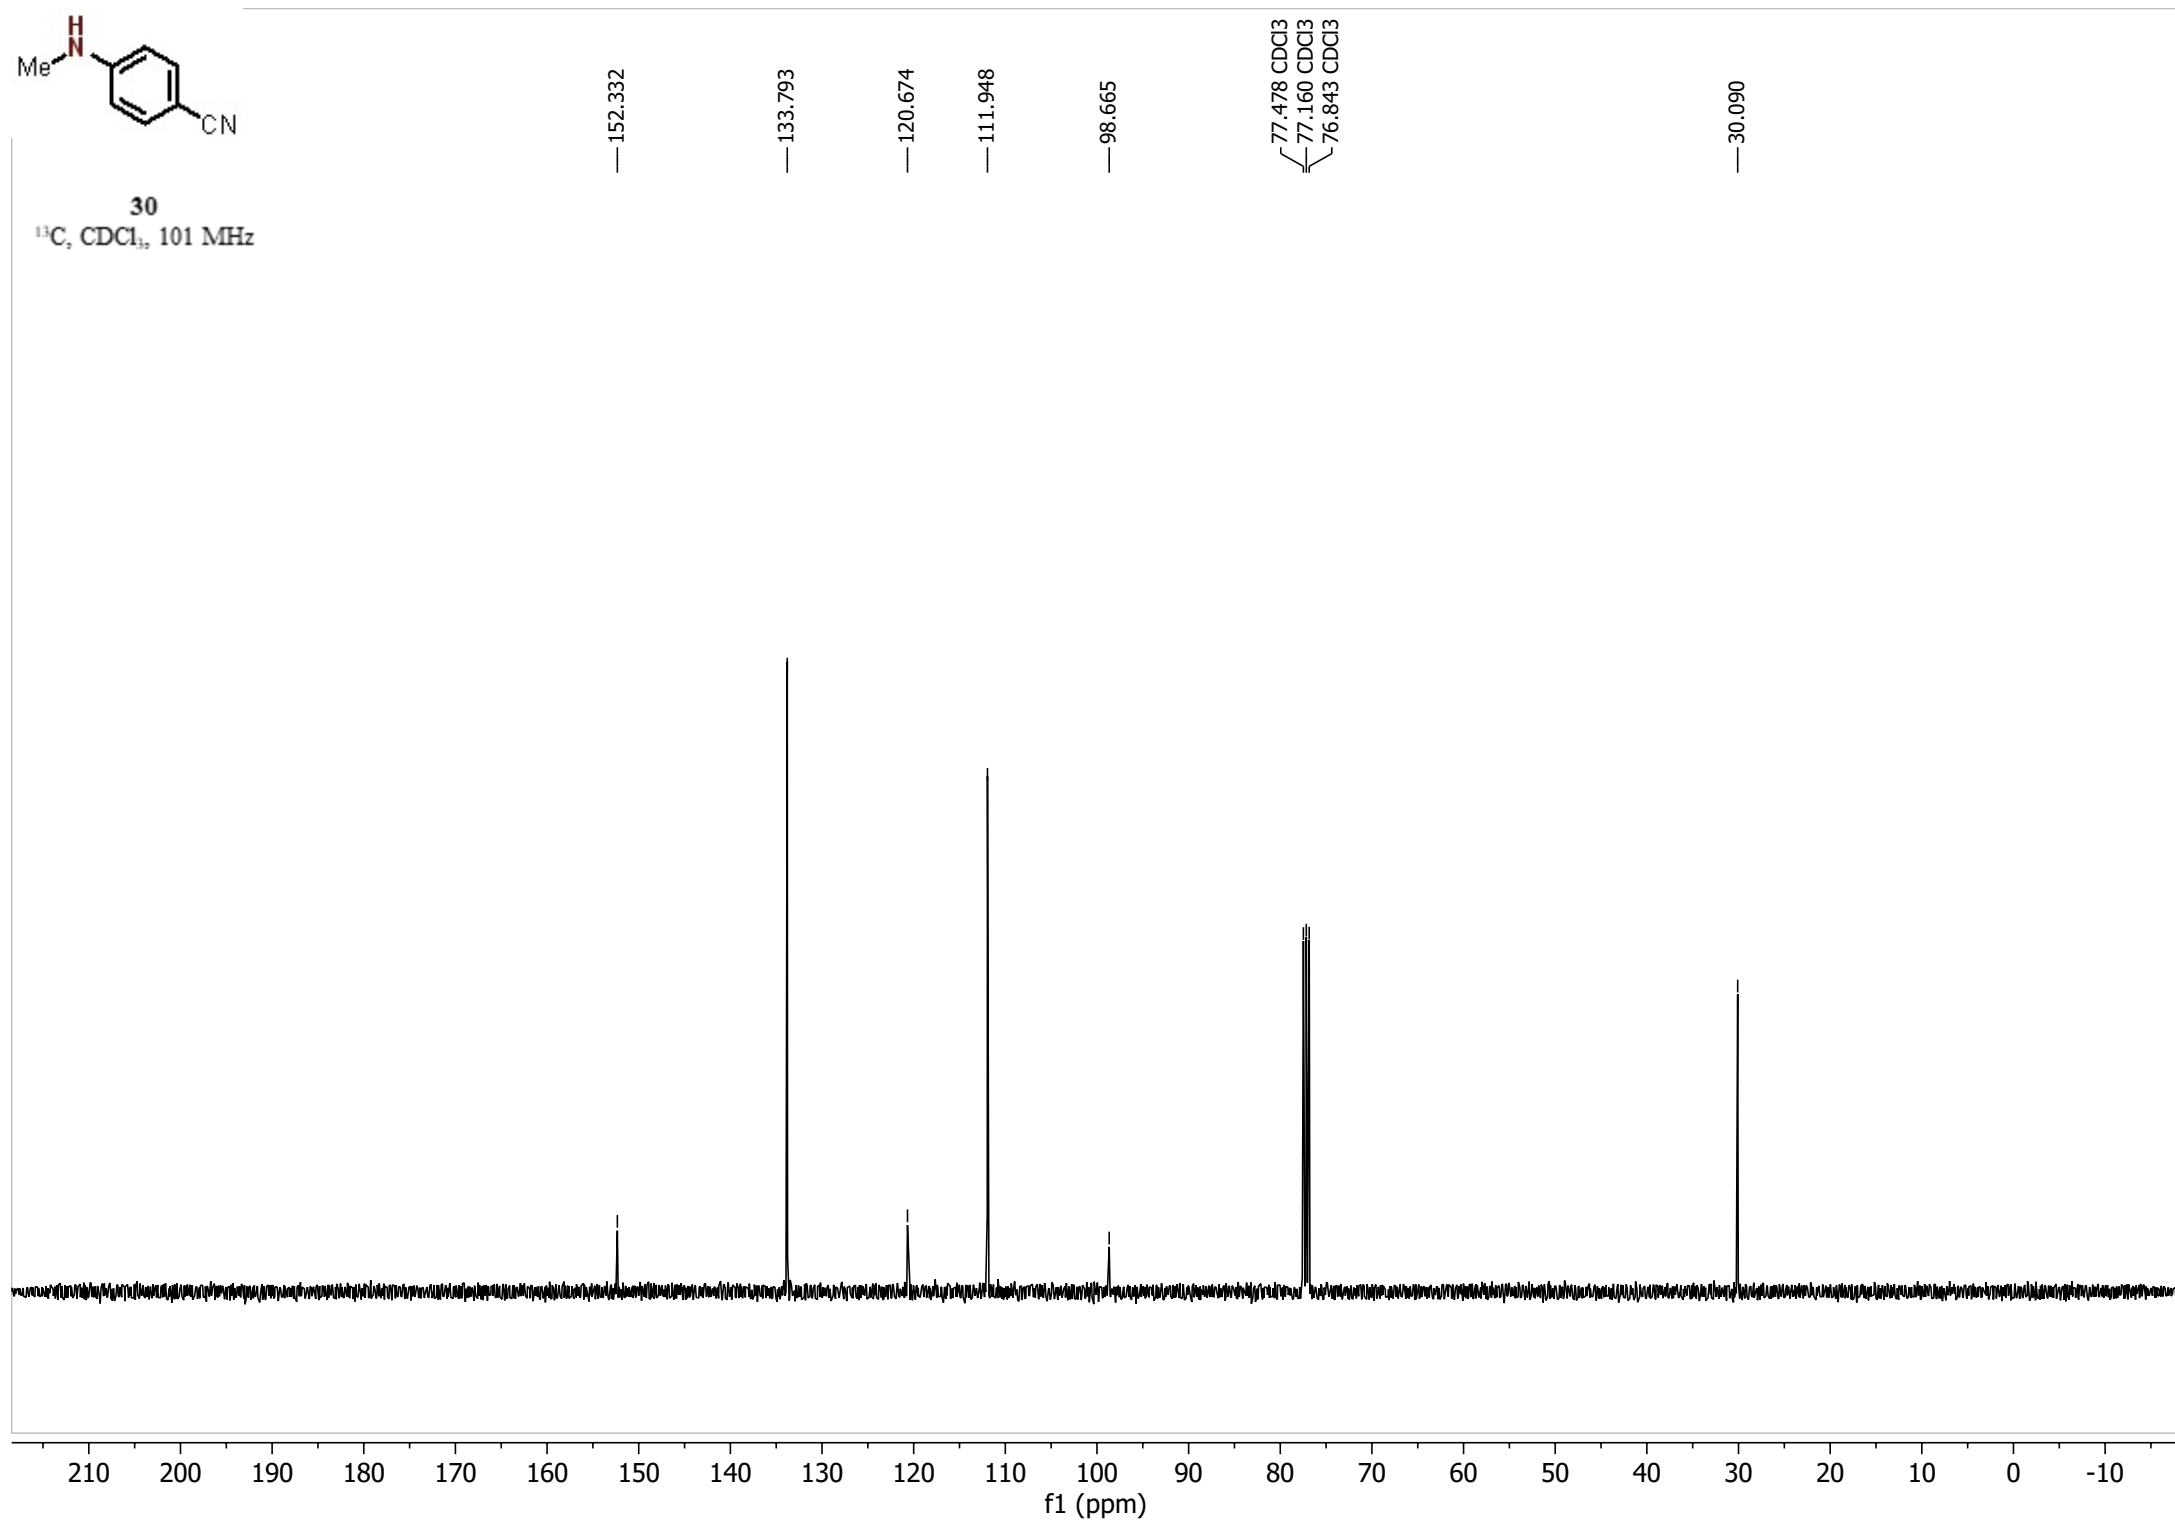



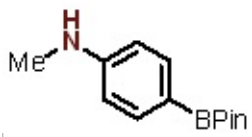

**31**  
<sup>1</sup>H, CDCl<sub>3</sub>, 400 MHz

7.665  
7.660  
7.656  
7.643  
7.639  
— 7.260 CDCl<sub>3</sub>  
6.596  
6.590  
6.586  
6.573  
6.569  
6.563

— 3.919

— 2.855

— 1.324

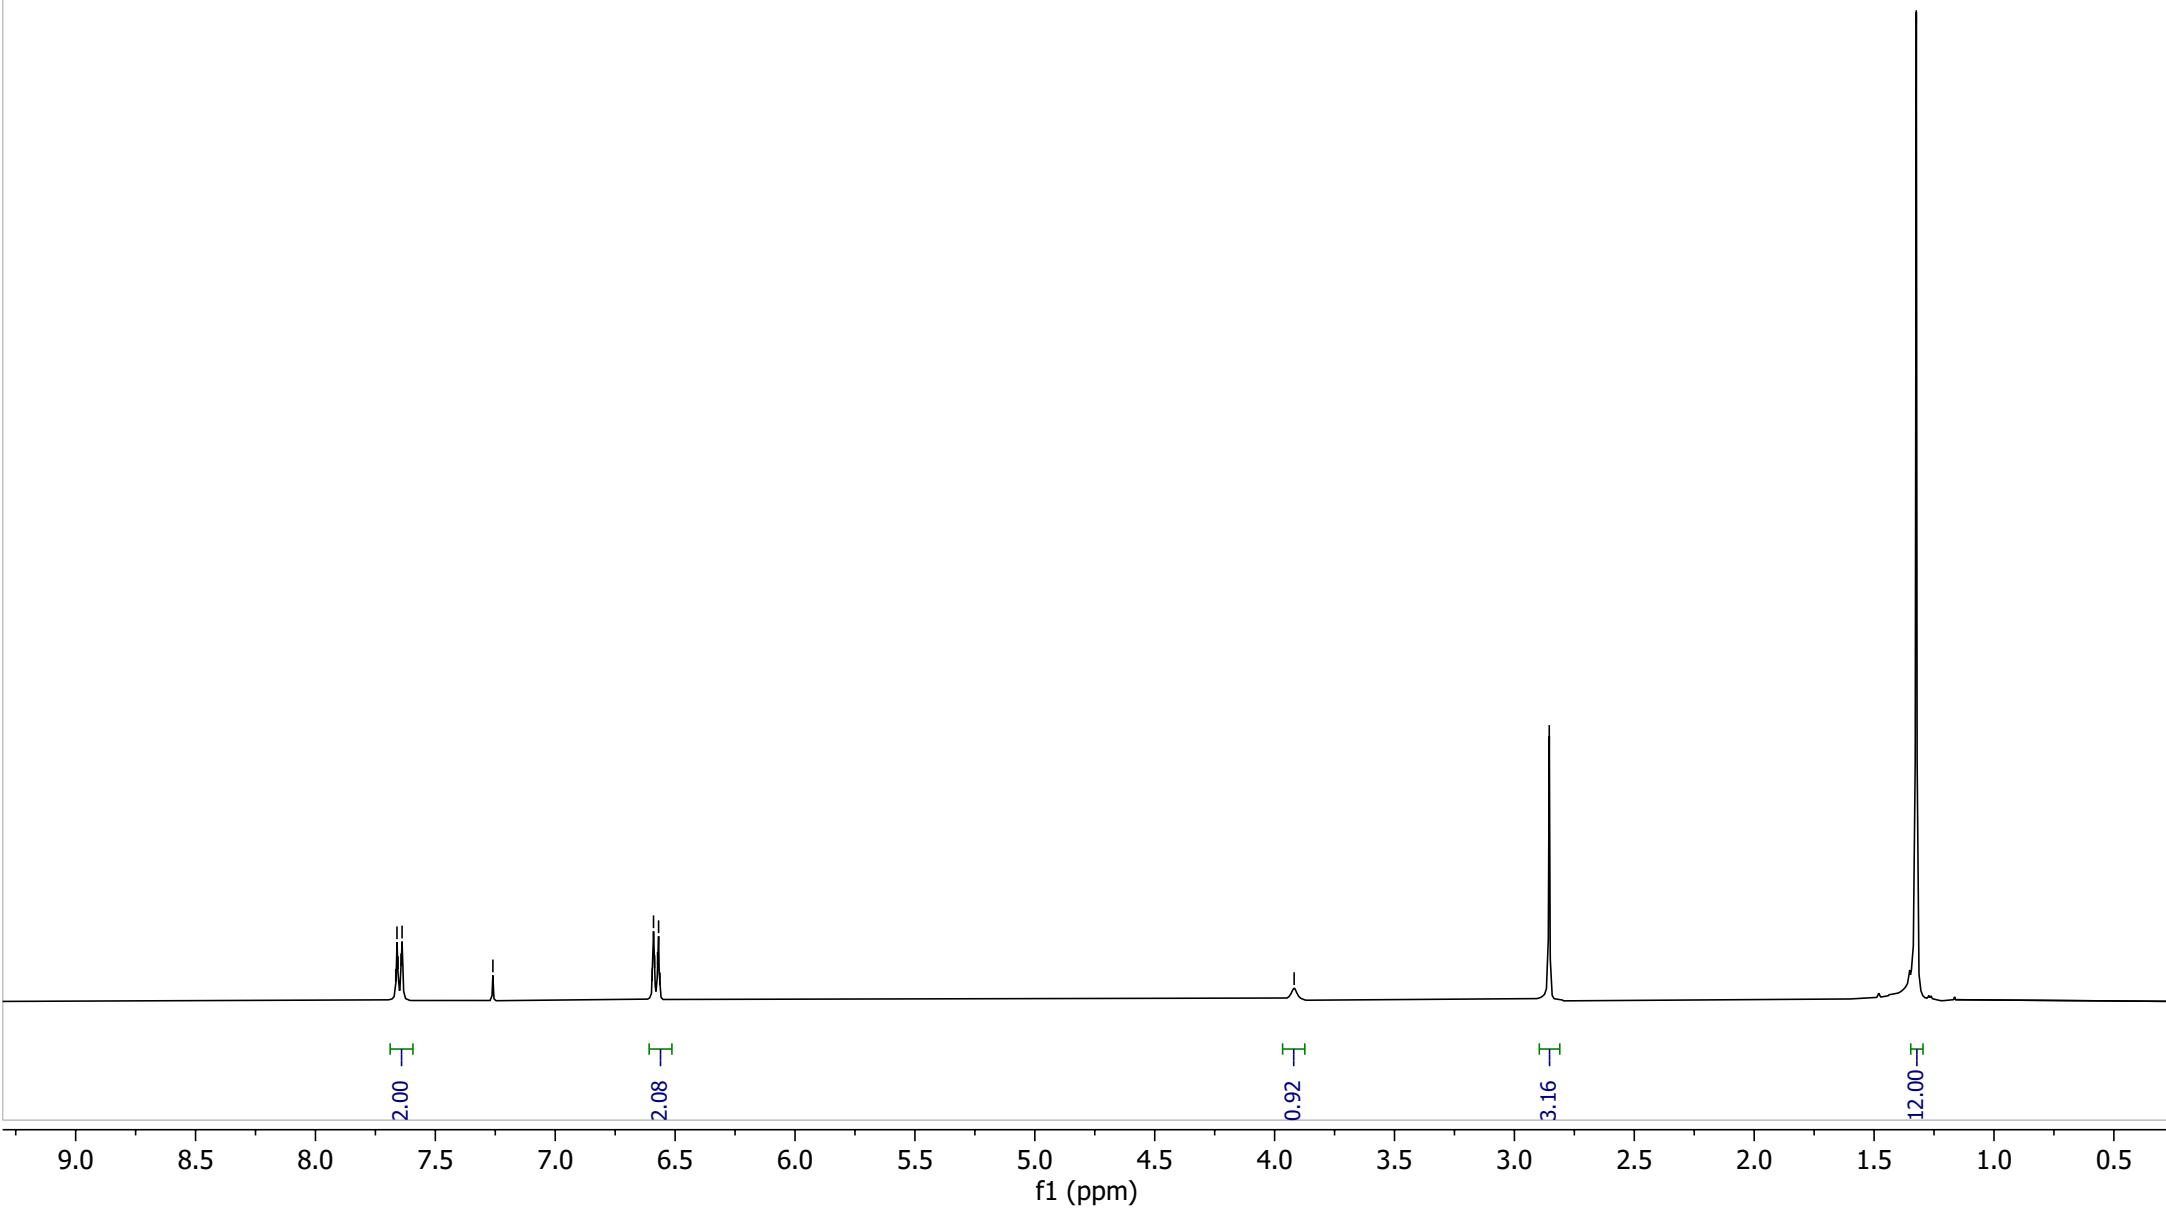

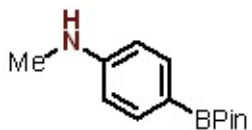

31

$^{13}\text{C}$ ,  $\text{CDCl}_3$ , 101 MHz

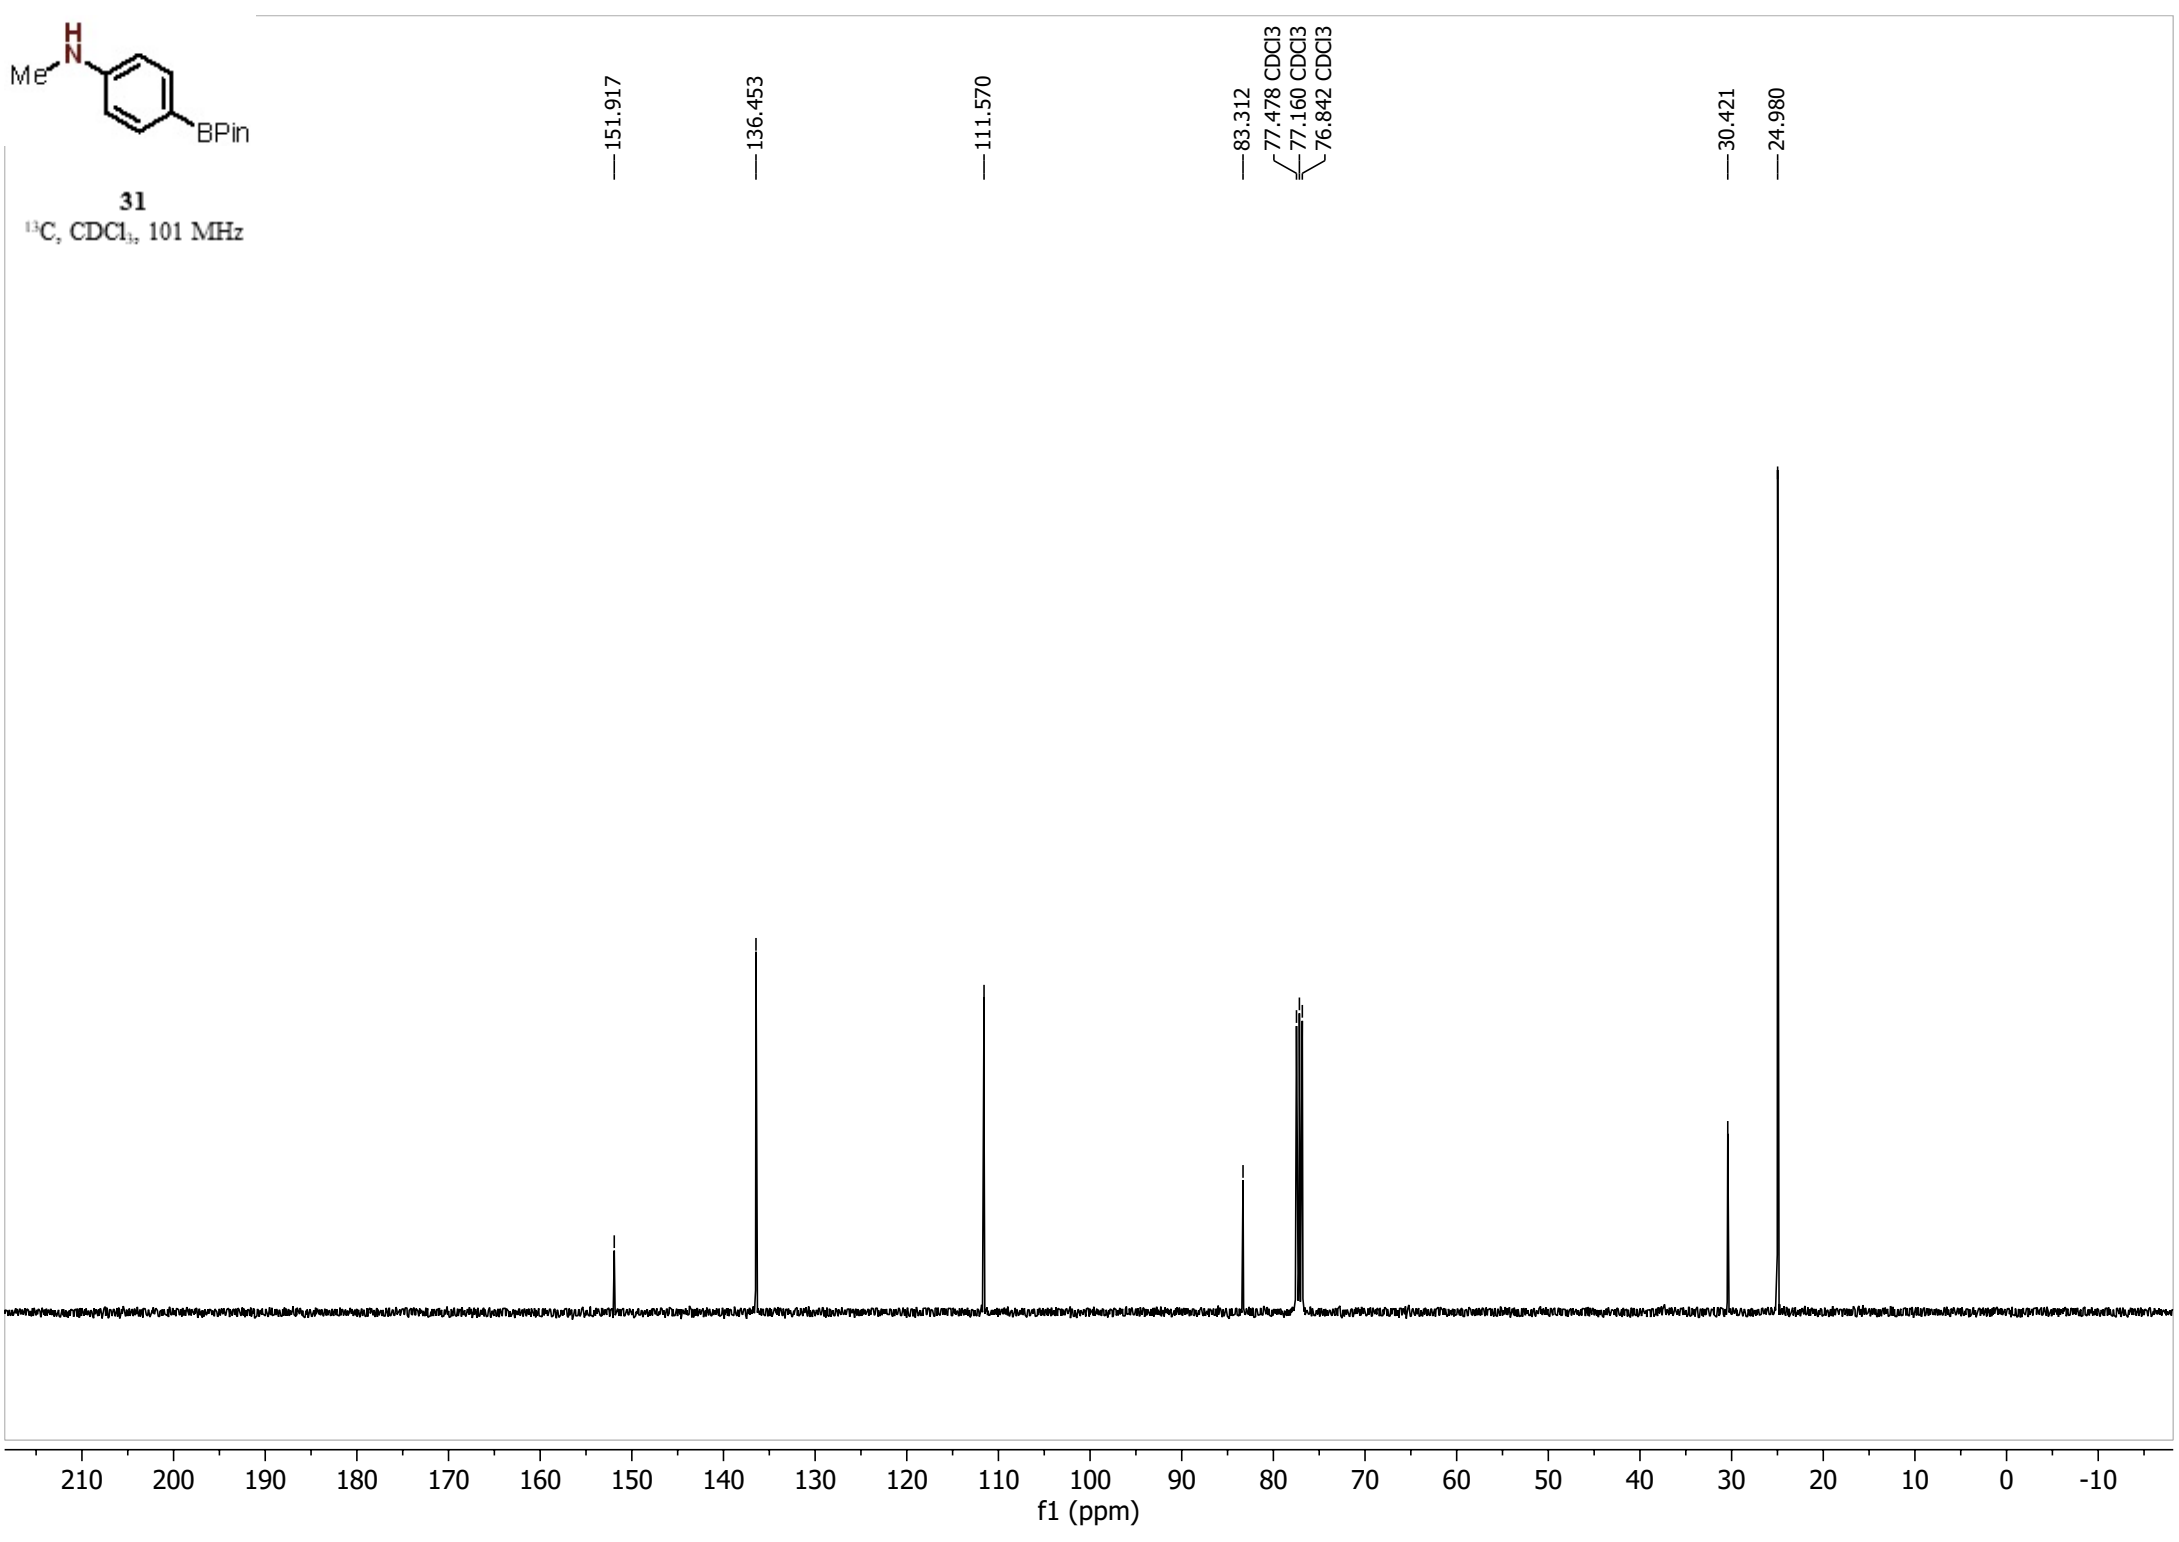

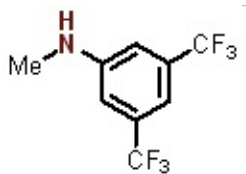

32  
<sup>1</sup>H, CDCl<sub>3</sub>, 400 MHz

7.260 CDCl<sub>3</sub>  
7.146  
6.921

4.162

2.912  
2.899

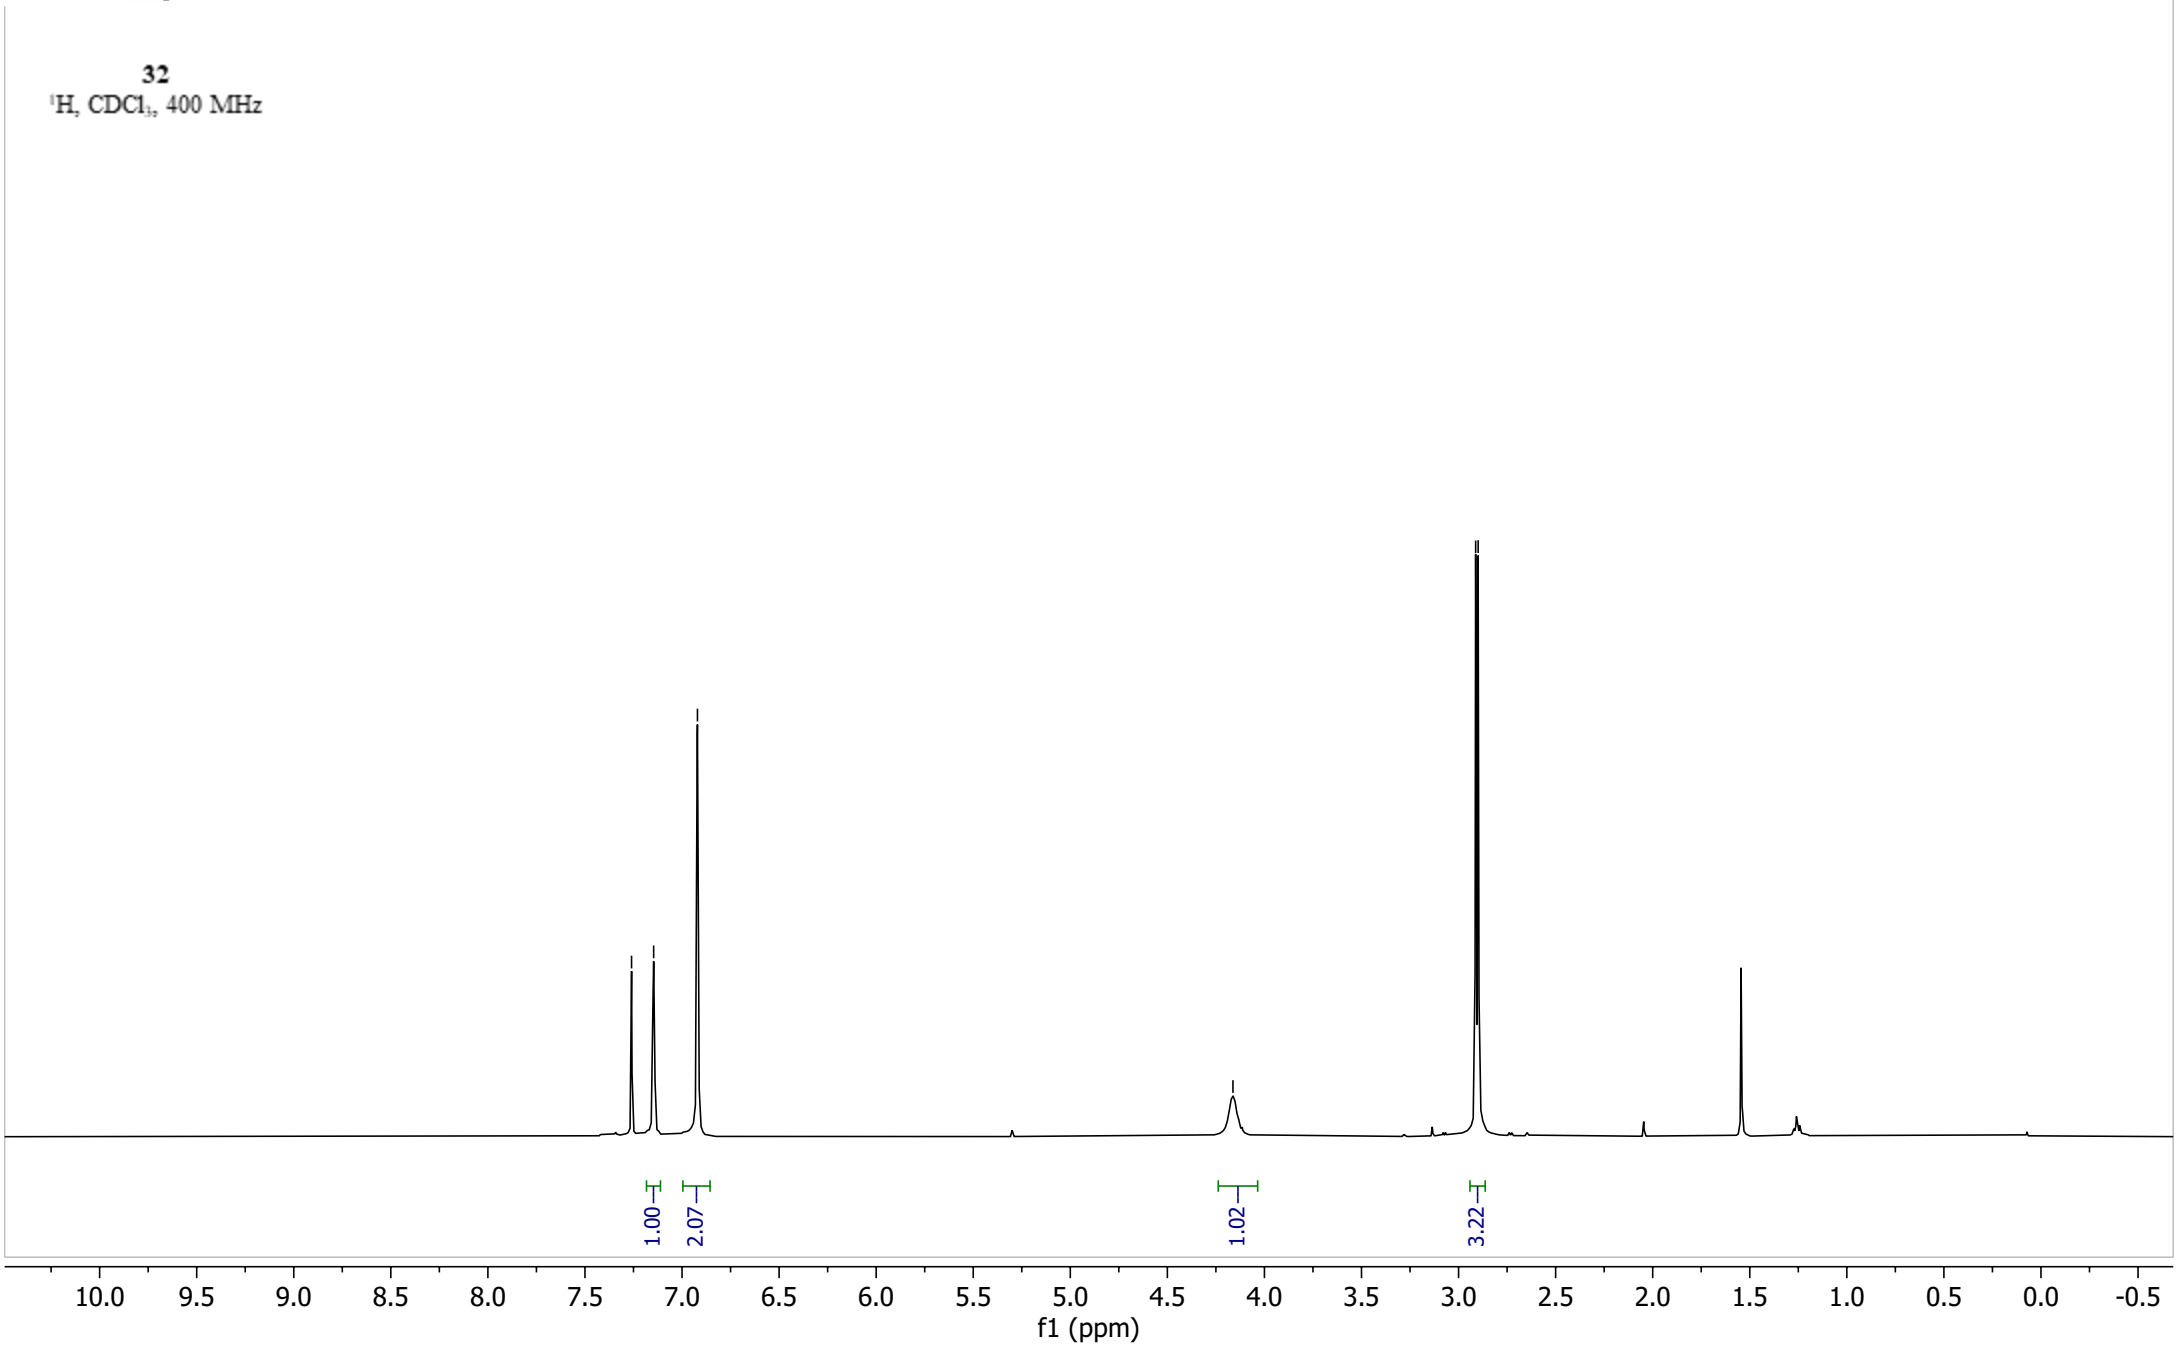



**32**  
<sup>13</sup>C, CDCl<sub>3</sub>, 101 MHz

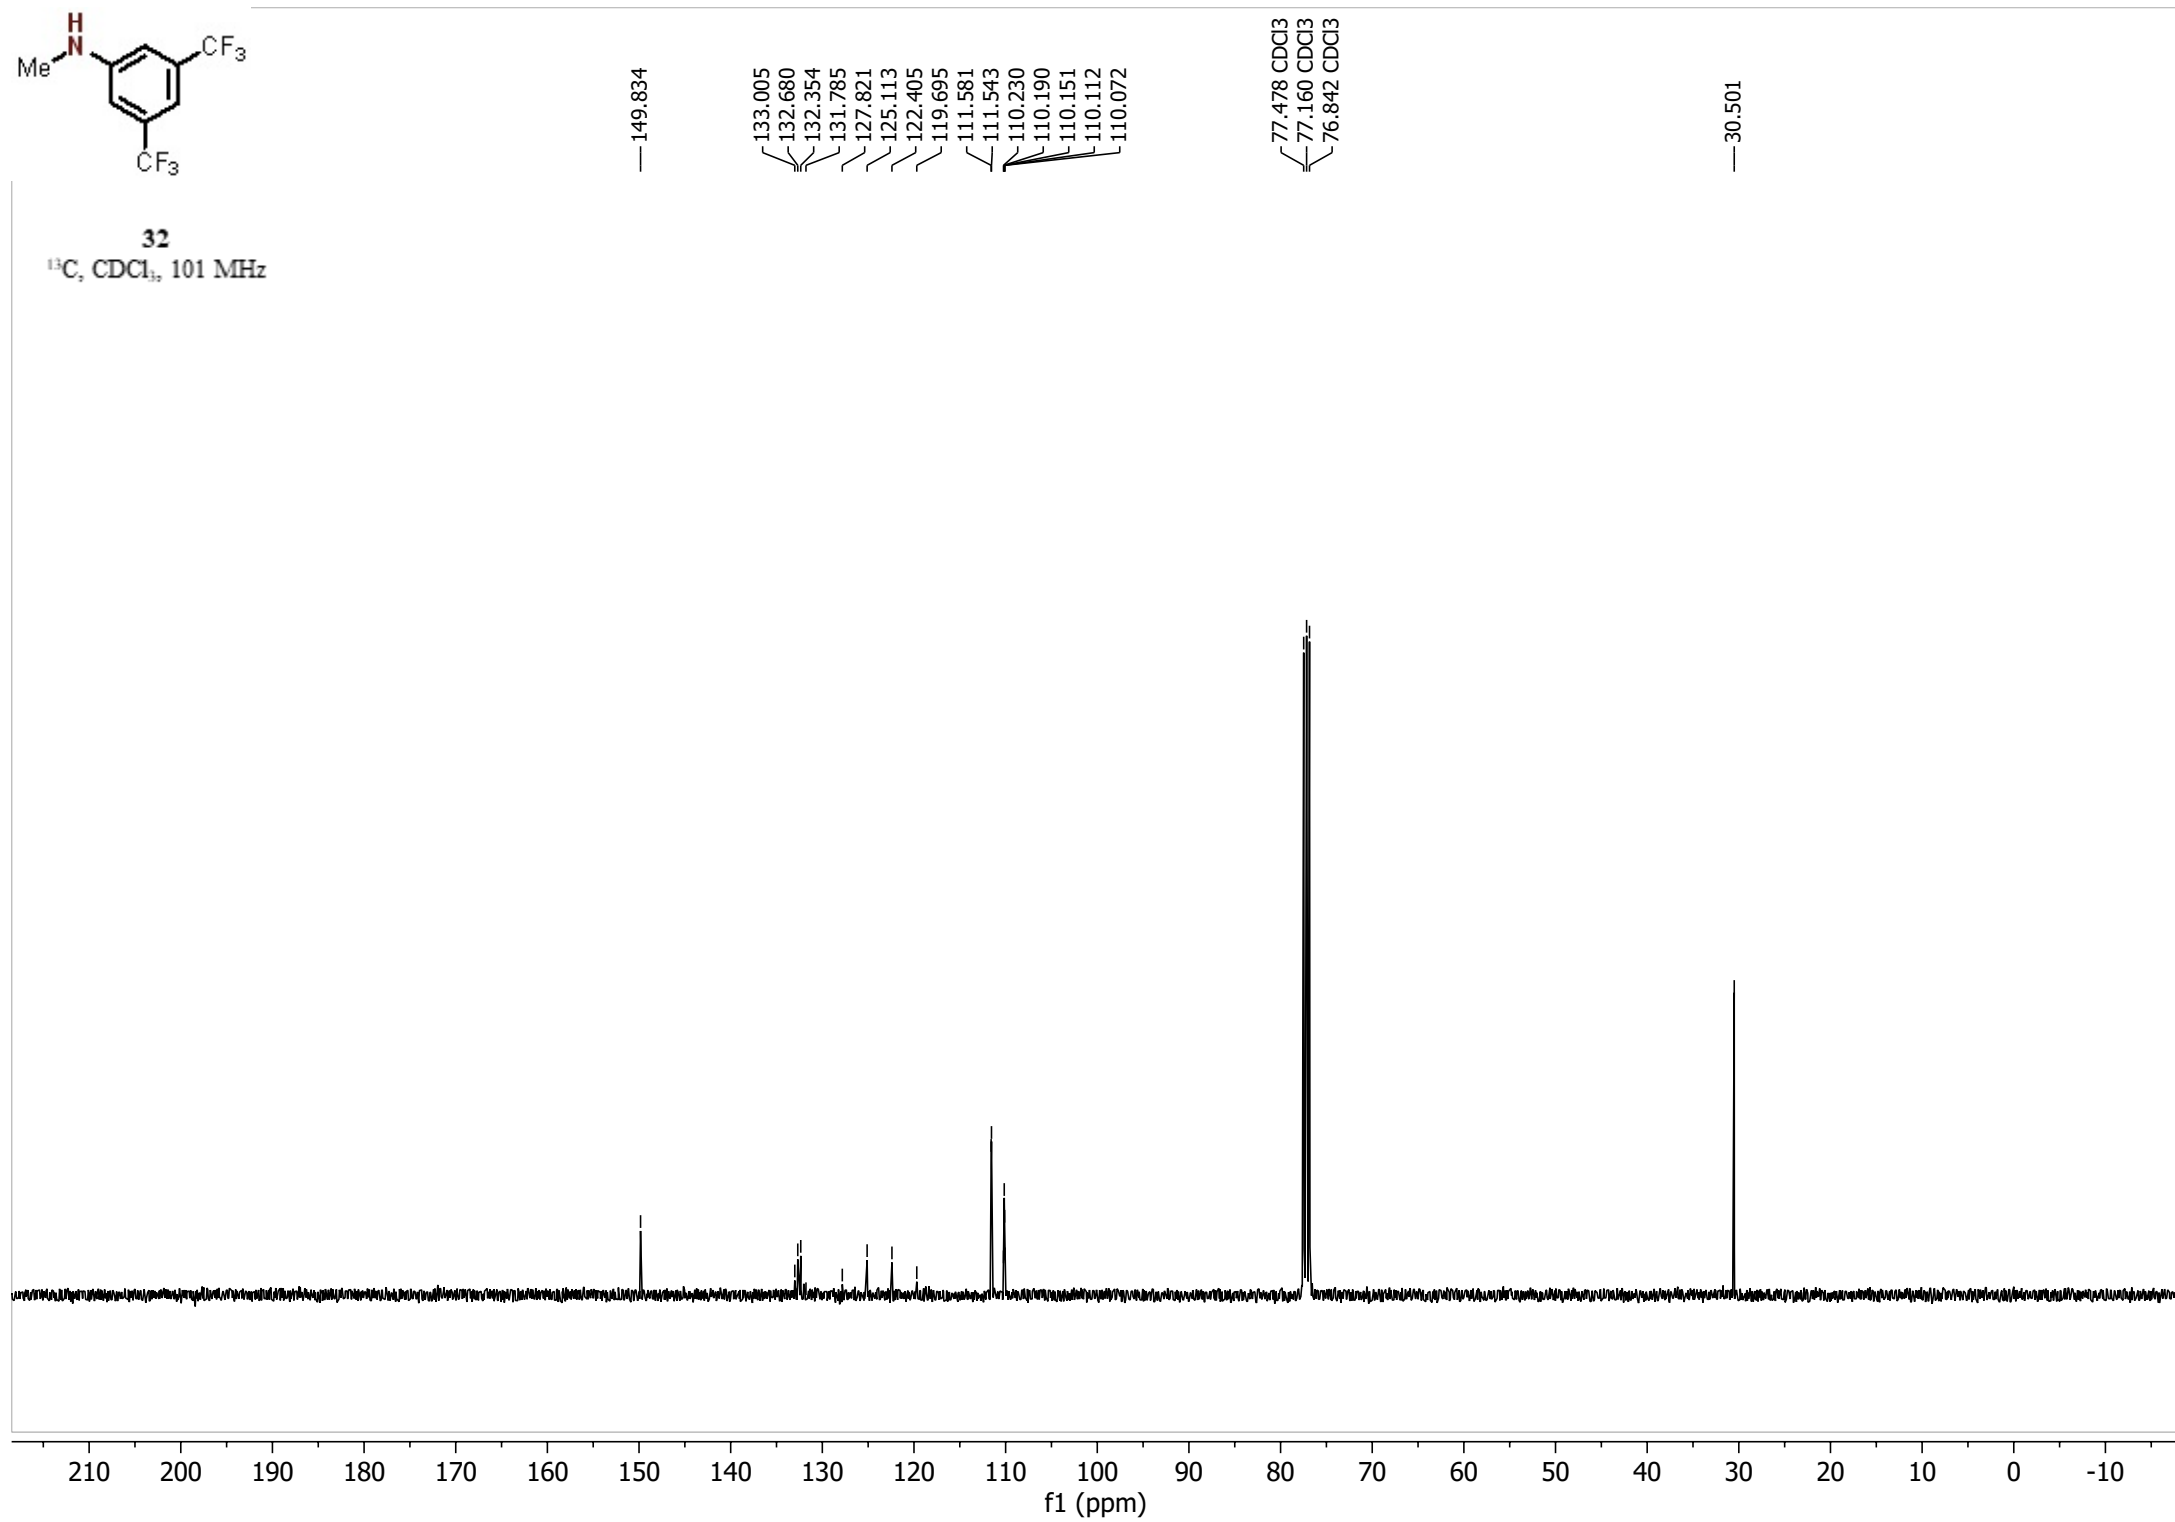

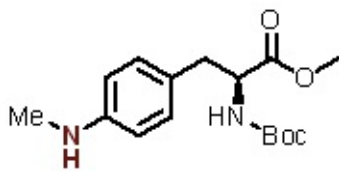

33

<sup>1</sup>H, CDCl<sub>3</sub>, 400 MHz

7.260 CDCl<sub>3</sub>  
6.950  
6.943  
6.938  
6.926  
6.921  
6.915  
6.568  
6.561  
6.556  
6.544  
6.539  
6.532

4.947  
4.927  
4.528  
4.513  
4.495  
4.478

3.770  
3.711

2.984  
2.975  
2.967  
2.818

1.420

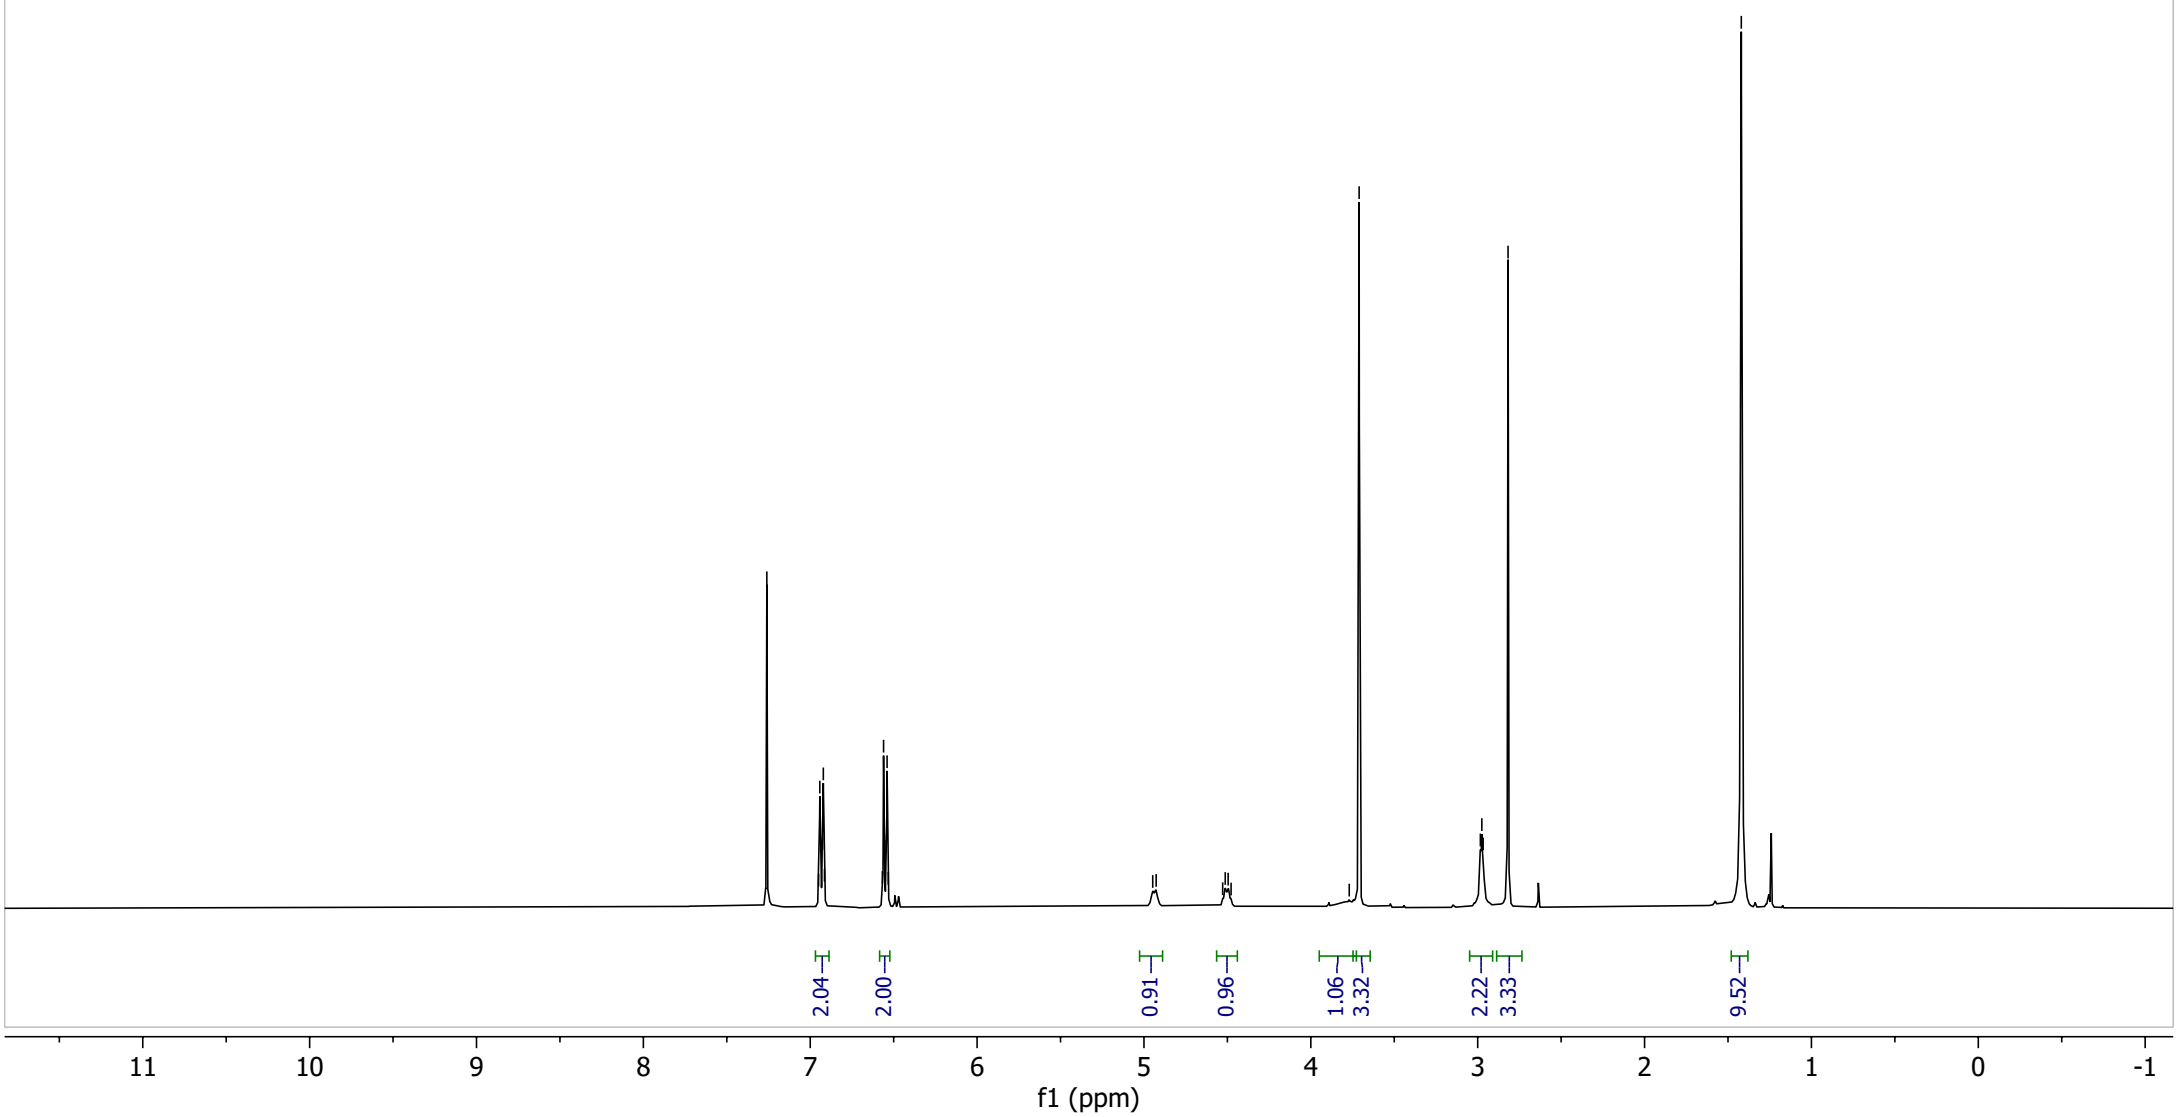



33

$^{13}\text{C}$ ,  $\text{CDCl}_3$ , 101 MHz

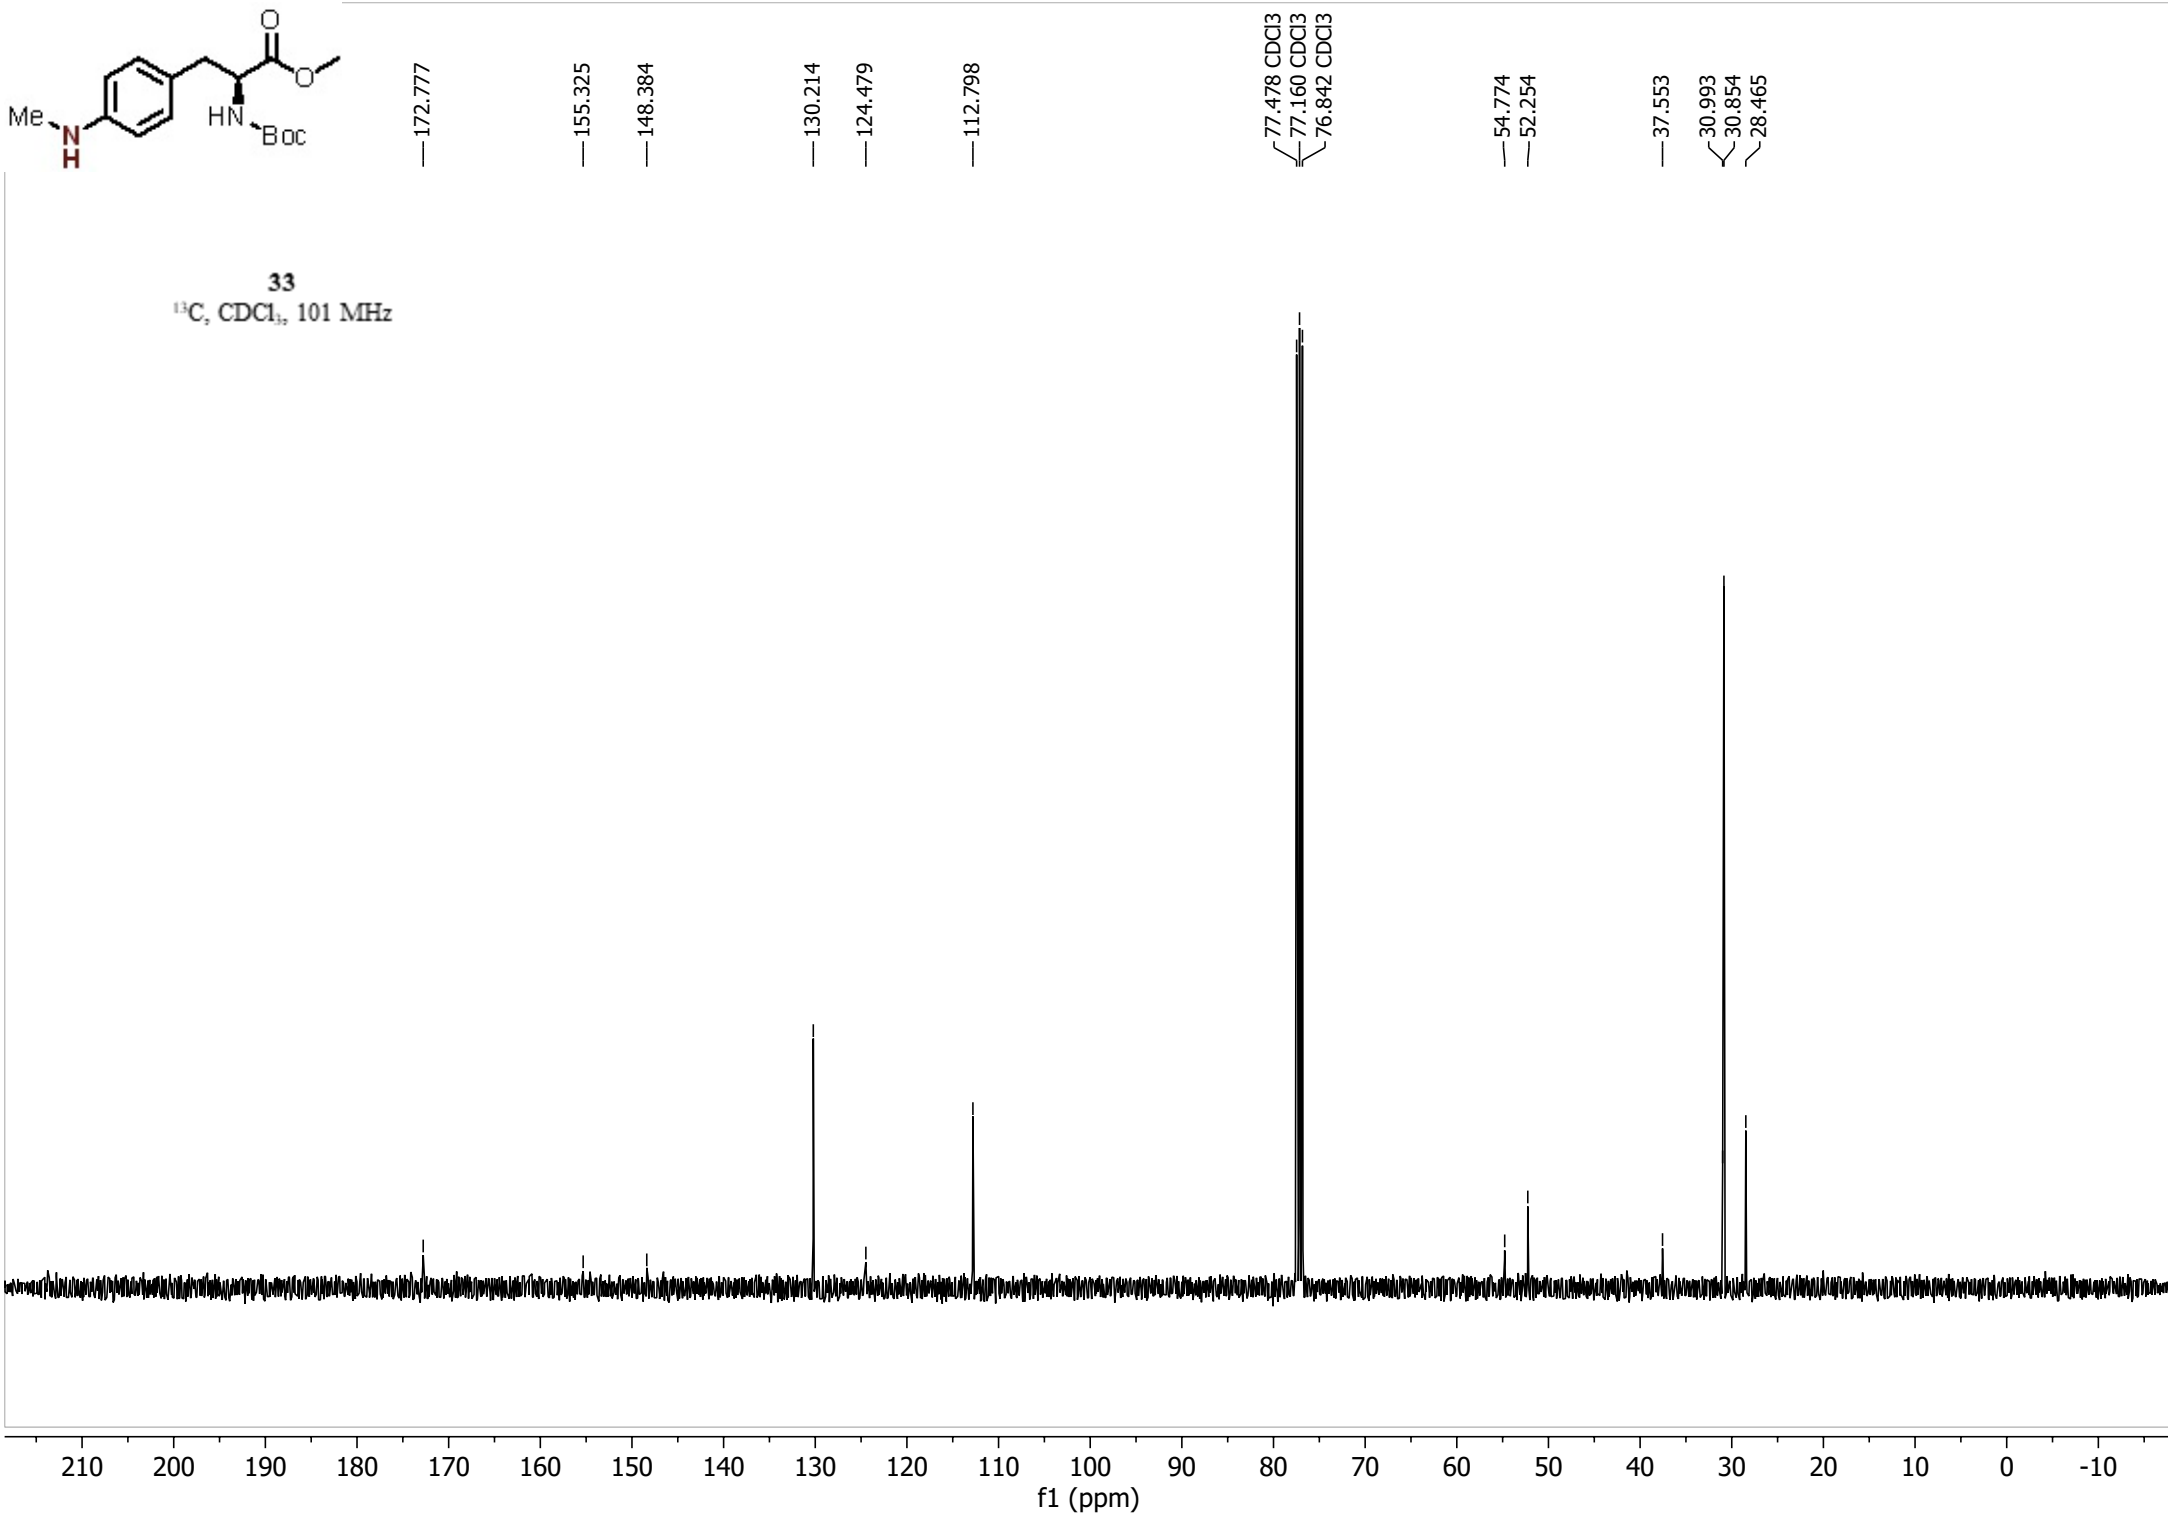

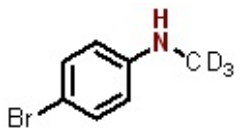

**5b**  
<sup>1</sup>H, CDCl<sub>3</sub>, 400 MHz

7.277  
7.268  
7.260 CDCl<sub>3</sub>  
7.251  
7.246  
7.237  
6.490  
6.489  
6.484  
6.472  
6.467  
6.458

— 3.700

— 2.771

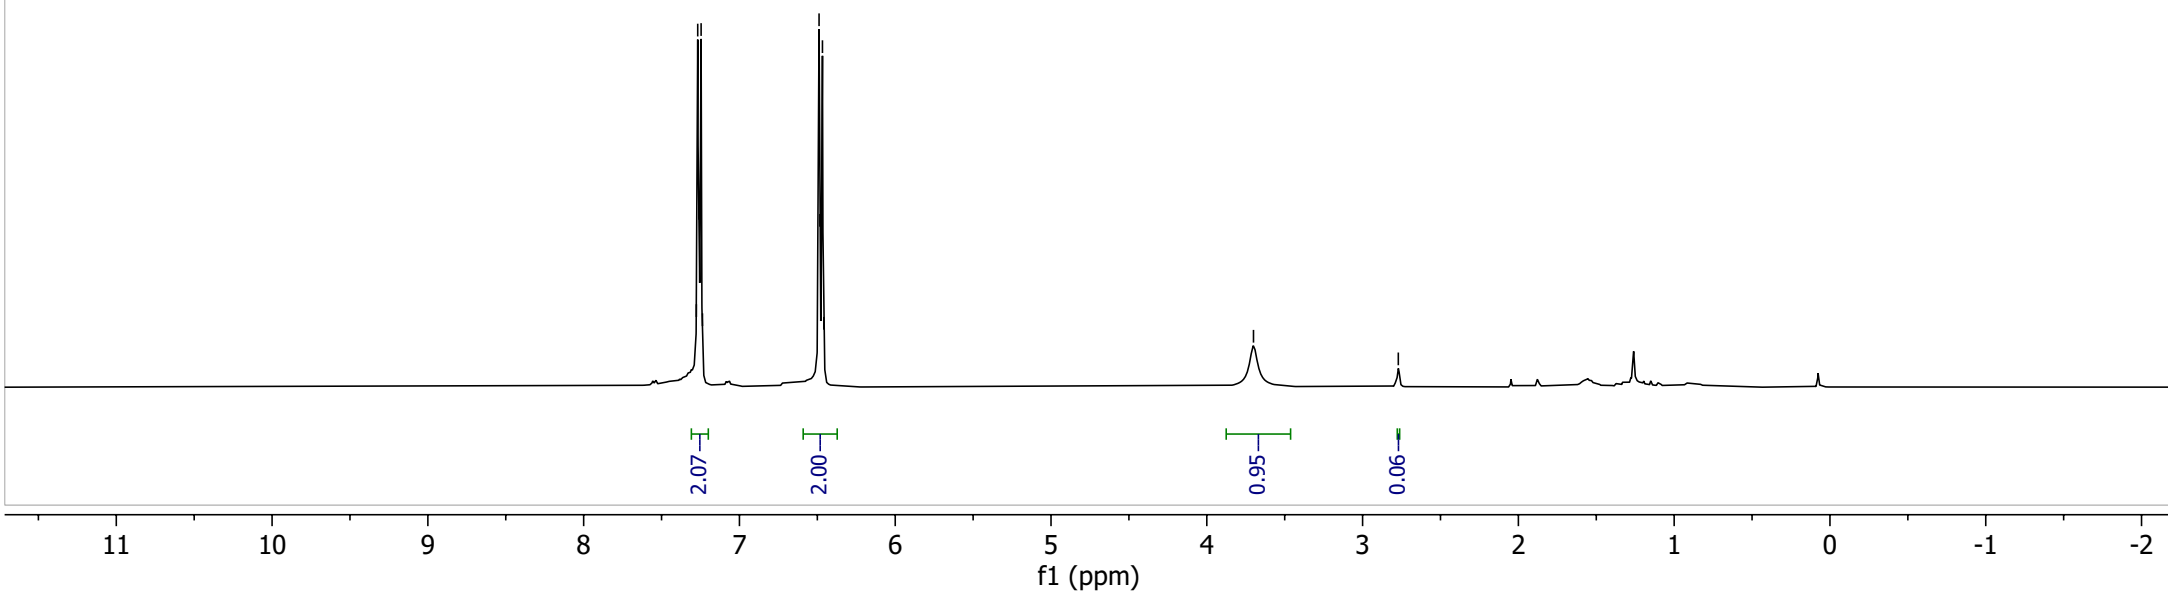

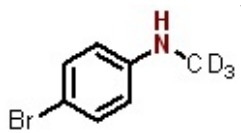

7.261

2.788

**5b**  
<sup>1</sup>H, CDCl<sub>3</sub>, 61 MHz

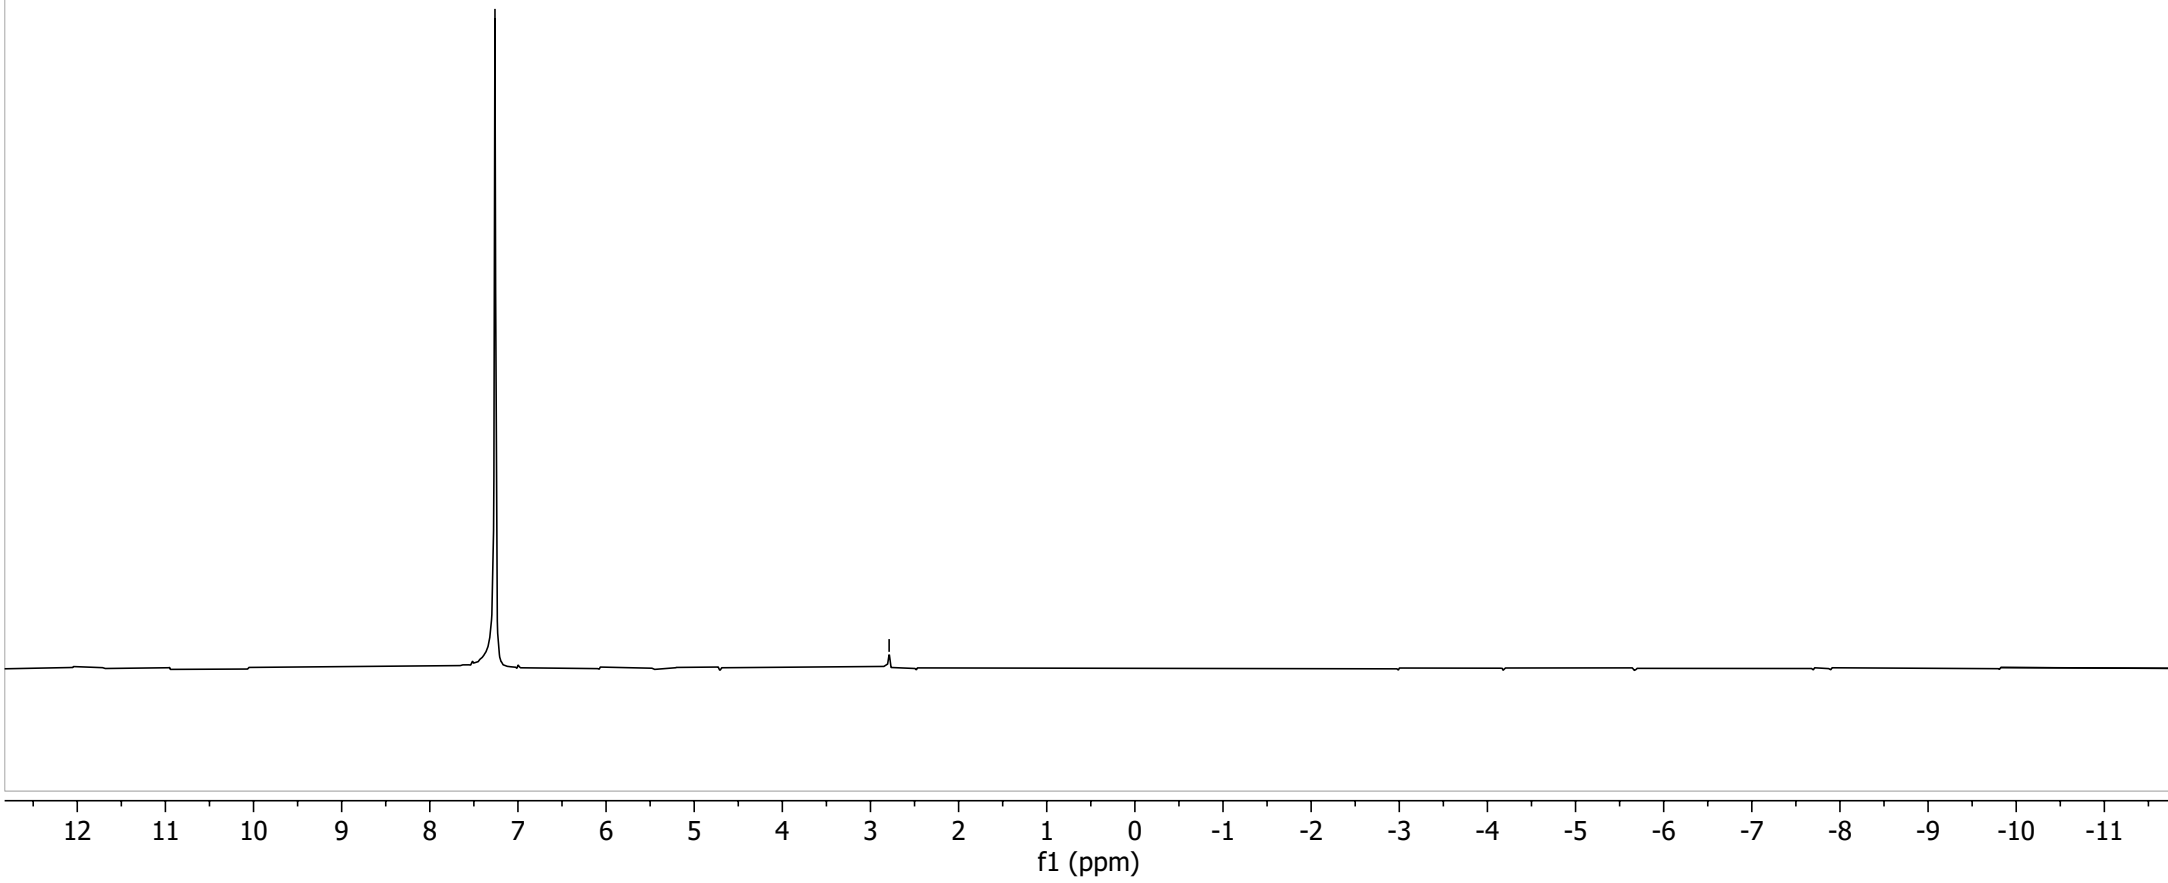



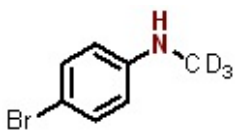

**5b**

<sup>13</sup>C, CDCl<sub>3</sub>, 101 MHz

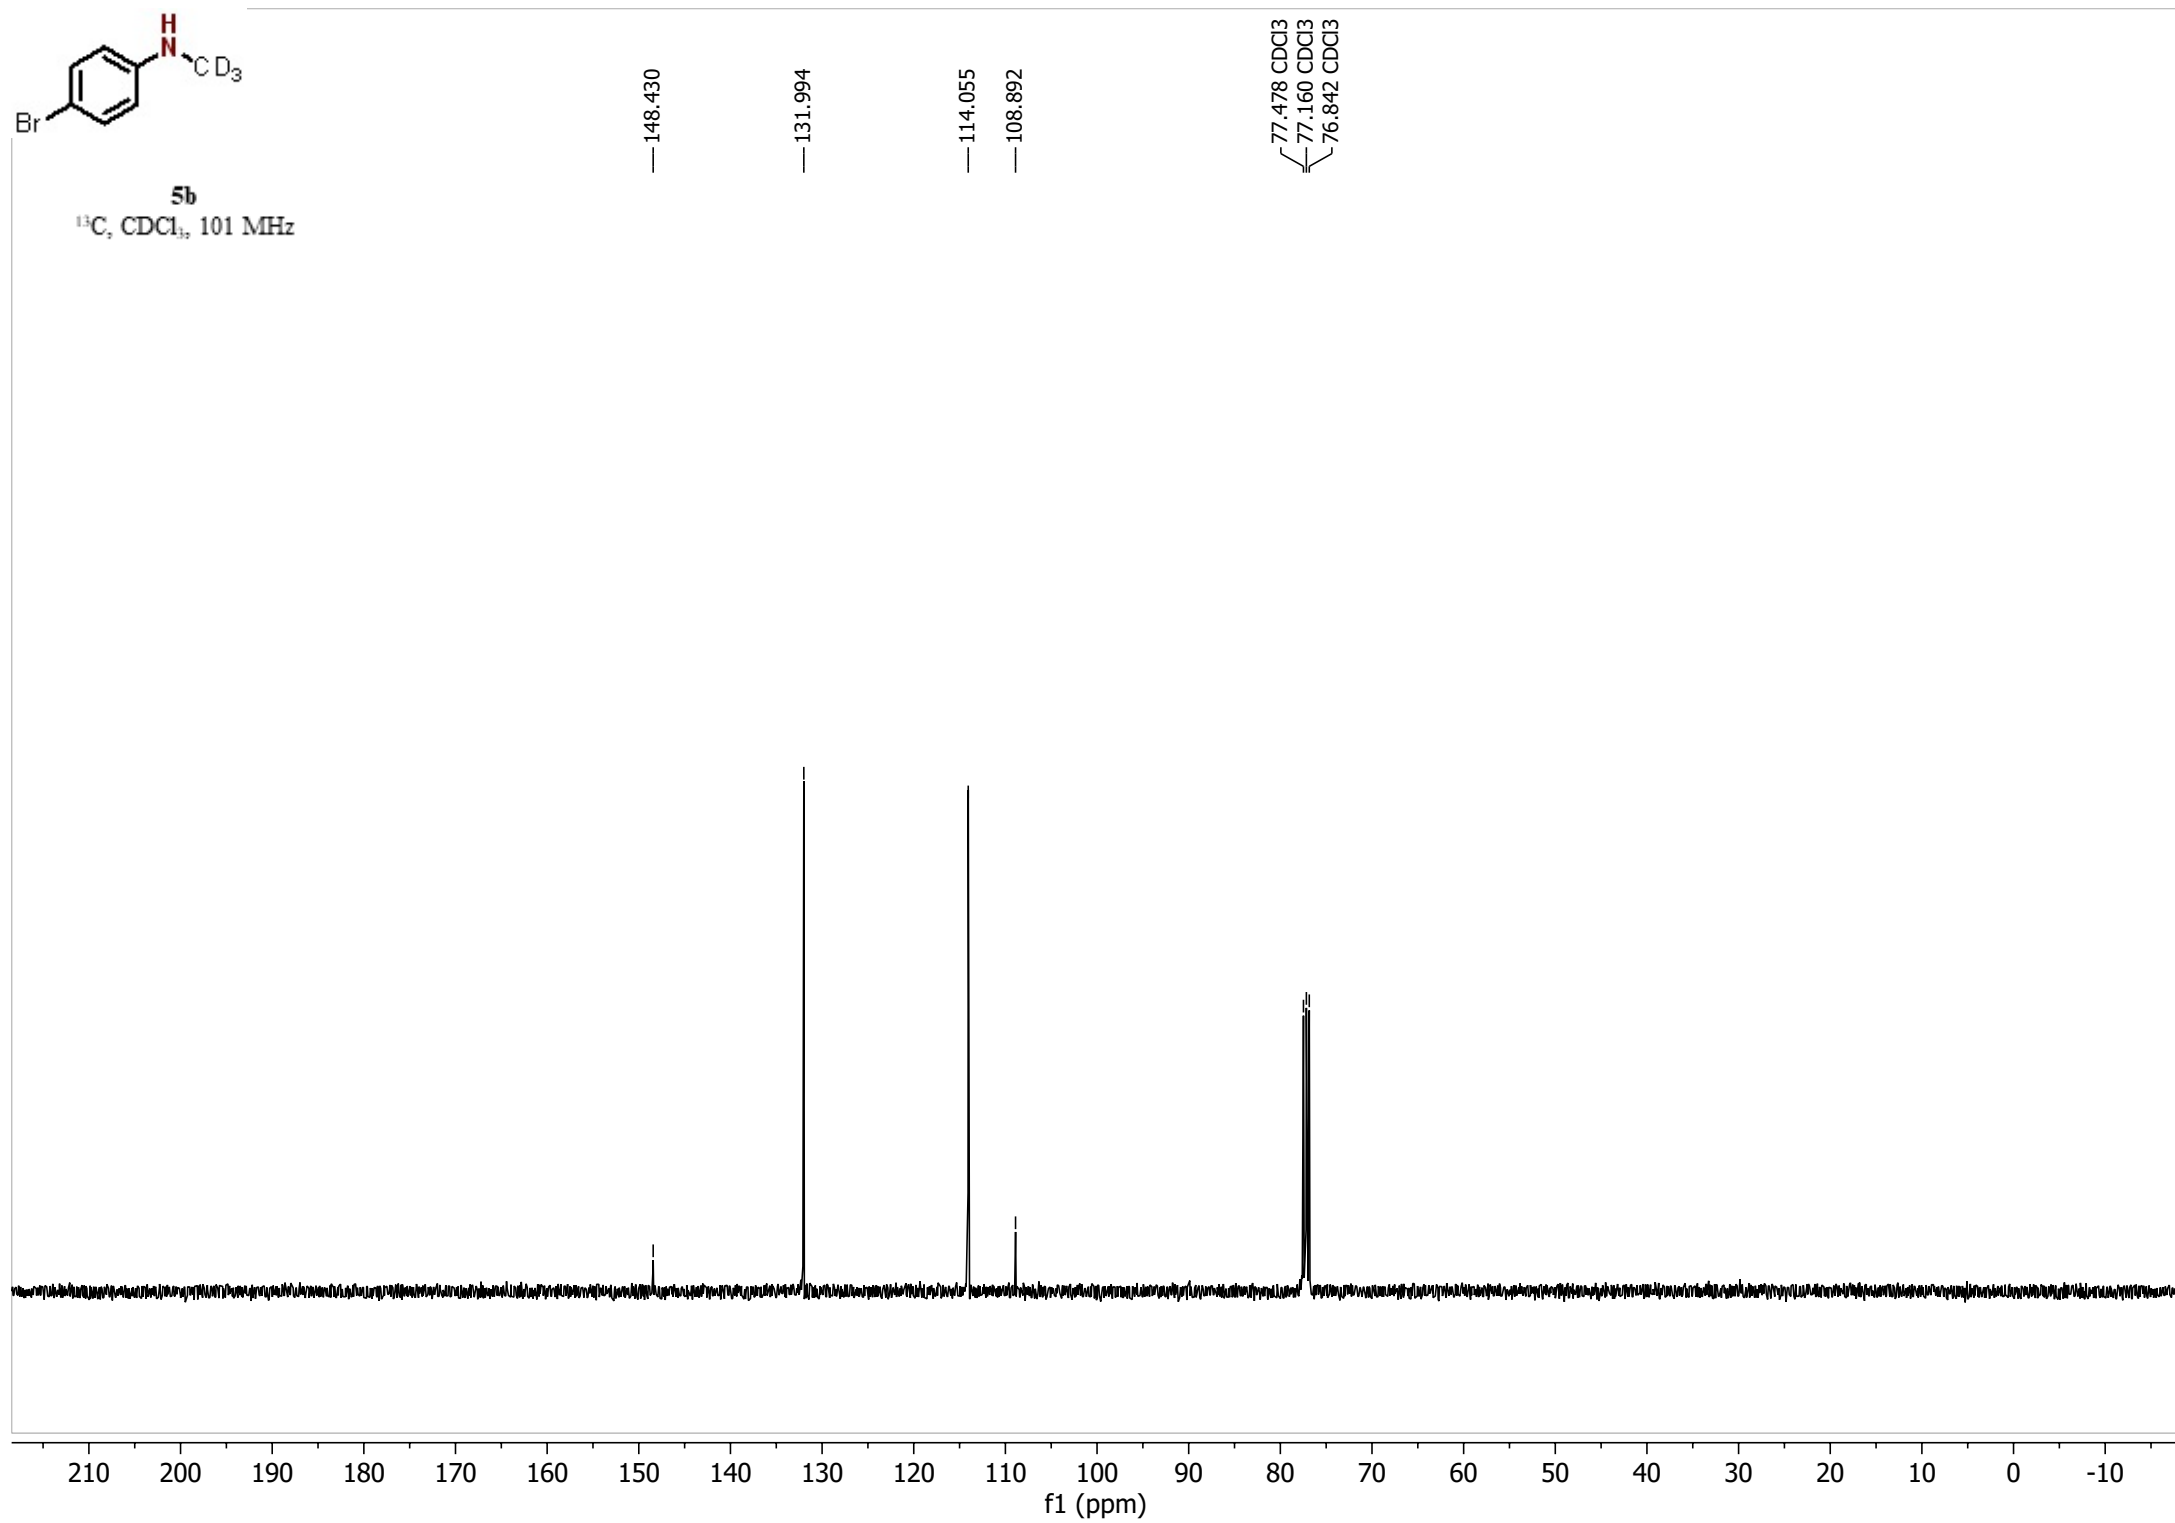

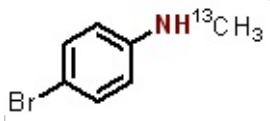

7.265  
7.260  
7.243  
7.238  
6.493  
6.487  
6.470  
6.465

3.817

2.967  
2.961  
2.628  
2.622

5c  
<sup>1</sup>H, CDCl<sub>3</sub>, 400 MHz

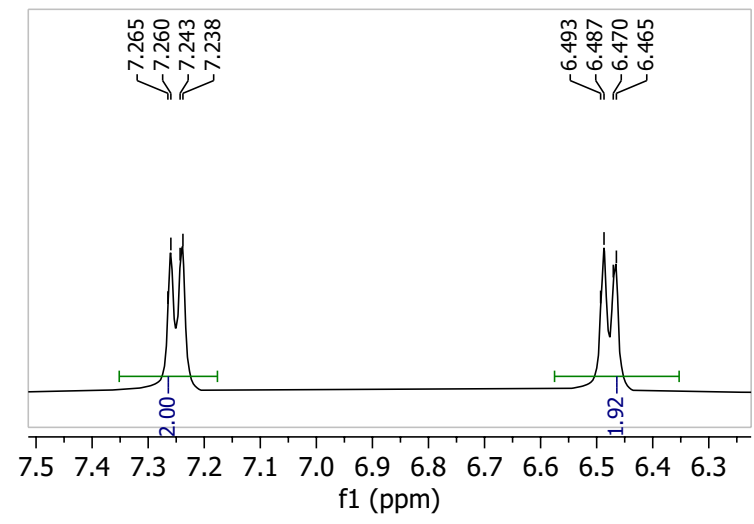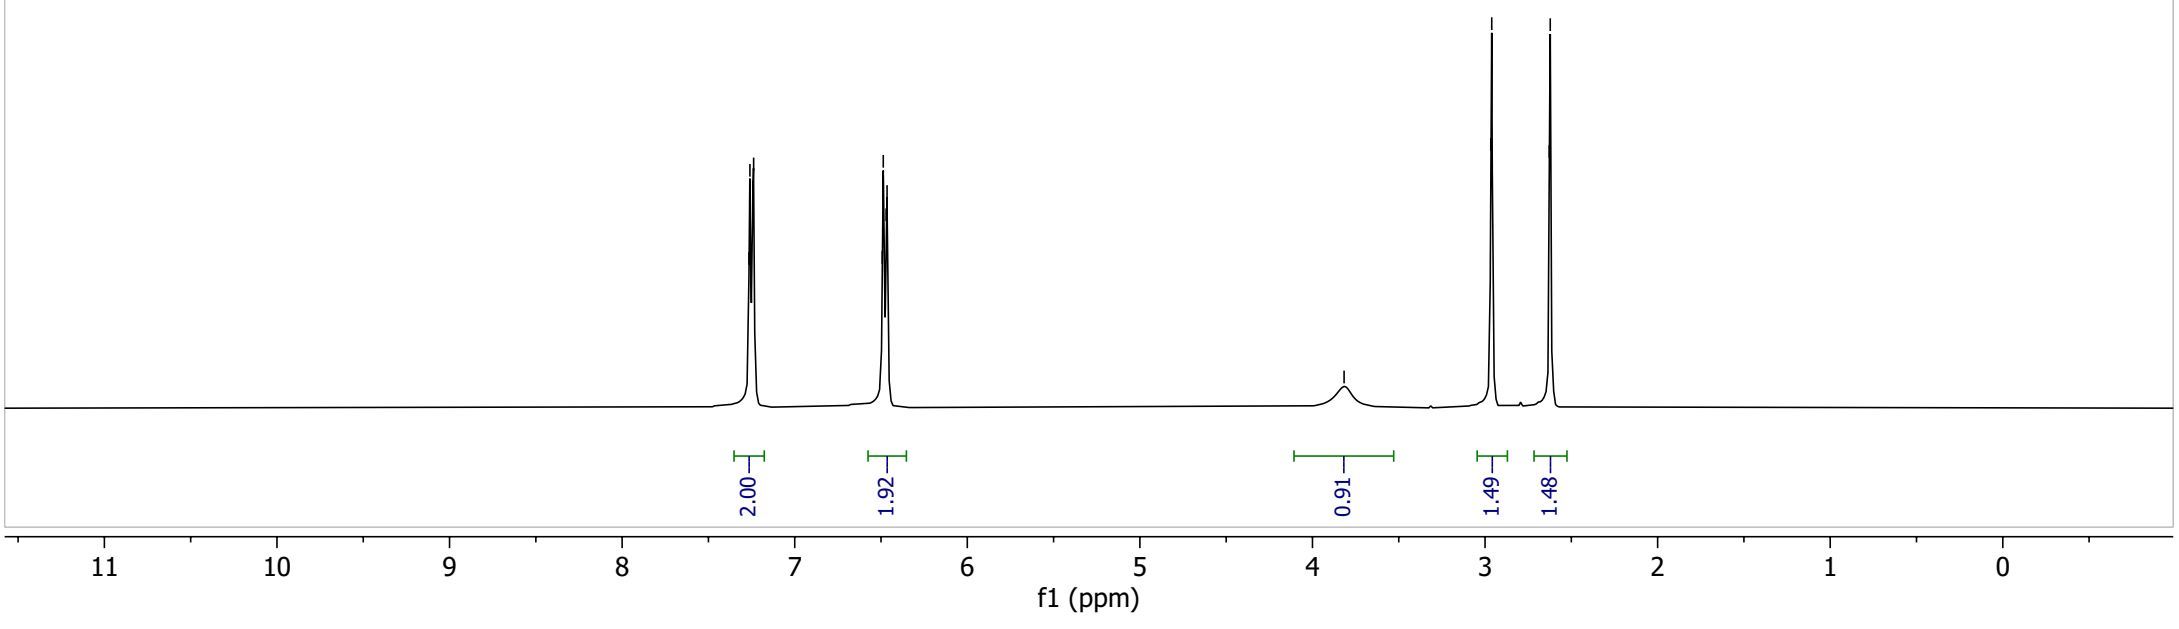

2.00

1.92

0.91

1.49

1.48

f1 (ppm)

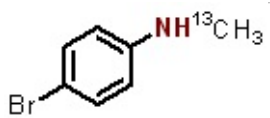

5c  
 $^{13}\text{C}$ ,  $\text{CDCl}_3$ , 101 MHz

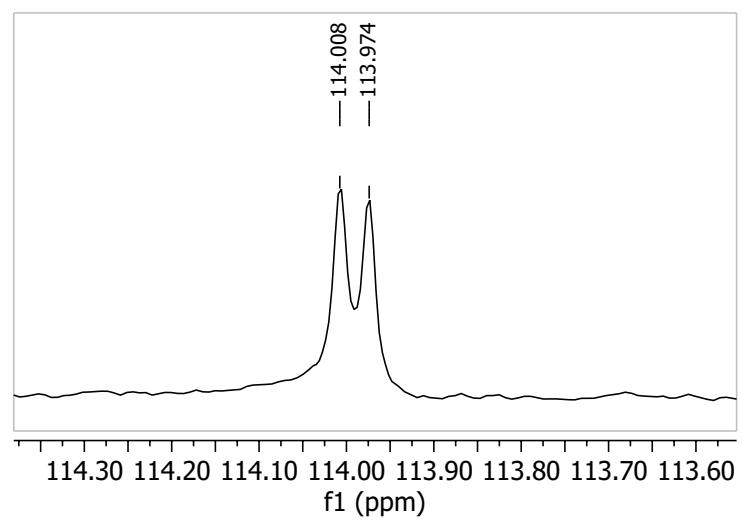

148.109  
131.842  
114.008  
113.974  
108.889  
77.318  
77.001  
76.683  
30.738

210 200 190 180 170 160 150 140 130 120 110 100 90 80 70 60 50 40 30 20 10 0 -10  
f1 (ppm)

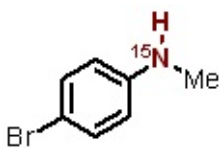

5d

$^1\text{H}$ ,  $\text{CDCl}_3$ , 400 MHz

7.285  
7.277  
7.271  
7.260  
7.255  
7.247  
6.528  
6.519  
6.515  
6.509  
6.503  
6.498  
6.493

3.934

2.810

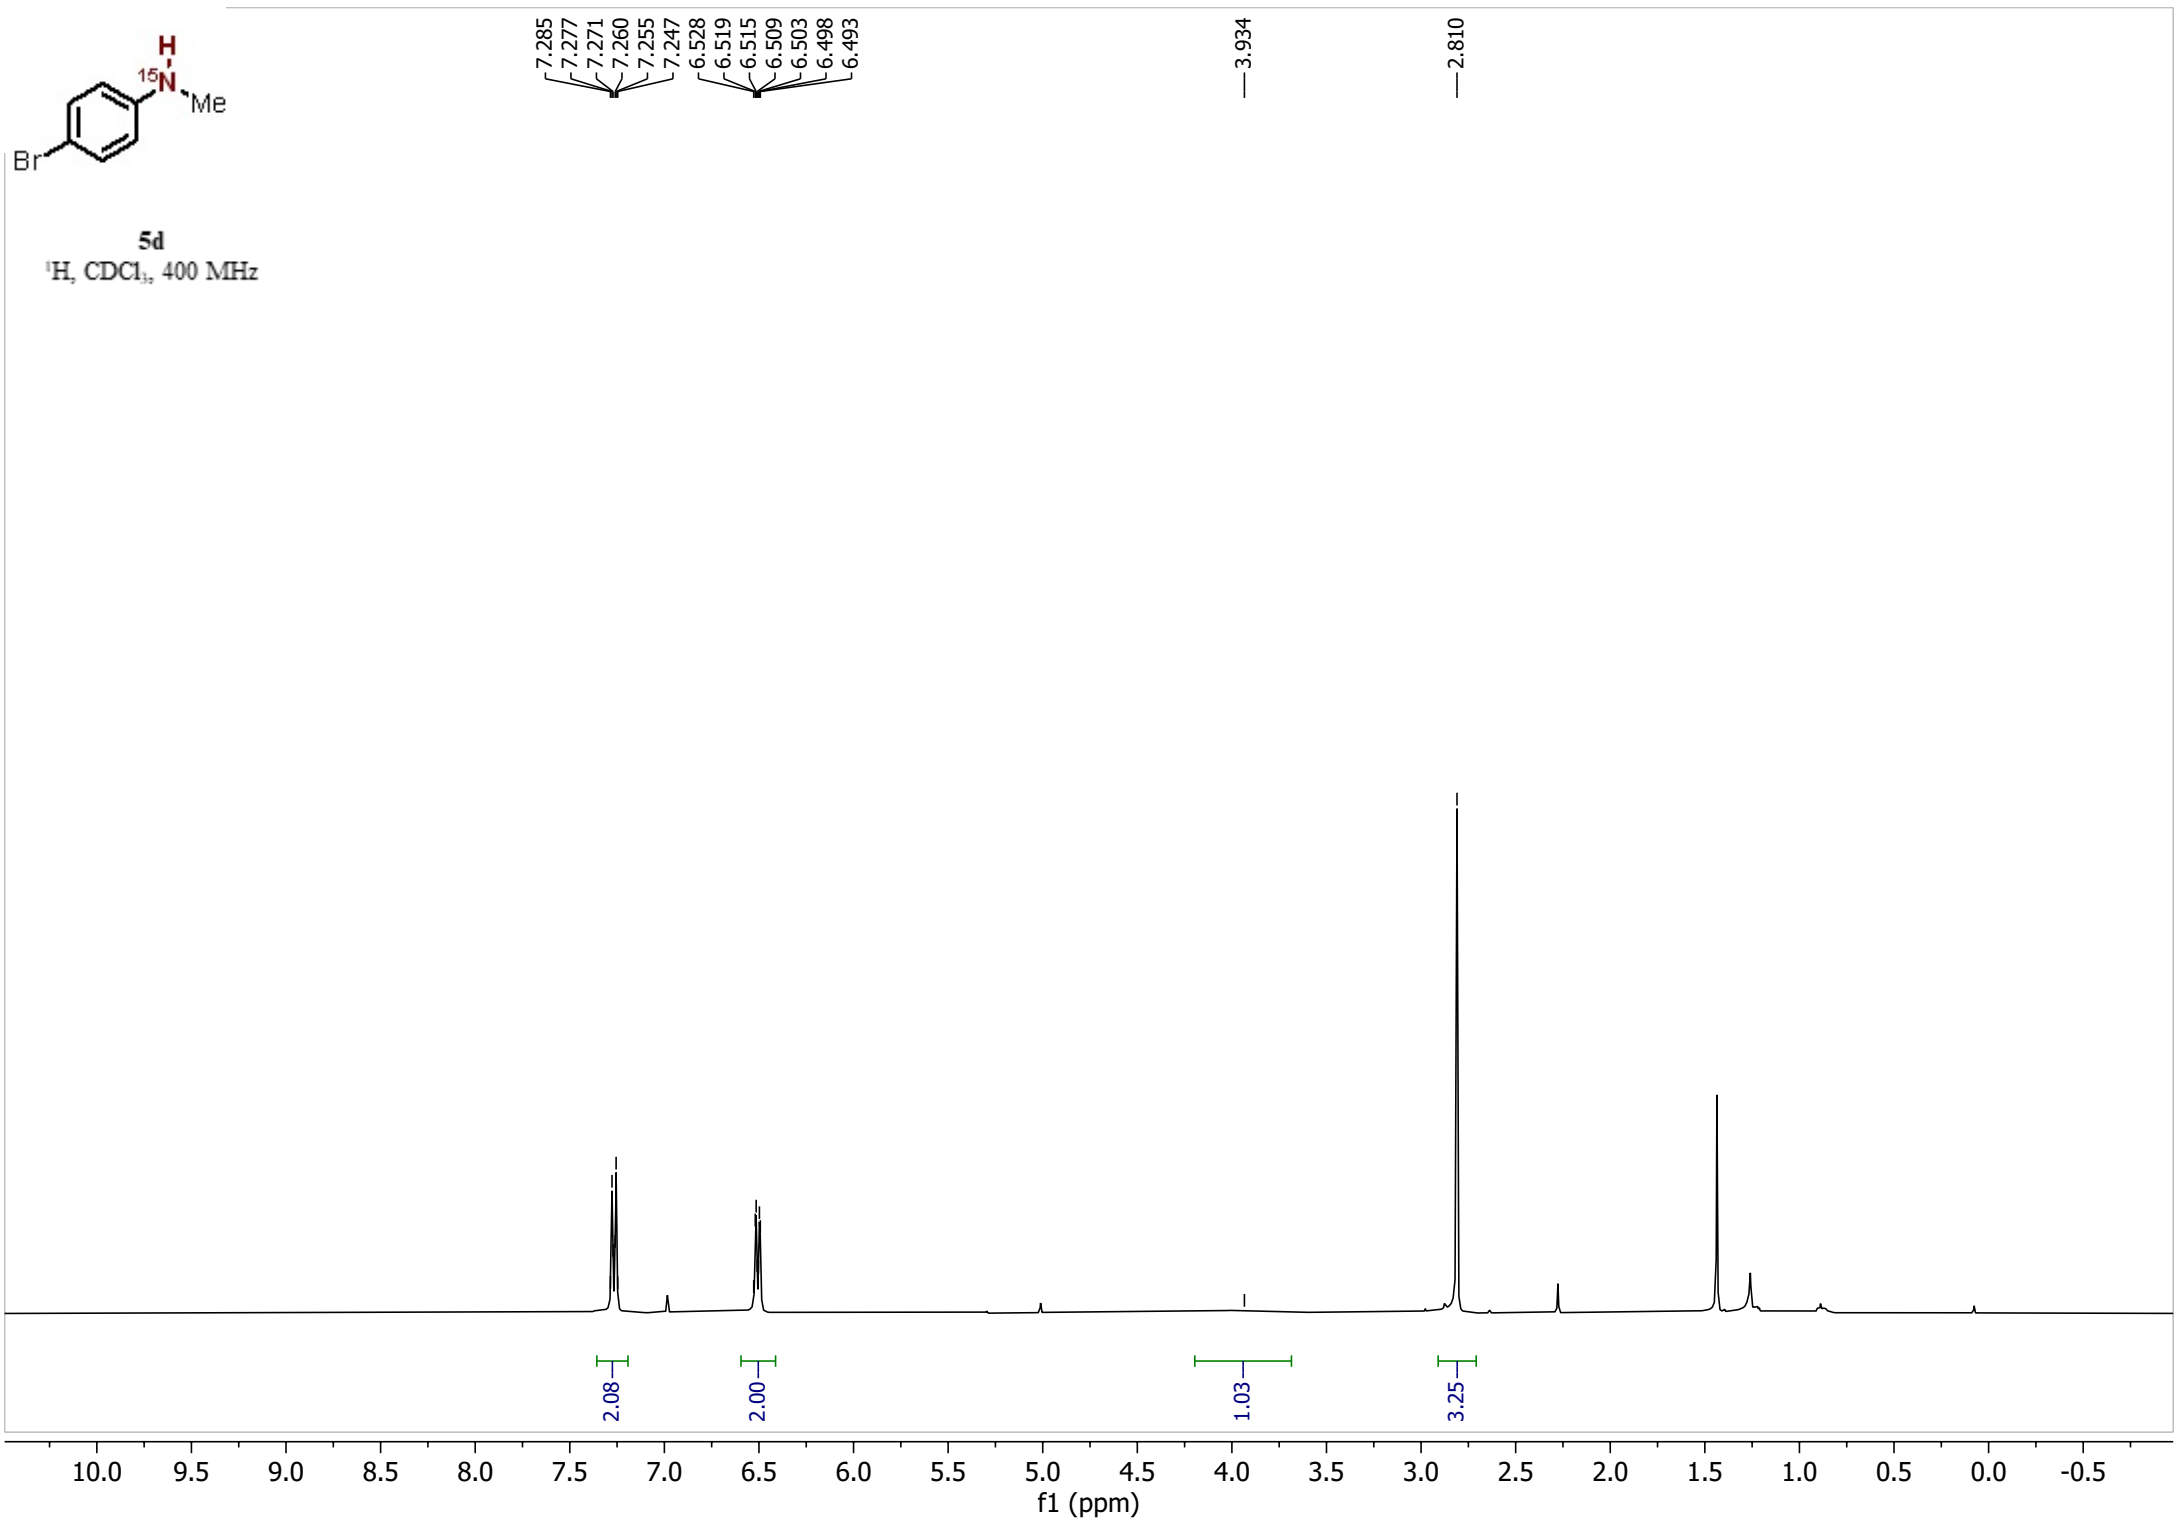

2.08

2.00

1.03

3.25

10.0 9.5 9.0 8.5 8.0 7.5 7.0 6.5 6.0 5.5 5.0 4.5 4.0 3.5 3.0 2.5 2.0 1.5 1.0 0.5 0.0 -0.5

f1 (ppm)

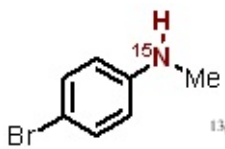

**5d**  
<sup>13</sup>C, CDCl<sub>3</sub>, 101 MHz

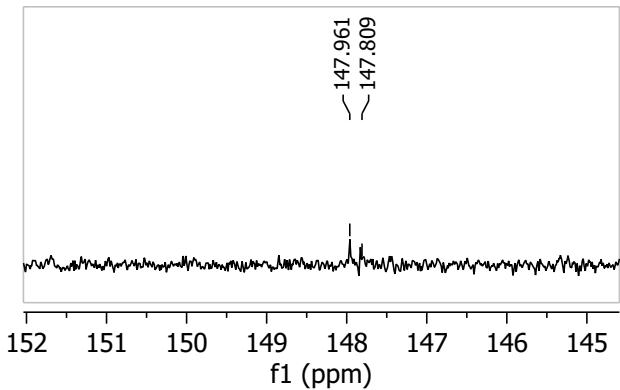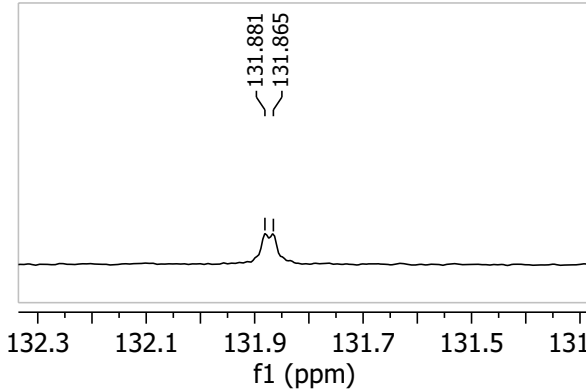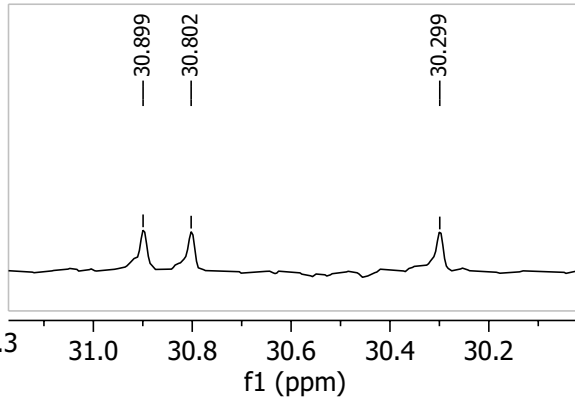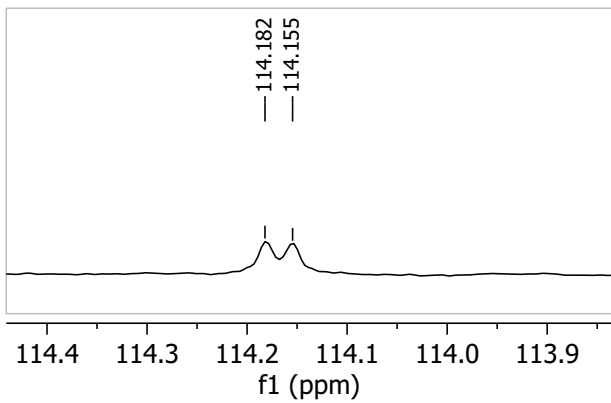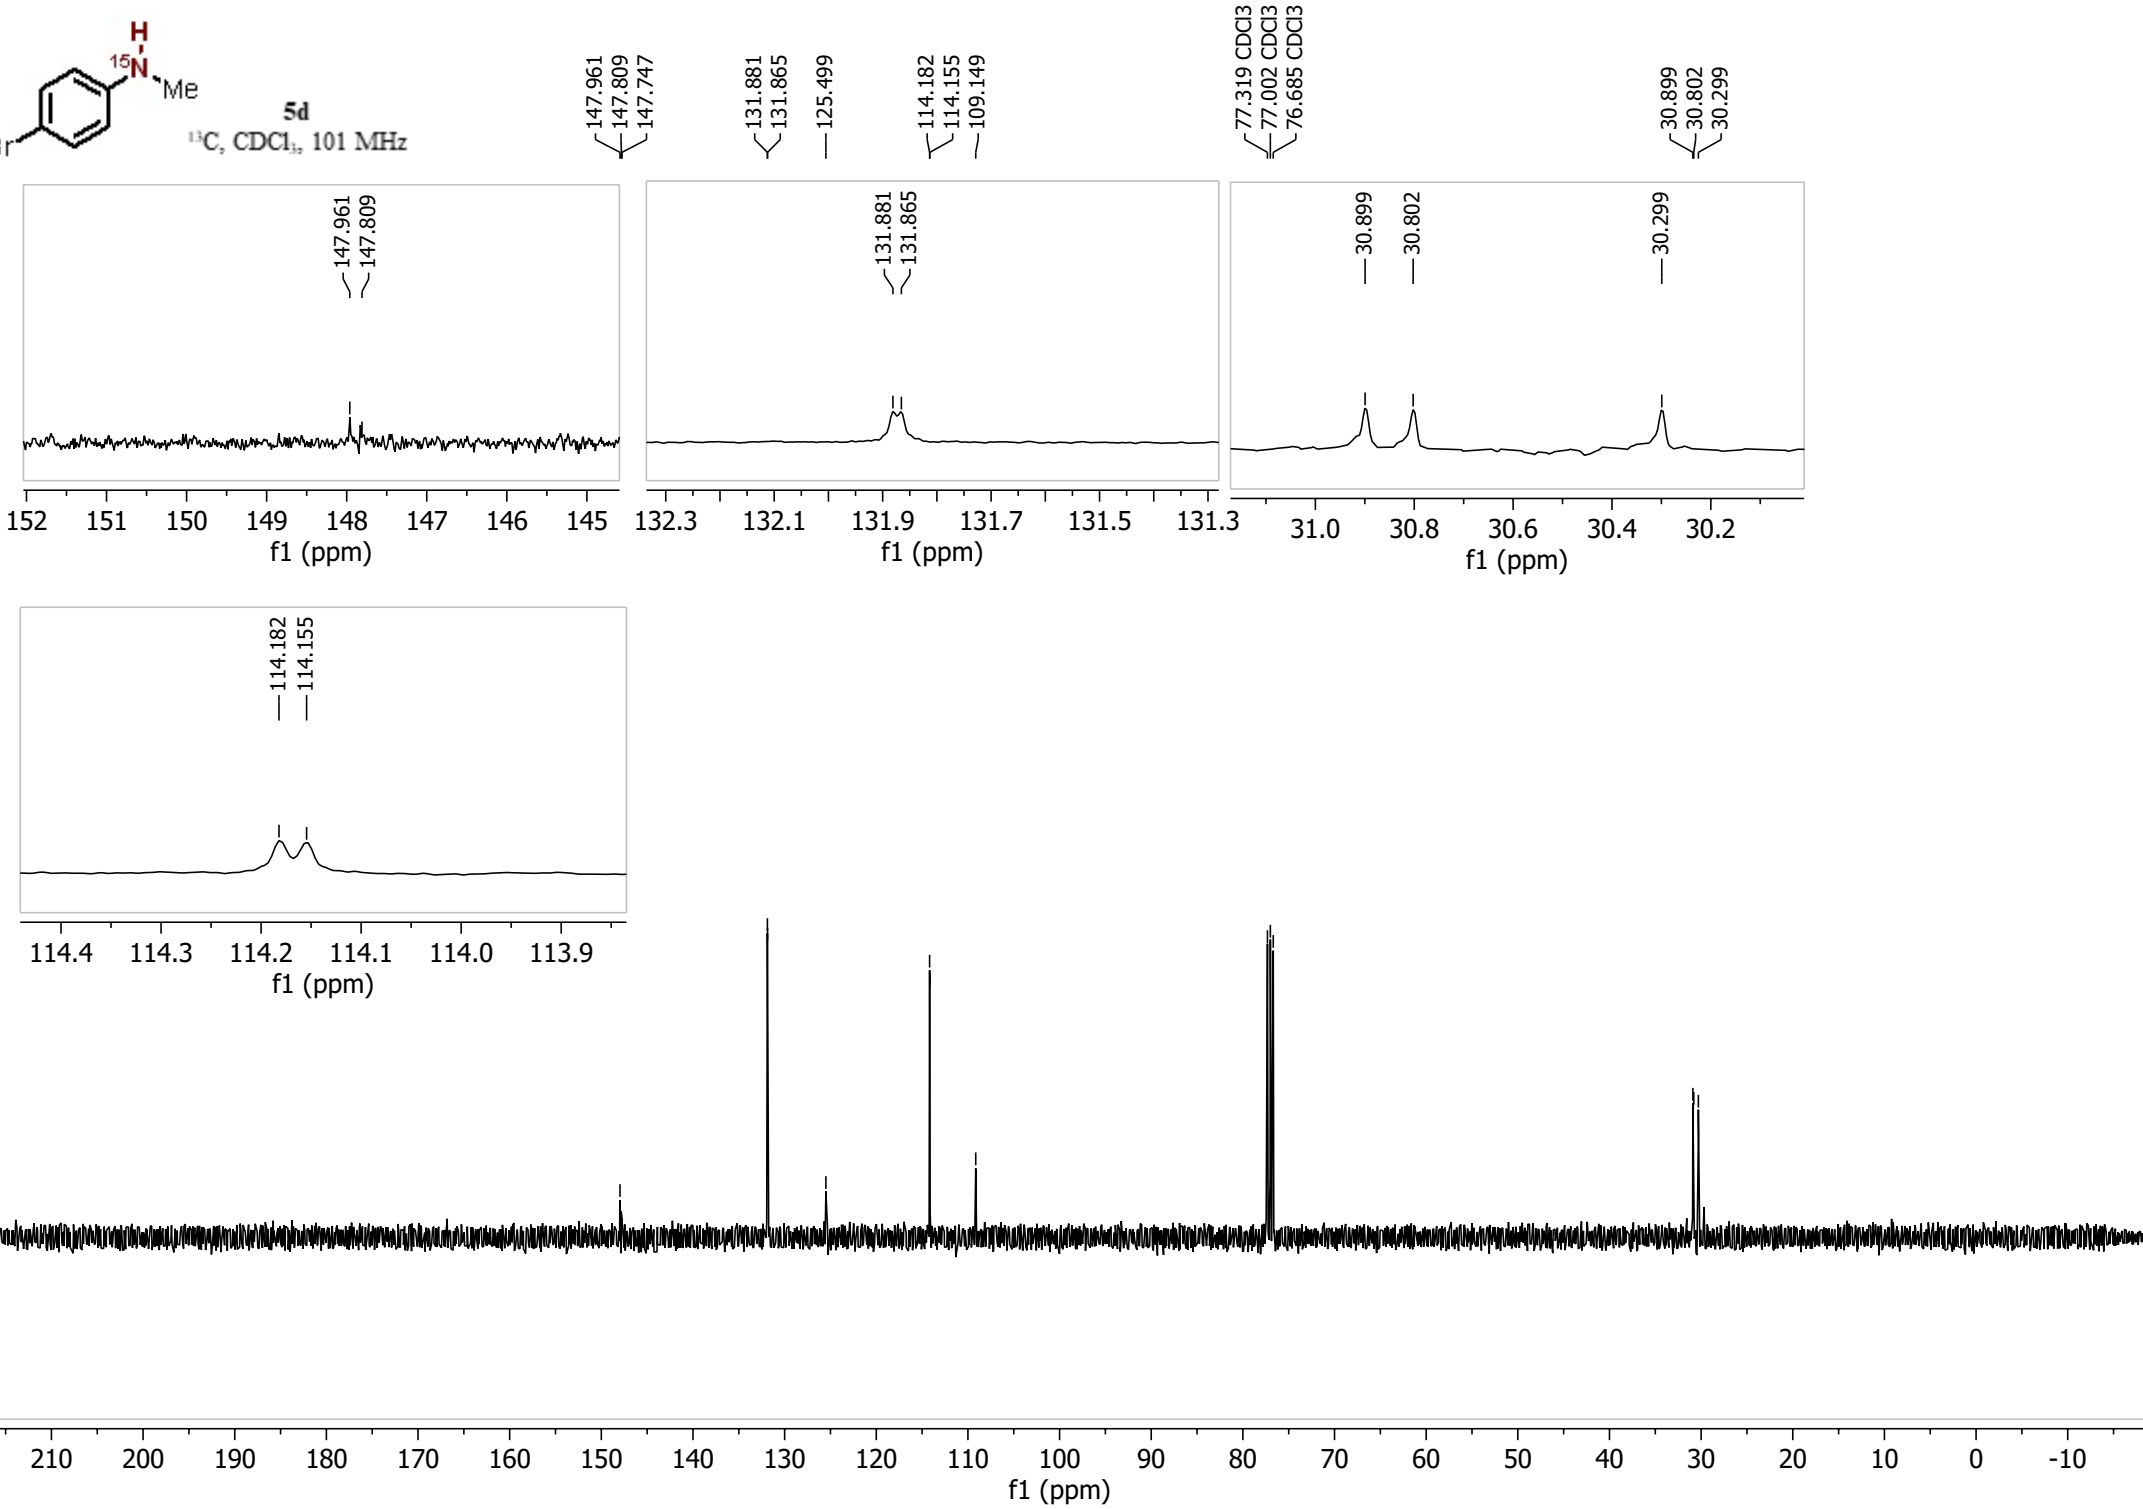

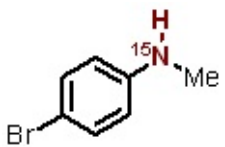

**5d**  
 $^{15}\text{N}$ ,  $\text{CDCl}_3$ , 41 MHz

—52.417

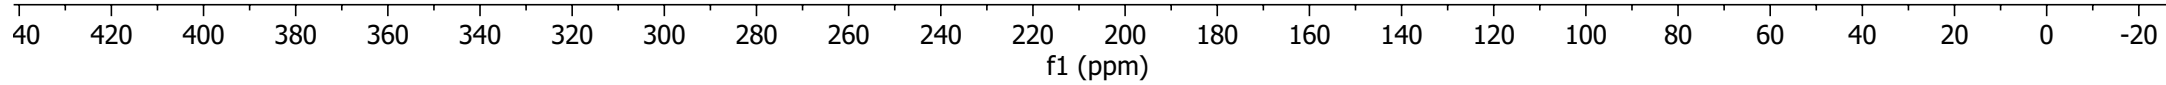

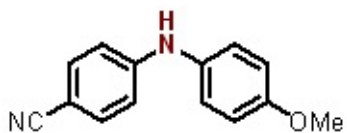

37  
<sup>1</sup>H, CDCl<sub>3</sub>, 400 MHz

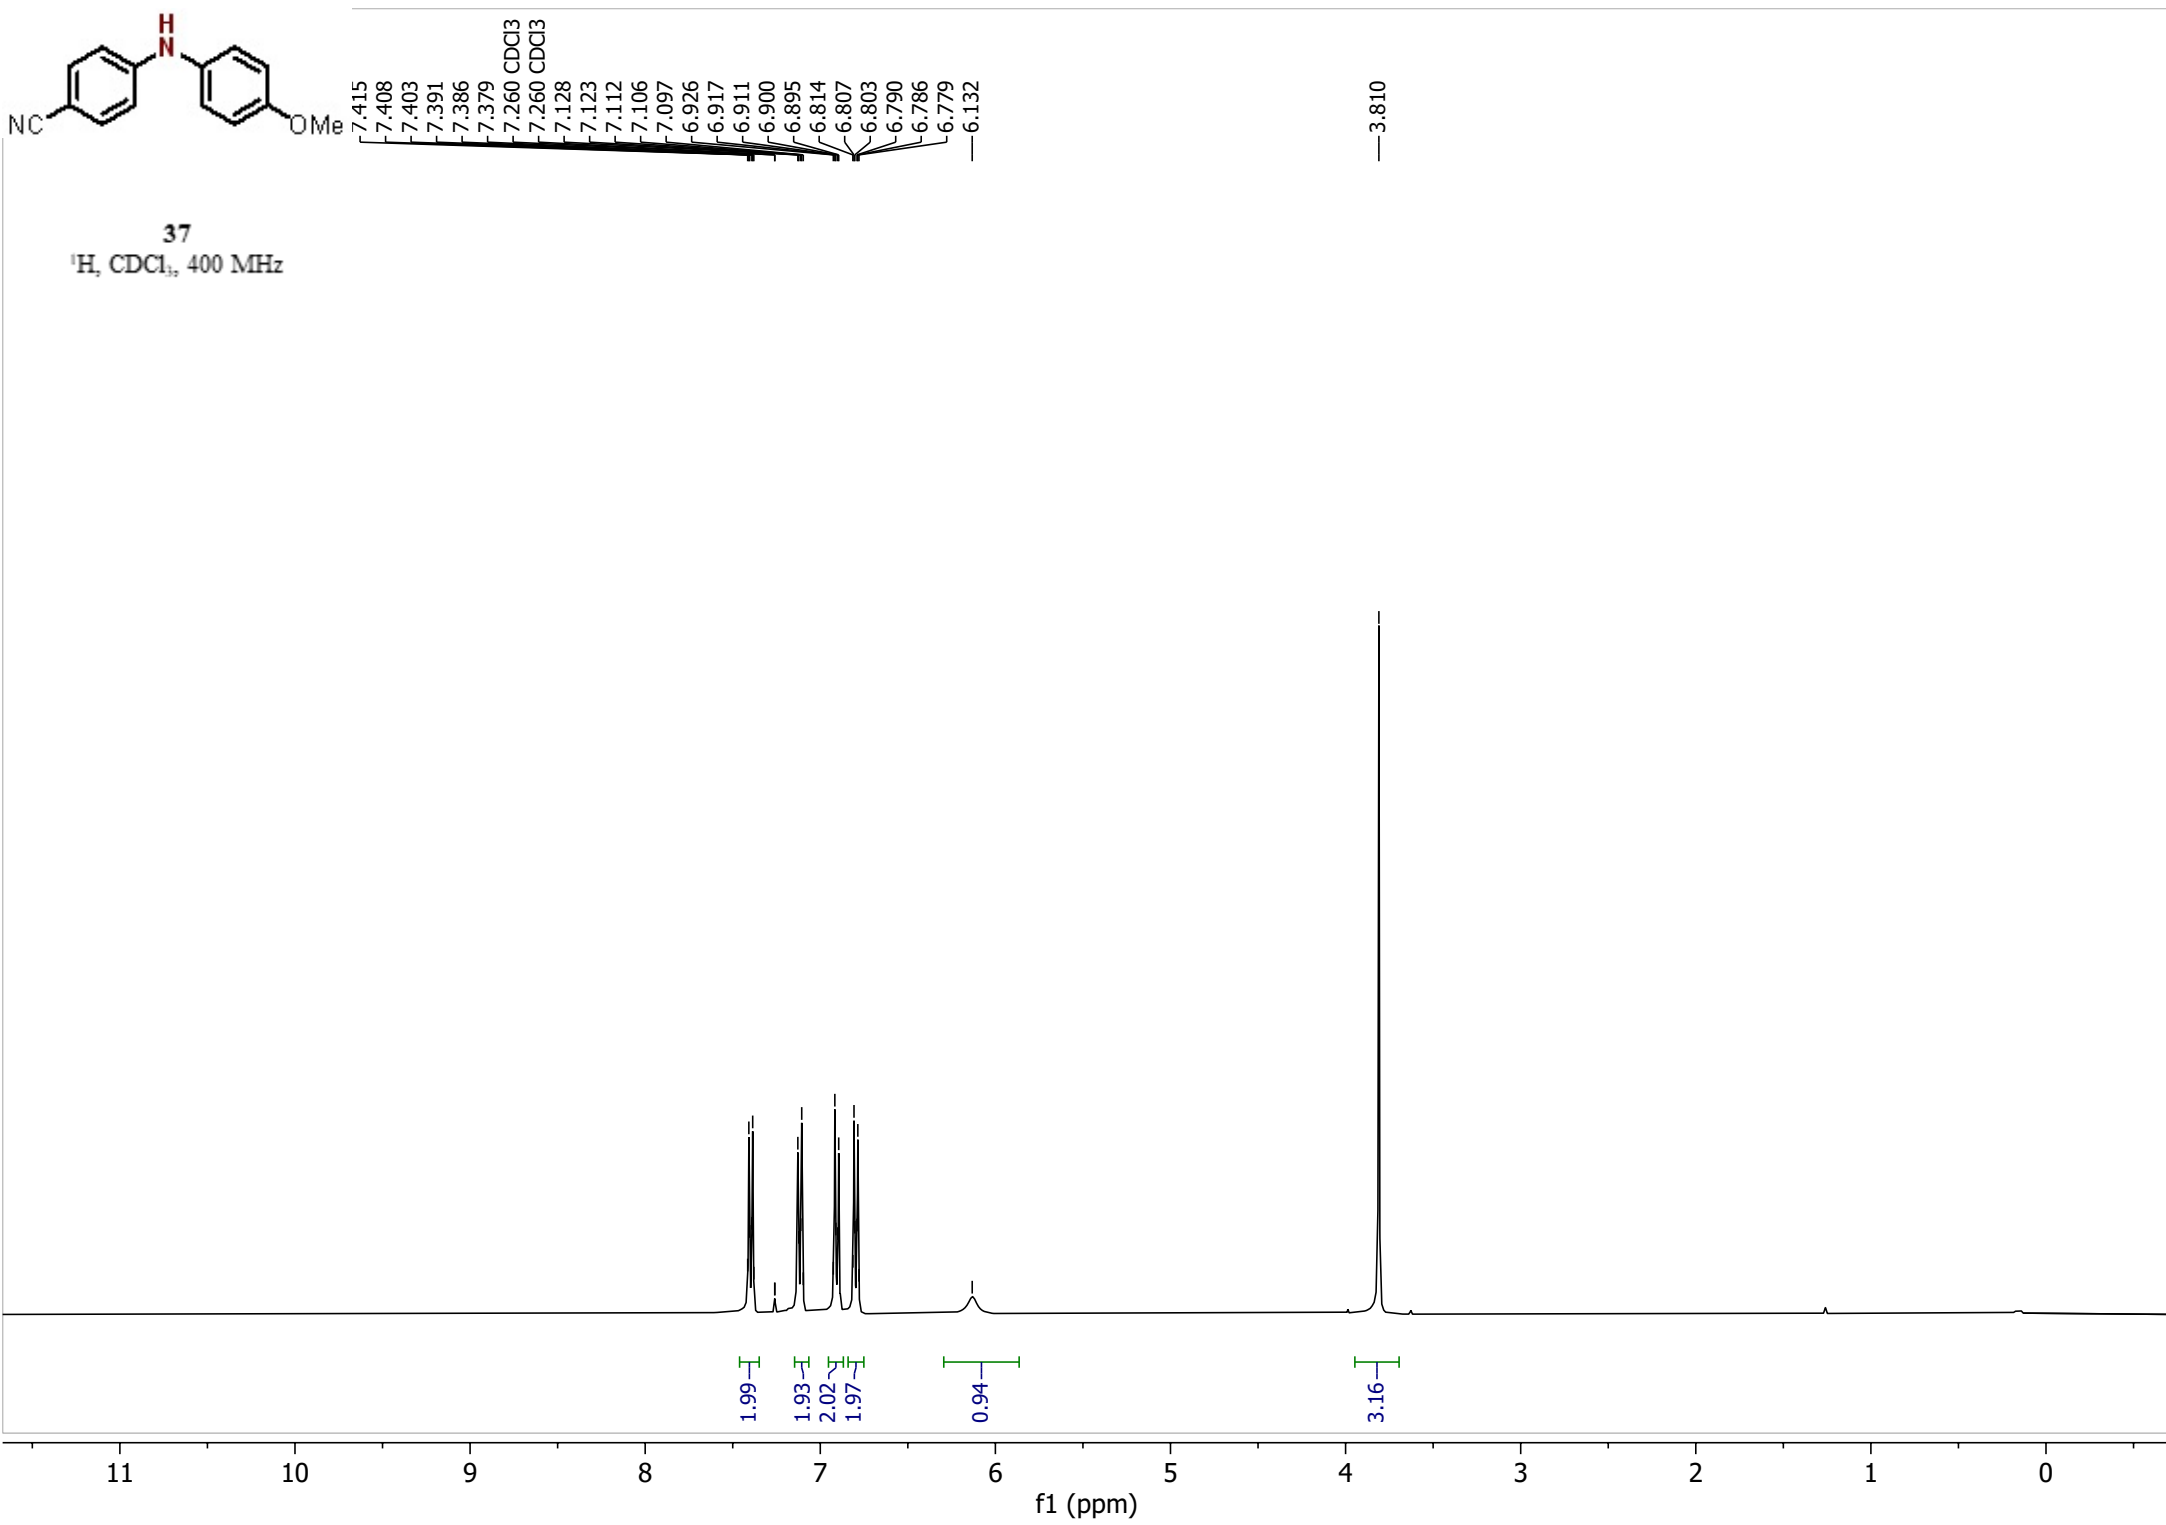

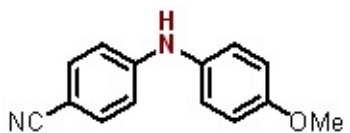

37  
 $^{13}\text{C}$ ,  $\text{CDCl}_3$ , 101 MHz

— 156.952

— 149.769

— 133.737

— 132.630

— 124.959

— 120.340

— 114.889

— 113.759

— 99.997

— 77.478  $\text{CDCl}_3$

— 77.160  $\text{CDCl}_3$

— 76.842  $\text{CDCl}_3$

— 55.566

210 200 190 180 170 160 150 140 130 120 110 100 90 80 70 60 50 40 30 20 10 0 -10

f1 (ppm)



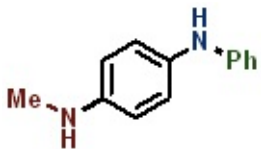

40  
<sup>1</sup>H, d<sub>6</sub>-DMSO, 400 MHz

7.478  
 7.102  
 7.084  
 7.081  
 7.068  
 7.063  
 6.918  
 6.910  
 6.904  
 6.894  
 6.888  
 6.880  
 6.781  
 6.761  
 6.614  
 6.596  
 6.577  
 6.529  
 6.520  
 6.515  
 6.504  
 6.499  
 5.339

3.320 H<sub>2</sub>O

2.650  
 2.510 DMSO  
 2.505 DMSO  
 2.500 DMSO-d<sub>6</sub>  
 2.495 DMSO  
 2.491 DMSO

1.235

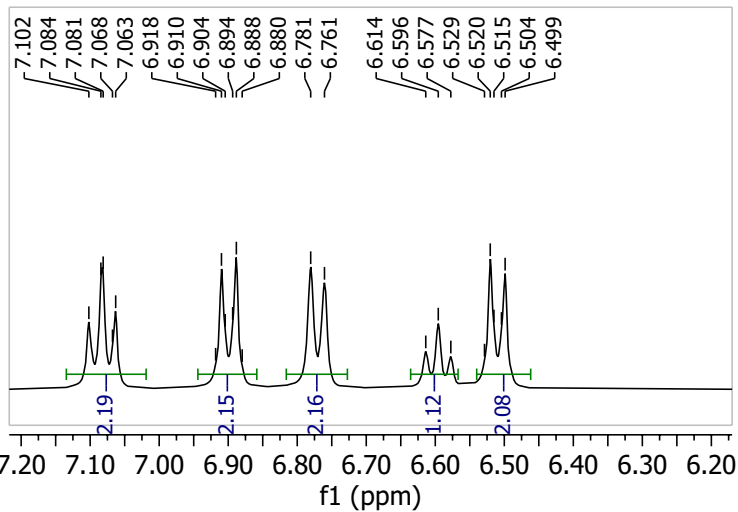

7.20  
 7.10  
 7.00  
 6.90  
 6.80  
 6.70  
 6.60  
 6.50  
 6.40  
 6.30  
 6.20

1.00

2.19

2.15

2.16

1.12

2.08

1.04

3.28

11

10

9

8

6

5

4

3

2

1

0

-1

f1 (ppm)

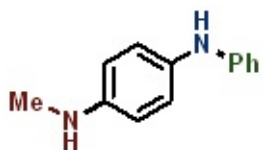

40  
 $^{13}\text{C}$ ,  $d_6$ -DMSO, 101 MHz

146.696  
145.578

131.421  
128.939

122.596

116.974  
113.588  
112.355

40.146 DMSO  
39.938 DMSO  
39.728 DMSO  
39.520 DMSO-d6  
39.312  
39.103  
38.894  
30.237

210 200 190 180 170 160 150 140 130 120 110 100 90 80 70 60 50 40 30 20 10 0 -10  
f1 (ppm)

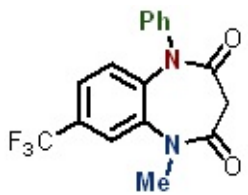

$^1\text{H}$ ,  $\text{CDCl}_3$ , 400 MHz

7.540  
7.518  
7.496  
7.475  
7.451  
7.446  
7.432  
7.428  
7.417  
7.412  
7.370  
7.357  
7.352  
7.336  
7.333  
7.260  $\text{CDCl}_3$   
7.260  $\text{CDCl}_3$   
7.201  
7.197  
7.192  
7.186  
7.179  
7.177

3.597  
3.566  
3.532  
3.493  
3.462

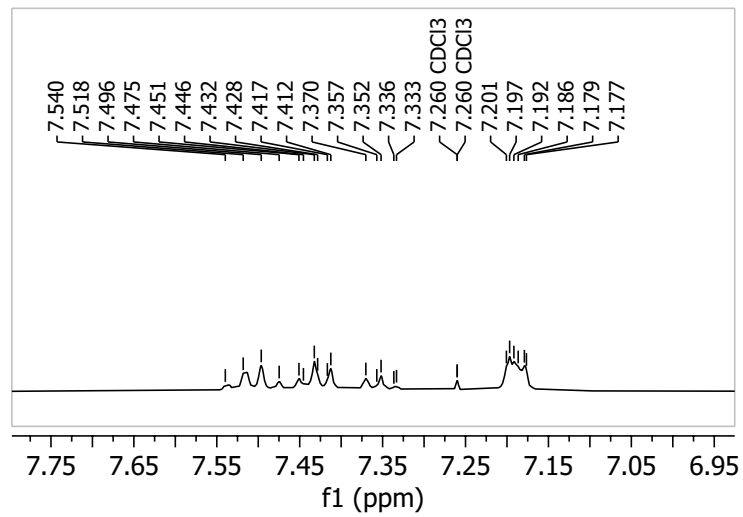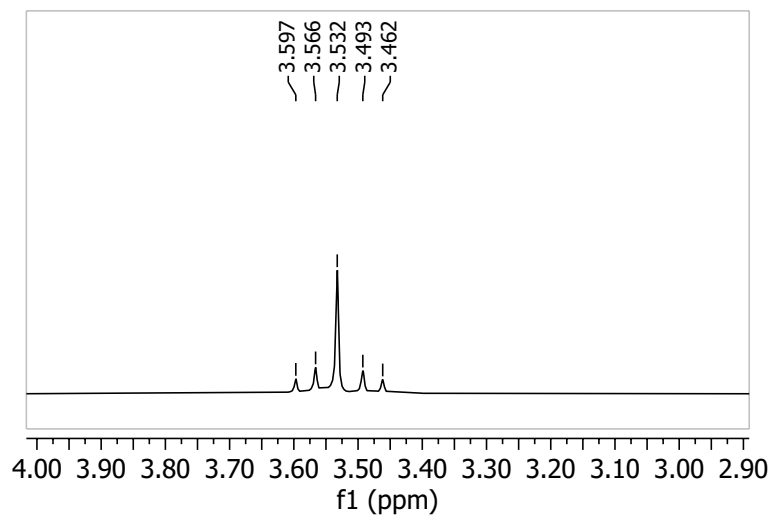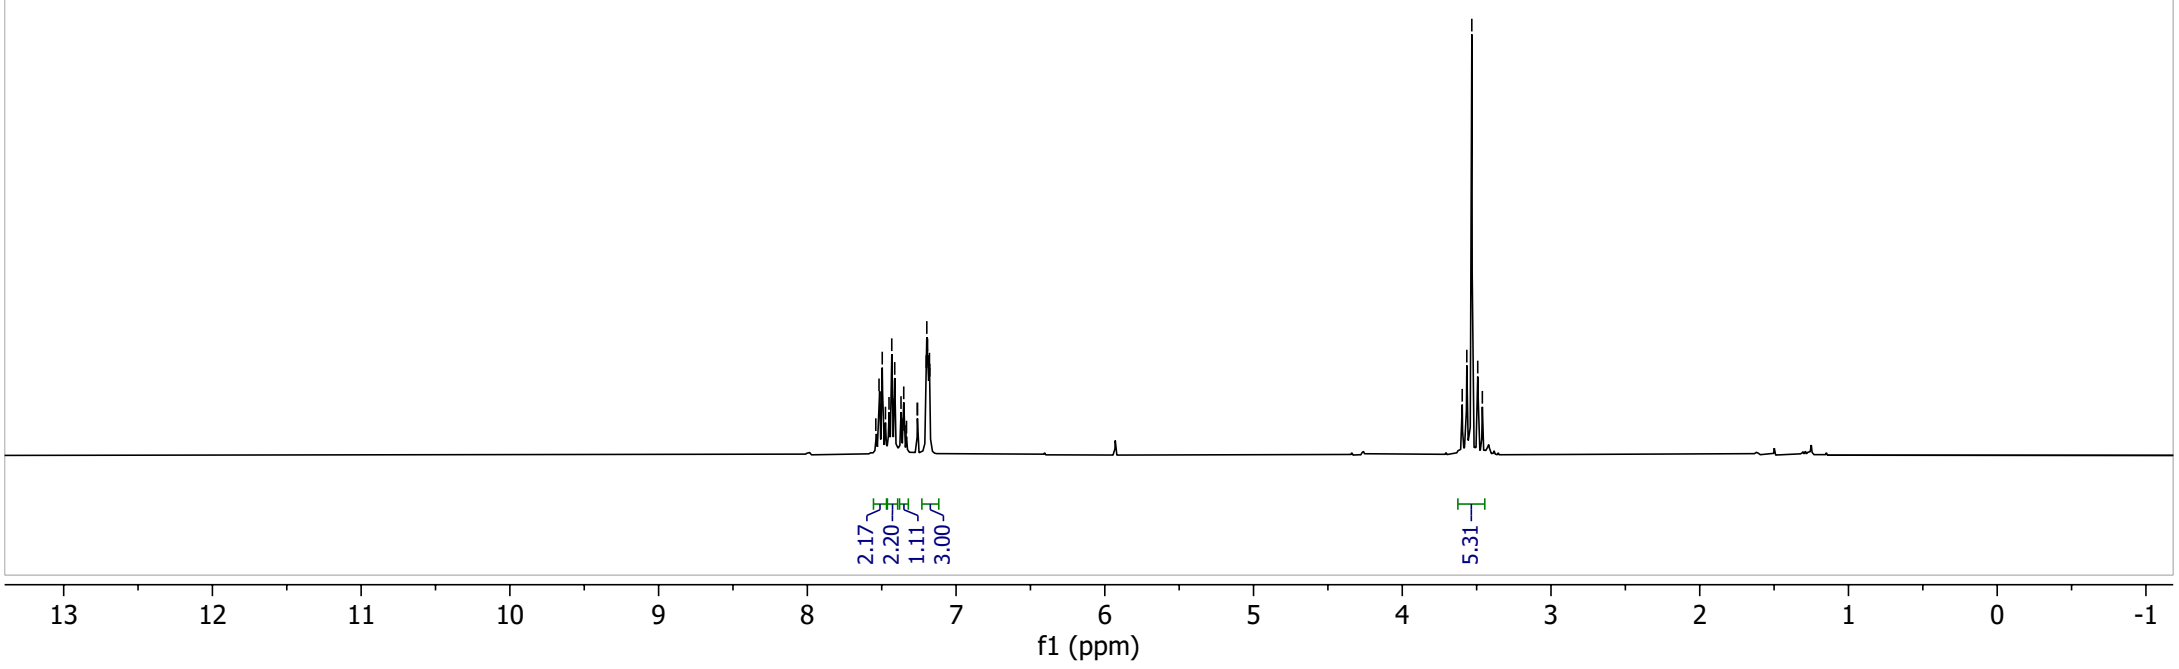



<sup>13</sup>C, CDCl<sub>3</sub>, 101 MHz

165.540  
164.323

140.164  
139.619  
136.236  
129.709  
129.124  
128.788  
128.455  
128.264  
128.120  
127.912  
127.272  
124.461  
123.614  
123.576  
123.553  
123.537  
123.509  
121.753  
119.045

77.478 CDCl<sub>3</sub>  
77.160 CDCl<sub>3</sub>  
76.841 CDCl<sub>3</sub>

44.740

35.771

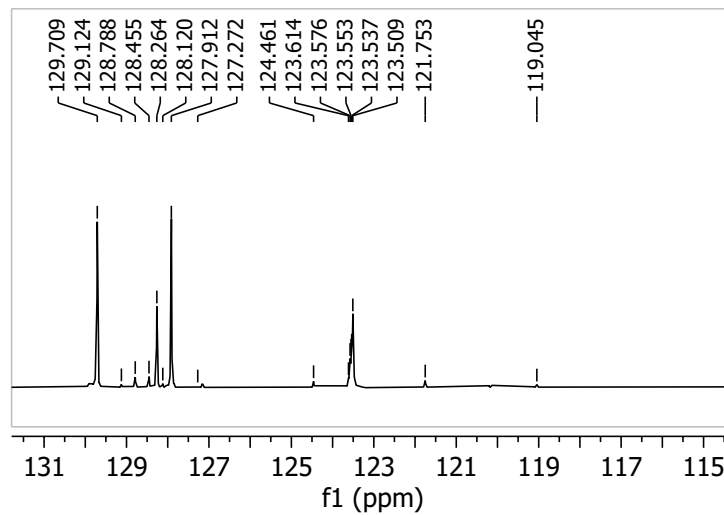

210 200 190 180 170 160 150 140 130 120 110 100 90 80 70 60 50 40 30 20 10 0 -10  
f1 (ppm)

## Reference:

<sup>1</sup> Murata, M.; Sambommatsu, T.; Watanabe, S.; Masuda, Y. An efficient catalyst system for palladium-catalyzed borylation of aryl halides with pinacolborane. *Synlett*, **2006**, *12*, 1867.

<sup>2</sup> <sup>13</sup>C NMR peak for CD<sub>3</sub> was not resolved. Similar report see: Reznichenko, A. L.; Hultsch, K. C. The Mechanism of Hydroaminoalkylation Catalyzed by Group 5 Metal Binaphtholate Complexes. *J. Am. Chem. Soc.* **2012**, *134*, 3300.

<sup>3</sup> Mansuy, D.; Battioni, P.; Chottard, J. C.; Riche, C.; Chiaroni, A. Nitrosoalkane Complexes of Iron-Porphyrins: Analogy between the Bonding Properties of Nitrosoalkanes and Dioxygen. *J. Am. Chem. Soc.* **1983**, *105*, 455.
